# Supplementary material for: Causal effects of immune cell surface antigens and functional outcome after ischemic stroke: a Mendelian randomization study
Source: Front Immunol. 2024 Mar 18;15:1353034. doi: 10.3389/fimmu.2024.1353034 (PMC10982317; doi:10.3389/fimmu.2024.1353034)
Supplement: Supplementary file 3 [file Table_2.xlsx]

## Sheet: Table S1
Table S2. Harmonization data of 389 MFIs of immune cell surface antigens and post-stroke functional outcome
SNP	effect_allele.exposure	other_allele.exposure	effect_allele.outcome	other_allele.outcome	beta.exposure	beta.outcome	eaf.exposure	eaf.outcome	remove	palindromic	ambiguous	id.outcome	se.outcome	pval.outcome	outcome	mr_keep.outcome	pval_origin.outcome	data_source.outcome	chr.exposure	pos.exposure	samplesize.exposure	se.exposure	pval.exposure	exposure	mr_keep.exposure	pval_origin.exposure	id.exposure	maf	action	mr_keep	samplesize.outcome	R2	F	steiger_pvalue
rs73165129	T	C	T	C	-0.5191	-0.0434	0.0987	0.0763	FALSE	FALSE	FALSE	Su9YkW	0.0948	0.6473	outcome	TRUE	reported	textfile	22	42315371	3592	0.04044	6.746e-37	1701	TRUE	reported	DdkGUD	0.0987	2	TRUE	6021	0.0438596	164.679	1.1022e-22
rs35744279	T	A	T	A	0.2764	-0.0287	0.0585	0.1241	FALSE	TRUE	FALSE	Su9YkW	0.0749	0.7015	outcome	TRUE	reported	textfile	3	190520073	3592	0.05361	2.666e-07	1701	TRUE	reported	DdkGUD	0.0585	2	TRUE	6021	0.00734592	26.567	0.000122617
rs191405504	T	A	T	A	-0.2722	-0.4784	0.0533	0.02	FALSE	TRUE	FALSE	Su9YkW	0.2355	0.04223	outcome	TRUE	reported	textfile	22	41305796	3592	0.0569	1.794e-06	1701	TRUE	reported	DdkGUD	0.0533	2	TRUE	6021	0.00633078	22.8723	0.0110753
rs1780947	T	C	T	C	0.3305	0.0748	0.0781	0.0642	FALSE	FALSE	FALSE	Su9YkW	0.1181	0.5264	outcome	TRUE	reported	textfile	14	20326938	3592	0.07004	2.458e-06	1701	TRUE	reported	DdkGUD	0.0781	2	TRUE	6021	0.00616071	22.254	0.000827993
rs12311737	G	C	G	C	0.1489	-0.0428	0.1807	0.1109	FALSE	TRUE	FALSE	Su9YkW	0.0816	0.5995	outcome	TRUE	reported	textfile	12	131958370	3592	0.03198	3.343e-06	1701	TRUE	reported	DdkGUD	0.1807	2	TRUE	6021	0.00599906	21.6666	0.000778514
rs73163382	C	G	C	G	-0.2506	0.2046	0.0533	0.0295	FALSE	TRUE	FALSE	Su9YkW	0.1582	0.1959	outcome	TRUE	reported	textfile	22	42251917	3592	0.05457	4.529e-06	1701	TRUE	reported	DdkGUD	0.0533	2	TRUE	6021	0.00583681	21.0772	0.0045087
rs4406935	A	C	A	C	0.1796	-0.0712	0.1101	0.8522	FALSE	FALSE	FALSE	Su9YkW	0.0725	0.3259	outcome	TRUE	reported	textfile	13	106357764	3592	0.03917	4.68e-06	1701	TRUE	reported	DdkGUD	0.1101	2	TRUE	6021	0.00581882	21.0118	0.00248832
rs111901500	T	C	T	C	0.1682	-0.1071	0.1254	0.066	FALSE	FALSE	FALSE	Su9YkW	0.105	0.308	outcome	TRUE	reported	textfile	14	48900270	3592	0.03714	6.104e-06	1701	TRUE	reported	DdkGUD	0.1254	2	TRUE	6021	0.00567753	20.4987	0.0031052
rs117920411	A	C	A	C	0.5393	0.3815	0.0111	0.0133	FALSE	FALSE	FALSE	Su9YkW	0.2823	0.1765	outcome	TRUE	reported	textfile	16	16968389	3592	0.1192	6.274e-06	1701	TRUE	reported	DdkGUD	0.0111	2	TRUE	6021	0.00566636	20.4582	0.00593998
rs4664360	G	A	G	A	-0.1252	-0.0691	0.2667	0.7534	FALSE	FALSE	FALSE	Su9YkW	0.0566	0.2228	outcome	TRUE	reported	textfile	2	161569376	3592	0.02775	6.566e-06	1701	TRUE	reported	DdkGUD	0.2667	2	TRUE	6021	0.00563498	20.3442	0.00478895
rs117457546	T	C	T	C	-0.3636	0.2008	0.0216	0.0214	FALSE	FALSE	FALSE	Su9YkW	0.2099	0.3387	outcome	TRUE	reported	textfile	19	8466710	3592	0.08184	9.133e-06	1701	TRUE	reported	DdkGUD	0.0216	2	TRUE	6021	0.00546513	19.7276	0.0034117
rs1628296	T	C	T	C	-0.3324	0.1156	0.0305	0.0463	FALSE	FALSE	FALSE	Su9YkW	0.1209	0.3389	outcome	TRUE	reported	textfile	12	123309183	3592	0.07489	9.349e-06	1701	TRUE	reported	DdkGUD	0.0305	2	TRUE	6021	0.0054546	19.6894	0.0034459
rs1009544	C	G	C	G	-1.167	0.0377	0.1256	0.121	FALSE	TRUE	FALSE	R6gTK0	0.0775	0.6262	outcome	TRUE	reported	textfile	22	42239348	3657	0.03217	1e-200	1702	TRUE	reported	thVPuo	0.1256	2	TRUE	6021	0.264622	1315.23	1.65126e-158
rs74481199	A	G	A	G	-0.5701	0.3711	0.0774	0.0273	FALSE	FALSE	FALSE	R6gTK0	0.1601	0.02044	outcome	TRUE	reported	textfile	22	43189335	3657	0.04715	4.881e-33	1702	TRUE	reported	thVPuo	0.0774	2	TRUE	6021	0.0384406	146.117	8.3186e-16
rs139784925	T	C	T	C	-0.5264	-0.4536	0.0572	0.023	FALSE	FALSE	FALSE	R6gTK0	0.2056	0.02738	outcome	TRUE	reported	textfile	22	41079533	3657	0.05557	4.759e-21	1702	TRUE	reported	thVPuo	0.0572	2	TRUE	6021	0.0239496	89.6837	1.1642e-09
rs150612106	A	G	A	G	-0.7112	0.3544	0.0261	0.024	FALSE	FALSE	FALSE	R6gTK0	0.196	0.07058	outcome	TRUE	reported	textfile	22	40175781	3657	0.07837	1.831e-19	1702	TRUE	reported	thVPuo	0.0261	2	TRUE	6021	0.0220235	82.3088	1.74934e-09
rs9611061	C	G	C	G	-0.4239	-0.1784	0.0655	0.0231	FALSE	TRUE	FALSE	R6gTK0	0.2115	0.3989	outcome	TRUE	reported	textfile	22	39375623	3657	0.05212	5.739e-16	1702	TRUE	reported	thVPuo	0.0655	2	TRUE	6021	0.0177667	66.112	4.17829e-09
rs6000850	C	T	C	T	0.5426	0.2443	0.0194	0.9557	FALSE	FALSE	FALSE	R6gTK0	0.1362	0.07299	outcome	TRUE	reported	textfile	22	38032090	3657	0.09189	3.857e-09	1702	TRUE	reported	thVPuo	0.0194	2	TRUE	6021	0.00944446	34.8486	0.000388934
rs76015644	G	A	G	A	-0.5345	0.0957	0.0194	0.0192	FALSE	FALSE	FALSE	R6gTK0	0.1953	0.6243	outcome	TRUE	reported	textfile	22	44355693	3657	0.09074	4.191e-09	1702	TRUE	reported	thVPuo	0.0194	2	TRUE	6021	0.00939879	34.6785	1.44251e-05
rs73176684	C	T	C	T	0.2877	0.0658	0.0595	0.0494	FALSE	FALSE	FALSE	R6gTK0	0.1185	0.5787	outcome	TRUE	reported	textfile	22	41778617	3657	0.05253	4.617e-08	1702	TRUE	reported	thVPuo	0.0595	2	TRUE	6021	0.00813565	29.9797	7.11457e-05
rs4657041	C	T	C	T	-0.1431	-0.01	0.3344	0.5101	FALSE	FALSE	FALSE	R6gTK0	0.0486	0.8373	outcome	TRUE	reported	textfile	1	161478859	3657	0.02699	1.22e-07	1702	TRUE	reported	thVPuo	0.3344	2	TRUE	6021	0.00762822	28.0954	5.12559e-05
rs1885397	C	A	C	A	-0.1484	0.052	0.1903	0.2449	FALSE	FALSE	FALSE	R6gTK0	0.0595	0.3817	outcome	TRUE	reported	textfile	14	55233098	3657	0.03233	4.603e-06	1702	TRUE	reported	thVPuo	0.1903	2	TRUE	6021	0.00572844	21.0581	0.00207244
rs56020760	T	C	T	C	-0.2405	0.1212	0.0607	0.0712	FALSE	FALSE	FALSE	R6gTK0	0.0968	0.2108	outcome	TRUE	reported	textfile	10	72391681	3657	0.05248	4.74e-06	1702	TRUE	reported	thVPuo	0.0607	2	TRUE	6021	0.00570993	20.9896	0.00449142
rs2925323	T	C	T	C	-0.1283	-0.1066	0.2923	0.3748	FALSE	FALSE	FALSE	R6gTK0	0.0499	0.03272	outcome	TRUE	reported	textfile	3	101658926	3657	0.02811	5.128e-06	1702	TRUE	reported	thVPuo	0.2923	2	TRUE	6021	0.00566422	20.8206	0.0223965
rs6680891	T	A	T	A	0.139	-0.034	0.2122	0.3221	FALSE	TRUE	FALSE	R6gTK0	0.0528	0.5194	outcome	TRUE	reported	textfile	1	164083691	3657	0.03051	5.369e-06	1702	TRUE	reported	thVPuo	0.2122	2	TRUE	6021	0.00564368	20.7447	0.00140293
rs1009544	C	G	C	G	-1.158	0.0377	0.1256	0.121	FALSE	TRUE	FALSE	MiVQvG	0.0775	0.6262	outcome	TRUE	reported	textfile	22	42239348	3657	0.03225	1e-200	1703	TRUE	reported	MThpCn	0.1256	2	TRUE	6021	0.260661	1288.61	1.31801e-155
rs74481199	A	G	A	G	-0.5592	0.3711	0.0774	0.0273	FALSE	FALSE	FALSE	MiVQvG	0.1601	0.02044	outcome	TRUE	reported	textfile	22	43189335	3657	0.04716	7.657e-32	1703	TRUE	reported	MThpCn	0.0774	2	TRUE	6021	0.0370235	140.524	3.58566e-15
rs139784925	T	C	T	C	-0.5155	-0.4536	0.0572	0.023	FALSE	FALSE	FALSE	MiVQvG	0.2056	0.02738	outcome	TRUE	reported	textfile	22	41079533	3657	0.05559	2.978e-20	1703	TRUE	reported	MThpCn	0.0572	2	TRUE	6021	0.0229744	85.9461	3.03634e-09
rs150612106	A	G	A	G	-0.708	0.3544	0.0261	0.024	FALSE	FALSE	FALSE	MiVQvG	0.196	0.07058	outcome	TRUE	reported	textfile	22	40175781	3657	0.07837	2.616e-19	1703	TRUE	reported	MThpCn	0.0261	2	TRUE	6021	0.0218301	81.5698	2.12866e-09
rs9611061	C	G	C	G	-0.4325	-0.1784	0.0655	0.0231	FALSE	TRUE	FALSE	MiVQvG	0.2115	0.3989	outcome	TRUE	reported	textfile	22	39375623	3657	0.05209	1.406e-16	1703	TRUE	reported	MThpCn	0.0655	2	TRUE	6021	0.0185024	68.9011	1.8591e-09
rs76015644	G	A	G	A	-0.5506	0.0957	0.0194	0.0192	FALSE	FALSE	FALSE	MiVQvG	0.1953	0.6243	outcome	TRUE	reported	textfile	22	44355693	3657	0.09071	1.409e-09	1703	TRUE	reported	MThpCn	0.0194	2	TRUE	6021	0.00997433	36.8235	7.53026e-06
rs6000850	C	T	C	T	0.5349	0.2443	0.0194	0.9557	FALSE	FALSE	FALSE	MiVQvG	0.1362	0.07299	outcome	TRUE	reported	textfile	22	38032090	3657	0.09188	6.305e-09	1703	TRUE	reported	MThpCn	0.0194	2	TRUE	6021	0.00918273	33.8739	0.000497317
rs73176684	C	T	C	T	0.2891	0.0658	0.0595	0.0494	FALSE	FALSE	FALSE	MiVQvG	0.1185	0.5787	outcome	TRUE	reported	textfile	22	41778617	3657	0.05253	3.957e-08	1703	TRUE	reported	MThpCn	0.0595	2	TRUE	6021	0.00821437	30.2722	6.51449e-05
rs4657041	C	T	C	T	-0.1392	-0.01	0.3344	0.5101	FALSE	FALSE	FALSE	MiVQvG	0.0486	0.8373	outcome	TRUE	reported	textfile	1	161478859	3657	0.02699	2.626e-07	1703	TRUE	reported	MThpCn	0.3344	2	TRUE	6021	0.00722105	26.5849	8.27529e-05
rs56020760	T	C	T	C	-0.2447	0.1212	0.0607	0.0712	FALSE	FALSE	FALSE	MiVQvG	0.0968	0.2108	outcome	TRUE	reported	textfile	10	72391681	3657	0.05247	3.216e-06	1703	TRUE	reported	MThpCn	0.0607	2	TRUE	6021	0.00591215	21.7374	0.00367198
rs6680891	T	A	T	A	0.1373	-0.034	0.2122	0.3221	FALSE	TRUE	FALSE	MiVQvG	0.0528	0.5194	outcome	TRUE	reported	textfile	1	164083691	3657	0.03051	6.977e-06	1703	TRUE	reported	MThpCn	0.2122	2	TRUE	6021	0.00550723	20.2404	0.00163145
rs72658947	C	G	C	G	-0.403	-0.3391	0.0187	0.031	FALSE	TRUE	FALSE	MiVQvG	0.1764	0.0546	outcome	TRUE	reported	textfile	1	30372026	3657	0.08982	7.465e-06	1703	TRUE	reported	MThpCn	0.0187	2	TRUE	6021	0.00547463	20.1199	0.0185679
rs1885397	C	A	C	A	-0.1449	0.052	0.1903	0.2449	FALSE	FALSE	FALSE	MiVQvG	0.0595	0.3817	outcome	TRUE	reported	textfile	14	55233098	3657	0.03233	7.679e-06	1703	TRUE	reported	MThpCn	0.1903	2	TRUE	6021	0.00546288	20.0765	0.00274889
rs114318843	C	T	C	T	-0.5009	-0.0691	0.0122	0.0315	FALSE	FALSE	FALSE	MiVQvG	0.1526	0.6506	outcome	TRUE	reported	textfile	2	164755835	3657	0.1124	8.636e-06	1703	TRUE	reported	MThpCn	0.0122	2	TRUE	6021	0.00540123	19.8487	0.00122383
rs1009544	C	G	C	G	-1.138	0.0377	0.1256	0.121	FALSE	TRUE	FALSE	C122lU	0.0775	0.6262	outcome	TRUE	reported	textfile	22	42239348	3657	0.03239	1e-200	1704	TRUE	reported	KxNm5p	0.1256	2	TRUE	6021	0.252364	1233.74	1.35761e-149
rs735537	G	A	G	A	0.2844	-0.0705	0.458	0.4353	FALSE	FALSE	FALSE	C122lU	0.0501	0.159	outcome	TRUE	reported	textfile	22	42812471	3657	0.02509	2.658e-29	1704	TRUE	reported	KxNm5p	0.458	2	TRUE	6021	0.0339419	128.416	1.02667e-15
rs148646251	G	A	G	A	-0.5549	-0.5678	0.0546	0.0255	FALSE	FALSE	FALSE	C122lU	0.1893	0.002701	outcome	TRUE	reported	textfile	22	40987104	3657	0.05621	1.056e-22	1704	TRUE	reported	KxNm5p	0.0546	2	TRUE	6021	0.0259571	97.4013	3.4478e-09
rs9611061	C	G	C	G	-0.431	-0.1784	0.0655	0.0231	FALSE	TRUE	FALSE	C122lU	0.2115	0.3989	outcome	TRUE	reported	textfile	22	39375623	3657	0.05202	1.626e-16	1704	TRUE	reported	KxNm5p	0.0655	2	TRUE	6021	0.0184252	68.6082	2.02409e-09
rs13058590	T	C	T	C	-0.4122	0.0849	0.0468	0.0241	FALSE	FALSE	FALSE	C122lU	0.187	0.6499	outcome	TRUE	reported	textfile	22	39641412	3657	0.0591	3.639e-12	1704	TRUE	reported	KxNm5p	0.0468	2	TRUE	6021	0.0131274	48.6187	1.89168e-07
rs1801274	G	A	G	A	-0.1805	-0.0136	0.325	0.5096	FALSE	FALSE	FALSE	C122lU	0.0485	0.7784	outcome	TRUE	reported	textfile	1	161479745	3657	0.02691	2.289e-11	1704	TRUE	reported	KxNm5p	0.325	2	TRUE	6021	0.0121532	44.9665	3.272e-07
rs12170003	T	C	T	C	-0.3208	-0.0422	0.0648	0.0337	FALSE	FALSE	FALSE	C122lU	0.1577	0.7888	outcome	TRUE	reported	textfile	22	37748690	3657	0.05083	3.077e-10	1704	TRUE	reported	KxNm5p	0.0648	2	TRUE	6021	0.0107745	39.8099	1.55394e-06
rs76015644	G	A	G	A	-0.4864	0.0957	0.0194	0.0192	FALSE	FALSE	FALSE	C122lU	0.1953	0.6243	outcome	TRUE	reported	textfile	22	44355693	3657	0.0907	8.71e-08	1704	TRUE	reported	KxNm5p	0.0194	2	TRUE	6021	0.00780271	28.7432	8.75006e-05
rs2925323	T	C	T	C	-0.1319	-0.1066	0.2923	0.3748	FALSE	FALSE	FALSE	C122lU	0.0499	0.03272	outcome	TRUE	reported	textfile	3	101658926	3657	0.02806	2.676e-06	1704	TRUE	reported	KxNm5p	0.2923	2	TRUE	6021	0.00600583	22.0839	0.0168088
rs1563991	T	G	T	G	0.1491	-0.0662	0.1937	0.8164	FALSE	FALSE	FALSE	C122lU	0.0639	0.3005	outcome	TRUE	reported	textfile	11	37670518	3657	0.03174	2.722e-06	1704	TRUE	reported	KxNm5p	0.1937	2	TRUE	6021	0.00599796	22.0548	0.00218029
rs148563640	T	C	T	C	0.4012	-0.0929	0.0219	0.0216	FALSE	FALSE	FALSE	C122lU	0.2536	0.7142	outcome	TRUE	reported	textfile	17	48145906	3657	0.0856	2.878e-06	1704	TRUE	reported	KxNm5p	0.0219	2	TRUE	6021	0.00597102	21.9552	0.000524917
rs6680891	T	A	T	A	0.1402	-0.034	0.2122	0.3221	FALSE	TRUE	FALSE	C122lU	0.0528	0.5194	outcome	TRUE	reported	textfile	1	164083691	3657	0.03047	4.31e-06	1704	TRUE	reported	KxNm5p	0.2122	2	TRUE	6021	0.00575598	21.1599	0.0012391
rs35754161	T	G	T	G	-0.1159	-0.0547	0.4649	0.3544	FALSE	FALSE	FALSE	C122lU	0.0515	0.2887	outcome	TRUE	reported	textfile	15	51655048	3657	0.02548	5.586e-06	1704	TRUE	reported	KxNm5p	0.4649	2	TRUE	6021	0.00562591	20.679	0.00337477
rs4880914	G	A	G	A	-0.1388	0.0244	0.1957	0.7963	FALSE	FALSE	FALSE	C122lU	0.0617	0.692	outcome	TRUE	reported	textfile	10	1746219	3657	0.03116	8.73e-06	1704	TRUE	reported	KxNm5p	0.1957	2	TRUE	6021	0.00539646	19.8311	0.00108708
rs149153670	C	T	C	T	-0.534	0.0894	0.0118	0.0383	FALSE	FALSE	FALSE	C122lU	0.1469	0.5428	outcome	TRUE	reported	textfile	2	142280835	3657	0.1199	8.666e-06	1704	TRUE	reported	KxNm5p	0.0118	2	TRUE	6021	0.00539473	19.8247	0.00171608
rs2939924	T	C	T	C	0.1178	0.0047	0.3273	0.4883	FALSE	FALSE	FALSE	C122lU	0.0488	0.9228	outcome	TRUE	reported	textfile	10	132491701	3657	0.02661	9.807e-06	1704	TRUE	reported	KxNm5p	0.3273	2	TRUE	6021	0.00533034	19.5868	0.000605431
rs1009544	C	G	C	G	-1.141	0.0377	0.1255	0.121	FALSE	TRUE	FALSE	wURyJf	0.0775	0.6262	outcome	TRUE	reported	textfile	22	42239348	3645	0.03229	1e-200	1705	TRUE	reported	H7NVKS	0.1255	2	TRUE	6021	0.255155	1247.95	2.66798e-151
rs74481199	A	G	A	G	-0.5458	0.3711	0.0774	0.0273	FALSE	FALSE	FALSE	wURyJf	0.1601	0.02044	outcome	TRUE	reported	textfile	22	43189335	3645	0.04717	1.976e-30	1705	TRUE	reported	H7NVKS	0.0774	2	TRUE	6021	0.03543	133.813	1.95392e-14
rs139784925	T	C	T	C	-0.5399	-0.4536	0.0572	0.023	FALSE	FALSE	FALSE	wURyJf	0.2056	0.02738	outcome	TRUE	reported	textfile	22	41079533	3645	0.05543	3.759e-22	1705	TRUE	reported	H7NVKS	0.0572	2	TRUE	6021	0.0253676	94.8197	2.98671e-10
rs150612106	A	G	A	G	-0.7075	0.3544	0.0261	0.024	FALSE	FALSE	FALSE	wURyJf	0.196	0.07058	outcome	TRUE	reported	textfile	22	40175781	3645	0.0784	2.881e-19	1705	TRUE	reported	H7NVKS	0.0261	2	TRUE	6021	0.0218538	81.3921	2.15789e-09
rs9611061	C	G	C	G	-0.4284	-0.1784	0.0653	0.0231	FALSE	TRUE	FALSE	wURyJf	0.2115	0.3989	outcome	TRUE	reported	textfile	22	39375623	3645	0.05214	2.89e-16	1705	TRUE	reported	H7NVKS	0.0653	2	TRUE	6021	0.018184	67.4712	2.73991e-09
rs76015644	G	A	G	A	-0.5383	0.0957	0.0196	0.0192	FALSE	FALSE	FALSE	wURyJf	0.1953	0.6243	outcome	TRUE	reported	textfile	22	44355693	3645	0.09015	2.593e-09	1705	TRUE	reported	H7NVKS	0.0196	2	TRUE	6021	0.00968707	35.6352	1.06354e-05
rs6000850	C	T	C	T	0.4996	0.2443	0.0192	0.9557	FALSE	FALSE	FALSE	wURyJf	0.1362	0.07299	outcome	TRUE	reported	textfile	22	38032090	3645	0.09205	6.063e-08	1705	TRUE	reported	H7NVKS	0.0192	2	TRUE	6021	0.00801686	29.4414	0.00149134
rs73176684	C	T	C	T	0.2707	0.0658	0.0594	0.0494	FALSE	FALSE	FALSE	wURyJf	0.1185	0.5787	outcome	TRUE	reported	textfile	22	41778617	3645	0.05245	2.595e-07	1705	TRUE	reported	H7NVKS	0.0594	2	TRUE	6021	0.00725481	26.6224	0.000193623
rs1801274	G	A	G	A	-0.1327	-0.0136	0.3254	0.5096	FALSE	FALSE	FALSE	wURyJf	0.0485	0.7784	outcome	TRUE	reported	textfile	1	161479745	3645	0.02696	8.914e-07	1705	TRUE	reported	H7NVKS	0.3254	2	TRUE	6021	0.00660279	24.2138	0.000208912
rs2939924	T	C	T	C	0.1263	0.0047	0.328	0.4883	FALSE	FALSE	FALSE	wURyJf	0.0488	0.9228	outcome	TRUE	reported	textfile	10	132491701	3645	0.02656	2.071e-06	1705	TRUE	reported	H7NVKS	0.328	2	TRUE	6021	0.00616548	22.6002	0.000224451
rs2519807	C	T	C	T	-0.1252	-0.0868	0.3014	0.6546	FALSE	FALSE	FALSE	wURyJf	0.0518	0.09404	outcome	TRUE	reported	textfile	9	136826108	3645	0.02741	5.126e-06	1705	TRUE	reported	H7NVKS	0.3014	2	TRUE	6021	0.00569134	20.8522	0.0100946
rs2925323	T	C	T	C	-0.128	-0.1066	0.2927	0.3748	FALSE	FALSE	FALSE	wURyJf	0.0499	0.03272	outcome	TRUE	reported	textfile	3	101658926	3645	0.02803	5.113e-06	1705	TRUE	reported	H7NVKS	0.2927	2	TRUE	6021	0.00568851	20.8418	0.0220812
rs6680891	T	A	T	A	0.139	-0.034	0.2122	0.3221	FALSE	TRUE	FALSE	wURyJf	0.0528	0.5194	outcome	TRUE	reported	textfile	1	164083691	3645	0.03044	5.129e-06	1705	TRUE	reported	H7NVKS	0.2122	2	TRUE	6021	0.00568808	20.8402	0.00135103
rs448333	C	T	C	T	-0.1463	-0.0855	0.1909	0.7436	FALSE	FALSE	FALSE	wURyJf	0.0566	0.1312	outcome	TRUE	reported	textfile	6	97236851	3645	0.03251	7.014e-06	1705	TRUE	reported	H7NVKS	0.1909	2	TRUE	6021	0.00552524	20.2403	0.00877332
rs1563991	T	G	T	G	0.1422	-0.0662	0.1941	0.8164	FALSE	FALSE	FALSE	wURyJf	0.0639	0.3005	outcome	TRUE	reported	textfile	11	37670518	3645	0.03169	7.444e-06	1705	TRUE	reported	H7NVKS	0.1941	2	TRUE	6021	0.0054937	20.1241	0.00370862
rs56020760	T	C	T	C	-0.2324	0.1212	0.0609	0.0712	FALSE	FALSE	FALSE	wURyJf	0.0968	0.2108	outcome	TRUE	reported	textfile	10	72391681	3645	0.0523	9.101e-06	1705	TRUE	reported	H7NVKS	0.0609	2	TRUE	6021	0.00538797	19.7347	0.00623886
rs6002543	G	C	G	C	-1.52	-0.0731	0.0947	0.0786	FALSE	TRUE	FALSE	HZofiQ	0.0942	0.4379	outcome	TRUE	reported	textfile	22	42320547	1837	0.0467	9.105e-184	1706	TRUE	reported	NfimYF	0.0947	2	TRUE	6021	0.365761	1058.23	5.69565e-148
rs2018340	A	G	A	G	-0.472	0.1848	0.1375	0.0954	FALSE	FALSE	FALSE	HZofiQ	0.0854	0.03051	outcome	TRUE	reported	textfile	22	43390319	1837	0.04978	7.453e-21	1706	TRUE	reported	NfimYF	0.1375	2	TRUE	6021	0.0466567	89.8051	6.63777e-13
rs1894588	T	C	T	C	-0.607	0.0849	0.061	0.0353	FALSE	FALSE	FALSE	HZofiQ	0.1518	0.5761	outcome	TRUE	reported	textfile	22	40629980	1837	0.07005	9.72e-18	1706	TRUE	reported	NfimYF	0.061	2	TRUE	6021	0.0392693	75.0046	3.78794e-13
rs117705111	A	G	A	G	-0.7129	-0.0917	0.0346	0.0374	FALSE	FALSE	FALSE	HZofiQ	0.1381	0.5065	outcome	TRUE	reported	textfile	22	41957510	1837	0.09169	1.246e-14	1706	TRUE	reported	NfimYF	0.0346	2	TRUE	6021	0.0318598	60.3865	1.13907e-10
rs76146864	T	C	T	C	-0.7454	0.2468	0.025	0.0262	FALSE	FALSE	FALSE	HZofiQ	0.181	0.1727	outcome	TRUE	reported	textfile	22	40246055	1837	0.1101	1.741e-11	1706	TRUE	reported	NfimYF	0.025	2	TRUE	6021	0.024344	45.7858	1.58729e-07
rs5757678	T	C	T	C	0.2286	0.0797	0.3514	0.718	FALSE	FALSE	FALSE	HZofiQ	0.0556	0.152	outcome	TRUE	reported	textfile	22	39843409	1837	0.03604	2.819e-10	1706	TRUE	reported	NfimYF	0.3514	2	TRUE	6021	0.0214321	40.1892	1.30681e-06
rs149806587	G	A	G	A	-0.5047	-0.5344	0.0517	0.0183	FALSE	FALSE	FALSE	HZofiQ	0.279	0.05545	outcome	TRUE	reported	textfile	22	40774205	1837	0.07979	3.176e-10	1706	TRUE	reported	NfimYF	0.0517	2	TRUE	6021	0.0213159	39.9665	4.4192e-06
rs35291683	A	G	A	G	0.2993	-0.0365	0.107	0.1055	FALSE	FALSE	FALSE	HZofiQ	0.0813	0.6534	outcome	TRUE	reported	textfile	21	42576275	1837	0.05538	7.342e-08	1706	TRUE	reported	NfimYF	0.107	2	TRUE	6021	0.0156512	29.1766	6.77317e-06
rs57736830	G	C	G	C	-0.2285	0.023	0.1644	0.1866	FALSE	TRUE	FALSE	HZofiQ	0.0691	0.7389	outcome	TRUE	reported	textfile	5	168402085	1837	0.04582	6.675e-07	1706	TRUE	reported	NfimYF	0.1644	2	TRUE	6021	0.0133571	24.8421	2.74086e-05
rs73451452	A	T	A	T	0.4597	0.0296	0.0362	0.0519	FALSE	TRUE	FALSE	HZofiQ	0.1243	0.8115	outcome	TRUE	reported	textfile	7	137804100	1837	0.09304	8.49e-07	1706	TRUE	reported	NfimYF	0.0362	2	TRUE	6021	0.013115	24.3858	2.67203e-05
rs11599977	A	G	A	G	0.196	0.0056	0.2213	0.8479	FALSE	FALSE	FALSE	HZofiQ	0.069	0.9348	outcome	TRUE	reported	textfile	11	38419307	1837	0.04096	1.844e-06	1706	TRUE	reported	NfimYF	0.2213	2	TRUE	6021	0.0123113	22.8728	3.47024e-05
rs115650989	A	G	A	G	-0.4764	0.0993	0.0299	0.0229	FALSE	FALSE	FALSE	HZofiQ	0.1811	0.5836	outcome	TRUE	reported	textfile	8	145510474	1837	0.09988	1.993e-06	1706	TRUE	reported	NfimYF	0.0299	2	TRUE	6021	0.012233	22.7255	9.57921e-05
rs79451942	T	G	T	G	-0.5787	-0.082	0.0193	0.0215	FALSE	FALSE	FALSE	HZofiQ	0.2132	0.7006	outcome	TRUE	reported	textfile	11	109330334	1837	0.1229	2.695e-06	1706	TRUE	reported	NfimYF	0.0193	2	TRUE	6021	0.0119257	22.1478	8.59986e-05
rs9815713	G	A	G	A	0.2446	-0.0424	0.1173	0.1217	FALSE	FALSE	FALSE	HZofiQ	0.0772	0.5826	outcome	TRUE	reported	textfile	3	153568131	1837	0.0528	3.88e-06	1706	TRUE	reported	NfimYF	0.1173	2	TRUE	6021	0.0115476	21.4374	0.000156041
rs75589560	G	C	G	C	0.3871	0.1454	0.0441	0.0599	FALSE	TRUE	FALSE	HZofiQ	0.1137	0.2011	outcome	TRUE	reported	textfile	8	129239338	1837	0.08431	4.694e-06	1706	TRUE	reported	NfimYF	0.0441	2	TRUE	6021	0.0113455	21.0579	0.00069165
rs17596501	A	G	A	G	0.162	0.0324	0.3606	0.311	FALSE	FALSE	FALSE	HZofiQ	0.0533	0.5435	outcome	TRUE	reported	textfile	5	1557372	1837	0.03541	5.077e-06	1706	TRUE	reported	NfimYF	0.3606	2	TRUE	6021	0.0112655	20.9076	0.000213244
rs139758246	C	T	C	T	-0.6514	0.2542	0.0152	0.0167	FALSE	FALSE	FALSE	HZofiQ	0.2976	0.3929	outcome	TRUE	reported	textfile	16	1227020	1837	0.1425	5.188e-06	1706	TRUE	reported	NfimYF	0.0152	2	TRUE	6021	0.0112472	20.8734	0.000342925
rs10155189	C	T	C	T	0.1673	0.025	0.3304	0.5192	FALSE	FALSE	FALSE	HZofiQ	0.0499	0.6161	outcome	TRUE	reported	textfile	4	38927396	1837	0.03668	5.426e-06	1706	TRUE	reported	NfimYF	0.3304	2	TRUE	6021	0.0111978	20.7807	0.000182323
rs2570487	A	T	A	T	-0.6437	-0.1585	0.0142	0.0241	FALSE	TRUE	FALSE	HZofiQ	0.1943	0.4147	outcome	TRUE	reported	textfile	2	104459443	1837	0.1432	7.349e-06	1706	TRUE	reported	NfimYF	0.0142	2	TRUE	6021	0.0108798	20.184	0.000411144
rs59598877	G	T	G	T	0.2314	0.0426	0.1257	0.0923	FALSE	FALSE	FALSE	HZofiQ	0.0873	0.6252	outcome	TRUE	reported	textfile	2	196505282	1837	0.05161	7.812e-06	1706	TRUE	reported	NfimYF	0.1257	2	TRUE	6021	0.0108249	20.081	0.000232119
rs7504122	T	C	T	C	-0.1806	-0.0757	0.2548	0.2524	FALSE	FALSE	FALSE	HZofiQ	0.0563	0.1792	outcome	TRUE	reported	textfile	18	10226551	1837	0.04032	7.98e-06	1706	TRUE	reported	NfimYF	0.2548	2	TRUE	6021	0.0108036	20.0411	0.0011008
rs150624416	A	G	A	G	0.4537	0.0667	0.0294	0.0313	FALSE	FALSE	FALSE	HZofiQ	0.1529	0.6626	outcome	TRUE	reported	textfile	10	57677034	1837	0.1014	8.159e-06	1706	TRUE	reported	NfimYF	0.0294	2	TRUE	6021	0.0107807	19.9981	0.000217171
rs55846026	C	T	C	T	0.3233	-0.135	0.0607	0.1027	FALSE	FALSE	FALSE	HZofiQ	0.0832	0.1048	outcome	TRUE	reported	textfile	4	130179421	1837	0.07231	8.249e-06	1706	TRUE	reported	NfimYF	0.0607	2	TRUE	6021	0.0107648	19.9683	0.00179627
rs6804241	G	A	G	A	-0.2297	-0.1191	0.1263	0.8934	FALSE	FALSE	FALSE	HZofiQ	0.0792	0.1326	outcome	TRUE	reported	textfile	3	61516583	1837	0.05138	8.259e-06	1706	TRUE	reported	NfimYF	0.1263	2	TRUE	6021	0.0107628	19.9646	0.00147763
rs9896701	G	A	G	A	0.159	0.0082	0.3481	0.4149	FALSE	FALSE	FALSE	HZofiQ	0.0506	0.8714	outcome	TRUE	reported	textfile	17	68048182	1837	0.03572	9.114e-06	1706	TRUE	reported	NfimYF	0.3481	2	TRUE	6021	0.0106709	19.7924	0.000138648
rs117430146	C	G	C	G	0.3597	-0.1199	0.0487	0.0249	FALSE	TRUE	FALSE	HZofiQ	0.1905	0.5291	outcome	TRUE	reported	textfile	22	41998660	1837	0.08117	9.888e-06	1706	TRUE	reported	NfimYF	0.0487	2	TRUE	6021	0.010577	19.6163	0.000360472
rs73165129	T	C	T	C	-1.495	-0.0434	0.0944	0.0763	FALSE	FALSE	FALSE	4ceql1	0.0948	0.6473	outcome	TRUE	reported	textfile	22	42315371	1837	0.04742	9.848e-175	1707	TRUE	reported	6MiWgk	0.0944	2	TRUE	6021	0.351098	992.856	1.04883e-141
rs146069723	T	C	T	C	-0.5625	0.3475	0.0762	0.0185	FALSE	FALSE	FALSE	4ceql1	0.2045	0.08926	outcome	TRUE	reported	textfile	22	43339331	1837	0.06459	6.779e-18	1707	TRUE	reported	6MiWgk	0.0762	2	TRUE	6021	0.0396493	75.7602	1.48414e-11
rs11090614	G	A	G	A	-0.3049	0.0349	0.2474	0.2277	FALSE	FALSE	FALSE	4ceql1	0.0631	0.5807	outcome	TRUE	reported	textfile	22	44300847	1837	0.03896	8.445e-15	1707	TRUE	reported	6MiWgk	0.2474	2	TRUE	6021	0.0322645	61.1792	5.96407e-11
rs187315152	T	A	T	A	-0.5226	-0.4784	0.0501	0.02	FALSE	TRUE	FALSE	4ceql1	0.2355	0.04223	outcome	TRUE	reported	textfile	22	41305795	1837	0.083	3.819e-10	1707	TRUE	reported	6MiWgk	0.0501	2	TRUE	6021	0.0211252	39.6013	6.49812e-06
rs150612106	A	G	A	G	-0.6961	0.3544	0.025	0.024	FALSE	FALSE	FALSE	4ceql1	0.196	0.07058	outcome	TRUE	reported	textfile	22	40175781	1837	0.1109	4.229e-10	1707	TRUE	reported	6MiWgk	0.025	2	TRUE	6021	0.0209969	39.3556	4.21644e-06
rs113530150	T	C	T	C	-0.3995	0.202	0.0806	0.044	FALSE	FALSE	FALSE	4ceql1	0.1285	0.1159	outcome	TRUE	reported	textfile	22	40567196	1837	0.06471	8.163e-10	1707	TRUE	reported	6MiWgk	0.0806	2	TRUE	6021	0.0203265	38.0731	3.74231e-06
rs139290596	G	A	G	A	-0.4589	-0.1998	0.0482	0.0165	FALSE	FALSE	FALSE	4ceql1	0.2527	0.4292	outcome	TRUE	reported	textfile	22	44349795	1837	0.07926	8.252e-09	1707	TRUE	reported	6MiWgk	0.0482	2	TRUE	6021	0.0179211	33.4854	3.01239e-06
rs11599977	A	G	A	G	0.2152	0.0056	0.2213	0.8479	FALSE	FALSE	FALSE	4ceql1	0.069	0.9348	outcome	TRUE	reported	textfile	11	38419307	1837	0.04096	1.664e-07	1707	TRUE	reported	6MiWgk	0.2213	2	TRUE	6021	0.014804	27.5735	5.42468e-06
rs57736830	G	C	G	C	-0.2361	0.023	0.1644	0.1866	FALSE	TRUE	FALSE	4ceql1	0.0691	0.7389	outcome	TRUE	reported	textfile	5	168402085	1837	0.04586	2.912e-07	1707	TRUE	reported	6MiWgk	0.1644	2	TRUE	6021	0.0142231	26.4759	1.46257e-05
rs115650989	A	G	A	G	-0.5049	0.0993	0.0299	0.0229	FALSE	FALSE	FALSE	4ceql1	0.1811	0.5836	outcome	TRUE	reported	textfile	8	145510474	1837	0.09989	4.756e-07	1707	TRUE	reported	6MiWgk	0.0299	2	TRUE	6021	0.013717	25.5208	3.34396e-05
rs117397694	A	C	A	C	-0.6104	0.3264	0.0188	0.0188	FALSE	FALSE	FALSE	4ceql1	0.1983	0.09986	outcome	TRUE	reported	textfile	12	5565515	1837	0.1256	1.287e-06	1707	TRUE	reported	6MiWgk	0.0188	2	TRUE	6021	0.0126938	23.5926	0.000562623
rs79451942	T	G	T	G	-0.5854	-0.082	0.0193	0.0215	FALSE	FALSE	FALSE	4ceql1	0.2132	0.7006	outcome	TRUE	reported	textfile	11	109330334	1837	0.123	2.108e-06	1707	TRUE	reported	6MiWgk	0.0193	2	TRUE	6021	0.0121805	22.6267	7.15435e-05
rs7504122	T	C	T	C	-0.1904	-0.0757	0.2548	0.2524	FALSE	FALSE	FALSE	4ceql1	0.0563	0.1792	outcome	TRUE	reported	textfile	18	10226551	1837	0.04034	2.551e-06	1707	TRUE	reported	6MiWgk	0.2548	2	TRUE	6021	0.0119817	22.253	0.000514896
rs35291683	A	G	A	G	0.2592	-0.0365	0.107	0.1055	FALSE	FALSE	FALSE	4ceql1	0.0813	0.6534	outcome	TRUE	reported	textfile	21	42576275	1837	0.05555	3.288e-06	1707	TRUE	reported	6MiWgk	0.107	2	TRUE	6021	0.0117132	21.7485	0.000113923
rs80241990	C	A	C	A	-0.368	-0.1735	0.0476	0.0294	FALSE	FALSE	FALSE	4ceql1	0.2285	0.4478	outcome	TRUE	reported	textfile	11	3250248	1837	0.08069	5.427e-06	1707	TRUE	reported	6MiWgk	0.0476	2	TRUE	6021	0.0111959	20.777	0.000297855
rs73451452	A	T	A	T	0.4173	0.0296	0.0362	0.0519	FALSE	TRUE	FALSE	4ceql1	0.1243	0.8115	outcome	TRUE	reported	textfile	7	137804100	1837	0.09326	8.129e-06	1707	TRUE	reported	6MiWgk	0.0362	2	TRUE	6021	0.0107817	20.0001	0.000148188
rs4689407	G	T	G	T	-0.1717	-0.0269	0.2643	0.7026	FALSE	FALSE	FALSE	4ceql1	0.053	0.6123	outcome	TRUE	reported	textfile	4	6341740	1837	0.03845	8.429e-06	1707	TRUE	reported	6MiWgk	0.2643	2	TRUE	6021	0.0107387	19.9193	0.000256164
rs1009544	C	G	C	G	-1.1	0.0377	0.1257	0.121	FALSE	TRUE	FALSE	cIks18	0.0775	0.6262	outcome	TRUE	reported	textfile	22	42239348	3656	0.03287	1e-200	1708	TRUE	reported	ThAsbv	0.1257	2	TRUE	6021	0.234493	1119.3	6.45377e-137
rs735537	G	A	G	A	0.288	-0.0705	0.4579	0.4353	FALSE	FALSE	FALSE	cIks18	0.0501	0.159	outcome	TRUE	reported	textfile	22	42812471	3656	0.02514	7.359e-30	1708	TRUE	reported	ThAsbv	0.4579	2	TRUE	6021	0.0346523	131.165	4.75245e-16
rs148646251	G	A	G	A	-0.5015	-0.5678	0.0546	0.0255	FALSE	FALSE	FALSE	cIks18	0.1893	0.002701	outcome	TRUE	reported	textfile	22	40987104	3656	0.05646	1.016e-18	1708	TRUE	reported	ThAsbv	0.0546	2	TRUE	6021	0.0211243	78.8538	2.77627e-07
rs2267408	G	C	G	C	0.2122	-0.0568	0.3498	0.3042	FALSE	TRUE	FALSE	cIks18	0.0605	0.3476	outcome	TRUE	reported	textfile	22	39758830	3656	0.02595	3.946e-16	1708	TRUE	reported	ThAsbv	0.3498	2	TRUE	6021	0.0179613	66.8311	4.82103e-09
rs13058590	T	C	T	C	-0.4017	0.0849	0.0468	0.0241	FALSE	FALSE	FALSE	cIks18	0.187	0.6499	outcome	TRUE	reported	textfile	22	39641412	3656	0.05929	1.436e-11	1708	TRUE	reported	ThAsbv	0.0468	2	TRUE	6021	0.0123998	45.8779	4.33377e-07
rs132945	A	T	A	T	-0.2482	0.0854	0.1325	0.0947	FALSE	TRUE	FALSE	cIks18	0.0866	0.3243	outcome	TRUE	reported	textfile	22	38548552	3656	0.03736	3.487e-11	1708	TRUE	reported	ThAsbv	0.1325	2	TRUE	6021	0.0119281	44.1115	3.77445e-06
rs4657041	C	T	C	T	-0.1522	-0.01	0.3342	0.5101	FALSE	FALSE	FALSE	cIks18	0.0486	0.8373	outcome	TRUE	reported	textfile	1	161478859	3656	0.02702	1.931e-08	1708	TRUE	reported	ThAsbv	0.3342	2	TRUE	6021	0.00860398	31.7118	1.63268e-05
rs148563640	T	C	T	C	0.4447	-0.0929	0.0219	0.0216	FALSE	FALSE	FALSE	cIks18	0.2536	0.7142	outcome	TRUE	reported	textfile	17	48145906	3656	0.08584	2.328e-07	1708	TRUE	reported	ThAsbv	0.0219	2	TRUE	6021	0.00728739	26.8236	0.000115264
rs141130967	G	T	G	T	-0.3241	0.3135	0.0417	0.0258	FALSE	FALSE	FALSE	cIks18	0.1916	0.1018	outcome	TRUE	reported	textfile	3	101706582	3656	0.06509	6.689e-07	1708	TRUE	reported	ThAsbv	0.0417	2	TRUE	6021	0.00673578	24.7795	0.00352927
rs72686437	A	G	A	G	0.1999	-0.0106	0.1079	0.0629	FALSE	FALSE	FALSE	cIks18	0.1072	0.9213	outcome	TRUE	reported	textfile	14	22596030	3656	0.04123	1.298e-06	1708	TRUE	reported	ThAsbv	0.1079	2	TRUE	6021	0.00638865	23.4942	0.00017042
rs117499379	C	T	C	T	0.2411	-0.0658	0.0682	0.0359	FALSE	FALSE	FALSE	cIks18	0.1866	0.7244	outcome	TRUE	reported	textfile	18	4343023	3656	0.05023	1.648e-06	1708	TRUE	reported	ThAsbv	0.0682	2	TRUE	6021	0.0062623	23.0266	0.000363588
rs72658947	C	G	C	G	-0.4269	-0.3391	0.0187	0.031	FALSE	TRUE	FALSE	cIks18	0.1764	0.0546	outcome	TRUE	reported	textfile	1	30372026	3656	0.08994	2.152e-06	1708	TRUE	reported	ThAsbv	0.0187	2	TRUE	6021	0.00612452	22.5169	0.0105079
rs114318843	C	T	C	T	-0.5242	-0.0691	0.0122	0.0315	FALSE	FALSE	FALSE	cIks18	0.1526	0.6506	outcome	TRUE	reported	textfile	2	164755835	3656	0.1126	3.324e-06	1708	TRUE	reported	ThAsbv	0.0122	2	TRUE	6021	0.0058931	21.6611	0.000698941
rs16957279	G	A	G	A	0.1238	-0.0119	0.3223	0.3652	FALSE	FALSE	FALSE	cIks18	0.0509	0.8144	outcome	TRUE	reported	textfile	15	33954227	3656	0.02691	4.4e-06	1708	TRUE	reported	ThAsbv	0.3223	2	TRUE	6021	0.00575574	21.1532	0.000498761
rs35631270	G	A	G	A	-0.1483	0.034	0.1763	0.7335	FALSE	FALSE	FALSE	cIks18	0.056	0.5436	outcome	TRUE	reported	textfile	4	80524348	3656	0.03269	5.895e-06	1708	TRUE	reported	ThAsbv	0.1763	2	TRUE	6021	0.00559768	20.5691	0.0013663
rs72805400	C	G	C	G	0.2232	0.184	0.071	0.0232	FALSE	TRUE	FALSE	cIks18	0.2011	0.36	outcome	TRUE	reported	textfile	10	77064133	3656	0.04971	7.328e-06	1708	TRUE	reported	ThAsbv	0.071	2	TRUE	6021	0.00548411	20.1495	0.00292103
rs140896553	G	A	G	A	0.2869	0.1528	0.0391	0.0219	FALSE	FALSE	FALSE	cIks18	0.1928	0.4282	outcome	TRUE	reported	textfile	22	42112437	3656	0.06442	8.722e-06	1708	TRUE	reported	ThAsbv	0.0391	2	TRUE	6021	0.0053959	19.8236	0.00250704
rs11761810	A	C	A	C	0.1125	0.0191	0.4731	0.4158	FALSE	FALSE	FALSE	cIks18	0.0511	0.7083	outcome	TRUE	reported	textfile	7	152779596	3656	0.02529	8.893e-06	1708	TRUE	reported	ThAsbv	0.4731	2	TRUE	6021	0.0053834	19.7774	0.00105383
rs10273088	G	A	G	A	-0.2113	-0.044	0.0748	0.0887	FALSE	FALSE	FALSE	cIks18	0.0927	0.6352	outcome	TRUE	reported	textfile	7	13005993	3656	0.04767	9.533e-06	1708	TRUE	reported	ThAsbv	0.0748	2	TRUE	6021	0.00534533	19.6368	0.00136811
rs1563991	T	G	T	G	0.1408	-0.0662	0.1938	0.8164	FALSE	FALSE	FALSE	cIks18	0.0639	0.3005	outcome	TRUE	reported	textfile	11	37670518	3656	0.03182	9.905e-06	1708	TRUE	reported	ThAsbv	0.1938	2	TRUE	6021	0.00532696	19.5689	0.00436766
rs1009544	C	G	C	G	-1.144	0.0377	0.1256	0.121	FALSE	TRUE	FALSE	LMq08t	0.0775	0.6262	outcome	TRUE	reported	textfile	22	42239348	3657	0.03236	1e-200	1709	TRUE	reported	xrKDZF	0.1256	2	TRUE	6021	0.254705	1249.1	2.78728e-151
rs735537	G	A	G	A	0.2877	-0.0705	0.458	0.4353	FALSE	FALSE	FALSE	LMq08t	0.0501	0.159	outcome	TRUE	reported	textfile	22	42812471	3657	0.0251	6.375e-30	1709	TRUE	reported	xrKDZF	0.458	2	TRUE	6021	0.03468	131.309	4.58469e-16
rs148646251	G	A	G	A	-0.5401	-0.5678	0.0546	0.0255	FALSE	FALSE	FALSE	LMq08t	0.1893	0.002701	outcome	TRUE	reported	textfile	22	40987104	3657	0.05629	1.503e-21	1709	TRUE	reported	xrKDZF	0.0546	2	TRUE	6021	0.0245563	92.0128	1.2478e-08
rs9611061	C	G	C	G	-0.4324	-0.1784	0.0655	0.0231	FALSE	TRUE	FALSE	LMq08t	0.2115	0.3989	outcome	TRUE	reported	textfile	22	39375623	3657	0.05205	1.365e-16	1709	TRUE	reported	xrKDZF	0.0655	2	TRUE	6021	0.0185219	68.9751	1.81956e-09
rs13058590	T	C	T	C	-0.4019	0.0849	0.0468	0.0241	FALSE	FALSE	FALSE	LMq08t	0.187	0.6499	outcome	TRUE	reported	textfile	22	39641412	3657	0.05916	1.277e-11	1709	TRUE	reported	xrKDZF	0.0468	2	TRUE	6021	0.0124626	46.1256	4.02646e-07
rs1801274	G	A	G	A	-0.1765	-0.0136	0.325	0.5096	FALSE	FALSE	FALSE	LMq08t	0.0485	0.7784	outcome	TRUE	reported	textfile	1	161479745	3657	0.02694	6.472e-11	1709	TRUE	reported	xrKDZF	0.325	2	TRUE	6021	0.0116012	42.8999	6.20247e-07
rs12170003	T	C	T	C	-0.3184	-0.0422	0.0648	0.0337	FALSE	FALSE	FALSE	LMq08t	0.1577	0.7888	outcome	TRUE	reported	textfile	22	37748690	3657	0.05086	4.291e-10	1709	TRUE	reported	xrKDZF	0.0648	2	TRUE	6021	0.0106032	39.1702	1.89573e-06
rs76015644	G	A	G	A	-0.5147	0.0957	0.0194	0.0192	FALSE	FALSE	FALSE	LMq08t	0.1953	0.6243	outcome	TRUE	reported	textfile	22	44355693	3657	0.09071	1.505e-08	1709	TRUE	reported	xrKDZF	0.0194	2	TRUE	6021	0.00872703	32.1781	3.08032e-05
rs1563991	T	G	T	G	0.1527	-0.0662	0.1937	0.8164	FALSE	FALSE	FALSE	LMq08t	0.0639	0.3005	outcome	TRUE	reported	textfile	11	37670518	3657	0.03176	1.573e-06	1709	TRUE	reported	xrKDZF	0.1937	2	TRUE	6021	0.00628139	23.1036	0.00162543
rs72658947	C	G	C	G	-0.4262	-0.3391	0.0187	0.031	FALSE	TRUE	FALSE	LMq08t	0.1764	0.0546	outcome	TRUE	reported	textfile	1	30372026	3657	0.08974	2.12e-06	1709	TRUE	reported	xrKDZF	0.0187	2	TRUE	6021	0.00612998	22.5433	0.0104509
rs6079871	T	C	T	C	-0.2411	0.2513	0.0639	0.0495	FALSE	FALSE	FALSE	LMq08t	0.1161	0.03043	outcome	TRUE	reported	textfile	20	15504410	3657	0.05099	2.361e-06	1709	TRUE	reported	xrKDZF	0.0639	2	TRUE	6021	0.00607648	22.3453	0.0166058
rs2925323	T	C	T	C	-0.1318	-0.1066	0.2923	0.3748	FALSE	FALSE	FALSE	LMq08t	0.0499	0.03272	outcome	TRUE	reported	textfile	3	101658926	3657	0.02808	2.795e-06	1709	TRUE	reported	xrKDZF	0.2923	2	TRUE	6021	0.00598829	22.0191	0.0170592
rs148563640	T	C	T	C	0.3965	-0.0929	0.0219	0.0216	FALSE	FALSE	FALSE	LMq08t	0.2536	0.7142	outcome	TRUE	reported	textfile	17	48145906	3657	0.08567	3.81e-06	1709	TRUE	reported	xrKDZF	0.0219	2	TRUE	6021	0.00582328	21.4087	0.00062264
rs146115798	T	C	T	C	0.3144	0.1833	0.0331	0.0334	FALSE	FALSE	FALSE	LMq08t	0.1495	0.2202	outcome	TRUE	reported	textfile	22	41508134	3657	0.06974	6.764e-06	1709	TRUE	reported	xrKDZF	0.0331	2	TRUE	6021	0.00552674	20.3125	0.00512985
rs35754161	T	G	T	G	-0.1137	-0.0547	0.4649	0.3544	FALSE	FALSE	FALSE	LMq08t	0.0515	0.2887	outcome	TRUE	reported	textfile	15	51655048	3657	0.02549	8.392e-06	1709	TRUE	reported	xrKDZF	0.4649	2	TRUE	6021	0.00541128	19.8858	0.00420873
rs9434824	G	A	G	A	0.1254	-0.0703	0.2734	0.7391	FALSE	FALSE	FALSE	LMq08t	0.0543	0.1954	outcome	TRUE	reported	textfile	1	7137637	3657	0.02818	8.863e-06	1709	TRUE	reported	xrKDZF	0.2734	2	TRUE	6021	0.00538571	19.7914	0.00671124
rs6680891	T	A	T	A	0.1354	-0.034	0.2122	0.3221	FALSE	TRUE	FALSE	LMq08t	0.0528	0.5194	outcome	TRUE	reported	textfile	1	164083691	3657	0.03049	9.249e-06	1709	TRUE	reported	xrKDZF	0.2122	2	TRUE	6021	0.00536367	19.7099	0.00191225
rs1009544	C	G	C	G	-1.114	0.0377	0.1256	0.121	FALSE	TRUE	FALSE	W1ZMqJ	0.0775	0.6262	outcome	TRUE	reported	textfile	22	42239348	3657	0.03255	1e-200	1710	TRUE	reported	UVwI15	0.1256	2	TRUE	6021	0.242591	1170.66	1.26605e-142
rs76140411	C	G	C	G	-0.581	0.3718	0.0768	0.0275	FALSE	TRUE	FALSE	W1ZMqJ	0.1583	0.01884	outcome	TRUE	reported	textfile	22	43213724	3657	0.04768	1.656e-33	1710	TRUE	reported	UVwI15	0.0768	2	TRUE	6021	0.0390184	148.403	5.34623e-16
rs148646251	G	A	G	A	-0.5604	-0.5678	0.0546	0.0255	FALSE	FALSE	FALSE	W1ZMqJ	0.1893	0.002701	outcome	TRUE	reported	textfile	22	40987104	3657	0.05613	3.587e-23	1710	TRUE	reported	UVwI15	0.0546	2	TRUE	6021	0.026534	99.6251	2.02326e-09
rs150612106	A	G	A	G	-0.7252	0.3544	0.0261	0.024	FALSE	FALSE	FALSE	W1ZMqJ	0.196	0.07058	outcome	TRUE	reported	textfile	22	40175781	3657	0.07811	2.737e-20	1710	TRUE	reported	UVwI15	0.0261	2	TRUE	6021	0.0230282	86.1519	6.29609e-10
rs9611061	C	G	C	G	-0.3848	-0.1784	0.0655	0.0231	FALSE	TRUE	FALSE	W1ZMqJ	0.2115	0.3989	outcome	TRUE	reported	textfile	22	39375623	3657	0.05207	1.807e-13	1710	TRUE	reported	UVwI15	0.0655	2	TRUE	6021	0.0147141	54.583	1.18581e-07
rs75737464	A	G	A	G	0.5124	0.4785	0.0204	0.0185	FALSE	FALSE	FALSE	W1ZMqJ	0.2487	0.05432	outcome	TRUE	reported	textfile	22	43126236	3657	0.08857	7.83e-09	1710	TRUE	reported	UVwI15	0.0204	2	TRUE	6021	0.00906908	33.4509	0.000742204
rs4657041	C	T	C	T	-0.1479	-0.01	0.3344	0.5101	FALSE	FALSE	FALSE	W1ZMqJ	0.0486	0.8373	outcome	TRUE	reported	textfile	1	161478859	3657	0.02692	4.176e-08	1710	TRUE	reported	UVwI15	0.3344	2	TRUE	6021	0.00818637	30.1681	2.66059e-05
rs228962	A	G	A	G	0.2404	0.1378	0.0738	0.9509	FALSE	FALSE	FALSE	W1ZMqJ	0.1454	0.3432	outcome	TRUE	reported	textfile	22	37535494	3657	0.04745	4.251e-07	1710	TRUE	reported	UVwI15	0.0738	2	TRUE	6021	0.00697002	25.6542	0.000652712
rs2939924	T	C	T	C	0.1234	0.0047	0.3273	0.4883	FALSE	FALSE	FALSE	W1ZMqJ	0.0488	0.9228	outcome	TRUE	reported	textfile	10	132491701	3657	0.02657	3.549e-06	1710	TRUE	reported	UVwI15	0.3273	2	TRUE	6021	0.00586365	21.5581	0.000318005
rs73176684	C	T	C	T	0.2426	0.0658	0.0595	0.0494	FALSE	FALSE	FALSE	W1ZMqJ	0.1185	0.5787	outcome	TRUE	reported	textfile	22	41778617	3657	0.05244	3.853e-06	1710	TRUE	reported	UVwI15	0.0595	2	TRUE	6021	0.00581831	21.3904	0.000953603
rs7684683	T	G	T	G	-0.1485	0.0383	0.1812	0.7502	FALSE	FALSE	FALSE	W1ZMqJ	0.0569	0.5008	outcome	TRUE	reported	textfile	4	80423021	3657	0.03211	3.864e-06	1710	TRUE	reported	UVwI15	0.1812	2	TRUE	6021	0.00581453	21.3764	0.00123677
rs9869373	T	C	T	C	-0.1287	-0.0962	0.2896	0.3772	FALSE	FALSE	FALSE	W1ZMqJ	0.0497	0.05288	outcome	TRUE	reported	textfile	3	101645001	3657	0.02827	5.457e-06	1710	TRUE	reported	UVwI15	0.2896	2	TRUE	6021	0.00563542	20.7142	0.0164997
rs4467081	G	A	G	A	-0.1151	0.0299	0.4945	0.5731	FALSE	FALSE	FALSE	W1ZMqJ	0.0497	0.5469	outcome	TRUE	reported	textfile	16	25853127	3657	0.02532	5.666e-06	1710	TRUE	reported	UVwI15	0.4945	2	TRUE	6021	0.0056189	20.6531	0.00131749
rs62238186	T	C	T	C	0.3585	-0.1392	0.0283	0.0152	FALSE	FALSE	FALSE	W1ZMqJ	0.2533	0.5828	outcome	TRUE	reported	textfile	22	41778714	3657	0.07894	5.786e-06	1710	TRUE	reported	UVwI15	0.0283	2	TRUE	6021	0.00560811	20.6133	0.00119242
rs6680891	T	A	T	A	0.1376	-0.034	0.2122	0.3221	FALSE	TRUE	FALSE	W1ZMqJ	0.0528	0.5194	outcome	TRUE	reported	textfile	1	164083691	3657	0.03043	6.31e-06	1710	TRUE	reported	UVwI15	0.2122	2	TRUE	6021	0.00556015	20.436	0.0015387
rs2861184	T	C	T	C	0.1526	0.0063	0.1639	0.881	FALSE	FALSE	FALSE	W1ZMqJ	0.0767	0.935	outcome	TRUE	reported	textfile	11	38422885	3657	0.03412	7.969e-06	1710	TRUE	reported	UVwI15	0.1639	2	TRUE	6021	0.00543998	19.9919	0.000513329
rs5750432	T	C	T	C	-0.187	-0.1064	0.0946	0.8979	FALSE	FALSE	FALSE	W1ZMqJ	0.0848	0.2096	outcome	TRUE	reported	textfile	22	22402940	3657	0.04188	8.277e-06	1710	TRUE	reported	UVwI15	0.0946	2	TRUE	6021	0.0054223	19.9266	0.00600839
rs11083093	A	G	A	G	-0.4613	-0.0637	0.0144	0.0251	FALSE	FALSE	FALSE	W1ZMqJ	0.1908	0.7383	outcome	TRUE	reported	textfile	18	22393283	3657	0.1036	8.797e-06	1710	TRUE	reported	UVwI15	0.0144	2	TRUE	6021	0.0053923	19.8157	0.000954977
rs1009544	C	G	C	G	-1.109	0.0377	0.1256	0.121	FALSE	TRUE	FALSE	jmk6uQ	0.0775	0.6262	outcome	TRUE	reported	textfile	22	42239348	3657	0.03251	1e-200	1711	TRUE	reported	OQ2mU3	0.1256	2	TRUE	6021	0.241391	1163.03	8.89894e-142
rs76140411	C	G	C	G	-0.5729	0.3718	0.0768	0.0275	FALSE	TRUE	FALSE	jmk6uQ	0.1583	0.01884	outcome	TRUE	reported	textfile	22	43213724	3657	0.04755	8.096e-33	1711	TRUE	reported	OQ2mU3	0.0768	2	TRUE	6021	0.0381791	145.084	1.27085e-15
rs148646251	G	A	G	A	-0.5529	-0.5678	0.0546	0.0255	FALSE	FALSE	FALSE	jmk6uQ	0.1893	0.002701	outcome	TRUE	reported	textfile	22	40987104	3657	0.056	1.043e-22	1711	TRUE	reported	OQ2mU3	0.0546	2	TRUE	6021	0.0259637	97.427	3.4266e-09
rs150612106	A	G	A	G	-0.725	0.3544	0.0261	0.024	FALSE	FALSE	FALSE	jmk6uQ	0.196	0.07058	outcome	TRUE	reported	textfile	22	40175781	3657	0.07793	2.288e-20	1711	TRUE	reported	OQ2mU3	0.0261	2	TRUE	6021	0.0231197	86.5026	5.73487e-10
rs9611061	C	G	C	G	-0.4005	-0.1784	0.0655	0.0231	FALSE	TRUE	FALSE	jmk6uQ	0.2115	0.3989	outcome	TRUE	reported	textfile	22	39375623	3657	0.05189	1.508e-14	1711	TRUE	reported	OQ2mU3	0.0655	2	TRUE	6021	0.0160286	59.5388	2.8158e-08
rs75737464	A	G	A	G	0.499	0.4785	0.0204	0.0185	FALSE	FALSE	FALSE	jmk6uQ	0.2487	0.05432	outcome	TRUE	reported	textfile	22	43126236	3657	0.08839	1.776e-08	1711	TRUE	reported	OQ2mU3	0.0204	2	TRUE	6021	0.00863975	31.8535	0.00109964
rs4657041	C	T	C	T	-0.1503	-0.01	0.3344	0.5101	FALSE	FALSE	FALSE	jmk6uQ	0.0486	0.8373	outcome	TRUE	reported	textfile	1	161478859	3657	0.02684	2.289e-08	1711	TRUE	reported	OQ2mU3	0.3344	2	TRUE	6021	0.00850198	31.3412	1.83714e-05
rs2939924	T	C	T	C	0.1334	0.0047	0.3273	0.4883	FALSE	FALSE	FALSE	jmk6uQ	0.0488	0.9228	outcome	TRUE	reported	textfile	10	132491701	3657	0.02649	5.041e-07	1711	TRUE	reported	OQ2mU3	0.3273	2	TRUE	6021	0.00688686	25.346	9.30698e-05
rs228962	A	G	A	G	0.2296	0.1378	0.0738	0.9509	FALSE	FALSE	FALSE	jmk6uQ	0.1454	0.3432	outcome	TRUE	reported	textfile	22	37535494	3657	0.04736	1.297e-06	1711	TRUE	reported	OQ2mU3	0.0738	2	TRUE	6021	0.00638577	23.49	0.00120783
rs73176684	C	T	C	T	0.2507	0.0658	0.0595	0.0494	FALSE	FALSE	FALSE	jmk6uQ	0.1185	0.5787	outcome	TRUE	reported	textfile	22	41778617	3657	0.05232	1.722e-06	1711	TRUE	reported	OQ2mU3	0.0595	2	TRUE	6021	0.00623922	22.9475	0.000594862
rs2925323	T	C	T	C	-0.1311	-0.1066	0.2923	0.3748	FALSE	FALSE	FALSE	jmk6uQ	0.0499	0.03272	outcome	TRUE	reported	textfile	3	101658926	3657	0.02795	2.848e-06	1711	TRUE	reported	OQ2mU3	0.2923	2	TRUE	6021	0.00598015	21.9889	0.0171767
rs62238186	T	C	T	C	0.3609	-0.1392	0.0283	0.0152	FALSE	FALSE	FALSE	jmk6uQ	0.2533	0.5828	outcome	TRUE	reported	textfile	22	41778714	3657	0.07878	4.782e-06	1711	TRUE	reported	OQ2mU3	0.0283	2	TRUE	6021	0.005706	20.9751	0.00106827
rs2789845	T	C	T	C	-0.2058	-0.0234	0.0785	0.8979	FALSE	FALSE	FALSE	jmk6uQ	0.0853	0.7836	outcome	TRUE	reported	textfile	9	136799915	3657	0.04551	6.297e-06	1711	TRUE	reported	OQ2mU3	0.0785	2	TRUE	6021	0.00556071	20.4381	0.000687232
rs2861184	T	C	T	C	0.1519	0.0063	0.1639	0.881	FALSE	FALSE	FALSE	jmk6uQ	0.0767	0.935	outcome	TRUE	reported	textfile	11	38422885	3657	0.03403	8.308e-06	1711	TRUE	reported	OQ2mU3	0.1639	2	TRUE	6021	0.00541885	19.9138	0.00052664
rs1009544	C	G	C	G	-1.157	0.0377	0.1256	0.121	FALSE	TRUE	FALSE	4hHLUK	0.0775	0.6262	outcome	TRUE	reported	textfile	22	42239348	3657	0.03214	1e-200	1712	TRUE	reported	z8IPcS	0.1256	2	TRUE	6021	0.261646	1295.2	2.51197e-156
rs74481199	A	G	A	G	-0.6178	0.3711	0.0774	0.0273	FALSE	FALSE	FALSE	4hHLUK	0.1601	0.02044	outcome	TRUE	reported	textfile	22	43189335	3657	0.04695	1.144e-38	1712	TRUE	reported	z8IPcS	0.0774	2	TRUE	6021	0.0452073	173.056	7.08498e-19
rs148646251	G	A	G	A	-0.5482	-0.5678	0.0546	0.0255	FALSE	FALSE	FALSE	4hHLUK	0.1893	0.002701	outcome	TRUE	reported	textfile	22	40987104	3657	0.05621	3.305e-22	1712	TRUE	reported	z8IPcS	0.0546	2	TRUE	6021	0.0253498	95.0634	6.03e-09
rs5996172	A	T	A	T	-0.2488	-0.0771	0.3656	0.3193	FALSE	TRUE	FALSE	4hHLUK	0.065	0.2354	outcome	TRUE	reported	textfile	22	42872128	3657	0.02624	4.402e-21	1712	TRUE	reported	z8IPcS	0.3656	2	TRUE	6021	0.0239939	89.8536	1.83145e-11
rs76146864	T	C	T	C	-0.7003	0.2468	0.0264	0.0262	FALSE	FALSE	FALSE	4hHLUK	0.181	0.1727	outcome	TRUE	reported	textfile	22	40246055	3657	0.07762	2.897e-19	1712	TRUE	reported	z8IPcS	0.0264	2	TRUE	6021	0.0217739	81.3548	4.06293e-10
rs73169364	A	G	A	G	0.3467	-0.0404	0.0407	0.0326	FALSE	FALSE	FALSE	4hHLUK	0.1514	0.7897	outcome	TRUE	reported	textfile	22	39982756	3657	0.06242	2.971e-08	1712	TRUE	reported	z8IPcS	0.0407	2	TRUE	6021	0.0083654	30.8335	2.54794e-05
rs4657041	C	T	C	T	-0.1395	-0.01	0.3344	0.5101	FALSE	FALSE	FALSE	4hHLUK	0.0486	0.8373	outcome	TRUE	reported	textfile	1	161478859	3657	0.02696	2.397e-07	1712	TRUE	reported	z8IPcS	0.3344	2	TRUE	6021	0.00726801	26.7591	7.83019e-05
rs62238186	T	C	T	C	0.3823	-0.1392	0.0283	0.0152	FALSE	FALSE	FALSE	4hHLUK	0.2533	0.5828	outcome	TRUE	reported	textfile	22	41778714	3657	0.0789	1.317e-06	1712	TRUE	reported	z8IPcS	0.0283	2	TRUE	6021	0.00637897	23.4648	0.000501991
rs56020760	T	C	T	C	-0.2358	0.1212	0.0607	0.0712	FALSE	FALSE	FALSE	4hHLUK	0.0968	0.2108	outcome	TRUE	reported	textfile	10	72391681	3657	0.05233	6.823e-06	1712	TRUE	reported	z8IPcS	0.0607	2	TRUE	6021	0.00552149	20.2931	0.0054174
rs76400748	A	G	A	G	0.3784	-0.0553	0.0213	0.0462	FALSE	FALSE	FALSE	4hHLUK	0.1266	0.6622	outcome	TRUE	reported	textfile	11	131814009	3657	0.08472	8.191e-06	1712	TRUE	reported	z8IPcS	0.0213	2	TRUE	6021	0.00542554	19.9385	0.00114989
rs61879160	T	C	T	C	0.1688	-0.1296	0.1303	0.1321	FALSE	FALSE	FALSE	4hHLUK	0.0759	0.08795	outcome	TRUE	reported	textfile	11	622044	3657	0.03805	9.417e-06	1712	TRUE	reported	z8IPcS	0.1303	2	TRUE	6021	0.00535278	19.6697	0.0144299
rs73165129	T	C	T	C	-0.5288	-0.0434	0.0991	0.0763	FALSE	FALSE	FALSE	POnxaV	0.0948	0.6473	outcome	TRUE	reported	textfile	22	42315371	3659	0.04055	4.962e-38	1713	TRUE	reported	8cZHN3	0.0991	2	TRUE	6021	0.0444129	169.967	3.25545e-23
rs4822134	C	T	C	T	0.1467	0.0108	0.4057	0.4145	FALSE	FALSE	FALSE	POnxaV	0.0497	0.8272	outcome	TRUE	reported	textfile	22	42867332	3659	0.02525	6.782e-09	1713	TRUE	reported	8cZHN3	0.4057	2	TRUE	6021	0.00914086	33.7365	8.94733e-06
rs149192849	C	T	C	T	-0.3114	0.1744	0.0536	0.0273	FALSE	FALSE	FALSE	POnxaV	0.1693	0.3029	outcome	TRUE	reported	textfile	22	42270864	3659	0.0547	1.349e-08	1713	TRUE	reported	8cZHN3	0.0536	2	TRUE	6021	0.00877951	32.3911	0.00011828
rs146069723	T	C	T	C	-0.2315	0.3475	0.0756	0.0185	FALSE	FALSE	FALSE	POnxaV	0.2045	0.08926	outcome	TRUE	reported	textfile	22	43339331	3659	0.04704	8.994e-07	1713	TRUE	reported	8cZHN3	0.0756	2	TRUE	6021	0.00657567	24.2064	0.00462138
rs73269620	C	T	C	T	-0.1197	0.0011	0.3773	0.2756	FALSE	FALSE	FALSE	POnxaV	0.0556	0.9842	outcome	TRUE	reported	textfile	7	13273064	3659	0.025	1.742e-06	1713	TRUE	reported	8cZHN3	0.3773	2	TRUE	6021	0.00622635	22.9124	0.000170062
rs17828306	G	A	G	A	0.1256	0.085	0.315	0.2929	FALSE	FALSE	FALSE	POnxaV	0.0538	0.1142	outcome	TRUE	reported	textfile	4	62162828	3659	0.02658	2.37e-06	1713	TRUE	reported	8cZHN3	0.315	2	TRUE	6021	0.00606547	22.3168	0.00593087
rs2479085	C	T	C	T	-0.1772	0.009	0.1271	0.0783	FALSE	FALSE	FALSE	POnxaV	0.0971	0.9261	outcome	TRUE	reported	textfile	1	15667443	3659	0.03766	2.621e-06	1713	TRUE	reported	8cZHN3	0.1271	2	TRUE	6021	0.00601429	22.1273	0.000262326
rs139784925	T	C	T	C	-0.2552	-0.4536	0.0571	0.023	FALSE	FALSE	FALSE	POnxaV	0.2056	0.02738	outcome	TRUE	reported	textfile	22	41079533	3659	0.05474	3.23e-06	1713	TRUE	reported	8cZHN3	0.0571	2	TRUE	6021	0.00590496	21.7227	0.0205079
rs561920	C	T	C	T	0.1358	0.012	0.221	0.2085	FALSE	FALSE	FALSE	POnxaV	0.0608	0.8434	outcome	TRUE	reported	textfile	20	922125	3659	0.02955	4.494e-06	1713	TRUE	reported	8cZHN3	0.221	2	TRUE	6021	0.00573882	21.108	0.0004664
rs17878304	T	C	T	C	-0.3061	-0.0183	0.0343	0.0774	FALSE	FALSE	FALSE	POnxaV	0.0948	0.8469	outcome	TRUE	reported	textfile	19	4956161	3659	0.06694	4.98e-06	1713	TRUE	reported	8cZHN3	0.0343	2	TRUE	6021	0.00568222	20.8986	0.000493904
rs147645513	T	C	T	C	-0.4405	-0.0946	0.0172	0.0154	FALSE	FALSE	FALSE	POnxaV	0.2747	0.7306	outcome	TRUE	reported	textfile	7	32376606	3659	0.09644	5.093e-06	1713	TRUE	reported	8cZHN3	0.0172	2	TRUE	6021	0.00566951	20.8516	0.000706696
rs66717547	A	G	A	G	0.5147	0.1849	0.0118	0.0541	FALSE	FALSE	FALSE	POnxaV	0.1213	0.1275	outcome	TRUE	reported	textfile	8	122963696	3659	0.1128	5.196e-06	1713	TRUE	reported	8cZHN3	0.0118	2	TRUE	6021	0.00565801	20.8091	0.00785948
rs643428	T	C	T	C	0.1106	0.0261	0.4759	0.5782	FALSE	FALSE	FALSE	POnxaV	0.05	0.6012	outcome	TRUE	reported	textfile	1	54728858	3659	0.02456	6.906e-06	1713	TRUE	reported	8cZHN3	0.4759	2	TRUE	6021	0.00551177	20.2682	0.00125017
rs79868028	A	G	A	G	0.1897	0.094	0.0935	0.1081	FALSE	FALSE	FALSE	POnxaV	0.0832	0.2586	outcome	TRUE	reported	textfile	10	133645848	3659	0.04254	8.441e-06	1713	TRUE	reported	8cZHN3	0.0935	2	TRUE	6021	0.00540534	19.8748	0.0048168
rs10071113	A	G	A	G	0.1861	0.012	0.0925	0.0897	FALSE	FALSE	FALSE	POnxaV	0.0865	0.8895	outcome	TRUE	reported	textfile	5	178512644	3659	0.04188	9.117e-06	1713	TRUE	reported	8cZHN3	0.0925	2	TRUE	6021	0.00536759	19.7352	0.000635729
rs1009544	C	G	C	G	-1.142	0.0377	0.1256	0.121	FALSE	TRUE	FALSE	sNZ7h6	0.0775	0.6262	outcome	TRUE	reported	textfile	22	42239348	3657	0.03246	1e-200	1714	TRUE	reported	QGBaqG	0.1256	2	TRUE	6021	0.252874	1237.08	5.83352e-150
rs74481199	A	G	A	G	-0.5735	0.3711	0.0774	0.0273	FALSE	FALSE	FALSE	sNZ7h6	0.1601	0.02044	outcome	TRUE	reported	textfile	22	43189335	3657	0.04722	2.678e-33	1714	TRUE	reported	QGBaqG	0.0774	2	TRUE	6021	0.0387718	147.427	5.90594e-16
rs148646251	G	A	G	A	-0.5304	-0.5678	0.0546	0.0255	FALSE	FALSE	FALSE	sNZ7h6	0.1893	0.002701	outcome	TRUE	reported	textfile	22	40987104	3657	0.05645	9.681e-21	1714	TRUE	reported	QGBaqG	0.0546	2	TRUE	6021	0.0235719	88.2351	3.0596e-08
rs150612106	A	G	A	G	-0.7012	0.3544	0.0261	0.024	FALSE	FALSE	FALSE	sNZ7h6	0.196	0.07058	outcome	TRUE	reported	textfile	22	40175781	3657	0.0785	6.423e-19	1714	TRUE	reported	QGBaqG	0.0261	2	TRUE	6021	0.0213524	79.7456	3.45399e-09
rs9611061	C	G	C	G	-0.4123	-0.1784	0.0655	0.0231	FALSE	TRUE	FALSE	sNZ7h6	0.2115	0.3989	outcome	TRUE	reported	textfile	22	39375623	3657	0.05223	3.865e-15	1714	TRUE	reported	QGBaqG	0.0655	2	TRUE	6021	0.0167542	62.2801	1.27086e-08
rs4657041	C	T	C	T	-0.1739	-0.01	0.3344	0.5101	FALSE	FALSE	FALSE	sNZ7h6	0.0486	0.8373	outcome	TRUE	reported	textfile	1	161478859	3657	0.02699	1.311e-10	1714	TRUE	reported	QGBaqG	0.3344	2	TRUE	6021	0.0112245	41.4912	7.59001e-07
rs76015644	G	A	G	A	-0.5438	0.0957	0.0194	0.0192	FALSE	FALSE	FALSE	sNZ7h6	0.1953	0.6243	outcome	TRUE	reported	textfile	22	44355693	3657	0.09082	2.333e-09	1714	TRUE	reported	QGBaqG	0.0194	2	TRUE	6021	0.00970853	35.8326	1.0167e-05
rs6000850	C	T	C	T	0.5112	0.2443	0.0194	0.9557	FALSE	FALSE	FALSE	sNZ7h6	0.1362	0.07299	outcome	TRUE	reported	textfile	22	38032090	3657	0.09208	3.035e-08	1714	TRUE	reported	QGBaqG	0.0194	2	TRUE	6021	0.00835759	30.8045	0.00107486
rs73176684	C	T	C	T	0.2629	0.0658	0.0595	0.0494	FALSE	FALSE	FALSE	sNZ7h6	0.1185	0.5787	outcome	TRUE	reported	textfile	22	41778617	3657	0.05263	6.18e-07	1714	TRUE	reported	QGBaqG	0.0595	2	TRUE	6021	0.00677698	24.9389	0.000325655
rs6079871	T	C	T	C	-0.235	0.2513	0.0639	0.0495	FALSE	FALSE	FALSE	sNZ7h6	0.1161	0.03043	outcome	TRUE	reported	textfile	20	15504410	3657	0.05108	4.367e-06	1714	TRUE	reported	QGBaqG	0.0639	2	TRUE	6021	0.00575443	21.1542	0.0217409
rs10902206	C	T	C	T	-0.1336	0.0056	0.2536	0.2315	FALSE	FALSE	FALSE	sNZ7h6	0.06	0.9251	outcome	TRUE	reported	textfile	11	726581	3657	0.02906	4.433e-06	1714	TRUE	reported	QGBaqG	0.2536	2	TRUE	6021	0.00574637	21.1244	0.000363743
rs9434824	G	A	G	A	0.1265	-0.0703	0.2734	0.7391	FALSE	FALSE	FALSE	sNZ7h6	0.0543	0.1954	outcome	TRUE	reported	textfile	1	7137637	3657	0.02825	7.737e-06	1714	TRUE	reported	QGBaqG	0.2734	2	TRUE	6021	0.00545311	20.0404	0.00627991
rs2925323	T	C	T	C	-0.126	-0.1066	0.2923	0.3748	FALSE	FALSE	FALSE	sNZ7h6	0.0499	0.03272	outcome	TRUE	reported	textfile	3	101658926	3657	0.02815	7.81e-06	1714	TRUE	reported	QGBaqG	0.2923	2	TRUE	6021	0.00544862	20.0238	0.026814
rs1009544	C	G	C	G	-1.158	0.0377	0.1256	0.121	FALSE	TRUE	FALSE	8d06iD	0.0775	0.6262	outcome	TRUE	reported	textfile	22	42239348	3657	0.0322	1e-200	1715	TRUE	reported	YiJ3GB	0.1256	2	TRUE	6021	0.26126	1292.61	4.81632e-156
rs74481199	A	G	A	G	-0.5661	0.3711	0.0774	0.0273	FALSE	FALSE	FALSE	8d06iD	0.1601	0.02044	outcome	TRUE	reported	textfile	22	43189335	3657	0.04711	1.195e-32	1715	TRUE	reported	YiJ3GB	0.0774	2	TRUE	6021	0.0379854	144.319	1.33102e-15
rs139784925	T	C	T	C	-0.5315	-0.4536	0.0572	0.023	FALSE	FALSE	FALSE	8d06iD	0.2056	0.02738	outcome	TRUE	reported	textfile	22	41079533	3657	0.05549	1.776e-21	1715	TRUE	reported	YiJ3GB	0.0572	2	TRUE	6021	0.0244732	91.6937	6.94475e-10
rs150612106	A	G	A	G	-0.7124	0.3544	0.0261	0.024	FALSE	FALSE	FALSE	8d06iD	0.196	0.07058	outcome	TRUE	reported	textfile	22	40175781	3657	0.07827	1.421e-19	1715	TRUE	reported	YiJ3GB	0.0261	2	TRUE	6021	0.0221515	82.7979	1.53617e-09
rs9611061	C	G	C	G	-0.4155	-0.1784	0.0655	0.0231	FALSE	TRUE	FALSE	8d06iD	0.2115	0.3989	outcome	TRUE	reported	textfile	22	39375623	3657	0.05208	1.975e-15	1715	TRUE	reported	YiJ3GB	0.0655	2	TRUE	6021	0.0171073	63.6154	8.62501e-09
rs76015644	G	A	G	A	-0.537	0.0957	0.0194	0.0192	FALSE	FALSE	FALSE	8d06iD	0.1953	0.6243	outcome	TRUE	reported	textfile	22	44355693	3657	0.09061	3.371e-09	1715	TRUE	reported	YiJ3GB	0.0194	2	TRUE	6021	0.00951306	35.1042	1.26786e-05
rs6000850	C	T	C	T	0.5197	0.2443	0.0194	0.9557	FALSE	FALSE	FALSE	8d06iD	0.1362	0.07299	outcome	TRUE	reported	textfile	22	38032090	3657	0.09182	1.629e-08	1715	TRUE	reported	YiJ3GB	0.0194	2	TRUE	6021	0.00868396	32.0179	0.000793055
rs73176684	C	T	C	T	0.29	0.0658	0.0595	0.0494	FALSE	FALSE	FALSE	8d06iD	0.1185	0.5787	outcome	TRUE	reported	textfile	22	41778617	3657	0.05246	3.469e-08	1715	TRUE	reported	YiJ3GB	0.0595	2	TRUE	6021	0.00828706	30.5423	6.00542e-05
rs1801274	G	A	G	A	-0.1424	-0.0136	0.325	0.5096	FALSE	FALSE	FALSE	8d06iD	0.0485	0.7784	outcome	TRUE	reported	textfile	1	161479745	3657	0.02699	1.393e-07	1715	TRUE	reported	YiJ3GB	0.325	2	TRUE	6021	0.00755433	27.8212	6.78883e-05
rs56020760	T	C	T	C	-0.2417	0.1212	0.0607	0.0712	FALSE	FALSE	FALSE	8d06iD	0.0968	0.2108	outcome	TRUE	reported	textfile	10	72391681	3657	0.05241	4.119e-06	1715	TRUE	reported	YiJ3GB	0.0607	2	TRUE	6021	0.00578205	21.2563	0.00418022
rs6680891	T	A	T	A	0.1397	-0.034	0.2122	0.3221	FALSE	TRUE	FALSE	8d06iD	0.0528	0.5194	outcome	TRUE	reported	textfile	1	164083691	3657	0.03047	4.666e-06	1715	TRUE	reported	YiJ3GB	0.2122	2	TRUE	6021	0.00571523	21.0092	0.00129621
rs2925323	T	C	T	C	-0.1275	-0.1066	0.2923	0.3748	FALSE	FALSE	FALSE	8d06iD	0.0499	0.03272	outcome	TRUE	reported	textfile	3	101658926	3657	0.02807	5.749e-06	1715	TRUE	reported	YiJ3GB	0.2923	2	TRUE	6021	0.00561006	20.6204	0.0234344
rs72658947	C	G	C	G	-0.3992	-0.3391	0.0187	0.031	FALSE	TRUE	FALSE	8d06iD	0.1764	0.0546	outcome	TRUE	reported	textfile	1	30372026	3657	0.08971	8.868e-06	1715	TRUE	reported	YiJ3GB	0.0187	2	TRUE	6021	0.00538554	19.7907	0.0200664
rs1009544	C	G	C	G	-1.13	0.0377	0.1256	0.121	FALSE	TRUE	FALSE	w3ngiL	0.0775	0.6262	outcome	TRUE	reported	textfile	22	42239348	3657	0.03256	1e-200	1716	TRUE	reported	8CtPJU	0.1256	2	TRUE	6021	0.247755	1203.79	2.72111e-146
rs735537	G	A	G	A	0.2824	-0.0705	0.458	0.4353	FALSE	FALSE	FALSE	w3ngiL	0.0501	0.159	outcome	TRUE	reported	textfile	22	42812471	3657	0.02516	8.917e-29	1716	TRUE	reported	8CtPJU	0.458	2	TRUE	6021	0.0333023	125.913	2.06221e-15
rs148646251	G	A	G	A	-0.5419	-0.5678	0.0546	0.0255	FALSE	FALSE	FALSE	w3ngiL	0.1893	0.002701	outcome	TRUE	reported	textfile	22	40987104	3657	0.05637	1.275e-21	1716	TRUE	reported	8CtPJU	0.0546	2	TRUE	6021	0.0246478	92.3644	1.14763e-08
rs9611061	C	G	C	G	-0.4241	-0.1784	0.0655	0.0231	FALSE	TRUE	FALSE	w3ngiL	0.2115	0.3989	outcome	TRUE	reported	textfile	22	39375623	3657	0.05216	5.804e-16	1716	TRUE	reported	8CtPJU	0.0655	2	TRUE	6021	0.0177564	66.073	4.22593e-09
rs1801274	G	A	G	A	-0.1866	-0.0136	0.325	0.5096	FALSE	FALSE	FALSE	w3ngiL	0.0485	0.7784	outcome	TRUE	reported	textfile	1	161479745	3657	0.02696	5.252e-12	1716	TRUE	reported	8CtPJU	0.325	2	TRUE	6021	0.0129302	47.8791	1.33014e-07
rs13058590	T	C	T	C	-0.3979	0.0849	0.0468	0.0241	FALSE	FALSE	FALSE	w3ngiL	0.187	0.6499	outcome	TRUE	reported	textfile	22	39641412	3657	0.05925	2.166e-11	1716	TRUE	reported	8CtPJU	0.0468	2	TRUE	6021	0.0121821	45.0748	5.53716e-07
rs12170003	T	C	T	C	-0.3238	-0.0422	0.0648	0.0337	FALSE	FALSE	FALSE	w3ngiL	0.1577	0.7888	outcome	TRUE	reported	textfile	22	37748690	3657	0.05092	2.282e-10	1716	TRUE	reported	8CtPJU	0.0648	2	TRUE	6021	0.0109364	40.4147	1.28775e-06
rs76015644	G	A	G	A	-0.4946	0.0957	0.0194	0.0192	FALSE	FALSE	FALSE	w3ngiL	0.1953	0.6243	outcome	TRUE	reported	textfile	22	44355693	3657	0.09086	5.554e-08	1716	TRUE	reported	8CtPJU	0.0194	2	TRUE	6021	0.00803772	29.6159	6.70983e-05
rs1563991	T	G	T	G	0.1507	-0.0662	0.1937	0.8164	FALSE	FALSE	FALSE	w3ngiL	0.0639	0.3005	outcome	TRUE	reported	textfile	11	37670518	3657	0.03181	2.237e-06	1716	TRUE	reported	8CtPJU	0.1937	2	TRUE	6021	0.00609982	22.4317	0.00196198
rs6680891	T	A	T	A	0.1445	-0.034	0.2122	0.3221	FALSE	TRUE	FALSE	w3ngiL	0.0528	0.5194	outcome	TRUE	reported	textfile	1	164083691	3657	0.03052	2.301e-06	1716	TRUE	reported	8CtPJU	0.2122	2	TRUE	6021	0.00609239	22.4042	0.000854265
rs148563640	T	C	T	C	0.3942	-0.0929	0.0219	0.0216	FALSE	FALSE	FALSE	w3ngiL	0.2536	0.7142	outcome	TRUE	reported	textfile	17	48145906	3657	0.08577	4.451e-06	1716	TRUE	reported	8CtPJU	0.0219	2	TRUE	6021	0.00574296	21.1118	0.000683225
rs72658947	C	G	C	G	-0.412	-0.3391	0.0187	0.031	FALSE	TRUE	FALSE	w3ngiL	0.1764	0.0546	outcome	TRUE	reported	textfile	1	30372026	3657	0.08987	4.699e-06	1716	TRUE	reported	8CtPJU	0.0187	2	TRUE	6021	0.00571414	21.0052	0.0150617
rs2925323	T	C	T	C	-0.1289	-0.1066	0.2923	0.3748	FALSE	FALSE	FALSE	w3ngiL	0.0499	0.03272	outcome	TRUE	reported	textfile	3	101658926	3657	0.02812	4.763e-06	1716	TRUE	reported	8CtPJU	0.2923	2	TRUE	6021	0.00571297	21.0009	0.0215004
rs12529650	T	G	T	G	0.1188	0.0192	0.3253	0.34	FALSE	FALSE	FALSE	w3ngiL	0.052	0.7117	outcome	TRUE	reported	textfile	6	1751206	3657	0.02631	6.546e-06	1716	TRUE	reported	8CtPJU	0.3253	2	TRUE	6021	0.00554436	20.3776	0.000865241
rs116674320	A	G	A	G	0.2548	0.0726	0.0509	0.0823	FALSE	FALSE	FALSE	w3ngiL	0.0948	0.4436	outcome	TRUE	reported	textfile	19	33884065	3657	0.05676	7.411e-06	1716	TRUE	reported	8CtPJU	0.0509	2	TRUE	6021	0.00548028	20.1408	0.0021651
rs149153670	C	T	C	T	-0.539	0.0894	0.0118	0.0383	FALSE	FALSE	FALSE	w3ngiL	0.1469	0.5428	outcome	TRUE	reported	textfile	2	142280835	3657	0.1201	7.405e-06	1716	TRUE	reported	8CtPJU	0.0118	2	TRUE	6021	0.00547748	20.1305	0.00156511
rs56020760	T	C	T	C	-0.2331	0.1212	0.0607	0.0712	FALSE	FALSE	FALSE	w3ngiL	0.0968	0.2108	outcome	TRUE	reported	textfile	10	72391681	3657	0.05252	9.3e-06	1716	TRUE	reported	8CtPJU	0.0607	2	TRUE	6021	0.00535768	19.6878	0.00637488
rs35226928	A	C	A	C	0.509	-0.0103	0.0129	0.0257	FALSE	FALSE	FALSE	w3ngiL	0.1688	0.9514	outcome	TRUE	reported	textfile	14	33787067	3657	0.1148	9.459e-06	1716	TRUE	reported	8CtPJU	0.0129	2	TRUE	6021	0.00534686	19.6478	0.000547685
rs1009544	C	G	C	G	-1.167	0.0377	0.1256	0.121	FALSE	TRUE	FALSE	dcILJj	0.0775	0.6262	outcome	TRUE	reported	textfile	22	42239348	3657	0.03212	1e-200	1717	TRUE	reported	J5eO2h	0.1256	2	TRUE	6021	0.265228	1319.33	5.9165e-159
rs74481199	A	G	A	G	-0.5625	0.3711	0.0774	0.0273	FALSE	FALSE	FALSE	dcILJj	0.1601	0.02044	outcome	TRUE	reported	textfile	22	43189335	3657	0.04713	3.088e-32	1717	TRUE	reported	J5eO2h	0.0774	2	TRUE	6021	0.0374912	142.368	2.21544e-15
rs139784925	T	C	T	C	-0.5244	-0.4536	0.0572	0.023	FALSE	FALSE	FALSE	dcILJj	0.2056	0.02738	outcome	TRUE	reported	textfile	22	41079533	3657	0.05552	6.175e-21	1717	TRUE	reported	J5eO2h	0.0572	2	TRUE	6021	0.0238141	89.1639	1.33045e-09
rs150612106	A	G	A	G	-0.6947	0.3544	0.0261	0.024	FALSE	FALSE	FALSE	dcILJj	0.196	0.07058	outcome	TRUE	reported	textfile	22	40175781	3657	0.07833	1.132e-18	1717	TRUE	reported	J5eO2h	0.0261	2	TRUE	6021	0.0210558	78.6142	4.66224e-09
rs9611061	C	G	C	G	-0.4298	-0.1784	0.0655	0.0231	FALSE	TRUE	FALSE	dcILJj	0.2115	0.3989	outcome	TRUE	reported	textfile	22	39375623	3657	0.05206	2.095e-16	1717	TRUE	reported	J5eO2h	0.0655	2	TRUE	6021	0.018297	68.1219	2.33108e-09
rs76015644	G	A	G	A	-0.5436	0.0957	0.0194	0.0192	FALSE	FALSE	FALSE	dcILJj	0.1953	0.6243	outcome	TRUE	reported	textfile	22	44355693	3657	0.09062	2.183e-09	1717	TRUE	reported	J5eO2h	0.0194	2	TRUE	6021	0.00974391	35.9644	9.7687e-06
rs6000850	C	T	C	T	0.5376	0.2443	0.0194	0.9557	FALSE	FALSE	FALSE	dcILJj	0.1362	0.07299	outcome	TRUE	reported	textfile	22	38032090	3657	0.09181	5.191e-09	1717	TRUE	reported	J5eO2h	0.0194	2	TRUE	6021	0.00928882	34.269	0.000450186
rs73176684	C	T	C	T	0.2996	0.0658	0.0595	0.0494	FALSE	FALSE	FALSE	dcILJj	0.1185	0.5787	outcome	TRUE	reported	textfile	22	41778617	3657	0.05246	1.212e-08	1717	TRUE	reported	J5eO2h	0.0595	2	TRUE	6021	0.00883987	32.5979	3.23434e-05
rs4657041	C	T	C	T	-0.1313	-0.01	0.3344	0.5101	FALSE	FALSE	FALSE	dcILJj	0.0486	0.8373	outcome	TRUE	reported	textfile	1	161478859	3657	0.02699	1.183e-06	1717	TRUE	reported	J5eO2h	0.3344	2	TRUE	6021	0.0064298	23.653	0.000210374
rs1885397	C	A	C	A	-0.1529	0.052	0.1903	0.2449	FALSE	FALSE	FALSE	dcILJj	0.0595	0.3817	outcome	TRUE	reported	textfile	14	55233098	3657	0.03229	2.274e-06	1717	TRUE	reported	J5eO2h	0.1903	2	TRUE	6021	0.00609396	22.41	0.00140457
rs2925323	T	C	T	C	-0.1282	-0.1066	0.2923	0.3748	FALSE	FALSE	FALSE	dcILJj	0.0499	0.03272	outcome	TRUE	reported	textfile	3	101658926	3657	0.02808	5.148e-06	1717	TRUE	reported	J5eO2h	0.2923	2	TRUE	6021	0.00566746	20.8326	0.0223357
rs113510401	T	C	T	C	0.5059	-0.0046	0.0124	0.0279	FALSE	FALSE	FALSE	dcILJj	0.1555	0.9765	outcome	TRUE	reported	textfile	2	51662218	3657	0.1114	5.812e-06	1717	TRUE	reported	J5eO2h	0.0124	2	TRUE	6021	0.00560779	20.6121	0.000370644
rs56020760	T	C	T	C	-0.2371	0.1212	0.0607	0.0712	FALSE	FALSE	FALSE	dcILJj	0.0968	0.2108	outcome	TRUE	reported	textfile	10	72391681	3657	0.05243	6.293e-06	1717	TRUE	reported	J5eO2h	0.0607	2	TRUE	6021	0.00556105	20.4393	0.00520849
rs6680891	T	A	T	A	0.1361	-0.034	0.2122	0.3221	FALSE	TRUE	FALSE	dcILJj	0.0528	0.5194	outcome	TRUE	reported	textfile	1	164083691	3657	0.03048	8.199e-06	1717	TRUE	reported	J5eO2h	0.2122	2	TRUE	6021	0.00542251	19.9273	0.00179175
rs1436776	T	C	T	C	0.1135	-0.0547	0.3949	0.5219	FALSE	FALSE	FALSE	dcILJj	0.0489	0.2635	outcome	TRUE	reported	textfile	1	216235074	3657	0.02553	9.01e-06	1717	TRUE	reported	J5eO2h	0.3949	2	TRUE	6021	0.00537557	19.7539	0.00486689
rs74643433	T	C	T	C	-0.3816	-0.0201	0.0209	0.0215	FALSE	FALSE	FALSE	dcILJj	0.2074	0.9226	outcome	TRUE	reported	textfile	11	109385593	3657	0.08607	9.524e-06	1717	TRUE	reported	J5eO2h	0.0209	2	TRUE	6021	0.00534638	19.6461	0.000594603
rs1009544	C	G	C	G	-1.155	0.0377	0.1256	0.121	FALSE	TRUE	FALSE	PsiJH9	0.0775	0.6262	outcome	TRUE	reported	textfile	22	42239348	3657	0.03232	1e-200	1718	TRUE	reported	bUyLP6	0.1256	2	TRUE	6021	0.25883	1276.39	2.84987e-154
rs74481199	A	G	A	G	-0.5862	0.3711	0.0774	0.0273	FALSE	FALSE	FALSE	PsiJH9	0.1601	0.02044	outcome	TRUE	reported	textfile	22	43189335	3657	0.04718	9.52e-35	1718	TRUE	reported	bUyLP6	0.0774	2	TRUE	6021	0.0405036	154.29	9.7945e-17
rs148646251	G	A	G	A	-0.5412	-0.5678	0.0546	0.0255	FALSE	FALSE	FALSE	PsiJH9	0.1893	0.002701	outcome	TRUE	reported	textfile	22	40987104	3657	0.05641	1.504e-21	1718	TRUE	reported	bUyLP6	0.0546	2	TRUE	6021	0.0245518	91.9953	1.253e-08
rs5996172	A	T	A	T	-0.2388	-0.0771	0.3656	0.3193	FALSE	TRUE	FALSE	PsiJH9	0.065	0.2354	outcome	TRUE	reported	textfile	22	42872128	3657	0.02635	2.035e-19	1718	TRUE	reported	bUyLP6	0.3656	2	TRUE	6021	0.0219653	82.0861	1.63566e-10
rs76146864	T	C	T	C	-0.6909	0.2468	0.0264	0.0262	FALSE	FALSE	FALSE	PsiJH9	0.181	0.1727	outcome	TRUE	reported	textfile	22	40246055	3657	0.07791	1.152e-18	1718	TRUE	reported	bUyLP6	0.0264	2	TRUE	6021	0.0210513	78.5971	8.71875e-10
rs4657041	C	T	C	T	-0.1521	-0.01	0.3344	0.5101	FALSE	FALSE	FALSE	PsiJH9	0.0486	0.8373	outcome	TRUE	reported	textfile	1	161478859	3657	0.02702	1.932e-08	1718	TRUE	reported	bUyLP6	0.3344	2	TRUE	6021	0.00859045	31.6702	1.65605e-05
rs4823174	A	G	A	G	0.1438	-0.0244	0.4635	0.3937	FALSE	FALSE	FALSE	PsiJH9	0.0503	0.6273	outcome	TRUE	reported	textfile	22	44330274	3657	0.02569	2.329e-08	1718	TRUE	reported	bUyLP6	0.4635	2	TRUE	6021	0.00849492	31.315	3.95135e-05
rs9869373	T	C	T	C	-0.1306	-0.0962	0.2896	0.3772	FALSE	FALSE	FALSE	PsiJH9	0.0497	0.05288	outcome	TRUE	reported	textfile	3	101645001	3657	0.02837	4.307e-06	1718	TRUE	reported	bUyLP6	0.2896	2	TRUE	6021	0.00576147	21.1802	0.0147802
rs76400748	A	G	A	G	0.3817	-0.0553	0.0213	0.0462	FALSE	FALSE	FALSE	PsiJH9	0.1266	0.6622	outcome	TRUE	reported	textfile	11	131814009	3657	0.08512	7.539e-06	1718	TRUE	reported	bUyLP6	0.0213	2	TRUE	6021	0.00546858	20.0976	0.00109459
rs10243011	C	T	C	T	0.1683	0.1146	0.1272	0.1728	FALSE	FALSE	FALSE	PsiJH9	0.0658	0.08162	outcome	TRUE	reported	textfile	7	121282913	3657	0.03781	8.798e-06	1718	TRUE	reported	bUyLP6	0.1272	2	TRUE	6021	0.00538869	19.8024	0.0148033
rs1009544	C	G	C	G	-1.144	0.0377	0.1256	0.121	FALSE	TRUE	FALSE	F1LAZS	0.0775	0.6262	outcome	TRUE	reported	textfile	22	42239348	3658	0.03236	1e-200	1719	TRUE	reported	O2YSXC	0.1256	2	TRUE	6021	0.254653	1249.1	2.86603e-151
rs735537	G	A	G	A	0.2834	-0.0705	0.458	0.4353	FALSE	FALSE	FALSE	F1LAZS	0.0501	0.159	outcome	TRUE	reported	textfile	22	42812471	3658	0.02511	4.641e-29	1719	TRUE	reported	O2YSXC	0.458	2	TRUE	6021	0.0336509	127.312	1.40252e-15
rs148646251	G	A	G	A	-0.5509	-0.5678	0.0545	0.0255	FALSE	FALSE	FALSE	F1LAZS	0.1893	0.002701	outcome	TRUE	reported	textfile	22	40987104	3658	0.05624	2.189e-22	1719	TRUE	reported	O2YSXC	0.0545	2	TRUE	6021	0.0255603	95.8997	4.9541e-09
rs9611061	C	G	C	G	-0.4291	-0.1784	0.0655	0.0231	FALSE	TRUE	FALSE	F1LAZS	0.2115	0.3989	outcome	TRUE	reported	textfile	22	39375623	3658	0.05205	2.274e-16	1719	TRUE	reported	O2YSXC	0.0655	2	TRUE	6021	0.0182405	67.9263	2.47297e-09
rs13058590	T	C	T	C	-0.395	0.0849	0.0467	0.0241	FALSE	FALSE	FALSE	F1LAZS	0.187	0.6499	outcome	TRUE	reported	textfile	22	39641412	3658	0.05917	2.824e-11	1719	TRUE	reported	O2YSXC	0.0467	2	TRUE	6021	0.0120362	44.5403	6.52127e-07
rs12170003	T	C	T	C	-0.3219	-0.0422	0.0648	0.0337	FALSE	FALSE	FALSE	F1LAZS	0.1577	0.7888	outcome	TRUE	reported	textfile	22	37748690	3658	0.05084	2.725e-10	1719	TRUE	reported	O2YSXC	0.0648	2	TRUE	6021	0.0108406	40.0676	1.4363e-06
rs1801274	G	A	G	A	-0.1694	-0.0136	0.325	0.5096	FALSE	FALSE	FALSE	F1LAZS	0.0485	0.7784	outcome	TRUE	reported	textfile	1	161479745	3658	0.02694	3.642e-10	1719	TRUE	reported	O2YSXC	0.325	2	TRUE	6021	0.0106935	39.5179	1.77189e-06
rs76015644	G	A	G	A	-0.5011	0.0957	0.0194	0.0192	FALSE	FALSE	FALSE	F1LAZS	0.1953	0.6243	outcome	TRUE	reported	textfile	22	44355693	3658	0.09072	3.555e-08	1719	TRUE	reported	O2YSXC	0.0194	2	TRUE	6021	0.00827164	30.4934	5.14425e-05
rs1563991	T	G	T	G	0.149	-0.0662	0.1937	0.8164	FALSE	FALSE	FALSE	F1LAZS	0.0639	0.3005	outcome	TRUE	reported	textfile	11	37670518	3658	0.03176	2.818e-06	1719	TRUE	reported	O2YSXC	0.1937	2	TRUE	6021	0.00598085	21.9975	0.00221736
rs2925323	T	C	T	C	-0.1312	-0.1066	0.2922	0.3748	FALSE	FALSE	FALSE	F1LAZS	0.0499	0.03272	outcome	TRUE	reported	textfile	3	101658926	3658	0.02806	3.033e-06	1719	TRUE	reported	O2YSXC	0.2922	2	TRUE	6021	0.00594102	21.8502	0.0177427
rs6680891	T	A	T	A	0.1408	-0.034	0.2121	0.3221	FALSE	TRUE	FALSE	F1LAZS	0.0528	0.5194	outcome	TRUE	reported	textfile	1	164083691	3658	0.03048	3.949e-06	1719	TRUE	reported	O2YSXC	0.2121	2	TRUE	6021	0.0057997	21.3274	0.00117948
rs148563640	T	C	T	C	0.3914	-0.0929	0.0219	0.0216	FALSE	FALSE	FALSE	F1LAZS	0.2536	0.7142	outcome	TRUE	reported	textfile	17	48145906	3658	0.08568	5.069e-06	1719	TRUE	reported	O2YSXC	0.0219	2	TRUE	6021	0.00567242	20.8567	0.000740532
rs1609762	T	C	T	C	0.1138	0.0085	0.493	0.5105	FALSE	FALSE	FALSE	F1LAZS	0.0485	0.8602	outcome	TRUE	reported	textfile	14	33787438	3658	0.02492	5.125e-06	1719	TRUE	reported	O2YSXC	0.493	2	TRUE	6021	0.0056686	20.8426	0.000482411
rs149153670	C	T	C	T	-0.5443	0.0894	0.0118	0.0383	FALSE	FALSE	FALSE	F1LAZS	0.1469	0.5428	outcome	TRUE	reported	textfile	2	142280835	3658	0.12	5.899e-06	1719	TRUE	reported	O2YSXC	0.0118	2	TRUE	6021	0.00559287	20.5625	0.00137525
rs72658947	C	G	C	G	-0.4033	-0.3391	0.0187	0.031	FALSE	TRUE	FALSE	F1LAZS	0.1764	0.0546	outcome	TRUE	reported	textfile	1	30372026	3658	0.08976	7.256e-06	1719	TRUE	reported	O2YSXC	0.0187	2	TRUE	6021	0.00548854	20.1768	0.0183342
rs1885397	C	A	C	A	-0.1447	0.052	0.1903	0.2449	FALSE	FALSE	FALSE	F1LAZS	0.0595	0.3817	outcome	TRUE	reported	textfile	14	55233098	3658	0.0323	7.651e-06	1719	TRUE	reported	O2YSXC	0.1903	2	TRUE	6021	0.00545647	20.0583	0.00276536
rs114318843	C	T	C	T	-0.5034	-0.0691	0.0122	0.0315	FALSE	FALSE	FALSE	F1LAZS	0.1526	0.6506	outcome	TRUE	reported	textfile	2	164755835	3658	0.1124	7.683e-06	1719	TRUE	reported	O2YSXC	0.0122	2	TRUE	6021	0.0054535	20.0473	0.0011518
rs6666916	T	C	T	C	0.2918	0.1663	0.0387	0.0322	FALSE	FALSE	FALSE	F1LAZS	0.1519	0.2736	outcome	TRUE	reported	textfile	1	86007429	3658	0.06521	7.871e-06	1719	TRUE	reported	O2YSXC	0.0387	2	TRUE	6021	0.00544412	20.0127	0.00433172
rs35754161	T	G	T	G	-0.1127	-0.0547	0.4647	0.3544	FALSE	FALSE	FALSE	F1LAZS	0.0515	0.2887	outcome	TRUE	reported	textfile	15	51655048	3658	0.02548	9.912e-06	1719	TRUE	reported	O2YSXC	0.4647	2	TRUE	6021	0.00531972	19.5529	0.00462072
rs17002737	T	C	T	C	-1.327	0.012	0.0788	0.0866	FALSE	FALSE	FALSE	8YkUG0	0.0888	0.892	outcome	TRUE	reported	textfile	22	42282012	3655	0.04086	1e-200	1720	TRUE	reported	OnFc2U	0.0788	2	TRUE	6021	0.223949	1054.16	6.71847e-132
rs111993863	A	G	A	G	-0.847	0.2685	0.0364	0.016	FALSE	FALSE	FALSE	8YkUG0	0.2878	0.3509	outcome	TRUE	reported	textfile	22	42855698	3655	0.06674	3.736e-36	1720	TRUE	reported	OnFc2U	0.0364	2	TRUE	6021	0.0422065	160.974	7.60696e-21
rs5759079	A	G	A	G	-0.4046	0.1897	0.1406	0.0952	FALSE	FALSE	FALSE	8YkUG0	0.0855	0.02647	outcome	TRUE	reported	textfile	22	43393437	3655	0.03616	1.324e-28	1720	TRUE	reported	OnFc2U	0.1406	2	TRUE	6021	0.0331192	125.129	1.23578e-13
rs150612106	A	G	A	G	-0.6736	0.3544	0.0261	0.024	FALSE	FALSE	FALSE	8YkUG0	0.196	0.07058	outcome	TRUE	reported	textfile	22	40175781	3655	0.0786	1.507e-17	1720	TRUE	reported	OnFc2U	0.0261	2	TRUE	6021	0.0196984	73.4043	1.84077e-08
rs149806587	G	A	G	A	-0.4771	-0.5344	0.0525	0.0183	FALSE	FALSE	FALSE	8YkUG0	0.279	0.05545	outcome	TRUE	reported	textfile	22	40774205	3655	0.05763	1.726e-16	1720	TRUE	reported	OnFc2U	0.0525	2	TRUE	6021	0.0184063	68.4989	9.66665e-08
rs73176418	T	C	T	C	-0.354	0.1353	0.048	0.0251	FALSE	FALSE	FALSE	8YkUG0	0.1834	0.4608	outcome	TRUE	reported	textfile	22	44226266	3655	0.05831	1.395e-09	1720	TRUE	reported	OnFc2U	0.048	2	TRUE	6021	0.00998333	36.8369	1.50937e-05
rs141130967	G	T	G	T	-0.3436	0.3135	0.0417	0.0258	FALSE	FALSE	FALSE	8YkUG0	0.1916	0.1018	outcome	TRUE	reported	textfile	3	101706582	3655	0.06507	1.362e-07	1720	TRUE	reported	OnFc2U	0.0417	2	TRUE	6021	0.00757106	27.8681	0.001608
rs1801274	G	A	G	A	-0.1385	-0.0136	0.3246	0.5096	FALSE	FALSE	FALSE	8YkUG0	0.0485	0.7784	outcome	TRUE	reported	textfile	1	161479745	3655	0.02706	3.25e-07	1720	TRUE	reported	OnFc2U	0.3246	2	TRUE	6021	0.00711631	26.1822	0.000113371
rs1563991	T	G	T	G	0.1557	-0.0662	0.1938	0.8164	FALSE	FALSE	FALSE	8YkUG0	0.0639	0.3005	outcome	TRUE	reported	textfile	11	37670518	3655	0.03181	1.019e-06	1720	TRUE	reported	OnFc2U	0.1938	2	TRUE	6021	0.00651216	23.9449	0.00128186
rs117499379	C	T	C	T	0.2459	-0.0658	0.0683	0.0359	FALSE	FALSE	FALSE	8YkUG0	0.1866	0.7244	outcome	TRUE	reported	textfile	18	4343023	3655	0.05026	1.045e-06	1720	TRUE	reported	OnFc2U	0.0683	2	TRUE	6021	0.00650653	23.924	0.000274504
rs114318843	C	T	C	T	-0.5407	-0.0691	0.0122	0.0315	FALSE	FALSE	FALSE	8YkUG0	0.1526	0.6506	outcome	TRUE	reported	textfile	2	164755835	3655	0.1126	1.639e-06	1720	TRUE	reported	OnFc2U	0.0122	2	TRUE	6021	0.00626927	23.0461	0.000455856
rs148563640	T	C	T	C	0.4066	-0.0929	0.0219	0.0216	FALSE	FALSE	FALSE	8YkUG0	0.2536	0.7142	outcome	TRUE	reported	textfile	17	48145906	3655	0.08597	2.328e-06	1720	TRUE	reported	OnFc2U	0.0219	2	TRUE	6021	0.0060828	22.3565	0.000462371
rs6998646	G	T	G	T	0.1784	0.0082	0.1189	0.153	FALSE	FALSE	FALSE	8YkUG0	0.0688	0.9054	outcome	TRUE	reported	textfile	8	127759740	3655	0.03924	5.618e-06	1720	TRUE	reported	OnFc2U	0.1189	2	TRUE	6021	0.00562335	20.6583	0.000449014
rs56172578	A	G	A	G	0.1848	-0.0088	0.1096	0.0656	FALSE	FALSE	FALSE	8YkUG0	0.1042	0.9329	outcome	TRUE	reported	textfile	14	22597739	3655	0.04092	6.492e-06	1720	TRUE	reported	OnFc2U	0.1096	2	TRUE	6021	0.00554918	20.3843	0.000453173
rs57756059	G	A	G	A	0.1172	0.0539	0.3943	0.6166	FALSE	FALSE	FALSE	8YkUG0	0.0499	0.2801	outcome	TRUE	reported	textfile	4	77500796	3655	0.02602	6.884e-06	1720	TRUE	reported	OnFc2U	0.3943	2	TRUE	6021	0.00552013	20.277	0.00390401
rs11761810	A	C	A	C	0.1135	0.0191	0.4731	0.4158	FALSE	FALSE	FALSE	8YkUG0	0.0511	0.7083	outcome	TRUE	reported	textfile	7	152779596	3655	0.02532	7.593e-06	1720	TRUE	reported	OnFc2U	0.4731	2	TRUE	6021	0.00546759	20.0829	0.000957017
rs16957279	G	A	G	A	0.12	-0.0119	0.3224	0.3652	FALSE	FALSE	FALSE	8YkUG0	0.0509	0.8144	outcome	TRUE	reported	textfile	15	33954227	3655	0.02693	8.643e-06	1720	TRUE	reported	OnFc2U	0.3224	2	TRUE	6021	0.00540318	19.845	0.000757315
rs72901497	G	A	G	A	0.1646	0.0602	0.1727	0.1135	FALSE	FALSE	FALSE	3EjkeE	0.0784	0.4428	outcome	TRUE	reported	textfile	4	115677333	3656	0.03249	4.273e-07	1721	TRUE	reported	vSlt0x	0.1727	2	TRUE	6021	0.00697133	25.6521	0.000432638
rs13390788	G	A	G	A	0.13	0.0134	0.2607	0.1872	FALSE	FALSE	FALSE	3EjkeE	0.0648	0.8358	outcome	TRUE	reported	textfile	2	235624835	3656	0.02761	2.595e-06	1721	TRUE	reported	vSlt0x	0.2607	2	TRUE	6021	0.00602729	22.1573	0.000339823
rs1239945	A	G	A	G	0.1129	-0.0241	0.4659	0.5322	FALSE	FALSE	FALSE	3EjkeE	0.0491	0.6236	outcome	TRUE	reported	textfile	13	51107757	3656	0.02439	3.796e-06	1721	TRUE	reported	vSlt0x	0.4659	2	TRUE	6021	0.00582667	21.4154	0.000820414
rs7580866	C	T	C	T	0.113	0.0281	0.4716	0.5087	FALSE	FALSE	FALSE	3EjkeE	0.0491	0.5677	outcome	TRUE	reported	textfile	2	202479783	3656	0.02455	4.251e-06	1721	TRUE	reported	vSlt0x	0.4716	2	TRUE	6021	0.00576154	21.1747	0.00105577
rs997173	T	C	T	C	-0.1819	-0.1396	0.1083	0.0699	FALSE	FALSE	FALSE	3EjkeE	0.099	0.1585	outcome	TRUE	reported	textfile	12	55355033	3656	0.03977	4.942e-06	1721	TRUE	reported	vSlt0x	0.1083	2	TRUE	6021	0.00568945	20.9082	0.00618969
rs12318478	T	C	T	C	0.2726	0.0011	0.0442	0.0264	FALSE	FALSE	FALSE	3EjkeE	0.1766	0.9951	outcome	TRUE	reported	textfile	12	20830424	3656	0.05973	5.177e-06	1721	TRUE	reported	vSlt0x	0.0442	2	TRUE	6021	0.00566491	20.8175	0.000327591
rs13429	G	A	G	A	0.1093	0.0063	0.4747	0.4931	FALSE	FALSE	FALSE	3EjkeE	0.0485	0.8967	outcome	TRUE	reported	textfile	8	440424	3656	0.02414	6.102e-06	1721	TRUE	reported	vSlt0x	0.4747	2	TRUE	6021	0.00557611	20.4893	0.000486577
rs536003	A	G	A	G	0.1277	-0.0934	0.2444	0.2212	FALSE	FALSE	FALSE	3EjkeE	0.06	0.1198	outcome	TRUE	reported	textfile	1	40154898	3656	0.02826	6.385e-06	1721	TRUE	reported	vSlt0x	0.2444	2	TRUE	6021	0.00555408	20.408	0.0092086
rs6583759	C	A	C	A	-0.2738	0.0656	0.0427	0.0643	FALSE	FALSE	FALSE	3EjkeE	0.1047	0.5311	outcome	TRUE	reported	textfile	10	92976570	3656	0.06063	6.518e-06	1721	TRUE	reported	vSlt0x	0.0427	2	TRUE	6021	0.00554715	20.3823	0.00150605
rs1541174	C	G	C	G	-0.1509	-0.0101	0.1571	0.0901	FALSE	TRUE	FALSE	3EjkeE	0.0928	0.9129	outcome	TRUE	reported	textfile	10	130287175	3656	0.03343	6.556e-06	1721	TRUE	reported	vSlt0x	0.1571	2	TRUE	6021	0.00554225	20.3642	0.000482854
rs17248848	A	G	A	G	-0.2495	-0.1585	0.0507	0.026	FALSE	FALSE	FALSE	3EjkeE	0.1769	0.3702	outcome	TRUE	reported	textfile	8	107222079	3656	0.05558	7.392e-06	1721	TRUE	reported	vSlt0x	0.0507	2	TRUE	6021	0.00548164	20.1403	0.00281921
rs77441302	T	A	T	A	0.2084	0.0565	0.0741	0.0609	FALSE	TRUE	FALSE	3EjkeE	0.1065	0.5958	outcome	TRUE	reported	textfile	18	40519517	3656	0.04643	7.359e-06	1721	TRUE	reported	vSlt0x	0.0741	2	TRUE	6021	0.00548031	20.1354	0.00132297
rs111494817	C	T	C	T	-0.205	0.1042	0.0773	0.0915	FALSE	FALSE	FALSE	3EjkeE	0.0919	0.2569	outcome	TRUE	reported	textfile	3	49120006	3656	0.0457	7.471e-06	1721	TRUE	reported	vSlt0x	0.0773	2	TRUE	6021	0.00547376	20.1112	0.00453861
rs41324346	T	C	T	C	0.1112	-0.0264	0.4402	0.4999	FALSE	FALSE	FALSE	3EjkeE	0.0537	0.6226	outcome	TRUE	reported	textfile	10	89070745	3656	0.02499	8.844e-06	1721	TRUE	reported	vSlt0x	0.4402	2	TRUE	6021	0.00538673	19.7897	0.00135338
rs2098676	T	C	T	C	0.1153	-0.0955	0.3178	0.5788	FALSE	FALSE	FALSE	3EjkeE	0.0519	0.06568	outcome	TRUE	reported	textfile	5	172763674	3656	0.02593	9.052e-06	1721	TRUE	reported	vSlt0x	0.3178	2	TRUE	6021	0.00537904	19.7613	0.017629
rs664654	A	G	A	G	0.2609	-0.1722	0.0447	0.082	FALSE	FALSE	FALSE	3EjkeE	0.0961	0.07322	outcome	TRUE	reported	textfile	1	12185036	3656	0.05876	9.297e-06	1721	TRUE	reported	vSlt0x	0.0447	2	TRUE	6021	0.00536343	19.7037	0.0164929
rs16927639	T	C	T	C	0.1404	-0.0558	0.176	0.1033	FALSE	FALSE	FALSE	3EjkeE	0.0851	0.5123	outcome	TRUE	reported	textfile	8	62521732	3656	0.03164	9.378e-06	1721	TRUE	reported	vSlt0x	0.176	2	TRUE	6021	0.00535701	19.6799	0.0019757
rs55973216	T	C	T	C	-0.2299	0.2871	0.0579	0.0294	FALSE	FALSE	FALSE	3EjkeE	0.1645	0.08098	outcome	TRUE	reported	textfile	7	21380419	3656	0.05185	9.522e-06	1721	TRUE	reported	vSlt0x	0.0579	2	TRUE	6021	0.00534866	19.6491	0.0154519
rs10426452	A	G	A	G	-0.1391	0.0556	0.3815	0.2889	FALSE	FALSE	FALSE	6hiV9J	0.0546	0.3082	outcome	TRUE	reported	textfile	19	49907690	3595	0.02491	2.506e-08	1722	TRUE	reported	EK8P88	0.3815	2	TRUE	6021	0.00859918	31.1649	0.000150978
rs7280618	C	T	C	T	-0.3345	-0.377	0.0334	0.0153	FALSE	FALSE	FALSE	6hiV9J	0.2548	0.1389	outcome	TRUE	reported	textfile	21	41565479	3595	0.06882	1.216e-06	1722	TRUE	reported	EK8P88	0.0334	2	TRUE	6021	0.00652859	23.6114	0.00331261
rs1966917	A	G	A	G	-0.1981	0.1786	0.1021	0.0624	FALSE	FALSE	FALSE	6hiV9J	0.1031	0.08338	outcome	TRUE	reported	textfile	17	72108055	3595	0.0409	1.328e-06	1722	TRUE	reported	EK8P88	0.1021	2	TRUE	6021	0.00648334	23.4466	0.00561793
rs219712	T	C	T	C	-0.1463	0.0712	0.1974	0.1727	FALSE	FALSE	FALSE	6hiV9J	0.0648	0.2718	outcome	TRUE	reported	textfile	21	27751176	3595	0.0303	1.425e-06	1722	TRUE	reported	EK8P88	0.1974	2	TRUE	6021	0.00644313	23.3003	0.00166328
rs78401267	C	T	C	T	0.3318	-0.0316	0.0339	0.0674	FALSE	FALSE	FALSE	6hiV9J	0.1041	0.7617	outcome	TRUE	reported	textfile	3	189064197	3595	0.0688	1.477e-06	1722	TRUE	reported	EK8P88	0.0339	2	TRUE	6021	0.00642801	23.2452	0.000287643
rs67130681	G	A	G	A	0.1354	-0.1051	0.2465	0.1952	FALSE	FALSE	FALSE	6hiV9J	0.0627	0.0936	outcome	TRUE	reported	textfile	18	71598971	3595	0.02816	1.585e-06	1722	TRUE	reported	EK8P88	0.2465	2	TRUE	6021	0.00638983	23.1063	0.0055079
rs13391592	A	C	A	C	0.2246	0.089	0.0708	0.0507	FALSE	FALSE	FALSE	6hiV9J	0.1201	0.4586	outcome	TRUE	reported	textfile	2	180409011	3595	0.04714	1.96e-06	1722	TRUE	reported	EK8P88	0.0708	2	TRUE	6021	0.00627491	22.6881	0.000923409
rs12438058	C	T	C	T	0.1624	0.0726	0.1439	0.1823	FALSE	FALSE	FALSE	6hiV9J	0.065	0.2641	outcome	TRUE	reported	textfile	15	39819219	3595	0.03416	2.058e-06	1722	TRUE	reported	EK8P88	0.1439	2	TRUE	6021	0.00624763	22.5889	0.00210583
rs113004536	A	G	A	G	-0.2154	0.0694	0.072	0.03	FALSE	FALSE	FALSE	6hiV9J	0.1625	0.6694	outcome	TRUE	reported	textfile	22	18923443	3595	0.04611	3.1e-06	1722	TRUE	reported	EK8P88	0.072	2	TRUE	6021	0.00603356	21.8102	0.000600518
rs11161637	G	A	G	A	-0.1116	0.0666	0.4306	0.435	FALSE	FALSE	FALSE	6hiV9J	0.0492	0.176	outcome	TRUE	reported	textfile	1	86021169	3595	0.02439	4.957e-06	1722	TRUE	reported	EK8P88	0.4306	2	TRUE	6021	0.00579007	20.9249	0.00528039
rs116862171	G	A	G	A	-0.3796	0.0537	0.0218	0.0182	FALSE	FALSE	FALSE	6hiV9J	0.1984	0.7866	outcome	TRUE	reported	textfile	6	112145789	3595	0.08302	4.972e-06	1722	TRUE	reported	EK8P88	0.0218	2	TRUE	6021	0.00578189	20.8951	0.000562956
rs75455523	T	C	T	C	-0.4114	0.0052	0.0197	0.0321	FALSE	FALSE	FALSE	6hiV9J	0.1651	0.9751	outcome	TRUE	reported	textfile	15	96941966	3595	0.09002	5.038e-06	1722	TRUE	reported	EK8P88	0.0197	2	TRUE	6021	0.00577612	20.8742	0.000326568
rs41267263	G	T	G	T	0.4339	-0.2391	0.0171	0.0187	FALSE	FALSE	FALSE	6hiV9J	0.2293	0.2971	outcome	TRUE	reported	textfile	1	36335349	3595	0.09531	5.482e-06	1722	TRUE	reported	EK8P88	0.0171	2	TRUE	6021	0.00573201	20.7138	0.00306433
rs72664677	T	C	T	C	-0.1263	0.137	0.2576	0.168	FALSE	FALSE	FALSE	6hiV9J	0.067	0.04095	outcome	TRUE	reported	textfile	14	32638300	3595	0.02777	5.649e-06	1722	TRUE	reported	EK8P88	0.2576	2	TRUE	6021	0.0057209	20.6735	0.0190135
rs62290470	C	G	C	G	-0.2329	-0.075	0.0583	0.1102	FALSE	TRUE	FALSE	6hiV9J	0.0825	0.3637	outcome	TRUE	reported	textfile	4	5132403	3595	0.05179	7.096e-06	1722	TRUE	reported	EK8P88	0.0583	2	TRUE	6021	0.00559387	20.2118	0.00270767
rs113045391	T	C	T	C	0.1598	0.0703	0.1346	0.1551	FALSE	FALSE	FALSE	6hiV9J	0.0703	0.3172	outcome	TRUE	reported	textfile	2	201721041	3595	0.03586	8.591e-06	1722	TRUE	reported	EK8P88	0.1346	2	TRUE	6021	0.00549341	19.8468	0.00359861
rs9402148	T	C	T	C	-0.27	-0.0634	0.0419	0.0564	FALSE	FALSE	FALSE	6hiV9J	0.1153	0.5824	outcome	TRUE	reported	textfile	6	129929521	3595	0.06072	8.997e-06	1722	TRUE	reported	EK8P88	0.0419	2	TRUE	6021	0.00546995	19.7616	0.00147804
rs7189927	C	T	C	T	0.1583	-0.0357	0.4019	0.654	FALSE	FALSE	FALSE	rGX6nv	0.0515	0.4883	outcome	TRUE	reported	textfile	16	28913787	3656	0.025	2.701e-10	1723	TRUE	reported	yv9zXM	0.4019	2	TRUE	6021	0.0108477	40.0723	5.13535e-06
rs113812519	G	A	G	A	0.4979	0.2238	0.0185	0.0185	FALSE	FALSE	FALSE	rGX6nv	0.2056	0.2764	outcome	TRUE	reported	textfile	1	207276336	3656	0.09189	6.383e-08	1723	TRUE	reported	yv9zXM	0.0185	2	TRUE	6021	0.00796651	29.3434	0.000319341
rs764603	C	A	C	A	0.5734	0.0315	0.0131	0.0166	FALSE	FALSE	FALSE	rGX6nv	0.2224	0.8875	outcome	TRUE	reported	textfile	6	36793516	3656	0.1073	9.644e-08	1723	TRUE	reported	yv9zXM	0.0131	2	TRUE	6021	0.00775052	28.5416	3.7494e-05
rs80268044	A	G	A	G	0.1776	0.0245	0.1766	0.0954	FALSE	FALSE	FALSE	rGX6nv	0.0851	0.7736	outcome	TRUE	reported	textfile	2	43810948	3656	0.03331	1.027e-07	1723	TRUE	reported	yv9zXM	0.1766	2	TRUE	6021	0.00771555	28.4118	5.74703e-05
rs9350187	T	C	T	C	-0.2608	0.0132	0.0607	0.0763	FALSE	FALSE	FALSE	rGX6nv	0.0934	0.8879	outcome	TRUE	reported	textfile	6	19794487	3656	0.05115	3.591e-07	1723	TRUE	reported	yv9zXM	0.0607	2	TRUE	6021	0.00706058	25.9828	8.49673e-05
rs4649079	T	C	T	C	0.2157	-0.0746	0.0961	0.062	FALSE	FALSE	FALSE	rGX6nv	0.1249	0.5502	outcome	TRUE	reported	textfile	1	25535823	3656	0.04246	3.969e-07	1723	TRUE	reported	yv9zXM	0.0961	2	TRUE	6021	0.00700937	25.793	0.000277894
rs7718237	A	G	A	G	0.1236	0.0521	0.4837	0.4003	FALSE	FALSE	FALSE	rGX6nv	0.0501	0.2991	outcome	TRUE	reported	textfile	5	173972852	3656	0.02478	6.384e-07	1723	TRUE	reported	yv9zXM	0.4837	2	TRUE	6021	0.00675901	24.8655	0.000999681
rs144743804	A	G	A	G	0.4457	0.5584	0.0197	0.0181	FALSE	FALSE	FALSE	rGX6nv	0.2625	0.03343	outcome	TRUE	reported	textfile	1	207018206	3656	0.08939	6.458e-07	1723	TRUE	reported	yv9zXM	0.0197	2	TRUE	6021	0.00675395	24.8468	0.00876515
rs5762000	T	C	T	C	0.1546	-0.0644	0.1854	0.2198	FALSE	FALSE	FALSE	rGX6nv	0.0645	0.3182	outcome	TRUE	reported	textfile	22	27530934	3656	0.0313	8.147e-07	1723	TRUE	reported	yv9zXM	0.1854	2	TRUE	6021	0.00662881	24.3833	0.00104583
rs72988602	G	A	G	A	0.1815	0.0448	0.1347	0.0728	FALSE	FALSE	FALSE	rGX6nv	0.0982	0.6481	outcome	TRUE	reported	textfile	19	7114038	3656	0.03684	8.735e-07	1723	TRUE	reported	yv9zXM	0.1347	2	TRUE	6021	0.00659529	24.2592	0.000316731
rs113612962	C	G	C	G	-0.3031	0.0368	0.0402	0.0526	FALSE	TRUE	FALSE	rGX6nv	0.1209	0.7609	outcome	TRUE	reported	textfile	22	43167446	3656	0.06273	1.409e-06	1723	TRUE	reported	yv9zXM	0.0402	2	TRUE	6021	0.00634528	23.3337	0.000294694
rs6575228	A	G	A	G	-0.1199	-0.0213	0.4126	0.4462	FALSE	FALSE	FALSE	rGX6nv	0.0486	0.6621	outcome	TRUE	reported	textfile	14	92561395	3656	0.02485	1.467e-06	1723	TRUE	reported	yv9zXM	0.4126	2	TRUE	6021	0.00632736	23.2674	0.000412055
rs78007482	A	T	A	T	-0.2189	0.144	0.0819	0.0727	FALSE	TRUE	FALSE	rGX6nv	0.0961	0.1339	outcome	TRUE	reported	textfile	8	133189482	3656	0.04544	1.52e-06	1723	TRUE	reported	yv9zXM	0.0819	2	TRUE	6021	0.00630755	23.1941	0.00404291
rs2903728	C	T	C	T	-0.1849	0.07	0.1146	0.2171	FALSE	FALSE	FALSE	rGX6nv	0.0598	0.2417	outcome	TRUE	reported	textfile	19	56408295	3656	0.03879	1.94e-06	1723	TRUE	reported	yv9zXM	0.1146	2	TRUE	6021	0.00617643	22.7089	0.00239396
rs149168550	G	C	G	C	0.234	0.034	0.0673	0.0223	FALSE	TRUE	FALSE	rGX6nv	0.2339	0.8846	outcome	TRUE	reported	textfile	12	111354000	3656	0.04939	2.252e-06	1723	TRUE	reported	yv9zXM	0.0673	2	TRUE	6021	0.00610224	22.4345	0.000268724
rs112846834	A	C	A	C	0.249	0.2522	0.0563	0.0975	FALSE	FALSE	FALSE	rGX6nv	0.094	0.007302	outcome	TRUE	reported	textfile	17	7725660	3656	0.05331	3.103e-06	1723	TRUE	reported	yv9zXM	0.0563	2	TRUE	6021	0.00593187	21.8044	0.0421657
rs17706571	T	C	T	C	0.4536	0.2019	0.0164	0.0163	FALSE	FALSE	FALSE	rGX6nv	0.2071	0.3294	outcome	TRUE	reported	textfile	12	29271392	3656	0.09841	4.186e-06	1723	TRUE	reported	yv9zXM	0.0164	2	TRUE	6021	0.00577757	21.2339	0.00242221
rs35553650	A	G	A	G	-0.3694	-0.08	0.0245	0.0307	FALSE	FALSE	FALSE	rGX6nv	0.1507	0.5954	outcome	TRUE	reported	textfile	6	37456130	3656	0.08052	4.625e-06	1723	TRUE	reported	yv9zXM	0.0245	2	TRUE	6021	0.00572383	21.0353	0.00100628
rs281142	A	G	A	G	0.237	0.0687	0.0598	0.1472	FALSE	FALSE	FALSE	rGX6nv	0.0747	0.3574	outcome	TRUE	reported	textfile	5	70969845	3656	0.05178	4.879e-06	1723	TRUE	reported	yv9zXM	0.0598	2	TRUE	6021	0.00569751	20.938	0.00235424
rs12554596	G	A	G	A	-0.1166	0.0314	0.3892	0.2119	FALSE	FALSE	FALSE	rGX6nv	0.0632	0.6186	outcome	TRUE	reported	textfile	9	37002142	3656	0.02549	4.961e-06	1723	TRUE	reported	yv9zXM	0.3892	2	TRUE	6021	0.00569079	20.9132	0.000969666
rs10917581	G	A	G	A	0.1298	-0.062	0.2533	0.2433	FALSE	FALSE	FALSE	rGX6nv	0.058	0.2849	outcome	TRUE	reported	textfile	1	162624504	3656	0.0285	5.392e-06	1723	TRUE	reported	yv9zXM	0.2533	2	TRUE	6021	0.00564152	20.7311	0.00336888
rs1424083	G	A	G	A	-0.1153	0.0508	0.3463	0.708	FALSE	FALSE	FALSE	rGX6nv	0.0545	0.3515	outcome	TRUE	reported	textfile	16	74304865	3656	0.02568	7.282e-06	1723	TRUE	reported	yv9zXM	0.3463	2	TRUE	6021	0.00548371	20.148	0.00302424
rs589151	T	C	T	C	-0.1107	0.0441	0.4599	0.5157	FALSE	FALSE	FALSE	rGX6nv	0.0485	0.363	outcome	TRUE	reported	textfile	1	10567711	3656	0.02478	8.163e-06	1723	TRUE	reported	yv9zXM	0.4599	2	TRUE	6021	0.00542903	19.946	0.00306099
rs6678796	T	C	T	C	0.2198	-0.1072	0.0632	0.8298	FALSE	FALSE	FALSE	rGX6nv	0.0659	0.104	outcome	TRUE	reported	textfile	1	247157835	3656	0.04953	9.366e-06	1723	TRUE	reported	yv9zXM	0.0632	2	TRUE	6021	0.00535771	19.6825	0.0125096
rs113812519	G	A	G	A	0.5546	0.2238	0.0185	0.0185	FALSE	FALSE	FALSE	unZP8p	0.2056	0.2764	outcome	TRUE	reported	textfile	1	207276336	3656	0.09212	1.915e-09	1724	TRUE	reported	LkaVWh	0.0185	2	TRUE	6021	0.00981661	36.2255	4.66578e-05
rs11643297	G	A	G	A	0.148	-0.0352	0.3891	0.6984	FALSE	FALSE	FALSE	unZP8p	0.0533	0.5093	outcome	TRUE	reported	textfile	16	28973268	3656	0.02557	7.819e-09	1724	TRUE	reported	LkaVWh	0.3891	2	TRUE	6021	0.00908018	33.483	3.28967e-05
rs144743804	A	G	A	G	0.4882	0.5584	0.0197	0.0181	FALSE	FALSE	FALSE	unZP8p	0.2625	0.03343	outcome	TRUE	reported	textfile	1	207018206	3656	0.08965	5.502e-08	1724	TRUE	reported	LkaVWh	0.0197	2	TRUE	6021	0.00804601	29.6386	0.00286143
rs80268044	A	G	A	G	0.169	0.0245	0.1766	0.0954	FALSE	FALSE	FALSE	unZP8p	0.0851	0.7736	outcome	TRUE	reported	textfile	2	43810948	3656	0.03343	4.546e-07	1724	TRUE	reported	LkaVWh	0.1766	2	TRUE	6021	0.00694175	25.5425	0.000141367
rs764603	C	A	C	A	0.5431	0.0315	0.0131	0.0166	FALSE	FALSE	FALSE	unZP8p	0.2224	0.8875	outcome	TRUE	reported	textfile	6	36793516	3656	0.1078	4.877e-07	1724	TRUE	reported	LkaVWh	0.0131	2	TRUE	6021	0.00689463	25.3679	0.000103582
rs72988602	G	A	G	A	0.1848	0.0448	0.1347	0.0728	FALSE	FALSE	FALSE	unZP8p	0.0982	0.6481	outcome	TRUE	reported	textfile	19	7114038	3656	0.03697	6.037e-07	1724	TRUE	reported	LkaVWh	0.1347	2	TRUE	6021	0.00678798	24.9728	0.000254422
rs6575228	A	G	A	G	-0.1231	-0.0213	0.4126	0.4462	FALSE	FALSE	FALSE	unZP8p	0.0486	0.6621	outcome	TRUE	reported	textfile	14	92561395	3656	0.02494	8.373e-07	1724	TRUE	reported	LkaVWh	0.4126	2	TRUE	6021	0.00661961	24.3492	0.000295259
rs4942349	G	A	G	A	-0.1282	0.0906	0.3333	0.3198	FALSE	FALSE	FALSE	unZP8p	0.0579	0.1178	outcome	TRUE	reported	textfile	13	31564105	3656	0.02644	1.294e-06	1724	TRUE	reported	LkaVWh	0.3333	2	TRUE	6021	0.00638945	23.4972	0.00425372
rs148381451	T	C	T	C	-0.27	-0.0573	0.0496	0.0313	FALSE	FALSE	FALSE	unZP8p	0.1684	0.7337	outcome	TRUE	reported	textfile	17	63085557	3656	0.0563	1.68e-06	1724	TRUE	reported	LkaVWh	0.0496	2	TRUE	6021	0.00625145	22.9865	0.00035766
rs113612962	C	G	C	G	-0.2991	0.0368	0.0402	0.0526	FALSE	TRUE	FALSE	unZP8p	0.1209	0.7609	outcome	TRUE	reported	textfile	22	43167446	3656	0.06296	2.108e-06	1724	TRUE	reported	LkaVWh	0.0402	2	TRUE	6021	0.00613514	22.5562	0.000376418
rs7955052	G	T	G	T	0.1176	0.0019	0.4716	0.4467	FALSE	FALSE	FALSE	unZP8p	0.0488	0.9686	outcome	TRUE	reported	textfile	12	116058771	3656	0.02511	2.931e-06	1724	TRUE	reported	LkaVWh	0.4716	2	TRUE	6021	0.00596372	21.9222	0.000246045
rs4887740	T	C	T	C	-0.1386	0.0217	0.2804	0.6758	FALSE	FALSE	FALSE	unZP8p	0.0575	0.7055	outcome	TRUE	reported	textfile	16	33928022	3656	0.02963	3.012e-06	1724	TRUE	reported	LkaVWh	0.2804	2	TRUE	6021	0.0059493	21.8688	0.000552618
rs7718237	A	G	A	G	0.1163	0.0521	0.4837	0.4003	FALSE	FALSE	FALSE	unZP8p	0.0501	0.2991	outcome	TRUE	reported	textfile	5	173972852	3656	0.02488	3.032e-06	1724	TRUE	reported	LkaVWh	0.4837	2	TRUE	6021	0.00594107	21.8384	0.00233324
rs28560225	G	A	G	A	0.1234	0.0176	0.3079	0.7075	FALSE	FALSE	FALSE	unZP8p	0.0567	0.7562	outcome	TRUE	reported	textfile	10	125700760	3656	0.02669	3.888e-06	1724	TRUE	reported	LkaVWh	0.3079	2	TRUE	6021	0.00581293	21.3646	0.000555674
rs77697711	A	C	A	C	0.2112	-0.0227	0.081	0.0855	FALSE	FALSE	FALSE	unZP8p	0.0968	0.8146	outcome	TRUE	reported	textfile	22	45116977	3656	0.04573	4.003e-06	1724	TRUE	reported	LkaVWh	0.081	2	TRUE	6021	0.00580033	21.3181	0.000473965
rs4649080	T	C	T	C	0.1981	-0.1158	0.0937	0.0585	FALSE	FALSE	FALSE	unZP8p	0.1252	0.355	outcome	TRUE	reported	textfile	1	25737116	3656	0.04302	4.257e-06	1724	TRUE	reported	LkaVWh	0.0937	2	TRUE	6021	0.00576647	21.1929	0.00221264
rs5762000	T	C	T	C	0.1441	-0.0644	0.1854	0.2198	FALSE	FALSE	FALSE	unZP8p	0.0645	0.3182	outcome	TRUE	reported	textfile	22	27530934	3656	0.03143	4.678e-06	1724	TRUE	reported	LkaVWh	0.1854	2	TRUE	6021	0.00571667	21.0088	0.00270732
rs1595602	G	T	G	T	0.1664	0.1045	0.1365	0.1341	FALSE	FALSE	FALSE	unZP8p	0.0693	0.1315	outcome	TRUE	reported	textfile	3	61090473	3656	0.0364	5.017e-06	1724	TRUE	reported	LkaVWh	0.1365	2	TRUE	6021	0.00568358	20.8865	0.00745998
rs77175237	T	A	T	A	0.2578	-0.0363	0.0483	0.0289	FALSE	TRUE	FALSE	unZP8p	0.1743	0.8352	outcome	TRUE	reported	textfile	5	72039498	3656	0.0566	5.406e-06	1724	TRUE	reported	LkaVWh	0.0483	2	TRUE	6021	0.00564247	20.7346	0.000537915
rs78007482	A	T	A	T	-0.2074	0.144	0.0819	0.0727	FALSE	TRUE	FALSE	unZP8p	0.0961	0.1339	outcome	TRUE	reported	textfile	8	133189482	3656	0.04563	5.677e-06	1724	TRUE	reported	LkaVWh	0.0819	2	TRUE	6021	0.00561905	20.648	0.0077948
rs9892181	C	G	C	G	-0.3924	0.5132	0.0208	0.0171	FALSE	TRUE	FALSE	unZP8p	0.2328	0.02751	outcome	TRUE	reported	textfile	17	76534817	3656	0.08722	7.056e-06	1724	TRUE	reported	LkaVWh	0.0208	2	TRUE	6021	0.00550582	20.2296	0.0284761
rs10999014	T	C	T	C	-0.1593	-0.0437	0.1413	0.1541	FALSE	FALSE	FALSE	unZP8p	0.07	0.5318	outcome	TRUE	reported	textfile	10	71648522	3656	0.03545	7.227e-06	1724	TRUE	reported	LkaVWh	0.1413	2	TRUE	6021	0.00549289	20.1819	0.00159185
rs73393708	G	T	G	T	0.157	0.0454	0.1513	0.1664	FALSE	FALSE	FALSE	unZP8p	0.0662	0.4929	outcome	TRUE	reported	textfile	7	90292336	3656	0.03499	7.507e-06	1724	TRUE	reported	LkaVWh	0.1513	2	TRUE	6021	0.00547672	20.1221	0.00184345
rs6678796	T	C	T	C	0.222	-0.1072	0.0632	0.8298	FALSE	FALSE	FALSE	unZP8p	0.0659	0.104	outcome	TRUE	reported	textfile	1	247157835	3656	0.04971	8.226e-06	1724	TRUE	reported	LkaVWh	0.0632	2	TRUE	6021	0.00542562	19.9334	0.0117486
rs12554596	G	A	G	A	-0.1142	0.0314	0.3892	0.2119	FALSE	FALSE	FALSE	unZP8p	0.0632	0.6186	outcome	TRUE	reported	textfile	9	37002142	3656	0.02558	8.193e-06	1724	TRUE	reported	LkaVWh	0.3892	2	TRUE	6021	0.00542205	19.9202	0.0013148
rs6602758	T	C	T	C	-0.2961	-0.0424	0.0342	0.0976	FALSE	FALSE	FALSE	unZP8p	0.0846	0.6161	outcome	TRUE	reported	textfile	10	14778920	3656	0.06641	8.493e-06	1724	TRUE	reported	LkaVWh	0.0342	2	TRUE	6021	0.00540815	19.8688	0.00134815
rs9814135	C	T	C	T	-0.1722	-0.0707	0.1161	0.7885	FALSE	FALSE	FALSE	unZP8p	0.0698	0.3109	outcome	TRUE	reported	textfile	3	194094110	3656	0.03865	8.614e-06	1724	TRUE	reported	LkaVWh	0.1161	2	TRUE	6021	0.0054002	19.8395	0.00387109
rs7766104	G	A	G	A	-0.1365	0.0741	0.1979	0.1083	FALSE	FALSE	FALSE	unZP8p	0.0812	0.3614	outcome	TRUE	reported	textfile	6	105665214	3656	0.03071	9.148e-06	1724	TRUE	reported	LkaVWh	0.1979	2	TRUE	6021	0.00537476	19.7455	0.00326284
rs113812519	G	A	G	A	0.5314	0.2238	0.0185	0.0185	FALSE	FALSE	FALSE	ywp9nA	0.2056	0.2764	outcome	TRUE	reported	textfile	1	207276336	3656	0.09132	6.419e-09	1725	TRUE	reported	uZAVGw	0.0185	2	TRUE	6021	0.00917701	33.8434	9.08766e-05
rs754067	C	T	C	T	-0.1986	0.0594	0.1142	0.2004	FALSE	FALSE	FALSE	ywp9nA	0.0638	0.3519	outcome	TRUE	reported	textfile	16	17323672	3656	0.03867	2.962e-07	1725	TRUE	reported	uZAVGw	0.1142	2	TRUE	6021	0.00716279	26.3616	0.000513239
rs67316035	A	T	A	T	-0.1993	-0.0774	0.1037	0.2117	FALSE	TRUE	FALSE	ywp9nA	0.0603	0.199	outcome	TRUE	reported	textfile	11	132221605	3656	0.04029	7.895e-07	1725	TRUE	reported	uZAVGw	0.1037	2	TRUE	6021	0.0066484	24.4558	0.00188064
rs12216684	A	G	A	G	0.2641	-0.1754	0.0543	0.0717	FALSE	FALSE	FALSE	ywp9nA	0.0986	0.07542	outcome	TRUE	reported	textfile	7	56291533	3656	0.05347	8.154e-07	1725	TRUE	reported	uZAVGw	0.0543	2	TRUE	6021	0.0066286	24.3825	0.00513737
rs1290397	A	G	A	G	0.1188	-0.0223	0.49	0.5181	FALSE	FALSE	FALSE	ywp9nA	0.0509	0.6611	outcome	TRUE	reported	textfile	17	77948063	3656	0.0244	1.16e-06	1725	TRUE	reported	uZAVGw	0.49	2	TRUE	6021	0.00644229	23.6928	0.000361293
rs8109226	G	T	G	T	0.1199	0.0838	0.437	0.3386	FALSE	FALSE	FALSE	ywp9nA	0.0572	0.1425	outcome	TRUE	reported	textfile	19	710050	3656	0.02475	1.321e-06	1725	TRUE	reported	uZAVGw	0.437	2	TRUE	6021	0.00637827	23.4558	0.00353837
rs148381451	T	C	T	C	-0.2703	-0.0573	0.0496	0.0313	FALSE	FALSE	FALSE	ywp9nA	0.1684	0.7337	outcome	TRUE	reported	textfile	17	63085557	3656	0.05589	1.379e-06	1725	TRUE	reported	uZAVGw	0.0496	2	TRUE	6021	0.00635694	23.3769	0.000316528
rs2903728	C	T	C	T	-0.1842	0.07	0.1147	0.2171	FALSE	FALSE	FALSE	ywp9nA	0.0598	0.2417	outcome	TRUE	reported	textfile	19	56408295	3656	0.03863	1.916e-06	1725	TRUE	reported	uZAVGw	0.1147	2	TRUE	6021	0.00618061	22.7244	0.00238385
rs1449311	A	G	A	G	0.1265	0.0672	0.3074	0.2889	FALSE	FALSE	FALSE	ywp9nA	0.055	0.2222	outcome	TRUE	reported	textfile	3	100703124	3656	0.02699	2.904e-06	1725	TRUE	reported	uZAVGw	0.3074	2	TRUE	6021	0.00597265	21.9552	0.00325875
rs1345010	G	T	G	T	0.192	0.0868	0.0946	0.0821	FALSE	FALSE	FALSE	ywp9nA	0.0897	0.3332	outcome	TRUE	reported	textfile	2	174113733	3656	0.04147	3.789e-06	1725	TRUE	reported	uZAVGw	0.0946	2	TRUE	6021	0.00582894	21.4238	0.00226185
rs145392098	A	G	A	G	0.3549	0.1782	0.0272	0.0199	FALSE	FALSE	FALSE	ywp9nA	0.2444	0.466	outcome	TRUE	reported	textfile	2	95682916	3656	0.07695	4.107e-06	1725	TRUE	reported	uZAVGw	0.0272	2	TRUE	6021	0.00578454	21.2597	0.00144198
rs764603	C	A	C	A	0.4921	0.0315	0.0131	0.0166	FALSE	FALSE	FALSE	ywp9nA	0.2224	0.8875	outcome	TRUE	reported	textfile	6	36793516	3656	0.107	4.431e-06	1725	TRUE	reported	uZAVGw	0.0131	2	TRUE	6021	0.00575212	21.1398	0.000404837
rs78895027	C	T	C	T	0.174	0.1588	0.1162	0.0764	FALSE	FALSE	FALSE	ywp9nA	0.1016	0.1179	outcome	TRUE	reported	textfile	6	112306917	3656	0.03801	4.87e-06	1725	TRUE	reported	uZAVGw	0.1162	2	TRUE	6021	0.00569921	20.9443	0.00812767
rs2904880	G	C	G	C	0.1142	0.0135	0.403	0.3159	FALSE	TRUE	FALSE	ywp9nA	0.053	0.7987	outcome	TRUE	reported	textfile	16	28944396	3656	0.02503	5.179e-06	1725	TRUE	reported	uZAVGw	0.403	2	TRUE	6021	0.00566159	20.8052	0.000584559
rs17493333	C	T	C	T	-0.3491	0.0615	0.0246	0.0487	FALSE	FALSE	FALSE	ywp9nA	0.118	0.6022	outcome	TRUE	reported	textfile	12	19098939	3656	0.07741	6.67e-06	1725	TRUE	reported	uZAVGw	0.0246	2	TRUE	6021	0.0055321	20.3267	0.00122318
rs9639817	T	C	T	C	-0.1116	-0.0499	0.3861	0.355	FALSE	FALSE	FALSE	ywp9nA	0.0516	0.334	outcome	TRUE	reported	textfile	7	40085765	3656	0.02477	6.838e-06	1725	TRUE	reported	uZAVGw	0.3861	2	TRUE	6021	0.00552161	20.288	0.00311616
rs11120838	G	C	G	C	-0.2755	0.0641	0.0434	0.0527	FALSE	TRUE	FALSE	ywp9nA	0.1112	0.5642	outcome	TRUE	reported	textfile	1	7149639	3656	0.06139	7.405e-06	1725	TRUE	reported	uZAVGw	0.0434	2	TRUE	6021	0.00547843	20.1284	0.00146202
rs1986507	A	G	A	G	0.1399	-0.0242	0.1859	0.2673	FALSE	FALSE	FALSE	ywp9nA	0.0557	0.6635	outcome	TRUE	reported	textfile	17	10082301	3656	0.03126	7.921e-06	1725	TRUE	reported	uZAVGw	0.1859	2	TRUE	6021	0.00544852	20.018	0.00111545
rs80273434	C	G	C	G	-0.24	-0.1263	0.0535	0.0679	FALSE	TRUE	FALSE	ywp9nA	0.1051	0.2297	outcome	TRUE	reported	textfile	8	141772905	3656	0.05365	7.902e-06	1725	TRUE	reported	uZAVGw	0.0535	2	TRUE	6021	0.00544385	20.0007	0.0053253
rs34798965	A	C	A	C	-0.2	-0.0639	0.0788	0.1076	FALSE	FALSE	FALSE	ywp9nA	0.081	0.4299	outcome	TRUE	reported	textfile	10	71647692	3656	0.04481	8.338e-06	1725	TRUE	reported	uZAVGw	0.0788	2	TRUE	6021	0.00541931	19.9101	0.00242648
rs12554596	G	A	G	A	-0.1325	0.0314	0.3892	0.2119	FALSE	FALSE	FALSE	G3mlEt	0.0632	0.6186	outcome	TRUE	reported	textfile	9	37002142	3645	0.02534	1.822e-07	1726	TRUE	reported	i50eTp	0.3892	2	TRUE	6021	0.00744519	27.3263	0.000135431
rs2356414	T	C	T	C	0.1555	0.0294	0.1894	0.6957	FALSE	FALSE	FALSE	G3mlEt	0.0537	0.5841	outcome	TRUE	reported	textfile	16	71378301	3645	0.03203	1.265e-06	1726	TRUE	reported	i50eTp	0.1894	2	TRUE	6021	0.00642466	23.5564	0.000481053
rs112802874	G	T	G	T	0.429	0.0298	0.0207	0.0471	FALSE	FALSE	FALSE	G3mlEt	0.1217	0.8063	outcome	TRUE	reported	textfile	10	89640021	3645	0.08985	1.866e-06	1726	TRUE	reported	i50eTp	0.0207	2	TRUE	6021	0.00621546	22.7845	0.000301746
rs117004076	G	A	G	A	0.4784	0.2713	0.0147	0.0282	FALSE	FALSE	FALSE	G3mlEt	0.1695	0.1094	outcome	TRUE	reported	textfile	14	97702226	3645	0.1013	2.417e-06	1726	TRUE	reported	i50eTp	0.0147	2	TRUE	6021	0.00608158	22.2908	0.00613329
rs78044532	T	C	T	C	0.4192	-0.0932	0.0188	0.0229	FALSE	FALSE	FALSE	G3mlEt	0.1792	0.603	outcome	TRUE	reported	textfile	16	21168467	3645	0.08962	3.015e-06	1726	TRUE	reported	i50eTp	0.0188	2	TRUE	6021	0.00596673	21.8673	0.000755987
rs113812519	G	A	G	A	0.426	0.2238	0.0185	0.0185	FALSE	FALSE	FALSE	G3mlEt	0.2056	0.2764	outcome	TRUE	reported	textfile	1	207276336	3645	0.0915	3.339e-06	1726	TRUE	reported	i50eTp	0.0185	2	TRUE	6021	0.00591159	21.664	0.00267946
rs62524107	C	T	C	T	-0.2485	-0.0961	0.0527	0.0579	FALSE	FALSE	FALSE	G3mlEt	0.113	0.3947	outcome	TRUE	reported	textfile	8	141805137	3645	0.05349	3.525e-06	1726	TRUE	reported	i50eTp	0.0527	2	TRUE	6021	0.00588635	21.5709	0.00168609
rs34762764	T	C	T	C	0.1303	-0.0412	0.2642	0.266	FALSE	FALSE	FALSE	G3mlEt	0.0586	0.4819	outcome	TRUE	reported	textfile	1	47996882	3645	0.02818	3.921e-06	1726	TRUE	reported	i50eTp	0.2642	2	TRUE	6021	0.00583135	21.3682	0.0013097
rs118099810	T	C	T	C	0.2451	-0.0812	0.0572	0.0547	FALSE	FALSE	FALSE	G3mlEt	0.1317	0.5372	outcome	TRUE	reported	textfile	16	2406183	3645	0.05343	4.634e-06	1726	TRUE	reported	i50eTp	0.0572	2	TRUE	6021	0.00574009	21.0319	0.00120281
rs11733521	T	C	T	C	-0.2298	0.1426	0.0645	0.0301	FALSE	FALSE	FALSE	G3mlEt	0.1573	0.3646	outcome	TRUE	reported	textfile	4	68968349	3645	0.05013	4.7e-06	1726	TRUE	reported	i50eTp	0.0645	2	TRUE	6021	0.00573206	21.0023	0.00223092
rs73056862	T	C	T	C	0.2658	0.0984	0.0462	0.1019	FALSE	FALSE	FALSE	G3mlEt	0.083	0.2358	outcome	TRUE	reported	textfile	19	52235616	3645	0.05809	4.894e-06	1726	TRUE	reported	i50eTp	0.0462	2	TRUE	6021	0.00571113	20.9252	0.00398019
rs10738775	A	T	A	T	0.1169	-0.0627	0.3453	0.2934	FALSE	TRUE	FALSE	G3mlEt	0.0545	0.25	outcome	TRUE	reported	textfile	9	27514318	3645	0.02572	5.711e-06	1726	TRUE	reported	i50eTp	0.3453	2	TRUE	6021	0.00563554	20.6466	0.00401198
rs11051699	C	T	C	T	-0.1644	-0.0799	0.1387	0.1997	FALSE	FALSE	FALSE	G3mlEt	0.0632	0.2062	outcome	TRUE	reported	textfile	12	32107411	3645	0.03621	5.835e-06	1726	TRUE	reported	i50eTp	0.1387	2	TRUE	6021	0.00562341	20.6019	0.00505516
rs118033073	A	G	A	G	0.3019	0.3863	0.0353	0.021	FALSE	FALSE	FALSE	G3mlEt	0.2169	0.07488	outcome	TRUE	reported	textfile	8	9086777	3645	0.067	6.824e-06	1726	TRUE	reported	i50eTp	0.0353	2	TRUE	6021	0.00553945	20.2926	0.0139186
rs144392728	T	A	T	A	-0.2327	-0.1196	0.0588	0.029	FALSE	TRUE	FALSE	G3mlEt	0.1849	0.5176	outcome	TRUE	reported	textfile	22	33029820	3645	0.05175	7.142e-06	1726	TRUE	reported	i50eTp	0.0588	2	TRUE	6021	0.00551661	20.2085	0.00164251
rs74518629	T	C	T	C	-0.2768	-0.0152	0.0388	0.0316	FALSE	FALSE	FALSE	G3mlEt	0.1477	0.9182	outcome	TRUE	reported	textfile	12	130845523	3645	0.06178	7.703e-06	1726	TRUE	reported	i50eTp	0.0388	2	TRUE	6021	0.00547714	20.0631	0.000521535
rs148381451	T	C	T	C	-0.2511	-0.0573	0.0495	0.0313	FALSE	FALSE	FALSE	G3mlEt	0.1684	0.7337	outcome	TRUE	reported	textfile	17	63085557	3645	0.0561	7.827e-06	1726	TRUE	reported	i50eTp	0.0495	2	TRUE	6021	0.00546625	20.023	0.000899543
rs6602758	T	C	T	C	-0.2958	-0.0424	0.0342	0.0976	FALSE	FALSE	FALSE	G3mlEt	0.0846	0.6161	outcome	TRUE	reported	textfile	10	14778920	3645	0.06612	7.927e-06	1726	TRUE	reported	i50eTp	0.0342	2	TRUE	6021	0.00546078	20.0029	0.00128358
rs6567179	C	T	C	T	-0.1316	0.0762	0.2189	0.1667	FALSE	FALSE	FALSE	G3mlEt	0.0656	0.2459	outcome	TRUE	reported	textfile	18	58273913	3645	0.0295	8.409e-06	1726	TRUE	reported	i50eTp	0.2189	2	TRUE	6021	0.00543007	19.8898	0.00504394
rs7496584	C	A	C	A	0.1377	-0.0207	0.2011	0.7453	FALSE	FALSE	FALSE	G3mlEt	0.0636	0.7448	outcome	TRUE	reported	textfile	15	23877607	3645	0.03087	8.427e-06	1726	TRUE	reported	i50eTp	0.2011	2	TRUE	6021	0.00542916	19.8864	0.000909119
rs34488330	C	A	C	A	-0.473	0.136	0.0128	0.0313	FALSE	FALSE	FALSE	G3mlEt	0.1427	0.3407	outcome	TRUE	reported	textfile	19	7105841	3645	0.1062	8.759e-06	1726	TRUE	reported	i50eTp	0.0128	2	TRUE	6021	0.00541276	19.826	0.00342684
rs11764670	G	A	G	A	0.1182	0.0044	0.3189	0.6053	FALSE	FALSE	FALSE	G3mlEt	0.0553	0.9372	outcome	TRUE	reported	textfile	7	76455763	3645	0.02667	9.713e-06	1726	TRUE	reported	i50eTp	0.3189	2	TRUE	6021	0.00535991	19.6314	0.000569726
rs75382958	G	A	G	A	0.1534	0.0271	0.1455	0.0756	FALSE	FALSE	FALSE	G3mlEt	0.0984	0.7832	outcome	TRUE	reported	textfile	13	70194834	3645	0.03463	9.724e-06	1726	TRUE	reported	i50eTp	0.1455	2	TRUE	6021	0.00535447	19.6113	0.000888594
rs12451409	G	A	G	A	-0.1632	-0.1129	0.4456	0.5652	FALSE	FALSE	FALSE	ZyOVEt	0.0492	0.0218	outcome	TRUE	reported	textfile	17	45544856	1830	0.03336	1.091e-06	1727	TRUE	reported	ZZrbby	0.4456	2	TRUE	6021	0.0129091	23.9064	0.00153952
rs4074448	A	G	A	G	-0.1583	-0.0196	0.462	0.5681	FALSE	FALSE	FALSE	ZyOVEt	0.0493	0.6905	outcome	TRUE	reported	textfile	15	63888495	1830	0.03377	2.965e-06	1727	TRUE	reported	ZZrbby	0.462	2	TRUE	6021	0.0118649	21.9495	9.44272e-05
rs17637675	G	A	G	A	-0.1985	-0.0183	0.1855	0.1529	FALSE	FALSE	FALSE	ZyOVEt	0.0685	0.7892	outcome	TRUE	reported	textfile	16	79029574	1830	0.04294	4.051e-06	1727	TRUE	reported	ZZrbby	0.1855	2	TRUE	6021	0.0115426	21.3463	9.19335e-05
rs16939238	T	G	T	G	0.3682	-0.0783	0.0464	0.0601	FALSE	FALSE	FALSE	ZyOVEt	0.1091	0.4727	outcome	TRUE	reported	textfile	8	77030281	1830	0.07973	4.127e-06	1727	TRUE	reported	ZZrbby	0.0464	2	TRUE	6021	0.0115197	21.3034	0.000224687
rs78895027	C	T	C	T	0.2382	0.1588	0.1161	0.0764	FALSE	FALSE	FALSE	ZyOVEt	0.1016	0.1179	outcome	TRUE	reported	textfile	6	112306917	1830	0.05218	5.296e-06	1727	TRUE	reported	ZZrbby	0.1161	2	TRUE	6021	0.0112592	20.8162	0.00121466
rs113812519	G	A	G	A	0.5292	0.2238	0.0213	0.0185	FALSE	FALSE	FALSE	ZyOVEt	0.2056	0.2764	outcome	TRUE	reported	textfile	1	207276336	1830	0.1164	5.761e-06	1727	TRUE	reported	ZZrbby	0.0213	2	TRUE	6021	0.0111688	20.6471	0.000564418
rs402710	T	C	T	C	0.1545	-0.0716	0.3574	0.3518	FALSE	FALSE	FALSE	ZyOVEt	0.0511	0.1615	outcome	TRUE	reported	textfile	5	1320722	1830	0.03427	6.924e-06	1727	TRUE	reported	ZZrbby	0.3574	2	TRUE	6021	0.0109845	20.3027	0.0010979
rs6127744	T	G	T	G	0.209	0.0138	0.1536	0.1136	FALSE	FALSE	FALSE	ZyOVEt	0.0799	0.8628	outcome	TRUE	reported	textfile	20	54986274	1830	0.04666	7.936e-06	1727	TRUE	reported	ZZrbby	0.1536	2	TRUE	6021	0.0108447	20.0414	0.000127333
rs72716013	G	A	G	A	0.1538	-0.0625	0.3642	0.2614	FALSE	FALSE	FALSE	ZyOVEt	0.0563	0.2668	outcome	TRUE	reported	textfile	9	71165158	1830	0.03452	8.924e-06	1727	TRUE	reported	ZZrbby	0.3642	2	TRUE	6021	0.0107309	19.8288	0.000783691
rs80090296	T	C	T	C	0.175	0.0343	0.2372	0.1707	FALSE	FALSE	FALSE	ZyOVEt	0.0646	0.5954	outcome	TRUE	reported	textfile	18	42110459	1830	0.03939	9.467e-06	1727	TRUE	reported	ZZrbby	0.2372	2	TRUE	6021	0.0106707	19.7165	0.000286797
rs117004076	G	A	G	A	0.5709	0.2713	0.018	0.0282	FALSE	FALSE	FALSE	ZyOVEt	0.1695	0.1094	outcome	TRUE	reported	textfile	14	97702226	1830	0.1287	9.656e-06	1727	TRUE	reported	ZZrbby	0.018	2	TRUE	6021	0.0106382	19.6557	0.00190355
rs1687384	C	T	C	T	-0.1573	0.0348	0.3852	0.5909	FALSE	FALSE	FALSE	ZyOVEt	0.0522	0.5041	outcome	TRUE	reported	textfile	9	117088120	1830	0.03549	9.845e-06	1727	TRUE	reported	ZZrbby	0.3852	2	TRUE	6021	0.0106208	19.6232	0.000381879
rs113812519	G	A	G	A	0.7181	0.2238	0.0215	0.0185	FALSE	FALSE	FALSE	WhdCiQ	0.2056	0.2764	outcome	TRUE	reported	textfile	1	207276336	1833	0.116	7.392e-10	1728	TRUE	reported	utVLtw	0.0215	2	TRUE	6021	0.0204788	38.2807	1.08729e-06
rs144743804	A	G	A	G	0.6567	0.5584	0.0224	0.0181	FALSE	FALSE	FALSE	WhdCiQ	0.2625	0.03343	outcome	TRUE	reported	textfile	1	207018206	1833	0.1158	1.649e-08	1728	TRUE	reported	utVLtw	0.0224	2	TRUE	6021	0.0172425	32.125	8.73798e-05
rs4702668	G	A	G	A	0.1867	-0.1476	0.3331	0.6479	FALSE	FALSE	FALSE	WhdCiQ	0.0531	0.005479	outcome	TRUE	reported	textfile	5	10081219	1833	0.03558	1.714e-07	1728	TRUE	reported	utVLtw	0.3331	2	TRUE	6021	0.0147992	27.5044	0.00119346
rs78653777	T	C	T	C	0.2693	0.0552	0.1045	0.0696	FALSE	FALSE	FALSE	WhdCiQ	0.1007	0.5834	outcome	TRUE	reported	textfile	8	3472861	1833	0.05619	1.78e-06	1728	TRUE	reported	utVLtw	0.1045	2	TRUE	6021	0.0123761	22.9446	8.77047e-05
rs4900483	T	C	T	C	0.5564	0.0508	0.0188	0.102	FALSE	FALSE	FALSE	WhdCiQ	0.1082	0.6384	outcome	TRUE	reported	textfile	14	101566637	1833	0.1193	3.338e-06	1728	TRUE	reported	utVLtw	0.0188	2	TRUE	6021	0.0117276	21.728	0.00011898
rs10494895	G	A	G	A	0.4571	0.038	0.0314	0.0255	FALSE	FALSE	FALSE	WhdCiQ	0.1687	0.8218	outcome	TRUE	reported	textfile	1	208466901	1833	0.09801	3.328e-06	1728	TRUE	reported	utVLtw	0.0314	2	TRUE	6021	0.0117272	21.7274	7.3059e-05
rs11617402	C	T	C	T	-0.517	0.0108	0.0235	0.046	FALSE	FALSE	FALSE	WhdCiQ	0.1243	0.931	outcome	TRUE	reported	textfile	13	22970185	1833	0.1112	3.576e-06	1728	TRUE	reported	utVLtw	0.0235	2	TRUE	6021	0.0116551	21.5922	5.81335e-05
rs61610275	T	A	T	A	-0.4128	-0.3002	0.0387	0.0496	FALSE	TRUE	FALSE	WhdCiQ	0.1226	0.01437	outcome	TRUE	reported	textfile	17	13040257	1833	0.09024	5.09e-06	1728	TRUE	reported	utVLtw	0.0387	2	TRUE	6021	0.0112873	20.9029	0.00487792
rs80168996	C	A	C	A	-0.3078	-0.1013	0.0685	0.0454	FALSE	FALSE	FALSE	WhdCiQ	0.1384	0.4641	outcome	TRUE	reported	textfile	7	44882040	1833	0.06729	5.105e-06	1728	TRUE	reported	utVLtw	0.0685	2	TRUE	6021	0.0112861	20.9008	0.000268973
rs62037424	T	C	T	C	-0.643	0.202	0.015	0.0227	FALSE	FALSE	FALSE	WhdCiQ	0.2096	0.3351	outcome	TRUE	reported	textfile	16	28979854	1833	0.1411	5.544e-06	1728	TRUE	reported	utVLtw	0.015	2	TRUE	6021	0.0112024	20.7441	0.000437097
rs77518858	C	G	C	G	0.5456	0.193	0.0218	0.0351	FALSE	TRUE	FALSE	WhdCiQ	0.1642	0.2396	outcome	TRUE	reported	textfile	6	15735864	1833	0.1209	6.83e-06	1728	TRUE	reported	utVLtw	0.0218	2	TRUE	6021	0.0109884	20.3433	0.000735705
rs9945791	T	C	T	C	-0.2232	-0.1252	0.1383	0.9241	FALSE	FALSE	FALSE	WhdCiQ	0.0962	0.1933	outcome	TRUE	reported	textfile	18	36882371	1833	0.0495	6.935e-06	1728	TRUE	reported	utVLtw	0.1383	2	TRUE	6021	0.0109705	20.3097	0.000926949
rs11840245	T	C	T	C	0.4848	0.0717	0.0243	0.0199	FALSE	FALSE	FALSE	WhdCiQ	0.1865	0.7008	outcome	TRUE	reported	textfile	13	111300129	1833	0.1085	8.314e-06	1728	TRUE	reported	utVLtw	0.0243	2	TRUE	6021	0.0107745	19.9431	0.00020005
rs72999235	C	T	C	T	0.4734	-0.1539	0.0259	0.0211	FALSE	FALSE	FALSE	WhdCiQ	0.1808	0.3945	outcome	TRUE	reported	textfile	2	231874716	1833	0.1062	8.851e-06	1728	TRUE	reported	utVLtw	0.0259	2	TRUE	6021	0.0107241	19.8488	0.000493287
rs2419379	T	A	T	A	0.1678	-0.0673	0.3145	0.362	FALSE	TRUE	FALSE	WhdCiQ	0.0511	0.1878	outcome	TRUE	reported	textfile	1	190433277	1833	0.03766	8.832e-06	1728	TRUE	reported	utVLtw	0.3145	2	TRUE	6021	0.0107148	19.8312	0.00112293
rs113812519	G	A	G	A	0.6788	0.2238	0.0185	0.0185	FALSE	FALSE	FALSE	GqSJiv	0.2056	0.2764	outcome	TRUE	reported	textfile	1	207276336	3657	0.09244	2.552e-13	1729	TRUE	reported	hbD46V	0.0185	2	TRUE	6021	0.0145305	53.8922	3.24957e-07
rs144743804	A	G	A	G	0.6138	0.5584	0.0197	0.0181	FALSE	FALSE	FALSE	GqSJiv	0.2625	0.03343	outcome	TRUE	reported	textfile	1	207018206	3657	0.09002	1.072e-11	1729	TRUE	reported	hbD46V	0.0197	2	TRUE	6021	0.0125535	46.4663	4.92553e-05
rs62037424	T	C	T	C	-0.605	0.202	0.0135	0.0227	FALSE	FALSE	FALSE	GqSJiv	0.2096	0.3351	outcome	TRUE	reported	textfile	16	28979854	3657	0.1055	1.046e-08	1729	TRUE	reported	hbD46V	0.0135	2	TRUE	6021	0.00891236	32.8676	8.71663e-05
rs9880620	T	C	T	C	0.184	-0.0145	0.1658	0.2186	FALSE	FALSE	FALSE	GqSJiv	0.0586	0.8042	outcome	TRUE	reported	textfile	3	61111881	3657	0.03373	5.276e-08	1729	TRUE	reported	hbD46V	0.1658	2	TRUE	6021	0.00807158	29.7417	3.40556e-05
rs2026774	C	T	C	T	0.1679	0.0991	0.1648	0.8919	FALSE	FALSE	FALSE	GqSJiv	0.0794	0.212	outcome	TRUE	reported	textfile	1	86076069	3657	0.03358	6.036e-07	1729	TRUE	reported	hbD46V	0.1648	2	TRUE	6021	0.00678979	24.9863	0.00151426
rs117442206	T	C	T	C	-0.2889	0.1041	0.0481	0.034	FALSE	FALSE	FALSE	GqSJiv	0.1545	0.5004	outcome	TRUE	reported	textfile	12	25430787	3657	0.05856	8.405e-07	1729	TRUE	reported	hbD46V	0.0481	2	TRUE	6021	0.00661131	24.3251	0.000515563
rs59977691	A	G	A	G	0.2163	0.0706	0.0868	0.132	FALSE	FALSE	FALSE	GqSJiv	0.0739	0.3389	outcome	TRUE	reported	textfile	19	19012358	3657	0.044	9.261e-07	1729	TRUE	reported	hbD46V	0.0868	2	TRUE	6021	0.00656481	24.1529	0.00101711
rs12216684	A	G	A	G	0.2629	-0.1754	0.0543	0.0717	FALSE	FALSE	FALSE	GqSJiv	0.0986	0.07542	outcome	TRUE	reported	textfile	7	56291533	3657	0.05427	1.324e-06	1729	TRUE	reported	hbD46V	0.0543	2	TRUE	6021	0.00637615	23.4544	0.0064618
rs10737202	C	T	C	T	-0.1243	-0.0093	0.3389	0.3235	FALSE	FALSE	FALSE	GqSJiv	0.055	0.8659	outcome	TRUE	reported	textfile	1	234499381	3657	0.02655	2.926e-06	1729	TRUE	reported	hbD46V	0.3389	2	TRUE	6021	0.0059579	21.9066	0.000337271
rs34488330	C	A	C	A	-0.497	0.136	0.0127	0.0313	FALSE	FALSE	FALSE	GqSJiv	0.1427	0.3407	outcome	TRUE	reported	textfile	19	7105841	3657	0.1076	4.017e-06	1729	TRUE	reported	hbD46V	0.0127	2	TRUE	6021	0.00580012	21.3231	0.00226049
rs13030427	A	G	A	G	0.1463	0.0202	0.1957	0.1482	FALSE	FALSE	FALSE	GqSJiv	0.0697	0.7713	outcome	TRUE	reported	textfile	2	208879261	3657	0.03178	4.289e-06	1729	TRUE	reported	hbD46V	0.1957	2	TRUE	6021	0.00576164	21.1808	0.000562345
rs137949497	G	T	G	T	0.4609	0.2324	0.0146	0.0393	FALSE	FALSE	FALSE	GqSJiv	0.1515	0.1251	outcome	TRUE	reported	textfile	21	32136760	3657	0.1025	7.154e-06	1729	TRUE	reported	hbD46V	0.0146	2	TRUE	6021	0.00549852	20.2082	0.00931036
rs2204990	A	G	A	G	-0.1141	-0.0483	0.4225	0.5519	FALSE	FALSE	FALSE	GqSJiv	0.0494	0.329	outcome	TRUE	reported	textfile	14	22791563	3657	0.02547	7.676e-06	1729	TRUE	reported	hbD46V	0.4225	2	TRUE	6021	0.00545773	20.0575	0.00339994
rs113343814	A	G	A	G	-0.2372	-0.0419	0.0536	0.0222	FALSE	FALSE	FALSE	GqSJiv	0.1977	0.832	outcome	TRUE	reported	textfile	16	28088993	3657	0.05316	8.376e-06	1729	TRUE	reported	hbD46V	0.0536	2	TRUE	6021	0.00541473	19.8986	0.000709941
rs67316035	A	T	A	T	-0.1824	-0.0774	0.1036	0.2117	FALSE	TRUE	FALSE	GqSJiv	0.0603	0.199	outcome	TRUE	reported	textfile	11	132221605	3657	0.04093	8.522e-06	1729	TRUE	reported	hbD46V	0.1036	2	TRUE	6021	0.00540119	19.8485	0.00647502
rs72721695	A	C	A	C	0.1767	-0.0189	0.1102	0.1614	FALSE	FALSE	FALSE	GqSJiv	0.0732	0.7957	outcome	TRUE	reported	textfile	4	153625808	3657	0.03976	9.096e-06	1729	TRUE	reported	hbD46V	0.1102	2	TRUE	6021	0.00537175	19.7398	0.000828031
rs148381451	T	C	T	C	-0.2516	-0.0573	0.0496	0.0313	FALSE	FALSE	FALSE	GqSJiv	0.1684	0.7337	outcome	TRUE	reported	textfile	17	63085557	3657	0.05674	9.509e-06	1729	TRUE	reported	hbD46V	0.0496	2	TRUE	6021	0.00534797	19.6519	0.00101973
rs113812519	G	A	G	A	0.5583	0.2238	0.0185	0.0185	FALSE	FALSE	FALSE	u82gAB	0.2056	0.2764	outcome	TRUE	reported	textfile	1	207276336	3657	0.09163	1.223e-09	1730	TRUE	reported	rApBeK	0.0185	2	TRUE	6021	0.0100496	37.1041	3.65263e-05
rs144743804	A	G	A	G	0.5079	0.5584	0.0197	0.0181	FALSE	FALSE	FALSE	u82gAB	0.2625	0.03343	outcome	TRUE	reported	textfile	1	207018206	3657	0.0892	1.336e-08	1730	TRUE	reported	rApBeK	0.0197	2	TRUE	6021	0.00878756	32.4033	0.00148838
rs754067	C	T	C	T	-0.2058	0.0594	0.1143	0.2004	FALSE	FALSE	FALSE	u82gAB	0.0638	0.3519	outcome	TRUE	reported	textfile	16	17323672	3657	0.0388	1.205e-07	1730	TRUE	reported	rApBeK	0.1143	2	TRUE	6021	0.00763438	28.1183	0.00031121
rs2904880	G	C	G	C	0.1255	0.0135	0.4032	0.3159	FALSE	TRUE	FALSE	u82gAB	0.053	0.7987	outcome	TRUE	reported	textfile	16	28944396	3657	0.02512	6.077e-07	1730	TRUE	reported	rApBeK	0.4032	2	TRUE	6021	0.00677905	24.9466	0.000157263
rs12216684	A	G	A	G	0.2624	-0.1754	0.0543	0.0717	FALSE	FALSE	FALSE	u82gAB	0.0986	0.07542	outcome	TRUE	reported	textfile	7	56291533	3657	0.05367	1.058e-06	1730	TRUE	reported	rApBeK	0.0543	2	TRUE	6021	0.00649397	23.8906	0.00580443
rs1955142	C	A	C	A	0.124	-0.0233	0.3551	0.5945	FALSE	FALSE	FALSE	u82gAB	0.0502	0.6428	outcome	TRUE	reported	textfile	15	65505785	3657	0.02605	2.023e-06	1730	TRUE	reported	rApBeK	0.3551	2	TRUE	6021	0.00615773	22.6459	0.000530002
rs1290397	A	G	A	G	0.1153	-0.0223	0.49	0.5181	FALSE	FALSE	FALSE	u82gAB	0.0509	0.6611	outcome	TRUE	reported	textfile	17	77948063	3657	0.02452	2.673e-06	1730	TRUE	reported	rApBeK	0.49	2	TRUE	6021	0.00601	22.0994	0.000591086
rs1345010	G	T	G	T	0.1933	0.0868	0.0946	0.0821	FALSE	FALSE	FALSE	u82gAB	0.0897	0.3332	outcome	TRUE	reported	textfile	2	174113733	3657	0.04163	3.553e-06	1730	TRUE	reported	rApBeK	0.0946	2	TRUE	6021	0.00586102	21.5483	0.00218523
rs76289004	G	A	G	A	-0.4991	-0.1067	0.0139	0.0267	FALSE	FALSE	FALSE	u82gAB	0.1603	0.5057	outcome	TRUE	reported	textfile	10	67011620	3657	0.1075	3.519e-06	1730	TRUE	reported	rApBeK	0.0139	2	TRUE	6021	0.00585977	21.5437	0.00115785
rs764603	C	A	C	A	0.4986	0.0315	0.0131	0.0166	FALSE	FALSE	FALSE	u82gAB	0.2224	0.8875	outcome	TRUE	reported	textfile	6	36793516	3657	0.1074	3.59e-06	1730	TRUE	reported	rApBeK	0.0131	2	TRUE	6021	0.00585894	21.5406	0.000355838
rs148381451	T	C	T	C	-0.257	-0.0573	0.0496	0.0313	FALSE	FALSE	FALSE	u82gAB	0.1684	0.7337	outcome	TRUE	reported	textfile	17	63085557	3657	0.05611	4.804e-06	1730	TRUE	reported	rApBeK	0.0496	2	TRUE	6021	0.00570396	20.9676	0.000674163
rs80273434	C	G	C	G	-0.2461	-0.1263	0.0535	0.0679	FALSE	TRUE	FALSE	u82gAB	0.1051	0.2297	outcome	TRUE	reported	textfile	8	141772905	3657	0.05384	5.02e-06	1730	TRUE	reported	rApBeK	0.0535	2	TRUE	6021	0.00568086	20.8822	0.00419496
rs12642193	G	A	G	A	-0.1521	0.084	0.1575	0.2644	FALSE	FALSE	FALSE	u82gAB	0.0559	0.1331	outcome	TRUE	reported	textfile	4	25916457	3657	0.03353	5.882e-06	1730	TRUE	reported	rApBeK	0.1575	2	TRUE	6021	0.00559538	20.5662	0.00802853
rs67316035	A	T	A	T	-0.1835	-0.0774	0.1036	0.2117	FALSE	TRUE	FALSE	u82gAB	0.0603	0.199	outcome	TRUE	reported	textfile	11	132221605	3657	0.04047	5.986e-06	1730	TRUE	reported	rApBeK	0.1036	2	TRUE	6021	0.00559044	20.5479	0.00537061
rs79699942	G	A	G	A	0.1807	-0.0002	0.1107	0.1319	FALSE	FALSE	FALSE	u82gAB	0.0725	0.9974	outcome	TRUE	reported	textfile	12	44929593	3657	0.04005	6.662e-06	1730	TRUE	reported	rApBeK	0.1107	2	TRUE	6021	0.00553574	20.3457	0.000380161
rs1449311	A	G	A	G	0.122	0.0672	0.3074	0.2889	FALSE	FALSE	FALSE	u82gAB	0.055	0.2222	outcome	TRUE	reported	textfile	3	100703124	3657	0.02712	7.034e-06	1730	TRUE	reported	rApBeK	0.3074	2	TRUE	6021	0.00550324	20.2257	0.00520927
rs2903728	C	T	C	T	-0.1719	0.07	0.1147	0.2171	FALSE	FALSE	FALSE	u82gAB	0.0598	0.2417	outcome	TRUE	reported	textfile	19	56408295	3657	0.03879	9.584e-06	1730	TRUE	reported	rApBeK	0.1147	2	TRUE	6021	0.00534148	19.6279	0.00556074
rs1453509	A	C	A	C	-0.1879	0.0614	0.1181	0.2294	FALSE	FALSE	FALSE	juXGMY	0.0589	0.2972	outcome	TRUE	reported	textfile	16	17014673	3655	0.03799	7.904e-07	1731	TRUE	reported	1JSj60	0.1181	2	TRUE	6021	0.0066486	24.4499	0.00112827
rs12968867	A	G	A	G	-0.1275	0.0137	0.3257	0.7211	FALSE	FALSE	FALSE	juXGMY	0.0545	0.8022	outcome	TRUE	reported	textfile	18	60850310	3655	0.02628	1.283e-06	1731	TRUE	reported	1JSj60	0.3257	2	TRUE	6021	0.00639874	23.5251	0.000244211
rs76451648	C	T	C	T	0.2777	-0.0198	0.0469	0.0527	FALSE	FALSE	FALSE	juXGMY	0.1143	0.8623	outcome	TRUE	reported	textfile	4	139618949	3655	0.05834	2.003e-06	1731	TRUE	reported	1JSj60	0.0469	2	TRUE	6021	0.00616095	22.6455	0.000268147
rs71307996	A	G	A	G	0.3537	0.2016	0.0272	0.0259	FALSE	FALSE	FALSE	juXGMY	0.1908	0.2907	outcome	TRUE	reported	textfile	3	1103352	3655	0.07444	2.106e-06	1731	TRUE	reported	1JSj60	0.0272	2	TRUE	6021	0.00613897	22.5642	0.00196982
rs16884870	C	T	C	T	0.2135	0.0222	0.0795	0.0715	FALSE	FALSE	FALSE	juXGMY	0.0991	0.823	outcome	TRUE	reported	textfile	6	75109409	3655	0.04578	3.213e-06	1731	TRUE	reported	1JSj60	0.0795	2	TRUE	6021	0.00591535	21.7373	0.000404326
rs7332415	G	A	G	A	-0.2327	-0.0504	0.0648	0.0902	FALSE	FALSE	FALSE	juXGMY	0.0908	0.5785	outcome	TRUE	reported	textfile	13	41688557	3655	0.04996	3.295e-06	1731	TRUE	reported	1JSj60	0.0648	2	TRUE	6021	0.00590052	21.6825	0.000870981
rs10906006	A	G	A	G	0.1265	-0.0924	0.2752	0.7216	FALSE	FALSE	FALSE	juXGMY	0.0541	0.08754	outcome	TRUE	reported	textfile	10	11781967	3655	0.0272	3.421e-06	1731	TRUE	reported	1JSj60	0.2752	2	TRUE	6021	0.00588293	21.6175	0.00891386
rs73056862	T	C	T	C	0.2705	0.0984	0.0461	0.1019	FALSE	FALSE	FALSE	juXGMY	0.083	0.2358	outcome	TRUE	reported	textfile	19	52235616	3655	0.05845	3.821e-06	1731	TRUE	reported	1JSj60	0.0461	2	TRUE	6021	0.0058256	21.4056	0.00351913
rs1164128	C	T	C	T	0.1146	-0.0692	0.3759	0.4422	FALSE	FALSE	FALSE	juXGMY	0.0488	0.1562	outcome	TRUE	reported	textfile	13	112057432	3655	0.02511	5.18e-06	1731	TRUE	reported	1JSj60	0.3759	2	TRUE	6021	0.00566657	20.818	0.00642676
rs10192011	T	G	T	G	0.1236	-0.1002	0.29	0.1787	FALSE	FALSE	FALSE	juXGMY	0.0637	0.116	outcome	TRUE	reported	textfile	2	53804261	3655	0.02711	5.323e-06	1731	TRUE	reported	1JSj60	0.29	2	TRUE	6021	0.00565494	20.775	0.00863295
rs2613786	A	G	A	G	-0.1142	-0.0143	0.3739	0.4845	FALSE	FALSE	FALSE	juXGMY	0.0488	0.7699	outcome	TRUE	reported	textfile	19	5137846	3655	0.02536	6.978e-06	1731	TRUE	reported	1JSj60	0.3739	2	TRUE	6021	0.00551751	20.2673	0.000755417
rs76709166	C	A	C	A	-0.4372	0.11	0.0166	0.0176	FALSE	FALSE	FALSE	juXGMY	0.2151	0.6091	outcome	TRUE	reported	textfile	13	20589957	3655	0.0975	7.566e-06	1731	TRUE	reported	1JSj60	0.0166	2	TRUE	6021	0.00547118	20.0962	0.00128427
rs17315418	A	G	A	G	0.1196	-0.0703	0.3174	0.3359	FALSE	FALSE	FALSE	juXGMY	0.0518	0.1751	outcome	TRUE	reported	textfile	15	70028833	3655	0.02669	7.695e-06	1731	TRUE	reported	1JSj60	0.3174	2	TRUE	6021	0.00546385	20.0691	0.00698781
rs11643297	G	A	G	A	0.114	-0.0352	0.3888	0.6984	FALSE	FALSE	FALSE	juXGMY	0.0533	0.5093	outcome	TRUE	reported	textfile	16	28973268	3655	0.02546	7.721e-06	1731	TRUE	reported	1JSj60	0.3888	2	TRUE	6021	0.00545544	20.038	0.00179143
rs10928415	A	G	A	G	0.1356	-0.0548	0.2083	0.7416	FALSE	FALSE	FALSE	juXGMY	0.057	0.3371	outcome	TRUE	reported	textfile	2	149553139	3655	0.03043	8.557e-06	1731	TRUE	reported	1JSj60	0.2083	2	TRUE	6021	0.0054035	19.8462	0.00348967
rs631691	T	C	T	C	-0.1105	0.1039	0.48	0.5127	FALSE	FALSE	FALSE	juXGMY	0.0492	0.03456	outcome	TRUE	reported	textfile	3	124875178	3655	0.02487	9.086e-06	1731	TRUE	reported	1JSj60	0.48	2	TRUE	6021	0.00537213	19.7304	0.0275281
rs75663256	A	C	A	C	0.1904	-0.0597	0.0896	0.1577	FALSE	FALSE	FALSE	juXGMY	0.0675	0.3763	outcome	TRUE	reported	textfile	8	69895735	3655	0.04286	9.174e-06	1731	TRUE	reported	1JSj60	0.0896	2	TRUE	6021	0.00537036	19.7239	0.00310232
rs75656751	T	C	T	C	-0.3513	0.1722	0.0246	0.0377	FALSE	FALSE	FALSE	juXGMY	0.132	0.1921	outcome	TRUE	reported	textfile	21	38055091	3655	0.07924	9.527e-06	1731	TRUE	reported	1JSj60	0.0246	2	TRUE	6021	0.00534873	19.644	0.00709806
rs73254441	A	G	A	G	0.3945	0.1147	0.0201	0.049	FALSE	FALSE	FALSE	juXGMY	0.1167	0.3257	outcome	TRUE	reported	textfile	5	113295200	3655	0.08906	9.746e-06	1731	TRUE	reported	1JSj60	0.0201	2	TRUE	6021	0.00533969	19.6106	0.00389066
rs12968867	A	G	A	G	-0.137	0.0137	0.3256	0.7211	FALSE	FALSE	FALSE	Wt1cH9	0.0545	0.8022	outcome	TRUE	reported	textfile	18	60850310	3656	0.02626	1.923e-07	1732	TRUE	reported	YXP4kN	0.3256	2	TRUE	6021	0.00738966	27.2028	7.64375e-05
rs34205222	A	G	A	G	0.3581	0.3079	0.0279	0.0281	FALSE	FALSE	FALSE	Wt1cH9	0.186	0.09781	outcome	TRUE	reported	textfile	3	1066077	3656	0.07346	1.138e-06	1732	TRUE	reported	YXP4kN	0.0279	2	TRUE	6021	0.00645783	23.7503	0.00475004
rs115952864	A	G	A	G	0.414	0.2286	0.0208	0.0196	FALSE	FALSE	FALSE	Wt1cH9	0.2052	0.2651	outcome	TRUE	reported	textfile	4	173244216	3656	0.08576	1.436e-06	1732	TRUE	reported	YXP4kN	0.0208	2	TRUE	6021	0.00633382	23.2913	0.00181514
rs2904880	G	C	G	C	0.1212	0.0135	0.4032	0.3159	FALSE	TRUE	FALSE	Wt1cH9	0.053	0.7987	outcome	TRUE	reported	textfile	16	28944396	3656	0.02513	1.466e-06	1732	TRUE	reported	YXP4kN	0.4032	2	TRUE	6021	0.00632208	23.2478	0.000269012
rs144574165	T	C	T	C	0.2567	0.1225	0.0581	0.0173	FALSE	FALSE	FALSE	Wt1cH9	0.2142	0.5672	outcome	TRUE	reported	textfile	4	163336202	3656	0.05347	1.639e-06	1732	TRUE	reported	YXP4kN	0.0581	2	TRUE	6021	0.00626464	23.0353	0.000601018
rs1524155	A	T	A	T	0.1482	-0.0413	0.1921	0.3659	FALSE	TRUE	FALSE	Wt1cH9	0.0513	0.4211	outcome	TRUE	reported	textfile	2	48878727	3656	0.03114	2.002e-06	1732	TRUE	reported	YXP4kN	0.1921	2	TRUE	6021	0.00615702	22.6371	0.00113352
rs10821075	A	G	A	G	-0.1158	0.0154	0.4393	0.4916	FALSE	FALSE	FALSE	Wt1cH9	0.049	0.7528	outcome	TRUE	reported	textfile	9	95896099	3656	0.02466	2.731e-06	1732	TRUE	reported	YXP4kN	0.4393	2	TRUE	6021	0.00599533	22.0391	0.000453302
rs113612962	C	G	C	G	-0.2905	0.0368	0.0402	0.0526	FALSE	TRUE	FALSE	Wt1cH9	0.1209	0.7609	outcome	TRUE	reported	textfile	22	43167446	3656	0.06279	3.848e-06	1732	TRUE	reported	YXP4kN	0.0402	2	TRUE	6021	0.00582063	21.3931	0.000543198
rs75663256	A	C	A	C	0.1981	-0.0597	0.0896	0.1577	FALSE	FALSE	FALSE	Wt1cH9	0.0675	0.3763	outcome	TRUE	reported	textfile	8	69895735	3656	0.04284	3.914e-06	1732	TRUE	reported	YXP4kN	0.0896	2	TRUE	6021	0.00581475	21.3714	0.00193398
rs116412781	T	C	T	C	0.2691	-0.0252	0.0475	0.0248	FALSE	FALSE	FALSE	Wt1cH9	0.1695	0.882	outcome	TRUE	reported	textfile	4	2746567	3656	0.05837	4.175e-06	1732	TRUE	reported	YXP4kN	0.0475	2	TRUE	6021	0.00577995	21.2427	0.000398042
rs6577565	C	T	C	T	-0.1228	0.0359	0.3177	0.7641	FALSE	FALSE	FALSE	Wt1cH9	0.0584	0.5382	outcome	TRUE	reported	textfile	1	6307255	3656	0.02666	4.235e-06	1732	TRUE	reported	YXP4kN	0.3177	2	TRUE	6021	0.00576975	21.205	0.00114696
rs7608595	C	T	C	T	0.1193	0.0404	0.3325	0.5767	FALSE	FALSE	FALSE	Wt1cH9	0.0498	0.4177	outcome	TRUE	reported	textfile	2	223088415	3656	0.02609	4.966e-06	1732	TRUE	reported	YXP4kN	0.3325	2	TRUE	6021	0.00568656	20.8975	0.00190519
rs59102092	C	A	C	A	-0.1649	-0.0932	0.1368	0.1425	FALSE	FALSE	FALSE	Wt1cH9	0.0727	0.2001	outcome	TRUE	reported	textfile	1	39551423	3656	0.03615	5.231e-06	1732	TRUE	reported	YXP4kN	0.1368	2	TRUE	6021	0.00565918	20.7963	0.00500599
rs148390689	C	T	C	T	-0.4166	-0.0647	0.0186	0.0209	FALSE	FALSE	FALSE	Wt1cH9	0.2018	0.7486	outcome	TRUE	reported	textfile	13	20089809	3656	0.09136	5.269e-06	1732	TRUE	reported	YXP4kN	0.0186	2	TRUE	6021	0.00565532	20.7821	0.000683327
rs142291539	A	G	A	G	0.3565	0.2025	0.0269	0.0247	FALSE	FALSE	FALSE	Wt1cH9	0.181	0.2633	outcome	TRUE	reported	textfile	5	175612761	3656	0.07821	5.317e-06	1732	TRUE	reported	YXP4kN	0.0269	2	TRUE	6021	0.00565102	20.7662	0.00368045
rs631691	T	C	T	C	-0.1133	0.1039	0.4799	0.5127	FALSE	FALSE	FALSE	Wt1cH9	0.0492	0.03456	outcome	TRUE	reported	textfile	3	124875178	3656	0.02486	5.362e-06	1732	TRUE	reported	YXP4kN	0.4799	2	TRUE	6021	0.00564925	20.7596	0.0218105
rs10216993	T	C	T	C	-0.1112	0.0003	0.4624	0.4515	FALSE	FALSE	FALSE	Wt1cH9	0.0489	0.9952	outcome	TRUE	reported	textfile	8	142521360	3656	0.02458	6.255e-06	1732	TRUE	reported	YXP4kN	0.4624	2	TRUE	6021	0.00556692	20.4554	0.00036924
rs114723901	A	G	A	G	-0.2039	-0.0637	0.0873	0.0691	FALSE	FALSE	FALSE	Wt1cH9	0.1065	0.5495	outcome	TRUE	reported	textfile	15	45169337	3656	0.04525	6.801e-06	1732	TRUE	reported	YXP4kN	0.0873	2	TRUE	6021	0.00552314	20.2936	0.00145633
rs10192011	T	G	T	G	0.1217	-0.1002	0.2899	0.1787	FALSE	FALSE	FALSE	Wt1cH9	0.0637	0.116	outcome	TRUE	reported	textfile	2	53804261	3656	0.02711	7.445e-06	1732	TRUE	reported	YXP4kN	0.2899	2	TRUE	6021	0.00548187	20.1412	0.0101444
rs12636323	T	G	T	G	0.1142	-0.0285	0.3952	0.4772	FALSE	FALSE	FALSE	Wt1cH9	0.0495	0.5649	outcome	TRUE	reported	textfile	3	100795543	3656	0.02557	8.124e-06	1732	TRUE	reported	YXP4kN	0.3952	2	TRUE	6021	0.00542627	19.9358	0.00154762
rs9350187	T	C	T	C	-0.2277	0.0132	0.0607	0.0763	FALSE	FALSE	FALSE	Wt1cH9	0.0934	0.8879	outcome	TRUE	reported	textfile	6	19794487	3656	0.05119	8.953e-06	1732	TRUE	reported	YXP4kN	0.0607	2	TRUE	6021	0.00538277	19.7751	0.000629933
rs71555251	A	G	A	G	0.2028	0.022	0.0796	0.0715	FALSE	FALSE	FALSE	Wt1cH9	0.0991	0.824	outcome	TRUE	reported	textfile	6	75109171	3656	0.04575	9.578e-06	1732	TRUE	reported	YXP4kN	0.0796	2	TRUE	6021	0.00534588	19.6389	0.000788674
rs7189927	C	T	C	T	0.1434	-0.0357	0.4018	0.654	FALSE	FALSE	FALSE	V2HGJi	0.0515	0.4883	outcome	TRUE	reported	textfile	16	28913787	3657	0.025	1.066e-08	1733	TRUE	reported	3OLVcF	0.4018	2	TRUE	6021	0.00891669	32.8837	4.29232e-05
rs113612962	C	G	C	G	-0.3129	0.0368	0.0402	0.0526	FALSE	TRUE	FALSE	V2HGJi	0.1209	0.7609	outcome	TRUE	reported	textfile	22	43167446	3657	0.06277	6.468e-07	1733	TRUE	reported	3OLVcF	0.0402	2	TRUE	6021	0.00674902	24.8353	0.000184006
rs12346584	C	T	C	T	0.136	-0.0525	0.2743	0.286	FALSE	FALSE	FALSE	V2HGJi	0.0557	0.3459	outcome	TRUE	reported	textfile	9	97103437	3657	0.02791	1.146e-06	1733	TRUE	reported	3OLVcF	0.2743	2	TRUE	6021	0.00645093	23.7312	0.00111518
rs12904834	C	T	C	T	-0.1252	0.0103	0.3675	0.5603	FALSE	FALSE	FALSE	V2HGJi	0.0498	0.8365	outcome	TRUE	reported	textfile	15	76897663	3657	0.02593	1.436e-06	1733	TRUE	reported	3OLVcF	0.3675	2	TRUE	6021	0.00633459	23.3005	0.000236025
rs67145622	T	C	T	C	-0.2671	-0.0044	0.0476	0.1032	FALSE	FALSE	FALSE	V2HGJi	0.0856	0.9588	outcome	TRUE	reported	textfile	6	19588752	3657	0.05641	2.265e-06	1733	TRUE	reported	3OLVcF	0.0476	2	TRUE	6021	0.00609335	22.4077	0.000216409
rs112978597	G	A	G	A	0.2426	0.0018	0.06	0.0346	FALSE	FALSE	FALSE	V2HGJi	0.171	0.9918	outcome	TRUE	reported	textfile	1	12881809	3657	0.05151	2.579e-06	1733	TRUE	reported	3OLVcF	0.06	2	TRUE	6021	0.00602903	22.1698	0.000211936
rs5762000	T	C	T	C	0.1472	-0.0644	0.1854	0.2198	FALSE	FALSE	FALSE	V2HGJi	0.0645	0.3182	outcome	TRUE	reported	textfile	22	27530934	3657	0.03135	2.769e-06	1733	TRUE	reported	3OLVcF	0.1854	2	TRUE	6021	0.00599246	22.0345	0.00202955
rs10761194	A	G	A	G	-0.1148	0.0156	0.4403	0.4914	FALSE	FALSE	FALSE	V2HGJi	0.0487	0.7491	outcome	TRUE	reported	textfile	9	95899884	3657	0.02474	3.561e-06	1733	TRUE	reported	3OLVcF	0.4403	2	TRUE	6021	0.00585342	21.5202	0.000541605
rs75663256	A	C	A	C	0.1984	-0.0597	0.0896	0.1577	FALSE	FALSE	FALSE	V2HGJi	0.0675	0.3763	outcome	TRUE	reported	textfile	8	69895735	3657	0.04284	3.771e-06	1733	TRUE	reported	3OLVcF	0.0896	2	TRUE	6021	0.00583069	21.4362	0.00189983
rs72877897	A	T	A	T	0.1711	0.0531	0.1261	0.1127	FALSE	TRUE	FALSE	V2HGJi	0.0757	0.4833	outcome	TRUE	reported	textfile	3	61116118	3657	0.03753	5.269e-06	1733	TRUE	reported	3OLVcF	0.1261	2	TRUE	6021	0.00565141	20.7733	0.00157138
rs2613786	A	G	A	G	-0.115	-0.0143	0.3737	0.4845	FALSE	FALSE	FALSE	V2HGJi	0.0488	0.7699	outcome	TRUE	reported	textfile	19	5137846	3657	0.02536	5.991e-06	1733	TRUE	reported	3OLVcF	0.3737	2	TRUE	6021	0.00559161	20.5523	0.000691192
rs12554596	G	A	G	A	-0.1151	0.0314	0.3891	0.2119	FALSE	FALSE	FALSE	V2HGJi	0.0632	0.6186	outcome	TRUE	reported	textfile	9	37002142	3657	0.02548	6.514e-06	1733	TRUE	reported	3OLVcF	0.3891	2	TRUE	6021	0.00554894	20.3946	0.00113758
rs190416390	A	G	A	G	0.2145	0.0922	0.0708	0.0487	FALSE	FALSE	FALSE	V2HGJi	0.1183	0.4361	outcome	TRUE	reported	textfile	2	159567199	3657	0.04777	7.335e-06	1733	TRUE	reported	3OLVcF	0.0708	2	TRUE	6021	0.00548316	20.1515	0.00221925
rs964936	T	G	T	G	-0.1111	0.0068	0.4554	0.4478	FALSE	FALSE	FALSE	V2HGJi	0.049	0.8891	outcome	TRUE	reported	textfile	8	142522071	3657	0.02477	7.488e-06	1733	TRUE	reported	3OLVcF	0.4554	2	TRUE	6021	0.00547102	20.1066	0.000562723
rs10420460	C	T	C	T	-0.1105	-0.0154	0.4629	0.6855	FALSE	FALSE	FALSE	V2HGJi	0.0521	0.7677	outcome	TRUE	reported	textfile	19	57259311	3657	0.02465	7.641e-06	1733	TRUE	reported	3OLVcF	0.4629	2	TRUE	6021	0.00546495	20.0841	0.000806286
rs16884870	C	T	C	T	0.2031	0.0222	0.0794	0.0715	FALSE	FALSE	FALSE	V2HGJi	0.0991	0.823	outcome	TRUE	reported	textfile	6	75109409	3657	0.04582	9.524e-06	1733	TRUE	reported	3OLVcF	0.0794	2	TRUE	6021	0.00534389	19.6369	0.000793273
rs112522781	A	G	A	G	0.2712	0.0947	0.0442	0.0801	FALSE	FALSE	FALSE	V2HGJi	0.0927	0.3069	outcome	TRUE	reported	textfile	10	89650801	3657	0.06119	9.635e-06	1733	TRUE	reported	3OLVcF	0.0442	2	TRUE	6021	0.00534278	19.6327	0.00417528
rs1164128	C	T	C	T	0.1113	-0.0692	0.376	0.4422	FALSE	FALSE	FALSE	V2HGJi	0.0488	0.1562	outcome	TRUE	reported	textfile	13	112057432	3657	0.02512	9.674e-06	1733	TRUE	reported	3OLVcF	0.376	2	TRUE	6021	0.0053395	19.6207	0.0087955
rs117553718	A	G	A	G	0.5498	-0.034	0.0138	0.051	FALSE	FALSE	FALSE	SnNOWr	0.1384	0.8059	outcome	TRUE	reported	textfile	10	5865812	3658	0.1088	4.575e-07	1734	TRUE	reported	cRXotl	0.0138	2	TRUE	6021	0.00693245	25.522	0.000128307
rs10752607	A	G	A	G	0.1478	0.0285	0.2172	0.7912	FALSE	FALSE	FALSE	SnNOWr	0.0612	0.6415	outcome	TRUE	reported	textfile	1	154716803	3658	0.02969	6.758e-07	1734	TRUE	reported	cRXotl	0.2172	2	TRUE	6021	0.00672903	24.768	0.000277607
rs4968431	G	T	G	T	0.1321	-0.0562	0.3198	0.3948	FALSE	FALSE	FALSE	SnNOWr	0.0504	0.2645	outcome	TRUE	reported	textfile	17	59421778	3658	0.0266	7.127e-07	1734	TRUE	reported	cRXotl	0.3198	2	TRUE	6021	0.006697	24.6493	0.00125168
rs12374328	A	T	A	T	-0.2445	0.2202	0.0685	0.0474	FALSE	TRUE	FALSE	SnNOWr	0.1469	0.1337	outcome	TRUE	reported	textfile	4	61352640	3658	0.05123	1.886e-06	1734	TRUE	reported	cRXotl	0.0685	2	TRUE	6021	0.00618827	22.7652	0.00452926
rs75117490	G	A	G	A	0.1912	0.1238	0.1027	0.0535	FALSE	FALSE	FALSE	SnNOWr	0.1116	0.2674	outcome	TRUE	reported	textfile	18	58322970	3658	0.04025	2.112e-06	1734	TRUE	reported	cRXotl	0.1027	2	TRUE	6021	0.00613097	22.5531	0.0022083
rs254079	G	A	G	A	0.125	-0.0336	0.314	0.6081	FALSE	FALSE	FALSE	SnNOWr	0.0506	0.5065	outcome	TRUE	reported	textfile	5	115891083	3658	0.02664	2.803e-06	1734	TRUE	reported	cRXotl	0.314	2	TRUE	6021	0.00598276	22.0046	0.00100663
rs147763919	C	A	C	A	0.2034	-0.3297	0.0854	0.0353	FALSE	FALSE	FALSE	SnNOWr	0.19	0.08276	outcome	TRUE	reported	textfile	8	62358083	3658	0.04414	4.188e-06	1734	TRUE	reported	cRXotl	0.0854	2	TRUE	6021	0.00577138	21.2227	0.0103423
rs6805030	A	C	A	C	-0.3596	-0.137	0.026	0.0513	FALSE	FALSE	FALSE	SnNOWr	0.1249	0.2726	outcome	TRUE	reported	textfile	3	54576549	3658	0.07811	4.301e-06	1734	TRUE	reported	cRXotl	0.026	2	TRUE	6021	0.00576067	21.1831	0.00314598
rs72816772	T	C	T	C	0.225	0.1512	0.0653	0.0407	FALSE	FALSE	FALSE	SnNOWr	0.1316	0.2503	outcome	TRUE	reported	textfile	2	75815457	3658	0.04921	4.981e-06	1734	TRUE	reported	cRXotl	0.0653	2	TRUE	6021	0.0056825	20.894	0.00377568
rs72998964	A	G	A	G	-0.2264	-0.0023	0.0642	0.0641	FALSE	FALSE	FALSE	SnNOWr	0.1043	0.9825	outcome	TRUE	reported	textfile	6	150723408	3658	0.04986	5.772e-06	1734	TRUE	reported	cRXotl	0.0642	2	TRUE	6021	0.00560484	20.6068	0.000365055
rs215237	A	G	A	G	-0.126	0.0178	0.2855	0.7414	FALSE	FALSE	FALSE	SnNOWr	0.0603	0.7683	outcome	TRUE	reported	textfile	19	56404703	3658	0.02775	5.794e-06	1734	TRUE	reported	cRXotl	0.2855	2	TRUE	6021	0.00560442	20.6052	0.000683492
rs149234257	A	T	A	T	-0.4659	-0.0898	0.0141	0.0184	FALSE	TRUE	FALSE	SnNOWr	0.224	0.6885	outcome	TRUE	reported	textfile	2	7498941	3658	0.103	6.322e-06	1734	TRUE	reported	cRXotl	0.0141	2	TRUE	6021	0.00556218	20.4491	0.000907977
rs1871013	A	G	A	G	-0.1526	-0.036	0.1594	0.8578	FALSE	FALSE	FALSE	SnNOWr	0.0714	0.6146	outcome	TRUE	reported	textfile	15	27842066	3658	0.03413	7.954e-06	1734	TRUE	reported	cRXotl	0.1594	2	TRUE	6021	0.00543533	19.9802	0.00131325
rs2904880	G	C	G	C	0.1724	0.0135	0.4032	0.3159	FALSE	TRUE	FALSE	gsh8cO	0.053	0.7987	outcome	TRUE	reported	textfile	16	28944396	3657	0.02503	6.574e-12	1735	TRUE	reported	vj6XL6	0.4032	2	TRUE	6021	0.0128065	47.4149	1.4089e-07
rs113612962	C	G	C	G	-0.3441	0.0368	0.0402	0.0526	FALSE	TRUE	FALSE	gsh8cO	0.1209	0.7609	outcome	TRUE	reported	textfile	22	43167446	3657	0.06242	3.771e-08	1735	TRUE	reported	vj6XL6	0.0402	2	TRUE	6021	0.00824143	30.3728	3.25681e-05
rs281142	A	G	A	G	0.2516	0.0687	0.0599	0.1472	FALSE	FALSE	FALSE	gsh8cO	0.0747	0.3574	outcome	TRUE	reported	textfile	5	70969845	3657	0.05157	1.112e-06	1735	TRUE	reported	vj6XL6	0.0599	2	TRUE	6021	0.00646673	23.7897	0.0010436
rs56044553	T	C	T	C	0.1201	0.0515	0.4832	0.4018	FALSE	FALSE	FALSE	gsh8cO	0.0502	0.3046	outcome	TRUE	reported	textfile	5	173972294	3657	0.02471	1.225e-06	1735	TRUE	reported	vj6XL6	0.4832	2	TRUE	6021	0.00641829	23.6104	0.00138029
rs145924813	T	C	T	C	0.3435	0.0134	0.0327	0.0348	FALSE	FALSE	FALSE	gsh8cO	0.1484	0.9279	outcome	TRUE	reported	textfile	1	28617041	3657	0.07069	1.225e-06	1735	TRUE	reported	vj6XL6	0.0327	2	TRUE	6021	0.00641531	23.5993	0.000161396
rs137949497	G	T	G	T	0.4884	0.2324	0.0146	0.0393	FALSE	FALSE	FALSE	gsh8cO	0.1515	0.1251	outcome	TRUE	reported	textfile	21	32136760	3657	0.1009	1.351e-06	1735	TRUE	reported	vj6XL6	0.0146	2	TRUE	6021	0.00636606	23.417	0.00409395
rs9465443	C	T	C	T	-0.2674	-0.0578	0.0483	0.0389	FALSE	FALSE	FALSE	gsh8cO	0.1423	0.6848	outcome	TRUE	reported	textfile	6	19563666	3657	0.05593	1.81e-06	1735	TRUE	reported	vj6XL6	0.0483	2	TRUE	6021	0.00621158	22.8452	0.000436175
rs113812519	G	A	G	A	0.4328	0.2238	0.0185	0.0185	FALSE	FALSE	FALSE	gsh8cO	0.2056	0.2764	outcome	TRUE	reported	textfile	1	207276336	3657	0.09174	2.47e-06	1735	TRUE	reported	vj6XL6	0.0185	2	TRUE	6021	0.00604919	22.2443	0.00230323
rs2971439	G	T	G	T	0.1725	-0.0109	0.1251	0.7953	FALSE	FALSE	FALSE	gsh8cO	0.061	0.8583	outcome	TRUE	reported	textfile	12	118282893	3657	0.03725	3.789e-06	1735	TRUE	reported	vj6XL6	0.1251	2	TRUE	6021	0.0058299	21.4333	0.00040171
rs2281460	A	G	A	G	0.1354	-0.0645	0.2302	0.2384	FALSE	FALSE	FALSE	gsh8cO	0.0596	0.2789	outcome	TRUE	reported	textfile	6	42130300	3657	0.02936	4.137e-06	1735	TRUE	reported	vj6XL6	0.2302	2	TRUE	6021	0.00578205	21.2563	0.00299149
rs73275737	G	C	G	C	-0.4649	-0.2685	0.0135	0.0227	FALSE	TRUE	FALSE	gsh8cO	0.2031	0.1862	outcome	TRUE	reported	textfile	5	148626837	3657	0.101	4.351e-06	1735	TRUE	reported	vj6XL6	0.0135	2	TRUE	6021	0.00576027	21.1757	0.00488723
rs7197237	A	G	A	G	0.1723	-0.0417	0.1256	0.2108	FALSE	FALSE	FALSE	gsh8cO	0.0601	0.4881	outcome	TRUE	reported	textfile	16	49673381	3657	0.0376	4.725e-06	1735	TRUE	reported	vj6XL6	0.1256	2	TRUE	6021	0.00570931	20.9873	0.0014512
rs2512433	G	A	G	A	0.1233	-0.0247	0.3022	0.3289	FALSE	FALSE	FALSE	gsh8cO	0.0522	0.6356	outcome	TRUE	reported	textfile	8	98632764	3657	0.02699	5.049e-06	1735	TRUE	reported	vj6XL6	0.3022	2	TRUE	6021	0.00567445	20.8585	0.000936954
rs6509969	A	G	A	G	0.145	-0.0837	0.181	0.7072	FALSE	FALSE	FALSE	gsh8cO	0.0547	0.1257	outcome	TRUE	reported	textfile	19	56415502	3657	0.032	6.047e-06	1735	TRUE	reported	vj6XL6	0.181	2	TRUE	6021	0.00558315	20.521	0.008537
rs116364947	T	A	T	A	0.4725	0.1528	0.0134	0.0206	FALSE	TRUE	FALSE	gsh8cO	0.2063	0.4589	outcome	TRUE	reported	textfile	6	36809211	3657	0.1047	6.623e-06	1735	TRUE	reported	vj6XL6	0.0134	2	TRUE	6021	0.00553826	20.3551	0.00193005
rs180723221	T	A	T	A	0.3335	0.1864	0.0342	0.045	FALSE	TRUE	FALSE	gsh8cO	0.122	0.1265	outcome	TRUE	reported	textfile	7	103091403	3657	0.0739	6.577e-06	1735	TRUE	reported	vj6XL6	0.0342	2	TRUE	6021	0.00553817	20.3547	0.00887057
rs6575228	A	G	A	G	-0.1117	-0.0213	0.4125	0.4462	FALSE	FALSE	FALSE	gsh8cO	0.0486	0.6621	outcome	TRUE	reported	textfile	14	92561395	3657	0.02479	6.805e-06	1735	TRUE	reported	vj6XL6	0.4125	2	TRUE	6021	0.00552108	20.2916	0.00103405
rs5762000	T	C	T	C	0.1405	-0.0644	0.1854	0.2198	FALSE	FALSE	FALSE	gsh8cO	0.0645	0.3182	outcome	TRUE	reported	textfile	22	27530934	3657	0.0312	6.887e-06	1735	TRUE	reported	vj6XL6	0.1854	2	TRUE	6021	0.00551464	20.2678	0.00333819
rs80268044	A	G	A	G	0.1499	0.0245	0.1765	0.0954	FALSE	FALSE	FALSE	gsh8cO	0.0851	0.7736	outcome	TRUE	reported	textfile	2	43810948	3657	0.03329	6.862e-06	1735	TRUE	reported	vj6XL6	0.1765	2	TRUE	6021	0.00551378	20.2646	0.000748528
rs17706571	T	C	T	C	0.4369	0.2019	0.0164	0.0163	FALSE	FALSE	FALSE	gsh8cO	0.2071	0.3294	outcome	TRUE	reported	textfile	12	29271392	3657	0.09817	8.854e-06	1735	TRUE	reported	vj6XL6	0.0164	2	TRUE	6021	0.00538686	19.7956	0.00364067
rs6500310	T	C	T	C	-0.1321	-0.0266	0.2104	0.3211	FALSE	FALSE	FALSE	gsh8cO	0.0538	0.6213	outcome	TRUE	reported	textfile	16	50422996	3657	0.02984	9.796e-06	1735	TRUE	reported	vj6XL6	0.2104	2	TRUE	6021	0.00533043	19.5871	0.00144993
rs74705306	A	G	A	G	-0.1965	-0.0484	0.0812	0.1183	FALSE	FALSE	FALSE	gsh8cO	0.0782	0.5363	outcome	TRUE	reported	textfile	4	189782918	3657	0.0444	9.871e-06	1735	TRUE	reported	vj6XL6	0.0812	2	TRUE	6021	0.00532739	19.5759	0.00188991
rs11643297	G	A	G	A	0.1475	-0.0352	0.389	0.6984	FALSE	FALSE	FALSE	pBM6xj	0.0533	0.5093	outcome	TRUE	reported	textfile	16	28973268	3657	0.02551	7.888e-09	1736	TRUE	reported	BpW9EE	0.389	2	TRUE	6021	0.00905912	33.4138	3.36186e-05
rs113812519	G	A	G	A	0.4995	0.2238	0.0185	0.0185	FALSE	FALSE	FALSE	pBM6xj	0.2056	0.2764	outcome	TRUE	reported	textfile	1	207276336	3657	0.09201	6.038e-08	1736	TRUE	reported	BpW9EE	0.0185	2	TRUE	6021	0.00799448	29.4553	0.000309858
rs4649079	T	C	T	C	0.2137	-0.0746	0.0961	0.062	FALSE	FALSE	FALSE	pBM6xj	0.1249	0.5502	outcome	TRUE	reported	textfile	1	25535823	3657	0.04252	5.236e-07	1736	TRUE	reported	BpW9EE	0.0961	2	TRUE	6021	0.00685975	25.2456	0.000327847
rs113612962	C	G	C	G	-0.313	0.0368	0.0402	0.0526	FALSE	TRUE	FALSE	pBM6xj	0.1209	0.7609	outcome	TRUE	reported	textfile	22	43167446	3657	0.0628	6.533e-07	1736	TRUE	reported	BpW9EE	0.0402	2	TRUE	6021	0.0067469	24.8274	0.000184461
rs5762000	T	C	T	C	0.1549	-0.0644	0.1854	0.2198	FALSE	FALSE	FALSE	pBM6xj	0.0645	0.3182	outcome	TRUE	reported	textfile	22	27530934	3657	0.03135	8.076e-07	1736	TRUE	reported	BpW9EE	0.1854	2	TRUE	6021	0.00663152	24.4	0.00104184
rs576166	G	T	G	T	-0.1736	-0.0439	0.1421	0.2306	FALSE	FALSE	FALSE	pBM6xj	0.0604	0.467	outcome	TRUE	reported	textfile	6	33567104	3657	0.03616	1.646e-06	1736	TRUE	reported	BpW9EE	0.1421	2	TRUE	6021	0.0062631	23.0359	0.000850649
rs9350187	T	C	T	C	-0.2424	0.0132	0.0607	0.0763	FALSE	FALSE	FALSE	pBM6xj	0.0934	0.8879	outcome	TRUE	reported	textfile	6	19794487	3657	0.05126	2.344e-06	1736	TRUE	reported	BpW9EE	0.0607	2	TRUE	6021	0.00607765	22.3496	0.000273751
rs2903728	C	T	C	T	-0.1824	0.07	0.1147	0.2171	FALSE	FALSE	FALSE	pBM6xj	0.0598	0.2417	outcome	TRUE	reported	textfile	19	56408295	3657	0.03887	2.799e-06	1736	TRUE	reported	BpW9EE	0.1147	2	TRUE	6021	0.00598533	22.0081	0.00290239
rs72988602	G	A	G	A	0.171	0.0448	0.1348	0.0728	FALSE	FALSE	FALSE	pBM6xj	0.0982	0.6481	outcome	TRUE	reported	textfile	19	7114038	3657	0.0369	3.716e-06	1736	TRUE	reported	BpW9EE	0.1348	2	TRUE	6021	0.0058381	21.4636	0.000749043
rs73393708	G	T	G	T	0.1615	0.0454	0.1512	0.1664	FALSE	FALSE	FALSE	pBM6xj	0.0662	0.4929	outcome	TRUE	reported	textfile	7	90292336	3657	0.03492	3.877e-06	1736	TRUE	reported	BpW9EE	0.1512	2	TRUE	6021	0.00581486	21.3776	0.00127049
rs12554596	G	A	G	A	-0.1176	0.0314	0.3891	0.2119	FALSE	FALSE	FALSE	pBM6xj	0.0632	0.6186	outcome	TRUE	reported	textfile	9	37002142	3657	0.02551	4.164e-06	1736	TRUE	reported	BpW9EE	0.3891	2	TRUE	6021	0.00577766	21.2401	0.000877927
rs7900621	G	A	G	A	0.1121	0.0036	0.4959	0.5266	FALSE	FALSE	FALSE	pBM6xj	0.0508	0.9433	outcome	TRUE	reported	textfile	10	125702232	3657	0.02468	5.742e-06	1736	TRUE	reported	BpW9EE	0.4959	2	TRUE	6021	0.00560987	20.6197	0.000407093
rs767666	G	A	G	A	-0.1542	0.0563	0.1559	0.8162	FALSE	FALSE	FALSE	pBM6xj	0.0635	0.3757	outcome	TRUE	reported	textfile	7	43485898	3657	0.0342	6.741e-06	1736	TRUE	reported	BpW9EE	0.1559	2	TRUE	6021	0.0055282	20.3179	0.00263099
rs17706571	T	C	T	C	0.4437	0.2019	0.0164	0.0163	FALSE	FALSE	FALSE	pBM6xj	0.2071	0.3294	outcome	TRUE	reported	textfile	12	29271392	3657	0.09858	6.955e-06	1736	TRUE	reported	BpW9EE	0.0164	2	TRUE	6021	0.00550905	20.2471	0.00320435
rs10917581	G	A	G	A	0.1276	-0.062	0.2532	0.2433	FALSE	FALSE	FALSE	pBM6xj	0.058	0.2849	outcome	TRUE	reported	textfile	1	162624504	3657	0.02854	8.077e-06	1736	TRUE	reported	BpW9EE	0.2532	2	TRUE	6021	0.00543627	19.9782	0.0041567
rs7718237	A	G	A	G	0.111	0.0521	0.4837	0.4003	FALSE	FALSE	FALSE	pBM6xj	0.0501	0.2991	outcome	TRUE	reported	textfile	5	173972852	3657	0.02483	8.104e-06	1736	TRUE	reported	BpW9EE	0.4837	2	TRUE	6021	0.00543501	19.9735	0.00393333
rs10162314	A	G	A	G	0.4901	0.1697	0.0127	0.0247	FALSE	FALSE	FALSE	pBM6xj	0.1765	0.3364	outcome	TRUE	reported	textfile	14	70990398	3657	0.1099	8.525e-06	1736	TRUE	reported	BpW9EE	0.0127	2	TRUE	6021	0.00540871	19.8763	0.00346562
rs78007482	A	T	A	T	-0.2027	0.144	0.082	0.0727	FALSE	TRUE	FALSE	pBM6xj	0.0961	0.1339	outcome	TRUE	reported	textfile	8	133189482	3657	0.04554	8.826e-06	1736	TRUE	reported	BpW9EE	0.082	2	TRUE	6021	0.00538828	19.8009	0.00969673
rs80268044	A	G	A	G	0.1485	0.0245	0.1765	0.0954	FALSE	FALSE	FALSE	pBM6xj	0.0851	0.7736	outcome	TRUE	reported	textfile	2	43810948	3657	0.03337	8.825e-06	1736	TRUE	reported	BpW9EE	0.1765	2	TRUE	6021	0.00538605	19.7926	0.000869492
rs766977	A	G	A	G	-0.4502	-0.0608	0.015	0.0872	FALSE	FALSE	FALSE	pBM6xj	0.0897	0.4979	outcome	TRUE	reported	textfile	12	50290056	3657	0.1014	9.325e-06	1736	TRUE	reported	BpW9EE	0.015	2	TRUE	6021	0.00536137	19.7014	0.00205643
rs113812519	G	A	G	A	0.4972	0.2238	0.0185	0.0185	FALSE	FALSE	FALSE	y8KHFU	0.2056	0.2764	outcome	TRUE	reported	textfile	1	207276336	3653	0.09126	5.41e-08	1737	TRUE	reported	LQ89ZG	0.0185	2	TRUE	6021	0.00806004	29.6663	0.000290898
rs12216684	A	G	A	G	0.2683	-0.1754	0.0543	0.0717	FALSE	FALSE	FALSE	y8KHFU	0.0986	0.07542	outcome	TRUE	reported	textfile	7	56291533	3653	0.05345	5.394e-07	1737	TRUE	reported	LQ89ZG	0.0543	2	TRUE	6021	0.00685032	25.183	0.00420445
rs593715	A	G	A	G	0.1409	-0.1189	0.2224	0.2559	FALSE	FALSE	FALSE	y8KHFU	0.0588	0.04312	outcome	TRUE	reported	textfile	19	50734394	3653	0.02934	1.617e-06	1737	TRUE	reported	LQ89ZG	0.2224	2	TRUE	6021	0.00627363	23.0496	0.0110173
rs67316035	A	T	A	T	-0.1929	-0.0774	0.1038	0.2117	FALSE	TRUE	FALSE	y8KHFU	0.0603	0.199	outcome	TRUE	reported	textfile	11	132221605	3653	0.04028	1.75e-06	1737	TRUE	reported	LQ89ZG	0.1038	2	TRUE	6021	0.00623904	22.9217	0.00283306
rs78895027	C	T	C	T	0.1806	0.1588	0.1163	0.0764	FALSE	FALSE	FALSE	y8KHFU	0.1016	0.1179	outcome	TRUE	reported	textfile	6	112306917	3653	0.03797	2.052e-06	1737	TRUE	reported	LQ89ZG	0.1163	2	TRUE	6021	0.00615493	22.6108	0.005303
rs1449311	A	G	A	G	0.1261	0.0672	0.3073	0.2889	FALSE	FALSE	FALSE	y8KHFU	0.055	0.2222	outcome	TRUE	reported	textfile	3	100703124	3653	0.027	3.103e-06	1737	TRUE	reported	LQ89ZG	0.3073	2	TRUE	6021	0.00593564	21.8004	0.00339008
rs2903728	C	T	C	T	-0.1792	0.07	0.1148	0.2171	FALSE	FALSE	FALSE	y8KHFU	0.0598	0.2417	outcome	TRUE	reported	textfile	19	56408295	3653	0.03861	3.58e-06	1737	TRUE	reported	LQ89ZG	0.1148	2	TRUE	6021	0.00586237	21.5297	0.00329736
rs148381451	T	C	T	C	-0.2588	-0.0573	0.0497	0.0313	FALSE	FALSE	FALSE	y8KHFU	0.1684	0.7337	outcome	TRUE	reported	textfile	17	63085557	3653	0.05589	3.766e-06	1737	TRUE	reported	LQ89ZG	0.0497	2	TRUE	6021	0.00583538	21.43	0.000581276
rs34165814	C	T	C	T	0.2572	-0.1047	0.0791	0.0607	FALSE	FALSE	FALSE	y8KHFU	0.1295	0.419	outcome	TRUE	reported	textfile	2	89486664	3653	0.05558	3.823e-06	1737	TRUE	reported	LQ89ZG	0.0791	2	TRUE	6021	0.00582796	21.4026	0.00163154
rs62524107	C	T	C	T	-0.2466	-0.0961	0.0527	0.0579	FALSE	FALSE	FALSE	y8KHFU	0.113	0.3947	outcome	TRUE	reported	textfile	8	141805137	3653	0.05336	3.952e-06	1737	TRUE	reported	LQ89ZG	0.0527	2	TRUE	6021	0.00581264	21.346	0.00181085
rs754067	C	T	C	T	-0.1784	0.0594	0.1142	0.2004	FALSE	FALSE	FALSE	y8KHFU	0.0638	0.3519	outcome	TRUE	reported	textfile	16	17323672	3653	0.0387	4.176e-06	1737	TRUE	reported	LQ89ZG	0.1142	2	TRUE	6021	0.00578361	21.2388	0.00220623
rs79699942	G	A	G	A	0.1835	-0.0002	0.1109	0.1319	FALSE	FALSE	FALSE	y8KHFU	0.0725	0.9974	outcome	TRUE	reported	textfile	12	44929593	3653	0.03985	4.283e-06	1737	TRUE	reported	LQ89ZG	0.1109	2	TRUE	6021	0.00577102	21.1923	0.000286399
rs2904880	G	C	G	C	0.1148	0.0135	0.4031	0.3159	FALSE	TRUE	FALSE	y8KHFU	0.053	0.7987	outcome	TRUE	reported	textfile	16	28944396	3653	0.02502	4.642e-06	1737	TRUE	reported	LQ89ZG	0.4031	2	TRUE	6021	0.00573012	21.0412	0.000541035
rs74455073	C	T	C	T	-0.1998	0.0652	0.0921	0.0439	FALSE	FALSE	FALSE	y8KHFU	0.1282	0.6112	outcome	TRUE	reported	textfile	12	54902972	3653	0.04387	5.404e-06	1737	TRUE	reported	LQ89ZG	0.0921	2	TRUE	6021	0.00564608	20.7309	0.00104958
rs34798965	A	C	A	C	-0.2039	-0.0639	0.0788	0.1076	FALSE	FALSE	FALSE	y8KHFU	0.081	0.4299	outcome	TRUE	reported	textfile	10	71647692	3653	0.04479	5.476e-06	1737	TRUE	reported	LQ89ZG	0.0788	2	TRUE	6021	0.00564113	20.7126	0.00191509
rs10875904	C	A	C	A	0.1128	-0.0546	0.4472	0.572	FALSE	FALSE	FALSE	y8KHFU	0.049	0.265	outcome	TRUE	reported	textfile	12	49357889	3653	0.02491	6.154e-06	1737	TRUE	reported	LQ89ZG	0.4472	2	TRUE	6021	0.005582	20.4943	0.00392325
rs11855577	G	C	G	C	0.1154	0.0347	0.3572	0.4128	FALSE	TRUE	FALSE	y8KHFU	0.0499	0.4872	outcome	TRUE	reported	textfile	15	65507482	3653	0.02592	8.751e-06	1737	TRUE	reported	LQ89ZG	0.3572	2	TRUE	6021	0.00539687	19.8109	0.00205812
rs12100549	T	C	T	C	0.2694	0.0948	0.0402	0.042	FALSE	FALSE	FALSE	y8KHFU	0.1243	0.4457	outcome	TRUE	reported	textfile	14	103417030	3653	0.06071	9.332e-06	1737	TRUE	reported	LQ89ZG	0.0402	2	TRUE	6021	0.00536155	19.6805	0.00245496
rs11733521	T	C	T	C	-0.222	0.1426	0.0643	0.0301	FALSE	FALSE	FALSE	y8KHFU	0.1573	0.3646	outcome	TRUE	reported	textfile	4	68968349	3653	0.05005	9.486e-06	1737	TRUE	reported	LQ89ZG	0.0643	2	TRUE	6021	0.00535692	19.6635	0.00329345
rs9469775	T	C	T	C	-0.1264	-0.0338	0.2658	0.2153	FALSE	FALSE	FALSE	y8KHFU	0.06	0.5725	outcome	TRUE	reported	textfile	6	34335091	3653	0.02851	9.496e-06	1737	TRUE	reported	LQ89ZG	0.2658	2	TRUE	6021	0.00535204	19.6454	0.00164285
rs147319341	A	G	A	G	0.3826	0.102	0.02	0.0322	FALSE	FALSE	FALSE	y8KHFU	0.1637	0.5334	outcome	TRUE	reported	textfile	8	11301733	3653	0.08634	9.627e-06	1737	TRUE	reported	LQ89ZG	0.02	2	TRUE	6021	0.00534673	19.6258	0.00187255
rs113812519	G	A	G	A	0.5404	0.2238	0.0185	0.0185	FALSE	FALSE	FALSE	PjgD72	0.2056	0.2764	outcome	TRUE	reported	textfile	1	207276336	3656	0.0918	4.291e-09	1738	TRUE	reported	VZhNOT	0.0185	2	TRUE	6021	0.00938949	34.6344	7.28372e-05
rs144743804	A	G	A	G	0.4919	0.5584	0.0197	0.0181	FALSE	FALSE	FALSE	PjgD72	0.2625	0.03343	outcome	TRUE	reported	textfile	1	207018206	3656	0.08935	3.947e-08	1738	TRUE	reported	VZhNOT	0.0197	2	TRUE	6021	0.00822191	30.2919	0.00245255
rs11643297	G	A	G	A	0.1375	-0.0352	0.3891	0.6984	FALSE	FALSE	FALSE	PjgD72	0.0533	0.5093	outcome	TRUE	reported	textfile	16	28973268	3656	0.02549	7.319e-08	1738	TRUE	reported	VZhNOT	0.3891	2	TRUE	6021	0.00789617	29.0823	0.000121453
rs764603	C	A	C	A	0.5656	0.0315	0.0131	0.0166	FALSE	FALSE	FALSE	PjgD72	0.2224	0.8875	outcome	TRUE	reported	textfile	6	36793516	3656	0.1075	1.5e-07	1738	TRUE	reported	VZhNOT	0.0131	2	TRUE	6021	0.00751484	27.6671	4.95836e-05
rs80268044	A	G	A	G	0.1663	0.0245	0.1766	0.0954	FALSE	FALSE	FALSE	PjgD72	0.0851	0.7736	outcome	TRUE	reported	textfile	2	43810948	3656	0.03328	6.11e-07	1738	TRUE	reported	VZhNOT	0.1766	2	TRUE	6021	0.00678353	24.9563	0.000169979
rs113612962	C	G	C	G	-0.3091	0.0368	0.0402	0.0526	FALSE	TRUE	FALSE	PjgD72	0.1209	0.7609	outcome	TRUE	reported	textfile	22	43167446	3656	0.06276	8.799e-07	1738	TRUE	reported	VZhNOT	0.0402	2	TRUE	6021	0.00659104	24.2435	0.000221393
rs72988602	G	A	G	A	0.1801	0.0448	0.1347	0.0728	FALSE	FALSE	FALSE	PjgD72	0.0982	0.6481	outcome	TRUE	reported	textfile	19	7114038	3656	0.03685	1.063e-06	1738	TRUE	reported	VZhNOT	0.1347	2	TRUE	6021	0.0064911	23.8734	0.000356574
rs4649079	T	C	T	C	0.2038	-0.0746	0.0961	0.062	FALSE	FALSE	FALSE	PjgD72	0.1249	0.5502	outcome	TRUE	reported	textfile	1	25535823	3656	0.04247	1.653e-06	1738	TRUE	reported	VZhNOT	0.0961	2	TRUE	6021	0.00625908	23.0147	0.000640465
rs12554596	G	A	G	A	-0.1201	0.0314	0.3892	0.2119	FALSE	FALSE	FALSE	PjgD72	0.0632	0.6186	outcome	TRUE	reported	textfile	9	37002142	3656	0.02547	2.499e-06	1738	TRUE	reported	VZhNOT	0.3892	2	TRUE	6021	0.00604489	22.2224	0.000649451
rs149041258	G	A	G	A	-0.2229	0.1301	0.0759	0.0789	FALSE	FALSE	FALSE	PjgD72	0.0973	0.1813	outcome	TRUE	reported	textfile	18	74408048	3656	0.04815	3.806e-06	1738	TRUE	reported	VZhNOT	0.0759	2	TRUE	6021	0.00582751	21.4185	0.0047126
rs149168550	G	C	G	C	0.2262	0.034	0.0673	0.0223	FALSE	TRUE	FALSE	PjgD72	0.2339	0.8846	outcome	TRUE	reported	textfile	12	111354000	3656	0.04939	4.806e-06	1738	TRUE	reported	VZhNOT	0.0673	2	TRUE	6021	0.00570448	20.9638	0.000432315
rs9814135	C	T	C	T	-0.176	-0.0707	0.1161	0.7885	FALSE	FALSE	FALSE	PjgD72	0.0698	0.3109	outcome	TRUE	reported	textfile	3	194094110	3656	0.03853	5.092e-06	1738	TRUE	reported	VZhNOT	0.1161	2	TRUE	6021	0.00567479	20.854	0.00291116
rs77697711	A	C	A	C	0.2073	-0.0227	0.081	0.0855	FALSE	FALSE	FALSE	PjgD72	0.0968	0.8146	outcome	TRUE	reported	textfile	22	45116977	3656	0.04559	5.621e-06	1738	TRUE	reported	VZhNOT	0.081	2	TRUE	6021	0.00562347	20.6644	0.000584019
rs148381451	T	C	T	C	-0.2551	-0.0573	0.0496	0.0313	FALSE	FALSE	FALSE	PjgD72	0.1684	0.7337	outcome	TRUE	reported	textfile	17	63085557	3656	0.05618	5.774e-06	1738	TRUE	reported	VZhNOT	0.0496	2	TRUE	6021	0.00560801	20.6072	0.000754436
rs4942349	G	A	G	A	-0.1195	0.0906	0.3333	0.3198	FALSE	FALSE	FALSE	PjgD72	0.0579	0.1178	outcome	TRUE	reported	textfile	13	31564105	3656	0.02636	6.021e-06	1738	TRUE	reported	VZhNOT	0.3333	2	TRUE	6021	0.0055899	20.5403	0.00903463
rs41272381	G	C	G	C	-0.2041	0.14	0.0819	0.0725	FALSE	TRUE	FALSE	PjgD72	0.0961	0.1452	outcome	TRUE	reported	textfile	8	133192184	3656	0.04549	7.458e-06	1738	TRUE	reported	VZhNOT	0.0819	2	TRUE	6021	0.005476	20.1195	0.00828204
rs6575228	A	G	A	G	-0.1114	-0.0213	0.4126	0.4462	FALSE	FALSE	FALSE	PjgD72	0.0486	0.6621	outcome	TRUE	reported	textfile	14	92561395	3656	0.02486	7.636e-06	1738	TRUE	reported	VZhNOT	0.4126	2	TRUE	6021	0.0054624	20.0692	0.00110696
rs7718237	A	G	A	G	0.111	0.0521	0.4837	0.4003	FALSE	FALSE	FALSE	PjgD72	0.0501	0.2991	outcome	TRUE	reported	textfile	5	173972852	3656	0.0248	7.878e-06	1738	TRUE	reported	VZhNOT	0.4837	2	TRUE	6021	0.00544958	20.0219	0.00387763
rs4862454	A	G	A	G	-0.1216	-0.0289	0.2981	0.3714	FALSE	FALSE	FALSE	PjgD72	0.0652	0.6573	outcome	TRUE	reported	textfile	4	185816062	3656	0.02732	8.848e-06	1738	TRUE	reported	VZhNOT	0.2981	2	TRUE	6021	0.00538955	19.8001	0.00121617
rs76223390	C	T	C	T	-0.1366	-0.0776	0.2157	0.1636	FALSE	FALSE	FALSE	PjgD72	0.0724	0.2841	outcome	TRUE	reported	textfile	11	133434534	3656	0.03072	9.006e-06	1738	TRUE	reported	VZhNOT	0.2157	2	TRUE	6021	0.00537911	19.7616	0.00443581
rs117491079	T	C	T	C	0.343	0.1923	0.0391	0.0192	FALSE	FALSE	FALSE	w2veSI	0.2378	0.4187	outcome	TRUE	reported	textfile	16	85272300	3657	0.06329	6.356e-08	1739	TRUE	reported	FpFRrd	0.0391	2	TRUE	6021	0.00796744	29.3549	0.000162185
rs78258643	T	A	T	A	0.2575	-0.0192	0.0663	0.0457	FALSE	TRUE	FALSE	w2veSI	0.1254	0.8782	outcome	TRUE	reported	textfile	18	40527078	3657	0.04925	1.8e-07	1739	TRUE	reported	FpFRrd	0.0663	2	TRUE	6021	0.00741964	27.3215	5.71196e-05
rs11701275	G	T	G	T	0.2655	0.2437	0.0634	0.0248	FALSE	FALSE	FALSE	w2veSI	0.1875	0.1939	outcome	TRUE	reported	textfile	21	16962765	3657	0.05094	1.963e-07	1739	TRUE	reported	FpFRrd	0.0634	2	TRUE	6021	0.00737347	27.1502	0.000943564
rs76670160	T	C	T	C	-0.5443	0.4102	0.0127	0.0178	FALSE	FALSE	FALSE	w2veSI	0.2238	0.06682	outcome	TRUE	reported	textfile	3	54686737	3657	0.1137	1.758e-06	1739	TRUE	reported	FpFRrd	0.0127	2	TRUE	6021	0.00622756	22.9044	0.00816213
rs11585051	A	G	A	G	0.116	0.0585	0.4234	0.5011	FALSE	FALSE	FALSE	w2veSI	0.0494	0.2362	outcome	TRUE	reported	textfile	1	235762345	3657	0.02451	2.309e-06	1739	TRUE	reported	FpFRrd	0.4234	2	TRUE	6021	0.00608769	22.3868	0.00268992
rs181547338	A	G	A	G	0.3338	-0.2043	0.0314	0.0241	FALSE	FALSE	FALSE	w2veSI	0.1997	0.3064	outcome	TRUE	reported	textfile	2	240579362	3657	0.07095	2.631e-06	1739	TRUE	reported	FpFRrd	0.0314	2	TRUE	6021	0.0060162	22.1223	0.00208314
rs740380	T	G	T	G	0.2342	-0.0115	0.0639	0.0484	FALSE	FALSE	FALSE	w2veSI	0.1254	0.9271	outcome	TRUE	reported	textfile	17	14221680	3657	0.04991	2.796e-06	1739	TRUE	reported	FpFRrd	0.0639	2	TRUE	6021	0.00598503	22.007	0.000271754
rs72759977	G	A	G	A	0.1601	-0.0773	0.1492	0.1204	FALSE	FALSE	FALSE	w2veSI	0.0788	0.3261	outcome	TRUE	reported	textfile	5	53665443	3657	0.03427	3.095e-06	1739	TRUE	reported	FpFRrd	0.1492	2	TRUE	6021	0.0059326	21.8131	0.00208379
rs6767669	A	G	A	G	-0.1634	0.0333	0.1396	0.2619	FALSE	FALSE	FALSE	w2veSI	0.0575	0.5631	outcome	TRUE	reported	textfile	3	116599500	3657	0.0351	3.34e-06	1739	TRUE	reported	FpFRrd	0.1396	2	TRUE	6021	0.00589113	21.6597	0.000926193
rs2612375	A	T	A	T	0.1328	0.0116	0.2379	0.1987	FALSE	TRUE	FALSE	w2veSI	0.0624	0.8527	outcome	TRUE	reported	textfile	18	73626676	3657	0.02886	4.373e-06	1739	TRUE	reported	FpFRrd	0.2379	2	TRUE	6021	0.00575667	21.1624	0.000445673
rs138520806	A	G	A	G	0.2684	-0.1225	0.047	0.0266	FALSE	FALSE	FALSE	w2veSI	0.1648	0.4574	outcome	TRUE	reported	textfile	5	3781931	3657	0.05834	4.346e-06	1739	TRUE	reported	FpFRrd	0.047	2	TRUE	6021	0.00575441	21.1541	0.00153413
rs72839309	G	C	G	C	-0.1972	0.0421	0.0893	0.0828	FALSE	TRUE	FALSE	w2veSI	0.0912	0.6444	outcome	TRUE	reported	textfile	17	66341775	3657	0.04302	4.722e-06	1739	TRUE	reported	FpFRrd	0.0893	2	TRUE	6021	0.00571294	21.0008	0.000874277
rs9961803	G	A	G	A	-0.1277	-0.066	0.2602	0.7135	FALSE	FALSE	FALSE	w2veSI	0.0537	0.2194	outcome	TRUE	reported	textfile	18	61174560	3657	0.02787	4.748e-06	1739	TRUE	reported	FpFRrd	0.2602	2	TRUE	6021	0.00570817	20.9831	0.00430372
rs6848130	C	T	C	T	-0.1389	0.0335	0.2021	0.2853	FALSE	FALSE	FALSE	w2veSI	0.0558	0.548	outcome	TRUE	reported	textfile	4	81157098	3657	0.03076	6.526e-06	1739	TRUE	reported	FpFRrd	0.2021	2	TRUE	6021	0.00554488	20.3795	0.00142691
rs56799059	A	G	A	G	-0.1513	-0.0102	0.1578	0.0908	FALSE	FALSE	FALSE	w2veSI	0.0924	0.9122	outcome	TRUE	reported	textfile	10	130289313	3657	0.03359	6.863e-06	1739	TRUE	reported	FpFRrd	0.1578	2	TRUE	6021	0.00551734	20.2778	0.000498793
rs115017263	T	G	T	G	-0.2039	0.2983	0.0805	0.03	FALSE	FALSE	FALSE	w2veSI	0.1754	0.08906	outcome	TRUE	reported	textfile	4	55691063	3657	0.04529	6.973e-06	1739	TRUE	reported	FpFRrd	0.0805	2	TRUE	6021	0.00551194	20.2578	0.0123371
rs78175608	A	C	A	C	0.2096	0.0352	0.0749	0.16	FALSE	FALSE	FALSE	w2veSI	0.0685	0.6077	outcome	TRUE	reported	textfile	2	233868788	3657	0.04664	7.23e-06	1739	TRUE	reported	FpFRrd	0.0749	2	TRUE	6021	0.00549223	20.185	0.00125835
rs9913983	T	C	T	C	-0.2985	-0.019	0.0334	0.1	FALSE	FALSE	FALSE	w2veSI	0.0838	0.821	outcome	TRUE	reported	textfile	17	56001319	3657	0.06674	7.951e-06	1739	TRUE	reported	FpFRrd	0.0334	2	TRUE	6021	0.00544029	19.993	0.000711939
rs7171754	A	T	A	T	0.5431	0.2198	0.0101	0.0186	FALSE	TRUE	FALSE	w2veSI	0.2246	0.3276	outcome	TRUE	reported	textfile	15	96281487	3657	0.1219	8.66e-06	1739	TRUE	reported	FpFRrd	0.0101	2	TRUE	6021	0.00539854	19.8388	0.00362305
rs10858826	A	G	A	G	-0.1207	0.0695	0.2889	0.2837	FALSE	FALSE	FALSE	w2veSI	0.0553	0.2087	outcome	TRUE	reported	textfile	12	89505448	3657	0.02723	9.649e-06	1739	TRUE	reported	FpFRrd	0.2889	2	TRUE	6021	0.00534401	19.6373	0.00651893
rs7189927	C	T	C	T	0.167	-0.0357	0.4018	0.654	FALSE	FALSE	FALSE	LEo1UN	0.0515	0.4883	outcome	TRUE	reported	textfile	16	28913787	3657	0.02504	2.979e-11	1740	TRUE	reported	PDZ70W	0.4018	2	TRUE	6021	0.0120168	44.4556	1.41122e-06
rs113612962	C	G	C	G	-0.3426	0.0368	0.0402	0.0526	FALSE	TRUE	FALSE	LEo1UN	0.1209	0.7609	outcome	TRUE	reported	textfile	22	43167446	3657	0.06276	5.128e-08	1740	TRUE	reported	PDZ70W	0.0402	2	TRUE	6021	0.00808275	29.7832	3.9141e-05
rs116364947	T	A	T	A	0.5306	0.1528	0.0134	0.0206	FALSE	TRUE	FALSE	LEo1UN	0.2063	0.4589	outcome	TRUE	reported	textfile	6	36809211	3657	0.1052	4.799e-07	1740	TRUE	reported	PDZ70W	0.0134	2	TRUE	6021	0.00690824	25.4253	0.000434565
rs137949497	G	T	G	T	0.5022	0.2324	0.0146	0.0393	FALSE	FALSE	FALSE	LEo1UN	0.1515	0.1251	outcome	TRUE	reported	textfile	21	32136760	3657	0.1014	7.713e-07	1740	TRUE	reported	PDZ70W	0.0146	2	TRUE	6021	0.00666269	24.5155	0.00308585
rs9368123	A	G	A	G	-0.2466	0.0376	0.0645	0.1256	FALSE	FALSE	FALSE	LEo1UN	0.0732	0.6075	outcome	TRUE	reported	textfile	6	19798682	3657	0.05001	8.57e-07	1740	TRUE	reported	PDZ70W	0.0645	2	TRUE	6021	0.00660495	24.3016	0.000358251
rs56044553	T	C	T	C	0.1202	0.0515	0.4832	0.4018	FALSE	FALSE	FALSE	LEo1UN	0.0502	0.3046	outcome	TRUE	reported	textfile	5	173972294	3657	0.02484	1.369e-06	1740	TRUE	reported	PDZ70W	0.4832	2	TRUE	6021	0.00636222	23.4028	0.00146308
rs2357754	T	C	T	C	-0.1211	0.0205	0.4066	0.5539	FALSE	FALSE	FALSE	LEo1UN	0.05	0.6811	outcome	TRUE	reported	textfile	6	120164685	3657	0.02555	2.228e-06	1740	TRUE	reported	PDZ70W	0.4066	2	TRUE	6021	0.00610551	22.4527	0.000496957
rs62124467	T	C	T	C	0.1384	-0.0293	0.2401	0.2467	FALSE	FALSE	FALSE	LEo1UN	0.0637	0.6458	outcome	TRUE	reported	textfile	19	7079452	3657	0.02927	2.364e-06	1740	TRUE	reported	PDZ70W	0.2401	2	TRUE	6021	0.00607652	22.3455	0.000575792
rs9460382	G	A	G	A	-0.2536	-0.063	0.0509	0.0895	FALSE	FALSE	FALSE	LEo1UN	0.0889	0.4788	outcome	TRUE	reported	textfile	6	19564461	3657	0.05433	3.158e-06	1740	TRUE	reported	PDZ70W	0.0509	2	TRUE	6021	0.00592263	21.7762	0.00118586
rs113812519	G	A	G	A	0.4305	0.2238	0.0185	0.0185	FALSE	FALSE	FALSE	LEo1UN	0.2056	0.2764	outcome	TRUE	reported	textfile	1	207276336	3657	0.09223	3.156e-06	1740	TRUE	reported	PDZ70W	0.0185	2	TRUE	6021	0.00592239	21.7753	0.00262331
rs2281460	A	G	A	G	0.1375	-0.0645	0.2302	0.2384	FALSE	FALSE	FALSE	LEo1UN	0.0596	0.2789	outcome	TRUE	reported	textfile	6	42130300	3657	0.02951	3.298e-06	1740	TRUE	reported	PDZ70W	0.2302	2	TRUE	6021	0.00590162	21.6985	0.00264589
rs13382005	G	A	G	A	0.1843	0.108	0.1065	0.0613	FALSE	FALSE	FALSE	LEo1UN	0.1011	0.2856	outcome	TRUE	reported	textfile	18	58304032	3657	0.03966	3.511e-06	1740	TRUE	reported	PDZ70W	0.1065	2	TRUE	6021	0.00587034	21.5828	0.00265634
rs145924813	T	C	T	C	0.3277	0.0134	0.0327	0.0348	FALSE	FALSE	FALSE	LEo1UN	0.1484	0.9279	outcome	TRUE	reported	textfile	1	28617041	3657	0.07109	4.154e-06	1740	TRUE	reported	PDZ70W	0.0327	2	TRUE	6021	0.0057769	21.2372	0.000348101
rs77162145	C	T	C	T	0.3247	0.0175	0.0302	0.0462	FALSE	FALSE	FALSE	LEo1UN	0.1238	0.8874	outcome	TRUE	reported	textfile	16	48885048	3657	0.07074	4.568e-06	1740	TRUE	reported	PDZ70W	0.0302	2	TRUE	6021	0.00572815	21.057	0.000415879
rs4343243	A	G	A	G	0.1192	-0.0183	0.3644	0.4328	FALSE	FALSE	FALSE	LEo1UN	0.0497	0.7124	outcome	TRUE	reported	textfile	15	77004600	3657	0.02606	4.948e-06	1740	TRUE	reported	PDZ70W	0.3644	2	TRUE	6021	0.00568854	20.9106	0.000730678
rs5762000	T	C	T	C	0.1428	-0.0644	0.1854	0.2198	FALSE	FALSE	FALSE	LEo1UN	0.0645	0.3182	outcome	TRUE	reported	textfile	22	27530934	3657	0.03136	5.47e-06	1740	TRUE	reported	PDZ70W	0.1854	2	TRUE	6021	0.00563798	20.7237	0.002936
rs12554848	C	T	C	T	-0.1137	0.063	0.4634	0.2802	FALSE	FALSE	FALSE	LEo1UN	0.0548	0.2501	outcome	TRUE	reported	textfile	9	36981822	3657	0.02506	5.866e-06	1740	TRUE	reported	PDZ70W	0.4634	2	TRUE	6021	0.00559752	20.5741	0.00412416
rs17242358	A	G	A	G	0.1452	-0.0419	0.181	0.1917	FALSE	FALSE	FALSE	LEo1UN	0.063	0.5061	outcome	TRUE	reported	textfile	8	129964873	3657	0.03205	6.115e-06	1740	TRUE	reported	PDZ70W	0.181	2	TRUE	6021	0.00558112	20.5135	0.00157212
rs78614237	C	G	C	G	0.2298	0.0424	0.0618	0.0171	FALSE	TRUE	FALSE	LEo1UN	0.2127	0.8422	outcome	TRUE	reported	textfile	20	47459855	3657	0.05104	6.957e-06	1740	TRUE	reported	PDZ70W	0.0618	2	TRUE	6021	0.00551256	20.2601	0.000614373
rs281142	A	G	A	G	0.2326	0.0687	0.0599	0.1472	FALSE	FALSE	FALSE	LEo1UN	0.0747	0.3574	outcome	TRUE	reported	textfile	5	70969845	3657	0.05187	7.547e-06	1740	TRUE	reported	PDZ70W	0.0599	2	TRUE	6021	0.00546865	20.0978	0.00299474
rs73275737	G	C	G	C	-0.4528	-0.2685	0.0135	0.0227	FALSE	TRUE	FALSE	LEo1UN	0.2031	0.1862	outcome	TRUE	reported	textfile	5	148626837	3657	0.1016	8.563e-06	1740	TRUE	reported	PDZ70W	0.0135	2	TRUE	6021	0.00540192	19.8512	0.00694796
rs62059362	T	C	T	C	0.1488	-0.0196	0.1683	0.2241	FALSE	FALSE	FALSE	LEo1UN	0.0613	0.7489	outcome	TRUE	reported	textfile	16	35271879	3657	0.03345	8.923e-06	1740	TRUE	reported	PDZ70W	0.1683	2	TRUE	6021	0.00538202	19.7777	0.000937027
rs17706571	T	C	T	C	0.439	0.2019	0.0164	0.0163	FALSE	FALSE	FALSE	LEo1UN	0.2071	0.3294	outcome	TRUE	reported	textfile	12	29271392	3657	0.0987	8.938e-06	1740	TRUE	reported	PDZ70W	0.0164	2	TRUE	6021	0.00538055	19.7723	0.00366474
rs80268044	A	G	A	G	0.1481	0.0245	0.1765	0.0954	FALSE	FALSE	FALSE	LEo1UN	0.0851	0.7736	outcome	TRUE	reported	textfile	2	43810948	3657	0.03347	9.937e-06	1740	TRUE	reported	PDZ70W	0.1765	2	TRUE	6021	0.00532543	19.5687	0.00093359
rs113812519	G	A	G	A	0.5095	0.2238	0.0185	0.0185	FALSE	FALSE	FALSE	RNkNvp	0.2056	0.2764	outcome	TRUE	reported	textfile	1	207276336	3658	0.09165	2.91e-08	1741	TRUE	reported	SdMw30	0.0185	2	TRUE	6021	0.00837772	30.8877	0.000208009
rs148381451	T	C	T	C	-0.2879	-0.0573	0.0496	0.0313	FALSE	FALSE	FALSE	RNkNvp	0.1684	0.7337	outcome	TRUE	reported	textfile	17	63085557	3658	0.05601	2.901e-07	1741	TRUE	reported	SdMw30	0.0496	2	TRUE	6021	0.00717105	26.4067	0.000123139
rs12216684	A	G	A	G	0.2695	-0.1754	0.0544	0.0717	FALSE	FALSE	FALSE	RNkNvp	0.0986	0.07542	outcome	TRUE	reported	textfile	7	56291533	3658	0.05355	5.057e-07	1741	TRUE	reported	SdMw30	0.0544	2	TRUE	6021	0.00687635	25.314	0.00408962
rs10894538	A	T	A	T	-0.1971	-0.0774	0.1059	0.2111	FALSE	TRUE	FALSE	RNkNvp	0.0603	0.1994	outcome	TRUE	reported	textfile	11	132222058	3658	0.03986	7.999e-07	1741	TRUE	reported	SdMw30	0.1059	2	TRUE	6021	0.0066399	24.4377	0.00189324
rs754067	C	T	C	T	-0.1891	0.0594	0.1143	0.2004	FALSE	FALSE	FALSE	RNkNvp	0.0638	0.3519	outcome	TRUE	reported	textfile	16	17323672	3658	0.03878	1.134e-06	1741	TRUE	reported	SdMw30	0.1143	2	TRUE	6021	0.00645818	23.7646	0.00107833
rs117004076	G	A	G	A	0.4855	0.2713	0.0146	0.0282	FALSE	FALSE	FALSE	RNkNvp	0.1695	0.1094	outcome	TRUE	reported	textfile	14	97702226	3658	0.1014	1.752e-06	1741	TRUE	reported	SdMw30	0.0146	2	TRUE	6021	0.00622796	22.9121	0.00529722
rs11120838	G	C	G	C	-0.29	0.0641	0.0433	0.0527	FALSE	TRUE	FALSE	RNkNvp	0.1112	0.5642	outcome	TRUE	reported	textfile	1	7149639	3658	0.06156	2.563e-06	1741	TRUE	reported	SdMw30	0.0433	2	TRUE	6021	0.00603015	22.18	0.000787431
rs80273434	C	G	C	G	-0.2514	-0.1263	0.0534	0.0679	FALSE	TRUE	FALSE	RNkNvp	0.1051	0.2297	outcome	TRUE	reported	textfile	8	141772905	3658	0.05379	3.062e-06	1741	TRUE	reported	SdMw30	0.0534	2	TRUE	6021	0.00593606	21.8318	0.00324324
rs1290397	A	G	A	G	0.1139	-0.0223	0.4899	0.5181	FALSE	FALSE	FALSE	RNkNvp	0.0509	0.6611	outcome	TRUE	reported	textfile	17	77948063	3658	0.02449	3.426e-06	1741	TRUE	reported	SdMw30	0.4899	2	TRUE	6021	0.00587849	21.6188	0.000686191
rs1449311	A	G	A	G	0.1247	0.0672	0.3074	0.2889	FALSE	FALSE	FALSE	RNkNvp	0.055	0.2222	outcome	TRUE	reported	textfile	3	100703124	3658	0.02709	4.33e-06	1741	TRUE	reported	SdMw30	0.3074	2	TRUE	6021	0.00575921	21.1776	0.00402937
rs116364947	T	A	T	A	0.4837	0.1528	0.0134	0.0206	FALSE	TRUE	FALSE	RNkNvp	0.2063	0.4589	outcome	TRUE	reported	textfile	6	36809211	3658	0.1051	4.342e-06	1741	TRUE	reported	SdMw30	0.0134	2	TRUE	6021	0.00575699	21.1694	0.00151985
rs2904880	G	C	G	C	0.1152	0.0135	0.4031	0.3159	FALSE	TRUE	FALSE	RNkNvp	0.053	0.7987	outcome	TRUE	reported	textfile	16	28944396	3658	0.02511	4.574e-06	1741	TRUE	reported	SdMw30	0.4031	2	TRUE	6021	0.00572105	21.0365	0.000543858
rs2903728	C	T	C	T	-0.1762	0.07	0.1147	0.2171	FALSE	FALSE	FALSE	RNkNvp	0.0598	0.2417	outcome	TRUE	reported	textfile	19	56408295	3658	0.03874	5.625e-06	1741	TRUE	reported	SdMw30	0.1147	2	TRUE	6021	0.00562341	20.6755	0.004181
rs8109226	G	T	G	T	0.1128	0.0838	0.437	0.3386	FALSE	FALSE	FALSE	RNkNvp	0.0572	0.1425	outcome	TRUE	reported	textfile	19	710050	3658	0.02483	5.776e-06	1741	TRUE	reported	SdMw30	0.437	2	TRUE	6021	0.00561019	20.6266	0.00738478
rs144392728	T	A	T	A	-0.2348	-0.1196	0.0586	0.029	FALSE	TRUE	FALSE	RNkNvp	0.1849	0.5176	outcome	TRUE	reported	textfile	22	33029820	3658	0.05183	6.068e-06	1741	TRUE	reported	SdMw30	0.0586	2	TRUE	6021	0.00557905	20.5114	0.00151473
rs1862061	T	C	T	C	-0.1395	-0.0584	0.1877	0.1818	FALSE	FALSE	FALSE	RNkNvp	0.0643	0.3634	outcome	TRUE	reported	textfile	2	16800618	3658	0.03097	6.851e-06	1741	TRUE	reported	SdMw30	0.1877	2	TRUE	6021	0.00551595	20.2782	0.00278191
rs10518007	T	A	T	A	0.1956	0.0699	0.0883	0.1509	FALSE	TRUE	FALSE	RNkNvp	0.0712	0.3263	outcome	TRUE	reported	textfile	4	67702525	3658	0.04356	7.319e-06	1741	TRUE	reported	SdMw30	0.0883	2	TRUE	6021	0.0054819	20.1523	0.00333894
rs34798965	A	C	A	C	-0.2013	-0.0639	0.0789	0.1076	FALSE	FALSE	FALSE	RNkNvp	0.081	0.4299	outcome	TRUE	reported	textfile	10	71647692	3658	0.04491	7.642e-06	1741	TRUE	reported	SdMw30	0.0789	2	TRUE	6021	0.00546234	20.08	0.00231239
rs17433679	G	A	G	A	0.1688	0.2152	0.1227	0.0984	FALSE	FALSE	FALSE	RNkNvp	0.0851	0.01146	outcome	TRUE	reported	textfile	7	78097255	3658	0.03772	7.851e-06	1741	TRUE	reported	SdMw30	0.1227	2	TRUE	6021	0.00544486	20.0154	0.0486062
rs557939103	A	G	A	G	0.3461	0.3365	0.0284	0.0213	FALSE	FALSE	FALSE	RNkNvp	0.2182	0.1231	outcome	TRUE	reported	textfile	8	9079951	3658	0.07768	8.598e-06	1741	TRUE	reported	SdMw30	0.0284	2	TRUE	6021	0.00539747	19.8403	0.0103828
rs78044532	T	C	T	C	0.3991	-0.0932	0.0187	0.0229	FALSE	FALSE	FALSE	RNkNvp	0.1792	0.603	outcome	TRUE	reported	textfile	16	21168467	3658	0.08984	9.138e-06	1741	TRUE	reported	SdMw30	0.0187	2	TRUE	6021	0.00536591	19.7236	0.00146943
rs79550250	A	G	A	G	-0.4057	-0.0079	0.0183	0.0505	FALSE	FALSE	FALSE	RNkNvp	0.1187	0.9467	outcome	TRUE	reported	textfile	4	13123693	3658	0.09157	9.665e-06	1741	TRUE	reported	SdMw30	0.0183	2	TRUE	6021	0.00533747	19.6185	0.000560392
rs34589185	T	G	T	G	0.1143	0.001	0.3477	0.3812	FALSE	FALSE	FALSE	RNkNvp	0.0515	0.9838	outcome	TRUE	reported	textfile	19	50761130	3658	0.02583	9.87e-06	1741	TRUE	reported	SdMw30	0.3477	2	TRUE	6021	0.00532453	19.5707	0.000511203
rs113812519	G	A	G	A	0.5863	0.2238	0.0185	0.0185	FALSE	FALSE	FALSE	TqHnNZ	0.2056	0.2764	outcome	TRUE	reported	textfile	1	207276336	3657	0.09251	2.612e-10	1742	TRUE	reported	jYrFmX	0.0185	2	TRUE	6021	0.0108641	40.1444	1.55739e-05
rs144743804	A	G	A	G	0.539	0.5584	0.0197	0.0181	FALSE	FALSE	FALSE	TqHnNZ	0.2625	0.03343	outcome	TRUE	reported	textfile	1	207018206	3657	0.09004	2.357e-09	1742	TRUE	reported	jYrFmX	0.0197	2	TRUE	6021	0.00970391	35.8153	0.000658276
rs116180572	T	G	T	G	0.1959	0.0932	0.1325	0.1317	FALSE	FALSE	FALSE	TqHnNZ	0.0706	0.1864	outcome	TRUE	reported	textfile	3	61084498	3657	0.03689	1.158e-07	1742	TRUE	reported	jYrFmX	0.1325	2	TRUE	6021	0.00765227	28.1847	0.000747325
rs62037424	T	C	T	C	-0.5549	0.202	0.0135	0.0227	FALSE	FALSE	FALSE	TqHnNZ	0.2096	0.3351	outcome	TRUE	reported	textfile	16	28979854	3657	0.1054	1.478e-07	1742	TRUE	reported	jYrFmX	0.0135	2	TRUE	6021	0.00752219	27.702	0.000378388
rs148381451	T	C	T	C	-0.2814	-0.0573	0.0496	0.0313	FALSE	FALSE	FALSE	TqHnNZ	0.1684	0.7337	outcome	TRUE	reported	textfile	17	63085557	3657	0.05662	7.029e-07	1742	TRUE	reported	jYrFmX	0.0496	2	TRUE	6021	0.00670903	24.6871	0.000210338
rs12216684	A	G	A	G	0.2634	-0.1754	0.0543	0.0717	FALSE	FALSE	FALSE	TqHnNZ	0.0986	0.07542	outcome	TRUE	reported	textfile	7	56291533	3657	0.05419	1.226e-06	1742	TRUE	reported	jYrFmX	0.0543	2	TRUE	6021	0.00641906	23.6132	0.00621429
rs115570551	A	G	A	G	0.1722	0.0672	0.1319	0.1659	FALSE	FALSE	FALSE	TqHnNZ	0.0689	0.3295	outcome	TRUE	reported	textfile	14	53874261	3657	0.03666	2.72e-06	1742	TRUE	reported	jYrFmX	0.1319	2	TRUE	6021	0.00599714	22.0518	0.00192521
rs9459447	A	C	A	C	-0.1392	0.0017	0.2211	0.2123	FALSE	FALSE	FALSE	TqHnNZ	0.0617	0.9777	outcome	TRUE	reported	textfile	6	165954369	3657	0.02982	3.129e-06	1742	TRUE	reported	jYrFmX	0.2211	2	TRUE	6021	0.00592322	21.7784	0.000251186
rs1667906	G	T	G	T	0.1358	0.038	0.2233	0.3209	FALSE	FALSE	FALSE	TqHnNZ	0.0524	0.469	outcome	TRUE	reported	textfile	18	74839524	3657	0.02914	3.301e-06	1742	TRUE	reported	jYrFmX	0.2233	2	TRUE	6021	0.0059037	21.7062	0.00125447
rs933570	C	T	C	T	-0.1173	-0.0474	0.4184	0.5234	FALSE	FALSE	FALSE	TqHnNZ	0.0516	0.3583	outcome	TRUE	reported	textfile	16	11760186	3657	0.02522	3.413e-06	1742	TRUE	reported	jYrFmX	0.4184	2	TRUE	6021	0.00588057	21.6206	0.00193452
rs151295797	G	A	G	A	0.524	-0.1898	0.012	0.0243	FALSE	FALSE	FALSE	TqHnNZ	0.2022	0.3479	outcome	TRUE	reported	textfile	16	84071182	3657	0.1128	3.499e-06	1742	TRUE	reported	jYrFmX	0.012	2	TRUE	6021	0.0058663	21.5678	0.00204716
rs2026774	C	T	C	T	0.1558	0.0991	0.1648	0.8919	FALSE	FALSE	FALSE	TqHnNZ	0.0794	0.212	outcome	TRUE	reported	textfile	1	86076069	3657	0.03355	3.575e-06	1742	TRUE	reported	jYrFmX	0.1648	2	TRUE	6021	0.00586235	21.5532	0.00382913
rs9949821	A	G	A	G	0.1581	-0.0868	0.1555	0.2011	FALSE	FALSE	FALSE	TqHnNZ	0.0614	0.1579	outcome	TRUE	reported	textfile	18	54242149	3657	0.03432	4.233e-06	1742	TRUE	reported	jYrFmX	0.1555	2	TRUE	6021	0.00576941	21.2096	0.0057637
rs2290055	G	T	G	T	-0.1405	-0.094	0.2149	0.225	FALSE	FALSE	FALSE	TqHnNZ	0.0594	0.1134	outcome	TRUE	reported	textfile	3	108549720	3657	0.03061	4.573e-06	1742	TRUE	reported	jYrFmX	0.2149	2	TRUE	6021	0.00572804	21.0566	0.00819053
rs28626305	T	C	T	C	-0.1289	-0.0402	0.2648	0.4294	FALSE	FALSE	FALSE	TqHnNZ	0.0503	0.4242	outcome	TRUE	reported	textfile	16	24921264	3657	0.02824	5.179e-06	1742	TRUE	reported	jYrFmX	0.2648	2	TRUE	6021	0.0056648	20.8228	0.00190047
rs935131	A	G	A	G	0.1185	0.0515	0.3652	0.2813	FALSE	FALSE	FALSE	TqHnNZ	0.0552	0.3499	outcome	TRUE	reported	textfile	15	65625991	3657	0.02598	5.239e-06	1742	TRUE	reported	jYrFmX	0.3652	2	TRUE	6021	0.00565679	20.7932	0.00252274
rs77953960	T	C	T	C	0.2724	0.0553	0.0447	0.0588	FALSE	FALSE	FALSE	TqHnNZ	0.1058	0.6011	outcome	TRUE	reported	textfile	5	9427816	3657	0.06029	6.443e-06	1742	TRUE	reported	jYrFmX	0.0447	2	TRUE	6021	0.00555113	20.4026	0.00119991
rs117442206	T	C	T	C	-0.2627	0.1041	0.0481	0.034	FALSE	FALSE	FALSE	TqHnNZ	0.1545	0.5004	outcome	TRUE	reported	textfile	12	25430787	3657	0.05852	7.339e-06	1742	TRUE	reported	jYrFmX	0.0481	2	TRUE	6021	0.00548024	20.1407	0.00178926
rs13030427	A	G	A	G	0.1413	0.0202	0.1957	0.1482	FALSE	FALSE	FALSE	TqHnNZ	0.0697	0.7713	outcome	TRUE	reported	textfile	2	208879261	3657	0.03174	8.807e-06	1742	TRUE	reported	jYrFmX	0.1957	2	TRUE	6021	0.00539012	19.8076	0.000869017
rs62519592	G	A	G	A	-0.2118	0.182	0.076	0.0667	FALSE	FALSE	FALSE	TqHnNZ	0.0994	0.06708	outcome	TRUE	reported	textfile	8	133193809	3657	0.04767	9.104e-06	1742	TRUE	reported	jYrFmX	0.076	2	TRUE	6021	0.00536906	19.7299	0.0175089
rs1941018	G	A	G	A	-0.1808	0.0154	0.3921	0.5392	FALSE	FALSE	FALSE	MWjoHb	0.0493	0.7549	outcome	TRUE	reported	textfile	11	60268994	3660	0.02489	4.629e-13	1743	TRUE	reported	1UR1d6	0.3921	2	TRUE	6021	0.0142118	52.7363	3.34323e-08
rs354026	T	G	T	G	0.1996	0.0935	0.2331	0.7429	FALSE	FALSE	FALSE	MWjoHb	0.0553	0.0907	outcome	TRUE	reported	textfile	19	49841054	3660	0.0293	1.122e-11	1743	TRUE	reported	1UR1d6	0.2331	2	TRUE	6021	0.0125208	46.3819	1.55075e-05
rs12212931	G	T	G	T	0.2121	-0.0752	0.1803	0.8291	FALSE	FALSE	FALSE	MWjoHb	0.0648	0.2459	outcome	TRUE	reported	textfile	6	15913304	3660	0.03182	3.016e-11	1743	TRUE	reported	1UR1d6	0.1803	2	TRUE	6021	0.0119939	44.4062	5.83324e-06
rs388354	C	A	C	A	-0.1212	-0.0534	0.4795	0.6045	FALSE	FALSE	FALSE	MWjoHb	0.0503	0.2879	outcome	TRUE	reported	textfile	7	40190449	3660	0.02446	7.505e-07	1743	TRUE	reported	1UR1d6	0.4795	2	TRUE	6021	0.00666358	24.5389	0.00115236
rs72836542	T	C	T	C	0.1332	-0.0435	0.3163	0.2874	FALSE	FALSE	FALSE	MWjoHb	0.0541	0.4209	outcome	TRUE	reported	textfile	6	14091682	3660	0.02695	8.012e-07	1743	TRUE	reported	1UR1d6	0.3163	2	TRUE	6021	0.00663011	24.4148	0.000676608
rs75097128	G	A	G	A	-0.4658	0.1558	0.0164	0.0456	FALSE	FALSE	FALSE	MWjoHb	0.1192	0.191	outcome	TRUE	reported	textfile	4	113292746	3660	0.09509	1.008e-06	1743	TRUE	reported	1UR1d6	0.0164	2	TRUE	6021	0.00651344	23.9824	0.00224949
rs11051833	T	C	T	C	-0.359	0.134	0.0286	0.0813	FALSE	FALSE	FALSE	MWjoHb	0.0918	0.1445	outcome	TRUE	reported	textfile	12	32330242	3660	0.07394	1.252e-06	1743	TRUE	reported	1UR1d6	0.0286	2	TRUE	6021	0.00639971	23.5609	0.00341871
rs77612075	T	C	T	C	0.3491	-0.0087	0.0292	0.0492	FALSE	FALSE	FALSE	MWjoHb	0.1212	0.9428	outcome	TRUE	reported	textfile	5	162820460	3660	0.07197	1.287e-06	1743	TRUE	reported	1UR1d6	0.0292	2	TRUE	6021	0.00638753	23.5158	0.000158821
rs6496328	T	C	T	C	-0.3019	0.0946	0.0387	0.1236	FALSE	FALSE	FALSE	MWjoHb	0.0751	0.2077	outcome	TRUE	reported	textfile	15	86988686	3660	0.0635	2.064e-06	1743	TRUE	reported	1UR1d6	0.0387	2	TRUE	6021	0.00613796	22.5913	0.00296891
rs233495	T	C	T	C	-0.1168	0.0208	0.4415	0.5272	FALSE	FALSE	FALSE	MWjoHb	0.0495	0.6748	outcome	TRUE	reported	textfile	6	14806317	3660	0.02485	2.707e-06	1743	TRUE	reported	1UR1d6	0.4415	2	TRUE	6021	0.00599982	22.0798	0.000572315
rs8025257	C	T	C	T	-0.1367	-0.019	0.2286	0.1849	FALSE	FALSE	FALSE	MWjoHb	0.0634	0.7645	outcome	TRUE	reported	textfile	15	89600226	3660	0.02943	3.51e-06	1743	TRUE	reported	1UR1d6	0.2286	2	TRUE	6021	0.00586034	21.5635	0.000510796
rs80155794	A	G	A	G	-0.3406	0.0556	0.0266	0.0686	FALSE	FALSE	FALSE	MWjoHb	0.101	0.5819	outcome	TRUE	reported	textfile	5	178957291	3660	0.07416	4.521e-06	1743	TRUE	reported	1UR1d6	0.0266	2	TRUE	6021	0.00573024	21.082	0.00103865
rs79003098	A	T	A	T	-0.1544	-0.0232	0.1589	0.2103	FALSE	TRUE	FALSE	MWjoHb	0.0602	0.6996	outcome	TRUE	reported	textfile	2	81965038	3660	0.03365	4.607e-06	1743	TRUE	reported	1UR1d6	0.1589	2	TRUE	6021	0.00571942	21.042	0.000730377
rs113371046	A	G	A	G	0.2296	0.0157	0.0638	0.0583	FALSE	FALSE	FALSE	MWjoHb	0.1101	0.8867	outcome	TRUE	reported	textfile	1	17595034	3660	0.05076	6.296e-06	1743	TRUE	reported	1UR1d6	0.0638	2	TRUE	6021	0.00555902	20.4486	0.000509093
rs78296478	A	C	A	C	0.4003	0.0166	0.0193	0.0689	FALSE	FALSE	FALSE	MWjoHb	0.1032	0.872	outcome	TRUE	reported	textfile	2	125069044	3660	0.08882	6.771e-06	1743	TRUE	reported	1UR1d6	0.0193	2	TRUE	6021	0.00551906	20.3008	0.000556812
rs13109614	G	A	G	A	0.1321	-0.0279	0.2333	0.2891	FALSE	FALSE	FALSE	MWjoHb	0.0535	0.6014	outcome	TRUE	reported	textfile	4	62019413	3660	0.02942	7.391e-06	1743	TRUE	reported	1UR1d6	0.2333	2	TRUE	6021	0.0054784	20.1504	0.00129554
rs4768810	T	C	T	C	0.2022	-0.0937	0.0821	0.1407	FALSE	FALSE	FALSE	MWjoHb	0.0732	0.2006	outcome	TRUE	reported	textfile	12	47866824	3660	0.04515	7.726e-06	1743	TRUE	reported	1UR1d6	0.0821	2	TRUE	6021	0.00544995	20.0452	0.006117
rs75071948	G	T	G	T	0.2626	0.2354	0.0452	0.0382	FALSE	FALSE	FALSE	MWjoHb	0.1422	0.09775	outcome	TRUE	reported	textfile	9	75768836	3660	0.05919	9.45e-06	1743	TRUE	reported	1UR1d6	0.0452	2	TRUE	6021	0.00534912	19.6723	0.0132187
rs28620974	C	G	C	G	0.2243	0.0164	0.0635	0.098	FALSE	TRUE	FALSE	MWjoHb	0.0836	0.8444	outcome	TRUE	reported	textfile	4	137463130	3660	0.05059	9.543e-06	1743	TRUE	reported	1UR1d6	0.0635	2	TRUE	6021	0.00534222	19.6468	0.00074474
rs73245560	C	T	C	T	0.4108	-0.0737	0.0182	0.0348	FALSE	FALSE	FALSE	MWjoHb	0.1467	0.6154	outcome	TRUE	reported	textfile	4	43987474	3660	0.09274	9.7e-06	1743	TRUE	reported	1UR1d6	0.0182	2	TRUE	6021	0.00533241	19.6105	0.00146721
rs34280838	C	T	C	T	-0.1648	0.2495	0.1735	0.0318	FALSE	FALSE	FALSE	RP3bch	0.1518	0.1002	outcome	TRUE	reported	textfile	6	32139565	3606	0.03318	7.121e-07	1744	TRUE	reported	JMYvTv	0.1735	2	TRUE	6021	0.00679477	24.6559	0.00352788
rs41329345	C	T	C	T	-0.1267	-0.0443	0.3636	0.2033	FALSE	FALSE	FALSE	RP3bch	0.0631	0.4824	outcome	TRUE	reported	textfile	7	48456925	3606	0.02568	8.38e-07	1744	TRUE	reported	JMYvTv	0.3636	2	TRUE	6021	0.00670526	24.3289	0.000525163
rs73015549	G	C	G	C	0.2735	0.025	0.046	0.0901	FALSE	TRUE	FALSE	RP3bch	0.0963	0.7953	outcome	TRUE	reported	textfile	3	7495328	3606	0.05925	4.042e-06	1744	TRUE	reported	JMYvTv	0.046	2	TRUE	6021	0.00587427	21.2959	0.000486965
rs10426452	A	G	A	G	-0.115	0.0556	0.3816	0.2889	FALSE	FALSE	FALSE	RP3bch	0.0546	0.3082	outcome	TRUE	reported	textfile	19	49907690	3606	0.02506	4.64e-06	1744	TRUE	reported	JMYvTv	0.3816	2	TRUE	6021	0.00580603	21.0471	0.00267986
rs1318389	C	A	C	A	0.3135	0.1476	0.0336	0.9858	FALSE	FALSE	FALSE	RP3bch	0.2667	0.58	outcome	TRUE	reported	textfile	13	35149649	3606	0.06855	4.942e-06	1744	TRUE	reported	JMYvTv	0.0336	2	TRUE	6021	0.00576664	20.9035	0.00105908
rs145619091	C	G	C	G	0.3296	0.0425	0.0294	0.0171	FALSE	TRUE	FALSE	RP3bch	0.2484	0.8641	outcome	TRUE	reported	textfile	17	4261253	3606	0.07367	7.911e-06	1744	TRUE	reported	JMYvTv	0.0294	2	TRUE	6021	0.00552031	20.0056	0.000603596
rs79248632	T	C	T	C	-0.2045	-0.0481	0.0799	0.0751	FALSE	FALSE	FALSE	RP3bch	0.0932	0.6057	outcome	TRUE	reported	textfile	5	158319820	3606	0.04571	7.96e-06	1744	TRUE	reported	JMYvTv	0.0799	2	TRUE	6021	0.00551994	20.0043	0.00128741
rs5997212	A	T	A	T	-0.2309	0.2854	0.062	0.0433	FALSE	TRUE	FALSE	RP3bch	0.1273	0.02492	outcome	TRUE	reported	textfile	22	27679924	3606	0.05166	8.068e-06	1744	TRUE	reported	JMYvTv	0.062	2	TRUE	6021	0.00550952	19.9663	0.0308078
rs4921509	C	G	C	G	-0.112	0.0269	0.3813	0.3823	FALSE	TRUE	FALSE	RP3bch	0.0506	0.5947	outcome	TRUE	reported	textfile	5	159000854	3606	0.02517	8.796e-06	1744	TRUE	reported	JMYvTv	0.3813	2	TRUE	6021	0.00546092	19.7892	0.00142148
rs1558186	A	G	A	G	-0.1098	0.0966	0.4377	0.4224	FALSE	FALSE	FALSE	RP3bch	0.0506	0.05645	outcome	TRUE	reported	textfile	5	133041544	3606	0.02473	9.321e-06	1744	TRUE	reported	JMYvTv	0.4377	2	TRUE	6021	0.00543705	19.7022	0.019296
rs12952217	G	C	G	C	-0.1326	-0.0269	0.2121	0.1678	FALSE	TRUE	FALSE	RP3bch	0.0697	0.6991	outcome	TRUE	reported	textfile	17	1018426	3606	0.02994	9.782e-06	1744	TRUE	reported	JMYvTv	0.2121	2	TRUE	6021	0.00541006	19.6039	0.00110269
rs35857670	A	G	A	G	0.1754	-0.1036	0.1104	0.1077	FALSE	FALSE	FALSE	RP3bch	0.0827	0.2101	outcome	TRUE	reported	textfile	10	82607555	3606	0.03963	9.861e-06	1744	TRUE	reported	JMYvTv	0.1104	2	TRUE	6021	0.00540297	19.5781	0.00632832
rs55809481	C	T	C	T	-0.283	-0.0907	0.2425	0.2484	FALSE	FALSE	FALSE	l1A7eE	0.0558	0.1042	outcome	TRUE	reported	textfile	19	49872521	3657	0.0286	8.18e-23	1745	TRUE	reported	kDaIkO	0.2425	2	TRUE	6021	0.026076	97.8596	1.28021e-11
rs74621542	C	T	C	T	-0.2878	-0.0862	0.0917	0.0793	FALSE	FALSE	FALSE	l1A7eE	0.0916	0.3464	outcome	TRUE	reported	textfile	11	60166613	3657	0.04216	1.026e-11	1745	TRUE	reported	kDaIkO	0.0917	2	TRUE	6021	0.0125822	46.5739	1.63329e-06
rs6459417	T	C	T	C	0.2138	0.0274	0.1263	0.9133	FALSE	FALSE	FALSE	l1A7eE	0.0868	0.7525	outcome	TRUE	reported	textfile	6	15858996	3657	0.03693	7.666e-09	1745	TRUE	reported	kDaIkO	0.1263	2	TRUE	6021	0.00908175	33.498	1.27092e-05
rs11187166	T	C	T	C	0.1756	-0.0712	0.1993	0.1821	FALSE	FALSE	FALSE	l1A7eE	0.064	0.2659	outcome	TRUE	reported	textfile	10	94516008	3657	0.03165	3.073e-08	1745	TRUE	reported	kDaIkO	0.1993	2	TRUE	6021	0.00834711	30.7655	0.00022782
rs61731791	T	C	T	C	0.2236	-0.1812	0.0972	0.0363	FALSE	FALSE	FALSE	l1A7eE	0.1374	0.1873	outcome	TRUE	reported	textfile	19	50940778	3657	0.04215	1.197e-07	1745	TRUE	reported	kDaIkO	0.0972	2	TRUE	6021	0.0076365	28.1262	0.000756918
rs62340965	A	T	A	T	-0.1508	0.0631	0.2158	0.1716	FALSE	TRUE	FALSE	l1A7eE	0.0893	0.4799	outcome	TRUE	reported	textfile	4	190508875	3657	0.03126	1.455e-06	1745	TRUE	reported	kDaIkO	0.2158	2	TRUE	6021	0.00632332	23.2588	0.000761545
rs2114442	T	C	T	C	0.1204	0.0468	0.4249	0.4386	FALSE	FALSE	FALSE	l1A7eE	0.0493	0.3421	outcome	TRUE	reported	textfile	4	100832060	3657	0.02503	1.571e-06	1745	TRUE	reported	kDaIkO	0.4249	2	TRUE	6021	0.00628734	23.1256	0.00134411
rs7128035	C	T	C	T	-0.1306	-0.0487	0.2893	0.707	FALSE	FALSE	FALSE	l1A7eE	0.0533	0.3607	outcome	TRUE	reported	textfile	11	268078	3657	0.02723	1.683e-06	1745	TRUE	reported	kDaIkO	0.2893	2	TRUE	6021	0.0062509	22.9908	0.00129439
rs149695230	G	T	G	T	0.1899	-0.1162	0.1079	0.0744	FALSE	FALSE	FALSE	l1A7eE	0.1018	0.2536	outcome	TRUE	reported	textfile	11	60288804	3657	0.04009	2.27e-06	1745	TRUE	reported	kDaIkO	0.1079	2	TRUE	6021	0.00609813	22.4254	0.00244069
rs179212	C	T	C	T	-0.2158	0.1278	0.0772	0.0647	FALSE	FALSE	FALSE	l1A7eE	0.1027	0.2131	outcome	TRUE	reported	textfile	16	19308868	3657	0.04605	2.877e-06	1745	TRUE	reported	kDaIkO	0.0772	2	TRUE	6021	0.00596923	21.9486	0.00341674
rs12554596	G	A	G	A	-0.1172	0.0314	0.3891	0.2119	FALSE	FALSE	FALSE	l1A7eE	0.0632	0.6186	outcome	TRUE	reported	textfile	9	37002142	3657	0.02548	4.392e-06	1745	TRUE	reported	kDaIkO	0.3891	2	TRUE	6021	0.0057521	21.1455	0.000903719
rs75071948	G	T	G	T	0.2686	0.2354	0.0453	0.0382	FALSE	FALSE	FALSE	l1A7eE	0.1422	0.09775	outcome	TRUE	reported	textfile	9	75768836	3657	0.05894	5.349e-06	1745	TRUE	reported	kDaIkO	0.0453	2	TRUE	6021	0.00564687	20.7565	0.0100679
rs2578469	A	G	A	G	-0.117	0.0087	0.3246	0.2829	FALSE	FALSE	FALSE	l1A7eE	0.0577	0.8807	outcome	TRUE	reported	textfile	12	4101401	3657	0.02578	5.915e-06	1745	TRUE	reported	kDaIkO	0.3246	2	TRUE	6021	0.00560069	20.5858	0.00049511
rs77612075	T	C	T	C	0.3243	-0.0087	0.0293	0.0492	FALSE	FALSE	FALSE	l1A7eE	0.1212	0.9428	outcome	TRUE	reported	textfile	5	162820460	3657	0.07158	6.047e-06	1745	TRUE	reported	kDaIkO	0.0293	2	TRUE	6021	0.00558155	20.5151	0.000422206
rs61958965	T	C	T	C	-0.3982	-0.0942	0.0198	0.0441	FALSE	FALSE	FALSE	l1A7eE	0.144	0.5128	outcome	TRUE	reported	textfile	13	72232674	3657	0.08835	6.783e-06	1745	TRUE	reported	kDaIkO	0.0198	2	TRUE	6021	0.00552406	20.3026	0.00163621
rs78850316	T	C	T	C	-0.3566	0.0256	0.025	0.0645	FALSE	FALSE	FALSE	l1A7eE	0.1072	0.8116	outcome	TRUE	reported	textfile	10	99560231	3657	0.07941	7.337e-06	1745	TRUE	reported	kDaIkO	0.025	2	TRUE	6021	0.00548402	20.1546	0.00069459
rs114915558	G	A	G	A	0.2952	0.2143	0.0384	0.0515	FALSE	FALSE	FALSE	l1A7eE	0.1207	0.07583	outcome	TRUE	reported	textfile	5	98564385	3657	0.06578	7.44e-06	1745	TRUE	reported	kDaIkO	0.0384	2	TRUE	6021	0.0054769	20.1283	0.0144827
rs13080324	A	C	A	C	0.1124	-0.0294	0.4322	0.3284	FALSE	FALSE	FALSE	l1A7eE	0.0522	0.5736	outcome	TRUE	reported	textfile	3	111952407	3657	0.02505	7.45e-06	1745	TRUE	reported	kDaIkO	0.4322	2	TRUE	6021	0.0054753	20.1224	0.00142519
rs7035906	A	G	A	G	0.2833	-0.0068	0.0416	0.0644	FALSE	FALSE	FALSE	l1A7eE	0.1063	0.9491	outcome	TRUE	reported	textfile	9	95898832	3657	0.06325	7.739e-06	1745	TRUE	reported	kDaIkO	0.0416	2	TRUE	6021	0.00545596	20.0509	0.000482909
rs295654	T	C	T	C	0.1139	-0.022	0.3887	0.5543	FALSE	FALSE	FALSE	l1A7eE	0.0495	0.6571	outcome	TRUE	reported	textfile	5	58107171	3657	0.02545	7.89e-06	1745	TRUE	reported	kDaIkO	0.3887	2	TRUE	6021	0.00544722	20.0186	0.00114039
rs111896387	T	C	T	C	0.2156	-0.1293	0.0786	0.069	FALSE	FALSE	FALSE	l1A7eE	0.0979	0.1865	outcome	TRUE	reported	textfile	12	45116844	3657	0.04829	8.279e-06	1745	TRUE	reported	kDaIkO	0.0786	2	TRUE	6021	0.00542122	19.9226	0.00680164
rs55809481	C	T	C	T	-0.2125	-0.0907	0.2425	0.2484	FALSE	FALSE	FALSE	lDSAPY	0.0558	0.1042	outcome	TRUE	reported	textfile	19	49872521	3657	0.0287	1.605e-13	1746	TRUE	reported	mBvQu4	0.2425	2	TRUE	6021	0.0147695	54.7919	1.39155e-06
rs1569590	G	A	G	A	0.2082	0.078	0.1252	0.9171	FALSE	FALSE	FALSE	lDSAPY	0.0895	0.3832	outcome	TRUE	reported	textfile	6	15898884	3657	0.03692	1.845e-08	1746	TRUE	reported	mBvQu4	0.1252	2	TRUE	6021	0.00862091	31.7834	9.39997e-05
rs1941033	T	C	T	C	-0.2221	-0.0151	0.0982	0.0809	FALSE	FALSE	FALSE	lDSAPY	0.0912	0.8686	outcome	TRUE	reported	textfile	11	60249526	3657	0.04155	9.596e-08	1746	TRUE	reported	mBvQu4	0.0982	2	TRUE	6021	0.00775265	28.5573	3.98019e-05
rs62340965	A	T	A	T	-0.1558	0.0631	0.2158	0.1716	FALSE	TRUE	FALSE	lDSAPY	0.0893	0.4799	outcome	TRUE	reported	textfile	4	190508875	3657	0.03118	6.077e-07	1746	TRUE	reported	mBvQu4	0.2158	2	TRUE	6021	0.00678114	24.9543	0.000461441
rs61731791	T	C	T	C	0.2089	-0.1812	0.0972	0.0363	FALSE	FALSE	FALSE	lDSAPY	0.1374	0.1873	outcome	TRUE	reported	textfile	19	50940778	3657	0.04207	7.147e-07	1746	TRUE	reported	mBvQu4	0.0972	2	TRUE	6021	0.00669713	24.643	0.00192595
rs4746507	A	C	A	C	0.1293	-0.0139	0.3258	0.5849	FALSE	FALSE	FALSE	lDSAPY	0.0503	0.7821	outcome	TRUE	reported	textfile	10	67086564	3657	0.02634	9.573e-07	1746	TRUE	reported	mBvQu4	0.3258	2	TRUE	6021	0.00654618	24.084	0.00021771
rs7128035	C	T	C	T	-0.1284	-0.0487	0.2893	0.707	FALSE	FALSE	FALSE	lDSAPY	0.0533	0.3607	outcome	TRUE	reported	textfile	11	268078	3657	0.02718	2.42e-06	1746	TRUE	reported	mBvQu4	0.2893	2	TRUE	6021	0.00606546	22.3046	0.0015749
rs114915558	G	A	G	A	0.305	0.2143	0.0384	0.0515	FALSE	FALSE	FALSE	lDSAPY	0.1207	0.07583	outcome	TRUE	reported	textfile	5	98564385	3657	0.06562	3.465e-06	1746	TRUE	reported	mBvQu4	0.0384	2	TRUE	6021	0.00587279	21.5918	0.010137
rs79110866	G	A	G	A	0.2849	0.113	0.0421	0.0408	FALSE	FALSE	FALSE	lDSAPY	0.1383	0.4139	outcome	TRUE	reported	textfile	9	75709022	3657	0.06153	3.789e-06	1746	TRUE	reported	mBvQu4	0.0421	2	TRUE	6021	0.00582837	21.4276	0.00165439
rs116729050	A	G	A	G	-0.2379	-0.2031	0.0591	0.0254	FALSE	FALSE	FALSE	lDSAPY	0.1873	0.2782	outcome	TRUE	reported	textfile	1	62560039	3657	0.05211	5.171e-06	1746	TRUE	reported	mBvQu4	0.0591	2	TRUE	6021	0.00566701	20.831	0.00338063
rs2532969	T	C	T	C	0.1154	0.0582	0.3444	0.4236	FALSE	FALSE	FALSE	lDSAPY	0.0498	0.2433	outcome	TRUE	reported	textfile	13	50896167	3657	0.02577	7.799e-06	1746	TRUE	reported	mBvQu4	0.3444	2	TRUE	6021	0.00545359	20.0422	0.00494841
rs4700466	C	T	C	T	-0.1101	0.0305	0.4844	0.6094	FALSE	FALSE	FALSE	lDSAPY	0.0507	0.5479	outcome	TRUE	reported	textfile	5	61352528	3657	0.02461	8.012e-06	1746	TRUE	reported	mBvQu4	0.4844	2	TRUE	6021	0.00544322	20.0039	0.00160215
rs66637059	T	C	T	C	-0.1563	0.0107	0.1479	0.1604	FALSE	FALSE	FALSE	lDSAPY	0.0724	0.8825	outcome	TRUE	reported	textfile	17	17417808	3657	0.03511	8.739e-06	1746	TRUE	reported	mBvQu4	0.1479	2	TRUE	6021	0.00538994	19.807	0.000633034
rs11662753	G	C	G	C	0.1706	-0.0925	0.1124	0.0992	FALSE	TRUE	FALSE	lDSAPY	0.0836	0.2689	outcome	TRUE	reported	textfile	18	60657744	3657	0.03846	9.478e-06	1746	TRUE	reported	mBvQu4	0.1124	2	TRUE	6021	0.00535161	19.6654	0.00487262
rs4939384	G	A	G	A	-0.2046	0.0184	0.3912	0.5405	FALSE	FALSE	FALSE	5mqf6e	0.0494	0.7088	outcome	TRUE	reported	textfile	11	60273642	3657	0.02482	2.292e-16	1747	TRUE	reported	nRGisY	0.3912	2	TRUE	6021	0.0182426	67.9157	4.03712e-10
rs2066399	A	G	A	G	0.2255	-0.0556	0.179	0.8306	FALSE	FALSE	FALSE	5mqf6e	0.0651	0.3929	outcome	TRUE	reported	textfile	6	15880540	3657	0.03219	2.948e-12	1747	TRUE	reported	nRGisY	0.179	2	TRUE	6021	0.0132415	49.0471	6.10596e-07
rs72836542	T	C	T	C	0.1645	-0.0435	0.3161	0.2874	FALSE	FALSE	FALSE	5mqf6e	0.0541	0.4209	outcome	TRUE	reported	textfile	6	14091682	3657	0.02685	9.87e-10	1747	TRUE	reported	nRGisY	0.3161	2	TRUE	6021	0.0101598	37.5151	1.49356e-05
rs388354	C	A	C	A	-0.1327	-0.0534	0.4795	0.6045	FALSE	FALSE	FALSE	5mqf6e	0.0503	0.2879	outcome	TRUE	reported	textfile	7	40190449	3657	0.0244	5.706e-08	1747	TRUE	reported	nRGisY	0.4795	2	TRUE	6021	0.00802304	29.5614	0.000282201
rs7404890	A	G	A	G	0.1749	0.0034	0.1792	0.7608	FALSE	FALSE	FALSE	5mqf6e	0.0592	0.9544	outcome	TRUE	reported	textfile	16	11007193	3657	0.03258	8.424e-08	1747	TRUE	reported	nRGisY	0.1792	2	TRUE	6021	0.00781886	28.8031	2.7514e-05
rs11083972	G	C	G	C	-0.155	-0.0956	0.2234	0.2412	FALSE	TRUE	FALSE	5mqf6e	0.0572	0.09452	outcome	TRUE	reported	textfile	19	49896752	3657	0.02995	2.411e-07	1747	TRUE	reported	nRGisY	0.2234	2	TRUE	6021	0.00727069	26.769	0.00229116
rs55643835	T	C	T	C	-0.2783	-0.0428	0.0567	0.0854	FALSE	FALSE	FALSE	5mqf6e	0.0912	0.6389	outcome	TRUE	reported	textfile	6	33947909	3657	0.05397	2.665e-07	1747	TRUE	reported	nRGisY	0.0567	2	TRUE	6021	0.00721855	26.5757	0.000160901
rs233495	T	C	T	C	-0.124	0.0208	0.4415	0.5272	FALSE	FALSE	FALSE	5mqf6e	0.0495	0.6748	outcome	TRUE	reported	textfile	6	14806317	3657	0.02479	5.902e-07	1747	TRUE	reported	nRGisY	0.4415	2	TRUE	6021	0.00679523	25.0065	0.000231121
rs1007337	T	C	T	C	-0.1254	0.0102	0.3976	0.6592	FALSE	FALSE	FALSE	5mqf6e	0.0521	0.8452	outcome	TRUE	reported	textfile	22	39781585	3657	0.02513	6.28e-07	1747	TRUE	reported	nRGisY	0.3976	2	TRUE	6021	0.00676298	24.887	0.000138493
rs113371046	A	G	A	G	0.2407	0.0157	0.0639	0.0583	FALSE	FALSE	FALSE	5mqf6e	0.1101	0.8867	outcome	TRUE	reported	textfile	1	17595034	3657	0.05062	2.061e-06	1747	TRUE	reported	nRGisY	0.0639	2	TRUE	6021	0.00614478	22.598	0.000253425
rs6496328	T	C	T	C	-0.2998	0.0946	0.0387	0.1236	FALSE	FALSE	FALSE	5mqf6e	0.0751	0.2077	outcome	TRUE	reported	textfile	15	86988686	3657	0.06337	2.315e-06	1747	TRUE	reported	nRGisY	0.0387	2	TRUE	6021	0.00608304	22.3696	0.0031437
rs842631	T	C	T	C	0.1195	0.0638	0.4912	0.4504	FALSE	FALSE	FALSE	5mqf6e	0.0494	0.1964	outcome	TRUE	reported	textfile	2	61085723	3657	0.02528	2.387e-06	1747	TRUE	reported	nRGisY	0.4912	2	TRUE	6021	0.00607311	22.3328	0.003382
rs11059642	A	G	A	G	0.1427	-0.0048	0.201	0.2941	FALSE	FALSE	FALSE	5mqf6e	0.0542	0.9301	outcome	TRUE	reported	textfile	12	128795644	3657	0.03038	2.738e-06	1747	TRUE	reported	nRGisY	0.201	2	TRUE	6021	0.00599702	22.0513	0.000265854
rs11051833	T	C	T	C	-0.3439	0.134	0.0286	0.0813	FALSE	FALSE	FALSE	5mqf6e	0.0918	0.1445	outcome	TRUE	reported	textfile	12	32330242	3657	0.07379	3.278e-06	1747	TRUE	reported	nRGisY	0.0286	2	TRUE	6021	0.00590436	21.7086	0.00551974
rs73245560	C	T	C	T	0.4287	-0.0737	0.0182	0.0348	FALSE	FALSE	FALSE	5mqf6e	0.1467	0.6154	outcome	TRUE	reported	textfile	4	43987474	3657	0.09254	3.743e-06	1747	TRUE	reported	nRGisY	0.0182	2	TRUE	6021	0.00583421	21.4492	0.000833665
rs8025257	C	T	C	T	-0.1349	-0.019	0.2286	0.1849	FALSE	FALSE	FALSE	5mqf6e	0.0634	0.7645	outcome	TRUE	reported	textfile	15	89600226	3657	0.02937	4.501e-06	1747	TRUE	reported	nRGisY	0.2286	2	TRUE	6021	0.00573578	21.0852	0.000592756
rs80155794	A	G	A	G	-0.3388	0.0556	0.0267	0.0686	FALSE	FALSE	FALSE	5mqf6e	0.101	0.5819	outcome	TRUE	reported	textfile	5	178957291	3657	0.07403	4.883e-06	1747	TRUE	reported	nRGisY	0.0267	2	TRUE	6021	0.00569464	20.9331	0.00108422
rs56132967	T	G	T	G	-0.3532	-0.0099	0.0258	0.0639	FALSE	FALSE	FALSE	5mqf6e	0.105	0.9253	outcome	TRUE	reported	textfile	14	61644977	3657	0.07788	5.923e-06	1747	TRUE	reported	nRGisY	0.0258	2	TRUE	6021	0.00559279	20.5566	0.000438799
rs6443362	T	C	T	C	0.1113	0.0029	0.4837	0.4695	FALSE	FALSE	FALSE	5mqf6e	0.0494	0.9526	outcome	TRUE	reported	textfile	3	176369881	3657	0.02461	6.285e-06	1747	TRUE	reported	nRGisY	0.4837	2	TRUE	6021	0.00556186	20.4423	0.000419486
rs73086355	A	C	A	C	-0.2701	0.031	0.0432	0.0654	FALSE	FALSE	FALSE	5mqf6e	0.1042	0.7659	outcome	TRUE	reported	textfile	20	11850850	3657	0.06014	7.318e-06	1747	TRUE	reported	nRGisY	0.0432	2	TRUE	6021	0.0054854	20.1597	0.000790564
rs12771377	G	A	G	A	0.2859	-0.0378	0.0383	0.0854	FALSE	FALSE	FALSE	5mqf6e	0.0907	0.6765	outcome	TRUE	reported	textfile	10	22717779	3657	0.06402	8.229e-06	1747	TRUE	reported	nRGisY	0.0383	2	TRUE	6021	0.00542388	19.9324	0.00110313
rs30003	C	T	C	T	-0.1948	-0.0931	0.2303	0.2531	FALSE	FALSE	FALSE	CDnDen	0.0555	0.09326	outcome	TRUE	reported	textfile	19	49846398	3645	0.02926	3.222e-11	1748	TRUE	reported	YIB92r	0.2303	2	TRUE	6021	0.0120139	44.2987	2.51335e-05
rs12554596	G	A	G	A	-0.1558	0.0314	0.3892	0.2119	FALSE	FALSE	FALSE	CDnDen	0.0632	0.6186	outcome	TRUE	reported	textfile	9	37002142	3645	0.02531	8.426e-10	1748	TRUE	reported	YIB92r	0.3892	2	TRUE	6021	0.0102887	37.8715	5.50577e-06
rs2066399	A	G	A	G	0.187	-0.0556	0.1789	0.8306	FALSE	FALSE	FALSE	CDnDen	0.0651	0.3929	outcome	TRUE	reported	textfile	6	15880540	3645	0.03209	6.08e-09	1748	TRUE	reported	YIB92r	0.1789	2	TRUE	6021	0.00923037	33.9395	4.75447e-05
rs2356414	T	C	T	C	0.1727	0.0294	0.1894	0.6957	FALSE	FALSE	FALSE	CDnDen	0.0537	0.5841	outcome	TRUE	reported	textfile	16	71378301	3645	0.03199	7.154e-08	1748	TRUE	reported	YIB92r	0.1894	2	TRUE	6021	0.00793232	29.1285	8.90429e-05
rs7216991	A	G	A	G	-0.1331	-0.119	0.2775	0.4692	FALSE	FALSE	FALSE	CDnDen	0.0488	0.01469	outcome	TRUE	reported	textfile	17	45052253	3645	0.0277	1.598e-06	1748	TRUE	reported	YIB92r	0.2775	2	TRUE	6021	0.00629444	23.0759	0.021955
rs75097128	G	A	G	A	-0.4553	0.1558	0.0162	0.0456	FALSE	FALSE	FALSE	CDnDen	0.1192	0.191	outcome	TRUE	reported	textfile	4	113292746	3645	0.095	1.715e-06	1748	TRUE	reported	YIB92r	0.0162	2	TRUE	6021	0.00626213	22.9567	0.00292173
rs17380682	T	C	T	C	0.2155	0.1822	0.0798	0.0462	FALSE	FALSE	FALSE	CDnDen	0.1272	0.1521	outcome	TRUE	reported	textfile	1	164447415	3645	0.04521	1.947e-06	1748	TRUE	reported	YIB92r	0.0798	2	TRUE	6021	0.00619483	22.7084	0.00399614
rs61651267	G	A	G	A	0.1246	-0.0748	0.3321	0.4335	FALSE	FALSE	FALSE	CDnDen	0.0512	0.1437	outcome	TRUE	reported	textfile	5	143495021	3645	0.02636	2.381e-06	1748	TRUE	reported	YIB92r	0.3321	2	TRUE	6021	0.00609247	22.3309	0.00466003
rs7036970	G	A	G	A	-0.2227	0.0094	0.0713	0.1111	FALSE	FALSE	FALSE	CDnDen	0.0786	0.9053	outcome	TRUE	reported	textfile	9	3182850	3645	0.04764	3.063e-06	1748	TRUE	reported	YIB92r	0.0713	2	TRUE	6021	0.00595941	21.8403	0.00030379
rs4474350	C	A	C	A	-0.1413	0.069	0.2022	0.1744	FALSE	FALSE	FALSE	CDnDen	0.0658	0.2941	outcome	TRUE	reported	textfile	10	26837236	3645	0.03042	3.523e-06	1748	TRUE	reported	YIB92r	0.2022	2	TRUE	6021	0.00588444	21.5639	0.00254182
rs11135082	G	A	G	A	0.2303	-0.0822	0.0657	0.0607	FALSE	FALSE	FALSE	CDnDen	0.12	0.4933	outcome	TRUE	reported	textfile	5	159137396	3645	0.04967	3.656e-06	1748	TRUE	reported	YIB92r	0.0657	2	TRUE	6021	0.00586338	21.4863	0.00121652
rs149514748	T	C	T	C	0.5269	0.1007	0.0107	0.0217	FALSE	FALSE	FALSE	CDnDen	0.1849	0.5859	outcome	TRUE	reported	textfile	9	118323116	3645	0.1176	7.654e-06	1748	TRUE	reported	YIB92r	0.0107	2	TRUE	6021	0.0054772	20.0633	0.00138252
rs116412485	A	C	A	C	-0.2992	0.1812	0.0339	0.045	FALSE	FALSE	FALSE	CDnDen	0.1178	0.1239	outcome	TRUE	reported	textfile	1	40040949	3645	0.06701	8.245e-06	1748	TRUE	reported	YIB92r	0.0339	2	TRUE	6021	0.00543973	19.9253	0.00999048
rs2114442	T	C	T	C	0.1112	0.0468	0.4247	0.4386	FALSE	FALSE	FALSE	CDnDen	0.0493	0.3421	outcome	TRUE	reported	textfile	4	100832060	3645	0.02496	8.599e-06	1748	TRUE	reported	YIB92r	0.4247	2	TRUE	6021	0.00541582	19.8373	0.00339061
rs142291033	A	G	A	G	0.2797	-0.1313	0.0387	0.0172	FALSE	FALSE	FALSE	CDnDen	0.2228	0.5556	outcome	TRUE	reported	textfile	1	56196958	3645	0.0629	8.99e-06	1748	TRUE	reported	YIB92r	0.0387	2	TRUE	6021	0.00539556	19.7627	0.0016648
rs74054746	G	A	G	A	-0.347	0.0033	0.0251	0.0655	FALSE	FALSE	FALSE	CDnDen	0.1027	0.9743	outcome	TRUE	reported	textfile	14	61638400	3645	0.07804	8.993e-06	1748	TRUE	reported	YIB92r	0.0251	2	TRUE	6021	0.00539483	19.76	0.000490008
rs143959146	A	G	A	G	0.2878	-0.0303	0.039	0.0696	FALSE	FALSE	FALSE	CDnDen	0.1024	0.7676	outcome	TRUE	reported	textfile	9	33898132	3645	0.06477	9.138e-06	1748	TRUE	reported	YIB92r	0.039	2	TRUE	6021	0.00538754	19.7331	0.000894266
rs76029468	G	T	G	T	0.2057	0.0614	0.076	0.0669	FALSE	FALSE	FALSE	CDnDen	0.1044	0.5563	outcome	TRUE	reported	textfile	5	161525053	3645	0.04647	9.859e-06	1748	TRUE	reported	YIB92r	0.076	2	TRUE	6021	0.00534684	19.5833	0.0017533
rs4270172	A	G	A	G	-0.2012	-0.0208	0.256	0.7236	FALSE	FALSE	FALSE	H8isnB	0.0549	0.7053	outcome	TRUE	reported	textfile	16	55157679	1834	0.03904	2.836e-07	1749	TRUE	reported	WNMw4H	0.256	2	TRUE	6021	0.0142755	26.5315	1.57685e-05
rs2066399	A	G	A	G	0.2252	-0.0556	0.1756	0.8306	FALSE	FALSE	FALSE	H8isnB	0.0651	0.3929	outcome	TRUE	reported	textfile	6	15880540	1834	0.04528	7.224e-07	1749	TRUE	reported	WNMw4H	0.1756	2	TRUE	6021	0.0133078	24.7087	8.44048e-05
rs115329330	C	G	C	G	-0.649	-0.1234	0.0188	0.126	FALSE	TRUE	FALSE	H8isnB	0.0769	0.1084	outcome	TRUE	reported	textfile	21	27574452	1834	0.1347	1.578e-06	1749	TRUE	reported	WNMw4H	0.0188	2	TRUE	6021	0.0124995	23.1889	0.000594883
rs9808998	C	T	C	T	0.1621	-0.0249	0.3997	0.3997	FALSE	FALSE	FALSE	H8isnB	0.0504	0.6212	outcome	TRUE	reported	textfile	3	176405898	1834	0.03481	3.442e-06	1749	TRUE	reported	WNMw4H	0.3997	2	TRUE	6021	0.0116857	21.6613	0.000128234
rs111741301	C	G	C	G	0.3444	0.0003	0.0592	0.0468	FALSE	TRUE	FALSE	H8isnB	0.125	0.9979	outcome	TRUE	reported	textfile	13	71781323	1834	0.07403	3.52e-06	1749	TRUE	reported	WNMw4H	0.0592	2	TRUE	6021	0.0116632	21.6191	4.83807e-05
rs13061533	T	C	T	C	0.2044	0.0571	0.181	0.1688	FALSE	FALSE	FALSE	H8isnB	0.0684	0.4041	outcome	TRUE	reported	textfile	3	188611158	1834	0.04395	3.543e-06	1749	TRUE	reported	WNMw4H	0.181	2	TRUE	6021	0.0116561	21.6058	0.000252141
rs12470912	A	G	A	G	0.2166	-0.0925	0.1598	0.1549	FALSE	FALSE	FALSE	H8isnB	0.0686	0.1776	outcome	TRUE	reported	textfile	2	168748110	1834	0.04663	3.647e-06	1749	TRUE	reported	WNMw4H	0.1598	2	TRUE	6021	0.0116281	21.5532	0.000656498
rs1495924	G	T	G	T	-0.1614	0.047	0.3978	0.2887	FALSE	FALSE	FALSE	H8isnB	0.0564	0.4044	outcome	TRUE	reported	textfile	2	241183284	1834	0.03478	3.718e-06	1749	TRUE	reported	WNMw4H	0.3978	2	TRUE	6021	0.0116059	21.5117	0.000260251
rs138448626	T	C	T	C	-0.2856	0.043	0.0823	0.0565	FALSE	FALSE	FALSE	H8isnB	0.1149	0.7083	outcome	TRUE	reported	textfile	1	24084235	1834	0.06212	4.554e-06	1749	TRUE	reported	WNMw4H	0.0823	2	TRUE	6021	0.011394	21.1144	0.000124951
rs73810453	T	A	T	A	0.3559	-0.1418	0.0488	0.0406	FALSE	TRUE	FALSE	H8isnB	0.1299	0.2748	outcome	TRUE	reported	textfile	4	41994707	1834	0.07745	4.623e-06	1749	TRUE	reported	WNMw4H	0.0488	2	TRUE	6021	0.0113826	21.093	0.000487123
rs11920066	C	T	C	T	0.3359	0.1469	0.0575	0.0698	FALSE	FALSE	FALSE	H8isnB	0.0966	0.1285	outcome	TRUE	reported	textfile	3	88803979	1834	0.07368	5.467e-06	1749	TRUE	reported	WNMw4H	0.0575	2	TRUE	6021	0.0112054	20.7609	0.00115842
rs3959642	G	A	G	A	-0.1656	0.0817	0.3299	0.7195	FALSE	FALSE	FALSE	H8isnB	0.0557	0.1423	outcome	TRUE	reported	textfile	22	39860589	1834	0.03639	5.66e-06	1749	TRUE	reported	WNMw4H	0.3299	2	TRUE	6021	0.0111656	20.6863	0.0010838
rs17613271	G	A	G	A	-0.2258	-0.0283	0.4411	0.535	FALSE	FALSE	FALSE	H8isnB	0.0511	0.5789	outcome	TRUE	reported	textfile	6	32621778	1834	0.05036	7.752e-06	1749	TRUE	reported	WNMw4H	0.4411	2	TRUE	6021	0.0108428	20.0818	0.000261848
rs11199370	A	G	A	G	0.2497	0.078	0.0998	0.0931	FALSE	FALSE	FALSE	H8isnB	0.0875	0.3726	outcome	TRUE	reported	textfile	10	122262398	1834	0.05583	8.193e-06	1749	TRUE	reported	WNMw4H	0.0998	2	TRUE	6021	0.0107893	19.9815	0.00050596
rs141950809	T	C	T	C	0.2965	-0.043	0.0676	0.0764	FALSE	FALSE	FALSE	H8isnB	0.0963	0.6549	outcome	TRUE	reported	textfile	13	93405148	1834	0.06636	8.368e-06	1749	TRUE	reported	WNMw4H	0.0676	2	TRUE	6021	0.010768	19.9417	0.000225524
rs189077909	A	G	A	G	-0.6429	-0.0011	0.0134	0.0191	FALSE	FALSE	FALSE	H8isnB	0.2495	0.9965	outcome	TRUE	reported	textfile	4	57626079	1834	0.1447	9.449e-06	1749	TRUE	reported	WNMw4H	0.0134	2	TRUE	6021	0.0106488	19.7186	0.000104347
rs143959146	A	G	A	G	0.4165	-0.0303	0.0354	0.0696	FALSE	FALSE	FALSE	H8isnB	0.1024	0.7676	outcome	TRUE	reported	textfile	9	33898132	1834	0.09377	9.449e-06	1749	TRUE	reported	WNMw4H	0.0354	2	TRUE	6021	0.0106428	19.7074	0.000185212
rs76029565	G	A	G	A	-0.2138	-0.0948	0.2288	0.2521	FALSE	FALSE	FALSE	GjnDen	0.0556	0.08791	outcome	TRUE	reported	textfile	19	49887709	1836	0.04046	1.418e-07	1750	TRUE	reported	pjpI9V	0.2288	2	TRUE	6021	0.0149808	27.8927	0.000150779
rs760958	C	T	C	T	0.264	0.0738	0.1258	0.9168	FALSE	FALSE	FALSE	GjnDen	0.0897	0.4105	outcome	TRUE	reported	textfile	6	15899354	1836	0.05162	3.497e-07	1750	TRUE	reported	pjpI9V	0.1258	2	TRUE	6021	0.0140461	26.1275	4.73474e-05
rs2220549	A	G	A	G	-0.223	0.0011	0.165	0.2167	FALSE	FALSE	FALSE	GjnDen	0.0597	0.9858	outcome	TRUE	reported	textfile	3	21756408	1836	0.04528	9.194e-07	1750	TRUE	reported	pjpI9V	0.165	2	TRUE	6021	0.0130384	24.2283	1.76823e-05
rs11230344	A	G	A	G	-0.165	0.0294	0.3903	0.5438	FALSE	FALSE	FALSE	GjnDen	0.0494	0.5525	outcome	TRUE	reported	textfile	11	60264409	1836	0.03378	1.126e-06	1750	TRUE	reported	pjpI9V	0.3903	2	TRUE	6021	0.0128283	23.8328	6.93304e-05
rs12898020	G	A	G	A	0.16	-0.0518	0.4984	0.4177	FALSE	FALSE	FALSE	GjnDen	0.05	0.3001	outcome	TRUE	reported	textfile	14	90835752	1836	0.03318	1.545e-06	1750	TRUE	reported	pjpI9V	0.4984	2	TRUE	6021	0.0125069	23.2281	0.000206162
rs7598607	G	A	G	A	0.3217	-0.0354	0.0714	0.0499	FALSE	FALSE	FALSE	GjnDen	0.1292	0.7844	outcome	TRUE	reported	textfile	2	129870972	1836	0.0675	2.031e-06	1750	TRUE	reported	pjpI9V	0.0714	2	TRUE	6021	0.0122203	22.6893	5.56444e-05
rs1545973	G	A	G	A	0.175	-0.0433	0.3135	0.3626	FALSE	FALSE	FALSE	GjnDen	0.051	0.3959	outcome	TRUE	reported	textfile	4	141622371	1836	0.03701	2.43e-06	1750	TRUE	reported	pjpI9V	0.3135	2	TRUE	6021	0.0120312	22.3339	0.000199111
rs68171708	T	C	T	C	0.1755	0.0083	0.2982	0.3906	FALSE	FALSE	FALSE	GjnDen	0.0508	0.8698	outcome	TRUE	reported	textfile	3	142855504	1836	0.03729	2.712e-06	1750	TRUE	reported	pjpI9V	0.2982	2	TRUE	6021	0.0119203	22.1257	5.52631e-05
rs7179991	G	A	G	A	-0.3159	-0.002	0.0662	0.0747	FALSE	FALSE	FALSE	GjnDen	0.0975	0.984	outcome	TRUE	reported	textfile	15	31811797	1836	0.0676	3.19e-06	1750	TRUE	reported	pjpI9V	0.0662	2	TRUE	6021	0.0117543	21.8139	4.65614e-05
rs79741907	C	T	C	T	0.2845	-0.0202	0.0847	0.0432	FALSE	FALSE	FALSE	GjnDen	0.1309	0.8771	outcome	TRUE	reported	textfile	14	94877494	1836	0.06107	3.422e-06	1750	TRUE	reported	pjpI9V	0.0847	2	TRUE	6021	0.0116824	21.6788	6.46957e-05
rs11742841	G	A	G	A	0.3177	0.1601	0.0643	0.0664	FALSE	FALSE	FALSE	GjnDen	0.1002	0.1099	outcome	TRUE	reported	textfile	5	108992703	1836	0.06851	3.786e-06	1750	TRUE	reported	pjpI9V	0.0643	2	TRUE	6021	0.011577	21.4809	0.00104145
rs76078276	C	G	C	G	0.2051	-0.1223	0.1751	0.1471	FALSE	TRUE	FALSE	GjnDen	0.071	0.08504	outcome	TRUE	reported	textfile	3	187802062	1836	0.04467	4.715e-06	1750	TRUE	reported	pjpI9V	0.1751	2	TRUE	6021	0.0113519	21.0584	0.00147809
rs1972795	T	C	T	C	0.1618	-0.0155	0.3162	0.1965	FALSE	FALSE	FALSE	GjnDen	0.0619	0.8018	outcome	TRUE	reported	textfile	12	95289170	1836	0.03626	8.653e-06	1750	TRUE	reported	pjpI9V	0.3162	2	TRUE	6021	0.0107286	19.8897	0.00015831
rs62366714	G	T	G	T	0.2239	-0.0978	0.1332	0.1713	FALSE	FALSE	FALSE	GjnDen	0.0669	0.144	outcome	TRUE	reported	textfile	5	105199555	1836	0.05019	8.671e-06	1750	TRUE	reported	pjpI9V	0.1332	2	TRUE	6021	0.0107231	19.8793	0.00141608
rs2481929	G	T	G	T	-0.2201	-0.0713	0.1318	0.2298	FALSE	FALSE	FALSE	GjnDen	0.0595	0.2309	outcome	TRUE	reported	textfile	1	24807579	1836	0.04939	8.887e-06	1750	TRUE	reported	pjpI9V	0.1318	2	TRUE	6021	0.0107008	19.8376	0.000917738
rs73205632	C	T	C	T	-0.5144	-0.0511	0.0218	0.07	FALSE	FALSE	FALSE	GjnDen	0.1033	0.621	outcome	TRUE	reported	textfile	21	35291153	1836	0.1155	8.957e-06	1750	TRUE	reported	pjpI9V	0.0218	2	TRUE	6021	0.0106881	19.8137	0.000259997
rs2066399	A	G	A	G	0.3353	-0.0556	0.179	0.8306	FALSE	FALSE	FALSE	6NqydS	0.0651	0.3929	outcome	TRUE	reported	textfile	6	15880540	3657	0.03177	1.131e-25	1751	TRUE	reported	00HisQ	0.179	2	TRUE	6021	0.0295581	111.326	8.67875e-15
rs7939177	T	C	T	C	-0.1785	0.0148	0.3898	0.5398	FALSE	FALSE	FALSE	6NqydS	0.0492	0.7632	outcome	TRUE	reported	textfile	11	60266070	3657	0.02475	6.727e-13	1751	TRUE	reported	00HisQ	0.3898	2	TRUE	6021	0.0140239	51.9862	4.02224e-08
rs34486765	A	G	A	G	0.1684	0.0683	0.3094	0.2026	FALSE	FALSE	FALSE	6NqydS	0.0633	0.2806	outcome	TRUE	reported	textfile	19	49915911	3657	0.02631	1.751e-10	1751	TRUE	reported	00HisQ	0.3094	2	TRUE	6021	0.0110785	40.9454	1.2109e-05
rs72836542	T	C	T	C	0.1494	-0.0435	0.3161	0.2874	FALSE	FALSE	FALSE	6NqydS	0.0541	0.4209	outcome	TRUE	reported	textfile	6	14091682	3657	0.02674	2.45e-08	1751	TRUE	reported	00HisQ	0.3161	2	TRUE	6021	0.00846373	31.199	9.37884e-05
rs233493	A	G	A	G	-0.1252	0.011	0.3661	0.6068	FALSE	FALSE	FALSE	6NqydS	0.0513	0.8306	outcome	TRUE	reported	textfile	6	14804334	3657	0.02554	9.822e-07	1751	TRUE	reported	00HisQ	0.3661	2	TRUE	6021	0.00652826	24.0176	0.000191283
rs139106	A	G	A	G	-0.194	0.0183	0.1043	0.1195	FALSE	FALSE	FALSE	6NqydS	0.0794	0.818	outcome	TRUE	reported	textfile	22	44569390	3657	0.0397	1.067e-06	1751	TRUE	reported	00HisQ	0.1043	2	TRUE	6021	0.0064874	23.8663	0.000208708
rs73175579	A	C	A	C	0.288	0.0856	0.0435	0.0373	FALSE	FALSE	FALSE	6NqydS	0.1428	0.5489	outcome	TRUE	reported	textfile	3	185524179	3657	0.05989	1.58e-06	1751	TRUE	reported	00HisQ	0.0435	2	TRUE	6021	0.00628368	23.1121	0.000625552
rs10965813	G	C	G	C	0.1822	-0.1805	0.111	0.1701	FALSE	TRUE	FALSE	6NqydS	0.0678	0.007776	outcome	TRUE	reported	textfile	9	23378556	3657	0.03837	2.121e-06	1751	TRUE	reported	00HisQ	0.111	2	TRUE	6021	0.006128	22.5359	0.0352573
rs116393510	T	C	T	C	-0.3197	-0.0715	0.0328	0.0539	FALSE	FALSE	FALSE	6NqydS	0.1178	0.544	outcome	TRUE	reported	textfile	2	200547937	3657	0.06762	2.356e-06	1751	TRUE	reported	00HisQ	0.0328	2	TRUE	6021	0.00607524	22.3407	0.000802194
rs7307681	T	C	T	C	0.1407	0.081	0.2186	0.2181	FALSE	FALSE	FALSE	6NqydS	0.0604	0.1797	outcome	TRUE	reported	textfile	12	55336327	3657	0.02976	2.361e-06	1751	TRUE	reported	00HisQ	0.2186	2	TRUE	6021	0.00607507	22.3401	0.00372157
rs146797770	C	T	C	T	0.4285	0.5303	0.0179	0.0162	FALSE	FALSE	FALSE	6NqydS	0.3065	0.08362	outcome	TRUE	reported	textfile	17	6772746	3657	0.0922	3.476e-06	1751	TRUE	reported	00HisQ	0.0179	2	TRUE	6021	0.00587161	21.5875	0.00936089
rs5750823	T	C	T	C	-0.1167	0.0544	0.3775	0.7116	FALSE	FALSE	FALSE	6NqydS	0.0548	0.3207	outcome	TRUE	reported	textfile	22	39829973	3657	0.02524	3.916e-06	1751	TRUE	reported	00HisQ	0.3775	2	TRUE	6021	0.00581175	21.3661	0.00242154
rs616645	G	T	G	T	0.1697	0.0412	0.128	0.2076	FALSE	FALSE	FALSE	6NqydS	0.0614	0.5028	outcome	TRUE	reported	textfile	1	12240824	3657	0.03688	4.356e-06	1751	TRUE	reported	00HisQ	0.128	2	TRUE	6021	0.00575638	21.1614	0.00131258
rs234630	C	T	C	T	0.1293	0.0062	0.2484	0.284	FALSE	FALSE	FALSE	6NqydS	0.0543	0.9098	outcome	TRUE	reported	textfile	20	57483655	3657	0.02817	4.545e-06	1751	TRUE	reported	00HisQ	0.2484	2	TRUE	6021	0.00572801	21.0565	0.000390454
rs2136235	A	C	A	C	-0.1698	0.0077	0.1278	0.1287	FALSE	FALSE	FALSE	6NqydS	0.0736	0.917	outcome	TRUE	reported	textfile	3	183075828	3657	0.03703	4.652e-06	1751	TRUE	reported	00HisQ	0.1278	2	TRUE	6021	0.0057168	21.015	0.000387026
rs56031692	G	T	G	T	0.1233	0.0421	0.2976	0.214	FALSE	FALSE	FALSE	6NqydS	0.0592	0.4768	outcome	TRUE	reported	textfile	1	58879185	3657	0.02702	5.169e-06	1751	TRUE	reported	00HisQ	0.2976	2	TRUE	6021	0.00566193	20.8122	0.00158548
rs532803692	C	A	C	A	-0.3518	-0.0066	0.0265	0.0731	FALSE	FALSE	FALSE	6NqydS	0.1037	0.9496	outcome	TRUE	reported	textfile	16	20477419	3657	0.07807	6.808e-06	1751	TRUE	reported	00HisQ	0.0265	2	TRUE	6021	0.00552196	20.2948	0.000445378
rs1313625	A	G	A	G	-0.28	0.1841	0.0388	0.0328	FALSE	FALSE	FALSE	6NqydS	0.164	0.2616	outcome	TRUE	reported	textfile	5	22458923	3657	0.06277	8.404e-06	1751	TRUE	reported	00HisQ	0.0388	2	TRUE	6021	0.00541166	19.8872	0.00472705
rs150896136	A	G	A	G	0.3123	0.1706	0.0306	0.0283	FALSE	FALSE	FALSE	6NqydS	0.171	0.3185	outcome	TRUE	reported	textfile	7	68325252	3657	0.07013	8.719e-06	1751	TRUE	reported	00HisQ	0.0306	2	TRUE	6021	0.0053934	19.8198	0.0037811
rs4939384	G	A	G	A	-0.236	0.0184	0.3912	0.5405	FALSE	FALSE	FALSE	MhCxnM	0.0494	0.7088	outcome	TRUE	reported	textfile	11	60273642	3657	0.02474	2.504e-21	1752	TRUE	reported	tlDtu7	0.3912	2	TRUE	6021	0.0242787	90.9467	3.76574e-13
rs2066399	A	G	A	G	0.2375	-0.0556	0.179	0.8306	FALSE	FALSE	FALSE	MhCxnM	0.0651	0.3929	outcome	TRUE	reported	textfile	6	15880540	3657	0.03213	1.752e-13	1752	TRUE	reported	tlDtu7	0.179	2	TRUE	6021	0.0147211	54.6095	1.21931e-07
rs72836542	T	C	T	C	0.1752	-0.0435	0.3161	0.2874	FALSE	FALSE	FALSE	MhCxnM	0.0541	0.4209	outcome	TRUE	reported	textfile	6	14091682	3657	0.0268	7.198e-11	1752	TRUE	reported	tlDtu7	0.3161	2	TRUE	6021	0.0115512	42.7131	3.29087e-06
rs34486765	A	G	A	G	0.167	0.0683	0.3094	0.2026	FALSE	FALSE	FALSE	MhCxnM	0.0633	0.2806	outcome	TRUE	reported	textfile	19	49915911	3657	0.02642	2.895e-10	1752	TRUE	reported	tlDtu7	0.3094	2	TRUE	6021	0.0108074	39.9328	1.60945e-05
rs1007337	T	C	T	C	-0.1389	0.0102	0.3976	0.6592	FALSE	FALSE	FALSE	MhCxnM	0.0521	0.8452	outcome	TRUE	reported	textfile	22	39781585	3657	0.02509	3.335e-08	1752	TRUE	reported	tlDtu7	0.3976	2	TRUE	6021	0.00831101	30.6313	2.23657e-05
rs7404890	A	G	A	G	0.1788	0.0034	0.1792	0.7608	FALSE	FALSE	FALSE	MhCxnM	0.0592	0.9544	outcome	TRUE	reported	textfile	16	11007193	3657	0.03256	4.229e-08	1752	TRUE	reported	tlDtu7	0.1792	2	TRUE	6021	0.00817852	30.139	1.78831e-05
rs388354	C	A	C	A	-0.1329	-0.0534	0.4795	0.6045	FALSE	FALSE	FALSE	MhCxnM	0.0503	0.2879	outcome	TRUE	reported	textfile	7	40190449	3657	0.02439	5.391e-08	1752	TRUE	reported	tlDtu7	0.4795	2	TRUE	6021	0.00805359	29.6749	0.000273373
rs73154503	C	T	C	T	-0.2133	-0.0562	0.0886	0.0631	FALSE	FALSE	FALSE	MhCxnM	0.1172	0.6312	outcome	TRUE	reported	textfile	3	159871677	3657	0.04326	8.549e-07	1752	TRUE	reported	tlDtu7	0.0886	2	TRUE	6021	0.00660399	24.298	0.000330974
rs233493	A	G	A	G	-0.1263	0.011	0.3661	0.6068	FALSE	FALSE	FALSE	MhCxnM	0.0513	0.8306	outcome	TRUE	reported	textfile	6	14804334	3657	0.02563	8.648e-07	1752	TRUE	reported	tlDtu7	0.3661	2	TRUE	6021	0.00659645	24.2701	0.000176506
rs61731791	T	C	T	C	0.2071	-0.1812	0.0972	0.0363	FALSE	FALSE	FALSE	MhCxnM	0.1374	0.1873	outcome	TRUE	reported	textfile	19	50940778	3657	0.04225	9.99e-07	1752	TRUE	reported	tlDtu7	0.0972	2	TRUE	6021	0.00652736	24.0143	0.00227852
rs77612075	T	C	T	C	0.3469	-0.0087	0.0293	0.0492	FALSE	FALSE	FALSE	MhCxnM	0.1212	0.9428	outcome	TRUE	reported	textfile	5	162820460	3657	0.07169	1.36e-06	1752	TRUE	reported	tlDtu7	0.0293	2	TRUE	6021	0.00636201	23.402	0.000164414
rs73086355	A	C	A	C	-0.2878	0.031	0.0432	0.0654	FALSE	FALSE	FALSE	MhCxnM	0.1042	0.7659	outcome	TRUE	reported	textfile	20	11850850	3657	0.06009	1.739e-06	1752	TRUE	reported	tlDtu7	0.0432	2	TRUE	6021	0.00623357	22.9266	0.000329853
rs12042193	G	A	G	A	-0.1223	-0.0253	0.3687	0.5308	FALSE	FALSE	FALSE	MhCxnM	0.0529	0.6329	outcome	TRUE	reported	textfile	1	116031657	3657	0.02571	2.054e-06	1752	TRUE	reported	tlDtu7	0.3687	2	TRUE	6021	0.00614957	22.6158	0.000552449
rs55643835	T	C	T	C	-0.2506	-0.0428	0.0567	0.0854	FALSE	FALSE	FALSE	MhCxnM	0.0912	0.6389	outcome	TRUE	reported	textfile	6	33947909	3657	0.05406	3.7e-06	1752	TRUE	reported	tlDtu7	0.0567	2	TRUE	6021	0.00584172	21.4769	0.000768044
rs11230624	C	G	C	G	-0.1726	-0.133	0.1263	0.0894	FALSE	TRUE	FALSE	MhCxnM	0.0978	0.1738	outcome	TRUE	reported	textfile	11	60952231	3657	0.03735	3.944e-06	1752	TRUE	reported	tlDtu7	0.1263	2	TRUE	6021	0.00580559	21.3434	0.00502579
rs76355582	C	G	C	G	0.2445	-0.1092	0.0551	0.0288	FALSE	TRUE	FALSE	MhCxnM	0.1533	0.4761	outcome	TRUE	reported	textfile	7	119197741	3657	0.05325	4.539e-06	1752	TRUE	reported	tlDtu7	0.0551	2	TRUE	6021	0.00573188	21.0708	0.00147241
rs113371046	A	G	A	G	0.2316	0.0157	0.0639	0.0583	FALSE	FALSE	FALSE	MhCxnM	0.1101	0.8867	outcome	TRUE	reported	textfile	1	17595034	3657	0.05055	4.76e-06	1752	TRUE	reported	tlDtu7	0.0639	2	TRUE	6021	0.00570721	20.9796	0.000427671
rs1306395	C	T	C	T	0.1157	0.0638	0.4855	0.4522	FALSE	FALSE	FALSE	MhCxnM	0.0495	0.1972	outcome	TRUE	reported	textfile	2	61076272	3657	0.02527	4.874e-06	1752	TRUE	reported	tlDtu7	0.4855	2	TRUE	6021	0.00569966	20.9517	0.00486979
rs8025257	C	T	C	T	-0.1337	-0.019	0.2286	0.1849	FALSE	FALSE	FALSE	MhCxnM	0.0634	0.7645	outcome	TRUE	reported	textfile	15	89600226	3657	0.02934	5.403e-06	1752	TRUE	reported	tlDtu7	0.2286	2	TRUE	6021	0.00564623	20.7542	0.000658171
rs17616173	G	A	G	A	-0.2744	0.0766	0.0438	0.1207	FALSE	FALSE	FALSE	MhCxnM	0.0764	0.3159	outcome	TRUE	reported	textfile	15	86986287	3657	0.06027	5.44e-06	1752	TRUE	reported	tlDtu7	0.0438	2	TRUE	6021	0.0056362	20.7171	0.00296611
rs187747283	G	T	G	T	-0.165	0.1314	0.1374	0.0245	FALSE	FALSE	FALSE	MhCxnM	0.2232	0.556	outcome	TRUE	reported	textfile	5	56487565	3657	0.03641	6.061e-06	1752	TRUE	reported	tlDtu7	0.1374	2	TRUE	6021	0.00558431	20.5253	0.00133203
rs12120358	T	A	T	A	-0.133	0.0052	0.2234	0.3715	FALSE	TRUE	FALSE	MhCxnM	0.0525	0.9217	outcome	TRUE	reported	textfile	1	161444369	3657	0.02962	7.298e-06	1752	TRUE	reported	tlDtu7	0.2234	2	TRUE	6021	0.00548303	20.151	0.000506531
rs12282477	A	T	A	T	-0.2837	-0.0276	0.0383	0.0772	FALSE	TRUE	FALSE	MhCxnM	0.0942	0.7696	outcome	TRUE	reported	textfile	11	90976338	3657	0.06407	9.782e-06	1752	TRUE	reported	tlDtu7	0.0383	2	TRUE	6021	0.00533288	19.5962	0.000935879
rs11242780	C	G	C	G	0.1768	0.0307	0.105	0.207	FALSE	TRUE	FALSE	MhCxnM	0.0696	0.6592	outcome	TRUE	reported	textfile	6	2511559	3657	0.03993	9.755e-06	1752	TRUE	reported	tlDtu7	0.105	2	TRUE	6021	0.00533235	19.5942	0.00129118
rs30006	C	T	C	T	-0.196	-0.0931	0.2335	0.2553	FALSE	FALSE	FALSE	HHCUlr	0.0554	0.09306	outcome	TRUE	reported	textfile	19	49847916	3657	0.02941	3.027e-11	1753	TRUE	reported	Uuhsrj	0.2335	2	TRUE	6021	0.0119993	44.3899	2.52188e-05
rs35567463	A	C	A	C	0.1709	-0.0018	0.3506	0.1709	FALSE	FALSE	FALSE	HHCUlr	0.0678	0.9784	outcome	TRUE	reported	textfile	6	32633970	3657	0.02875	3.024e-09	1753	TRUE	reported	Uuhsrj	0.3506	2	TRUE	6021	0.0095699	35.3159	3.09469e-06
rs849532	G	A	G	A	0.3351	-0.0626	0.0421	0.9255	FALSE	FALSE	FALSE	HHCUlr	0.0969	0.5182	outcome	TRUE	reported	textfile	2	206552726	3657	0.0616	5.7e-08	1753	TRUE	reported	Uuhsrj	0.0421	2	TRUE	6021	0.00802717	29.5767	0.000101226
rs4426778	A	G	A	G	-0.1237	-0.0307	0.4558	0.4473	FALSE	FALSE	FALSE	HHCUlr	0.0496	0.5361	outcome	TRUE	reported	textfile	4	102780724	3657	0.02524	9.866e-07	1753	TRUE	reported	Uuhsrj	0.4558	2	TRUE	6021	0.00652518	24.0062	0.000500053
rs10171238	T	C	T	C	0.1442	0.0141	0.2088	0.7689	FALSE	FALSE	FALSE	HHCUlr	0.0589	0.8113	outcome	TRUE	reported	textfile	2	149568729	3657	0.0302	1.859e-06	1753	TRUE	reported	Uuhsrj	0.2088	2	TRUE	6021	0.00619573	22.7866	0.00030052
rs61731791	T	C	T	C	0.2019	-0.1812	0.0972	0.0363	FALSE	FALSE	FALSE	HHCUlr	0.1374	0.1873	outcome	TRUE	reported	textfile	19	50940778	3657	0.04254	2.149e-06	1753	TRUE	reported	Uuhsrj	0.0972	2	TRUE	6021	0.00612189	22.5133	0.00340135
rs7754613	T	C	T	C	0.1526	-0.0346	0.1797	0.8295	FALSE	FALSE	FALSE	HHCUlr	0.0651	0.5948	outcome	TRUE	reported	textfile	6	15902888	3657	0.03238	2.525e-06	1753	TRUE	reported	Uuhsrj	0.1797	2	TRUE	6021	0.00603672	22.1982	0.000707794
rs62299189	C	A	C	A	-0.2121	-0.0734	0.0804	0.1026	FALSE	FALSE	FALSE	HHCUlr	0.084	0.382	outcome	TRUE	reported	textfile	4	43192979	3657	0.04588	3.899e-06	1753	TRUE	reported	Uuhsrj	0.0804	2	TRUE	6021	0.00581004	21.3598	0.00189955
rs78373541	G	A	G	A	0.2667	-0.016	0.0472	0.0526	FALSE	FALSE	FALSE	HHCUlr	0.1154	0.8896	outcome	TRUE	reported	textfile	4	139616732	3657	0.05821	4.781e-06	1753	TRUE	reported	Uuhsrj	0.0472	2	TRUE	6021	0.00570742	20.9804	0.000423665
rs77463781	C	G	C	G	0.1693	-0.0108	0.134	0.0219	FALSE	TRUE	FALSE	HHCUlr	0.1887	0.9543	outcome	TRUE	reported	textfile	1	79464773	3657	0.03696	4.796e-06	1753	TRUE	reported	Uuhsrj	0.134	2	TRUE	6021	0.0057048	20.9707	0.000351448
rs74435765	T	C	T	C	-0.3934	0.0294	0.0217	0.0329	FALSE	FALSE	FALSE	HHCUlr	0.1591	0.8535	outcome	TRUE	reported	textfile	1	185522944	3657	0.08597	4.891e-06	1753	TRUE	reported	Uuhsrj	0.0217	2	TRUE	6021	0.00569338	20.9285	0.000479297
rs11051833	T	C	T	C	-0.3389	0.134	0.0286	0.0813	FALSE	FALSE	FALSE	HHCUlr	0.0918	0.1445	outcome	TRUE	reported	textfile	12	32330242	3657	0.07414	5.031e-06	1753	TRUE	reported	Uuhsrj	0.0286	2	TRUE	6021	0.00568118	20.8834	0.00683686
rs17136624	A	G	A	G	-0.1293	-0.1208	0.2546	0.271	FALSE	FALSE	FALSE	HHCUlr	0.0548	0.02745	outcome	TRUE	reported	textfile	16	3996282	3657	0.02835	5.303e-06	1753	TRUE	reported	Uuhsrj	0.2546	2	TRUE	6021	0.00565591	20.7899	0.0251502
rs7617301	C	A	C	A	0.174	0.0023	0.124	0.1098	FALSE	FALSE	FALSE	HHCUlr	0.0814	0.9774	outcome	TRUE	reported	textfile	3	119289916	3657	0.0382	5.378e-06	1753	TRUE	reported	Uuhsrj	0.124	2	TRUE	6021	0.00564144	20.7364	0.000354638
rs13181744	C	T	C	T	-0.1152	-0.0139	0.4002	0.3781	FALSE	FALSE	FALSE	HHCUlr	0.0511	0.785	outcome	TRUE	reported	textfile	5	120594915	3657	0.02545	6.167e-06	1753	TRUE	reported	Uuhsrj	0.4002	2	TRUE	6021	0.00557157	20.4782	0.000675007
rs117961939	T	C	T	C	-0.3034	-0.0308	0.0347	0.0179	FALSE	FALSE	FALSE	HHCUlr	0.2128	0.8848	outcome	TRUE	reported	textfile	8	132476096	3657	0.06719	6.497e-06	1753	TRUE	reported	Uuhsrj	0.0347	2	TRUE	6021	0.00554475	20.3791	0.000522143
rs78287249	T	G	T	G	-0.1865	-0.0971	0.0971	0.0787	FALSE	FALSE	FALSE	HHCUlr	0.0933	0.2985	outcome	TRUE	reported	textfile	11	60157281	3657	0.04132	6.553e-06	1753	TRUE	reported	Uuhsrj	0.0971	2	TRUE	6021	0.00553987	20.361	0.00353524
rs13381717	T	A	T	A	-0.2077	0.1289	0.0774	0.0667	FALSE	TRUE	FALSE	HHCUlr	0.1011	0.2023	outcome	TRUE	reported	textfile	18	352095	3657	0.04625	7.342e-06	1753	TRUE	reported	Uuhsrj	0.0774	2	TRUE	6021	0.00548449	20.1564	0.00586802
rs1838178	G	A	G	A	0.1146	0.0159	0.4009	0.3506	FALSE	FALSE	FALSE	HHCUlr	0.0524	0.7623	outcome	TRUE	reported	textfile	8	92858976	3657	0.02554	7.402e-06	1753	TRUE	reported	Uuhsrj	0.4009	2	TRUE	6021	0.00547543	20.1229	0.000810448
rs787045	C	G	C	G	-0.1629	0.0163	0.1298	0.1361	FALSE	TRUE	FALSE	HHCUlr	0.0725	0.8221	outcome	TRUE	reported	textfile	10	26831337	3657	0.03657	8.702e-06	1753	TRUE	reported	Uuhsrj	0.1298	2	TRUE	6021	0.00539656	19.8315	0.000746609
rs6454789	T	C	T	C	0.1147	0.0181	0.3776	0.5686	FALSE	FALSE	FALSE	HHCUlr	0.0491	0.7124	outcome	TRUE	reported	textfile	6	90677176	3657	0.02581	9.136e-06	1753	TRUE	reported	Uuhsrj	0.3776	2	TRUE	6021	0.00537139	19.7385	0.00105566
rs1453509	A	C	A	C	-0.1691	0.0614	0.1183	0.2294	FALSE	FALSE	FALSE	HHCUlr	0.0589	0.2972	outcome	TRUE	reported	textfile	16	17014673	3657	0.03813	9.535e-06	1753	TRUE	reported	Uuhsrj	0.1183	2	TRUE	6021	0.00534933	19.6569	0.00431821
rs35485457	T	G	T	G	-0.1404	0.0756	0.1962	0.3055	FALSE	FALSE	FALSE	HHCUlr	0.0528	0.1523	outcome	TRUE	reported	textfile	8	78679087	3657	0.03173	9.94e-06	1753	TRUE	reported	Uuhsrj	0.1962	2	TRUE	6021	0.00532537	19.5685	0.00913949
rs1883832	C	T	C	T	-0.1869	0.0307	0.3682	0.73	FALSE	FALSE	FALSE	okwyFi	0.0555	0.5797	outcome	TRUE	reported	textfile	20	44746982	3657	0.02576	4.895e-13	1754	TRUE	reported	EfN5FA	0.3682	2	TRUE	6021	0.0141904	52.6125	7.93032e-08
rs30006	C	T	C	T	-0.1907	-0.0931	0.2335	0.2553	FALSE	FALSE	FALSE	okwyFi	0.0554	0.09306	outcome	TRUE	reported	textfile	19	49847916	3657	0.02929	8.551e-11	1754	TRUE	reported	EfN5FA	0.2335	2	TRUE	6021	0.0114586	42.3667	4.26993e-05
rs4716010	A	G	A	G	0.1924	-0.0232	0.1806	0.8291	FALSE	FALSE	FALSE	okwyFi	0.0649	0.7214	outcome	TRUE	reported	textfile	6	15898371	3657	0.0321	2.238e-09	1754	TRUE	reported	EfN5FA	0.1806	2	TRUE	6021	0.00972813	35.9056	6.80049e-06
rs61731791	T	C	T	C	0.2363	-0.1812	0.0972	0.0363	FALSE	FALSE	FALSE	okwyFi	0.1374	0.1873	outcome	TRUE	reported	textfile	19	50940778	3657	0.04232	2.509e-08	1754	TRUE	reported	EfN5FA	0.0972	2	TRUE	6021	0.00845326	31.1601	0.000334407
rs9962656	A	C	A	C	0.14	-0.0166	0.3093	0.2587	FALSE	FALSE	FALSE	okwyFi	0.0562	0.7681	outcome	TRUE	reported	textfile	18	60847262	3657	0.02686	1.991e-07	1754	TRUE	reported	EfN5FA	0.3093	2	TRUE	6021	0.00737403	27.1523	8.70079e-05
rs74812685	T	A	T	A	0.2667	0.0092	0.0602	0.0336	FALSE	TRUE	FALSE	okwyFi	0.1464	0.95	outcome	TRUE	reported	textfile	4	2654756	3657	0.05235	3.693e-07	1754	TRUE	reported	EfN5FA	0.0602	2	TRUE	6021	0.0070472	25.9403	7.0473e-05
rs13381717	T	A	T	A	-0.2344	0.1289	0.0774	0.0667	FALSE	TRUE	FALSE	okwyFi	0.1011	0.2023	outcome	TRUE	reported	textfile	18	352095	3657	0.04602	3.685e-07	1754	TRUE	reported	EfN5FA	0.0774	2	TRUE	6021	0.00704412	25.9289	0.00124282
rs147717587	T	C	T	C	-0.4567	-0.0087	0.0544	0.1527	FALSE	FALSE	FALSE	okwyFi	0.0793	0.9123	outcome	TRUE	reported	textfile	6	32623828	3657	0.09143	6.151e-07	1754	TRUE	reported	EfN5FA	0.0544	2	TRUE	6021	0.00677652	24.9372	0.00010987
rs190420645	A	G	A	G	0.4086	-0.2171	0.0242	0.0148	FALSE	FALSE	FALSE	okwyFi	0.3141	0.4895	outcome	TRUE	reported	textfile	6	54235903	3657	0.08323	9.569e-07	1754	TRUE	reported	EfN5FA	0.0242	2	TRUE	6021	0.00654725	24.0879	0.000575531
rs1838178	G	A	G	A	0.1236	0.0159	0.4009	0.3506	FALSE	FALSE	FALSE	okwyFi	0.0524	0.7623	outcome	TRUE	reported	textfile	8	92858976	3657	0.02543	1.214e-06	1754	TRUE	reported	EfN5FA	0.4009	2	TRUE	6021	0.00641834	23.6106	0.000269728
rs11051833	T	C	T	C	-0.3556	0.134	0.0286	0.0813	FALSE	FALSE	FALSE	okwyFi	0.0918	0.1445	outcome	TRUE	reported	textfile	12	32330242	3657	0.07383	1.522e-06	1754	TRUE	reported	EfN5FA	0.0286	2	TRUE	6021	0.00630357	23.1857	0.00375977
rs34713734	A	C	A	C	0.1619	-0.0002	0.1533	0.1966	FALSE	FALSE	FALSE	okwyFi	0.0647	0.9978	outcome	TRUE	reported	textfile	2	122564113	3657	0.0339	1.862e-06	1754	TRUE	reported	EfN5FA	0.1533	2	TRUE	6021	0.00619825	22.7959	0.000169339
rs7608595	C	T	C	T	0.1244	0.0404	0.3325	0.5767	FALSE	FALSE	FALSE	okwyFi	0.0498	0.4177	outcome	TRUE	reported	textfile	2	223088415	3657	0.02612	1.99e-06	1754	TRUE	reported	EfN5FA	0.3325	2	TRUE	6021	0.0061643	22.6703	0.0011387
rs116144119	A	G	A	G	0.265	0.2309	0.0533	0.0203	FALSE	FALSE	FALSE	okwyFi	0.2079	0.2669	outcome	TRUE	reported	textfile	1	165812513	3657	0.05664	2.999e-06	1754	TRUE	reported	EfN5FA	0.0533	2	TRUE	6021	0.00595016	21.878	0.00266629
rs9999440	T	C	T	C	-0.1193	-0.0068	0.3644	0.3837	FALSE	FALSE	FALSE	okwyFi	0.0507	0.8931	outcome	TRUE	reported	textfile	4	102802051	3657	0.02591	4.293e-06	1754	TRUE	reported	EfN5FA	0.3644	2	TRUE	6021	0.00576382	21.1889	0.000391825
rs78368496	G	A	G	A	0.4046	-0.1133	0.02	0.0407	FALSE	FALSE	FALSE	okwyFi	0.1371	0.4084	outcome	TRUE	reported	textfile	11	19984329	3657	0.08819	4.631e-06	1754	TRUE	reported	EfN5FA	0.02	2	TRUE	6021	0.00572263	21.0366	0.00188978
rs160509	C	T	C	T	-0.2333	-0.0743	0.0593	0.8737	FALSE	FALSE	FALSE	okwyFi	0.0747	0.3198	outcome	TRUE	reported	textfile	5	9588308	3657	0.05172	6.641e-06	1754	TRUE	reported	EfN5FA	0.0593	2	TRUE	6021	0.00553322	20.3364	0.00324963
rs2493367	A	T	A	T	-0.3325	0.0047	0.0294	0.1082	FALSE	TRUE	FALSE	okwyFi	0.0863	0.9568	outcome	TRUE	reported	textfile	10	66219102	3657	0.07422	7.687e-06	1754	TRUE	reported	EfN5FA	0.0294	2	TRUE	6021	0.00545808	20.0587	0.000471241
rs10171238	T	C	T	C	0.1346	0.0141	0.2088	0.7689	FALSE	FALSE	FALSE	okwyFi	0.0589	0.8113	outcome	TRUE	reported	textfile	2	149568729	3657	0.03008	7.879e-06	1754	TRUE	reported	EfN5FA	0.2088	2	TRUE	6021	0.0054455	20.0123	0.000727886
rs10901783	C	T	C	T	0.1297	0.0479	0.2361	0.2149	FALSE	FALSE	FALSE	okwyFi	0.0594	0.4197	outcome	TRUE	reported	textfile	10	126294501	3657	0.02911	8.539e-06	1754	TRUE	reported	EfN5FA	0.2361	2	TRUE	6021	0.00539908	19.8407	0.00256756
rs787045	C	G	C	G	-0.1616	0.0163	0.1298	0.1361	FALSE	TRUE	FALSE	okwyFi	0.0725	0.8221	outcome	TRUE	reported	textfile	10	26831337	3657	0.03642	9.348e-06	1754	TRUE	reported	EfN5FA	0.1298	2	TRUE	6021	0.00535483	19.6773	0.000784463
rs55809481	C	T	C	T	-0.2424	-0.0907	0.2425	0.2484	FALSE	FALSE	FALSE	mqKcLs	0.0558	0.1042	outcome	TRUE	reported	textfile	19	49872521	3657	0.02879	5.438e-17	1755	TRUE	reported	O0uT8O	0.2425	2	TRUE	6021	0.019016	70.8507	1.9065e-08
rs10501383	T	C	T	C	-0.255	-0.0739	0.0971	0.0809	FALSE	FALSE	FALSE	mqKcLs	0.0912	0.4183	outcome	TRUE	reported	textfile	11	60164527	3657	0.04098	5.406e-10	1755	TRUE	reported	O0uT8O	0.0971	2	TRUE	6021	0.010477	38.6989	1.07724e-05
rs61731791	T	C	T	C	0.2328	-0.1812	0.0972	0.0363	FALSE	FALSE	FALSE	mqKcLs	0.1374	0.1873	outcome	TRUE	reported	textfile	19	50940778	3657	0.04226	3.857e-08	1755	TRUE	reported	O0uT8O	0.0972	2	TRUE	6021	0.00822987	30.3298	0.000418308
rs4716010	A	G	A	G	0.1717	-0.0232	0.1806	0.8291	FALSE	FALSE	FALSE	mqKcLs	0.0649	0.7214	outcome	TRUE	reported	textfile	6	15898371	3657	0.03209	9.318e-08	1755	TRUE	reported	O0uT8O	0.1806	2	TRUE	6021	0.00776765	28.613	6.47552e-05
rs849532	G	A	G	A	0.3227	-0.0626	0.0421	0.9255	FALSE	FALSE	FALSE	mqKcLs	0.0969	0.5182	outcome	TRUE	reported	textfile	2	206552726	3657	0.06129	1.489e-07	1755	TRUE	reported	O0uT8O	0.0421	2	TRUE	6021	0.0075234	27.7065	0.000176619
rs57271503	A	G	A	G	-0.158	-0.0149	0.2129	0.1688	FALSE	FALSE	FALSE	mqKcLs	0.066	0.8215	outcome	TRUE	reported	textfile	3	119244593	3657	0.03108	3.906e-07	1755	TRUE	reported	O0uT8O	0.2129	2	TRUE	6021	0.00701728	25.8294	0.00011064
rs3123557	T	C	T	C	-0.1247	-0.0474	0.4809	0.5624	FALSE	FALSE	FALSE	mqKcLs	0.0493	0.336	outcome	TRUE	reported	textfile	1	24204073	3657	0.02465	4.444e-07	1755	TRUE	reported	O0uT8O	0.4809	2	TRUE	6021	0.00694937	25.5777	0.000687974
rs179206	T	C	T	C	-0.2276	0.139	0.0737	0.0458	FALSE	FALSE	FALSE	mqKcLs	0.1198	0.2457	outcome	TRUE	reported	textfile	16	19303610	3657	0.04734	1.587e-06	1755	TRUE	reported	O0uT8O	0.0737	2	TRUE	6021	0.00628097	23.102	0.00210639
rs7608595	C	T	C	T	0.1231	0.0404	0.3325	0.5767	FALSE	FALSE	FALSE	mqKcLs	0.0498	0.4177	outcome	TRUE	reported	textfile	2	223088415	3657	0.0261	2.474e-06	1755	TRUE	reported	O0uT8O	0.3325	2	TRUE	6021	0.00604611	22.233	0.00129307
rs7179991	G	A	G	A	-0.2259	-0.002	0.0684	0.0747	FALSE	FALSE	FALSE	mqKcLs	0.0975	0.984	outcome	TRUE	reported	textfile	15	31811797	3657	0.04792	2.517e-06	1755	TRUE	reported	O0uT8O	0.0684	2	TRUE	6021	0.00604008	22.2106	0.000214225
rs6120395	G	A	G	A	-0.1201	-0.0604	0.3482	0.5062	FALSE	FALSE	FALSE	mqKcLs	0.0488	0.2153	outcome	TRUE	reported	textfile	20	32451693	3657	0.02578	3.294e-06	1755	TRUE	reported	O0uT8O	0.3482	2	TRUE	6021	0.00589964	21.6912	0.00361468
rs185205613	A	T	A	T	-0.2018	0.0716	0.0909	0.0233	FALSE	TRUE	FALSE	mqKcLs	0.2082	0.7308	outcome	TRUE	reported	textfile	12	48074625	3657	0.04345	3.52e-06	1755	TRUE	reported	O0uT8O	0.0909	2	TRUE	6021	0.00586386	21.5588	0.000564602
rs1838178	G	A	G	A	0.1167	0.0159	0.4009	0.3506	FALSE	FALSE	FALSE	mqKcLs	0.0524	0.7623	outcome	TRUE	reported	textfile	8	92858976	3657	0.02541	4.517e-06	1755	TRUE	reported	O0uT8O	0.4009	2	TRUE	6021	0.00573469	21.0812	0.000598585
rs140120241	A	G	A	G	0.1647	-0.1354	0.1328	0.0591	FALSE	FALSE	FALSE	mqKcLs	0.1101	0.2186	outcome	TRUE	reported	textfile	1	166021518	3657	0.03617	5.472e-06	1755	TRUE	reported	O0uT8O	0.1328	2	TRUE	6021	0.0056378	20.723	0.00462382
rs16948899	G	C	G	C	-0.1258	0.1166	0.28	0.267	FALSE	TRUE	FALSE	mqKcLs	0.0559	0.0368	outcome	TRUE	reported	textfile	16	50866572	3657	0.02769	5.667e-06	1755	TRUE	reported	O0uT8O	0.28	2	TRUE	6021	0.00561237	20.629	0.0215627
rs62194499	A	G	A	G	0.2192	0.1317	0.0714	0.0455	FALSE	FALSE	FALSE	mqKcLs	0.1298	0.3104	outcome	TRUE	reported	textfile	2	207417460	3657	0.04834	5.978e-06	1755	TRUE	reported	O0uT8O	0.0714	2	TRUE	6021	0.00559124	20.5509	0.0031834
rs2578469	A	G	A	G	-0.1169	0.0087	0.3246	0.2829	FALSE	FALSE	FALSE	mqKcLs	0.0577	0.8807	outcome	TRUE	reported	textfile	12	4101401	3657	0.02589	6.512e-06	1755	TRUE	reported	O0uT8O	0.3246	2	TRUE	6021	0.00554403	20.3764	0.000529867
rs75915436	T	C	T	C	-0.4991	0.0167	0.0131	0.0378	FALSE	FALSE	FALSE	mqKcLs	0.1423	0.9066	outcome	TRUE	reported	textfile	6	40648455	3657	0.1106	6.651e-06	1755	TRUE	reported	O0uT8O	0.0131	2	TRUE	6021	0.00553769	20.3529	0.000494567
rs75071948	G	T	G	T	0.2659	0.2354	0.0453	0.0382	FALSE	FALSE	FALSE	mqKcLs	0.1422	0.09775	outcome	TRUE	reported	textfile	9	75768836	3657	0.05907	6.977e-06	1755	TRUE	reported	O0uT8O	0.0453	2	TRUE	6021	0.00551034	20.2519	0.0114176
rs9537439	T	A	T	A	-0.118	-0.0007	0.3522	0.3893	FALSE	TRUE	FALSE	mqKcLs	0.0502	0.9896	outcome	TRUE	reported	textfile	13	57128500	3657	0.02633	7.691e-06	1755	TRUE	reported	O0uT8O	0.3522	2	TRUE	6021	0.00546209	20.0736	0.00042702
rs78368496	G	A	G	A	0.3921	-0.1133	0.02	0.0407	FALSE	FALSE	FALSE	mqKcLs	0.1371	0.4084	outcome	TRUE	reported	textfile	11	19984329	3657	0.08806	8.753e-06	1755	TRUE	reported	O0uT8O	0.02	2	TRUE	6021	0.00539217	19.8152	0.00269349
rs9842470	T	C	T	C	0.1459	-0.013	0.1708	0.8671	FALSE	FALSE	FALSE	mqKcLs	0.0733	0.8598	outcome	TRUE	reported	textfile	3	184221260	3657	0.03288	9.415e-06	1755	TRUE	reported	O0uT8O	0.1708	2	TRUE	6021	0.00535538	19.6793	0.000705136
rs79868028	A	G	A	G	0.222	0.094	0.0935	0.1081	FALSE	FALSE	FALSE	NrvDCk	0.0832	0.2586	outcome	TRUE	reported	textfile	10	133645848	3659	0.04248	1.839e-07	1756	TRUE	reported	B3tJzA	0.0935	2	TRUE	6021	0.00740875	27.296	0.000622314
rs17878304	T	C	T	C	-0.3226	-0.0183	0.0343	0.0774	FALSE	FALSE	FALSE	NrvDCk	0.0948	0.8469	outcome	TRUE	reported	textfile	19	4956161	3659	0.06692	1.492e-06	1756	TRUE	reported	B3tJzA	0.0343	2	TRUE	6021	0.0063111	23.2263	0.000234174
rs149234257	A	T	A	T	-0.4914	-0.0898	0.0141	0.0184	FALSE	TRUE	FALSE	NrvDCk	0.224	0.6885	outcome	TRUE	reported	textfile	2	7498941	3659	0.1029	1.871e-06	1756	TRUE	reported	B3tJzA	0.0141	2	TRUE	6021	0.00619411	22.793	0.000438603
rs144229045	T	C	T	C	-0.2348	-0.2078	0.067	0.0602	FALSE	FALSE	FALSE	NrvDCk	0.1123	0.06421	outcome	TRUE	reported	textfile	3	132962425	3659	0.04995	2.695e-06	1756	TRUE	reported	B3tJzA	0.067	2	TRUE	6021	0.00600272	22.0845	0.0102887
rs7751471	G	A	G	A	-0.1572	0.1408	0.1577	0.8692	FALSE	FALSE	FALSE	NrvDCk	0.0761	0.06417	outcome	TRUE	reported	textfile	6	155390391	3659	0.03351	2.824e-06	1756	TRUE	reported	B3tJzA	0.1577	2	TRUE	6021	0.00597846	21.9947	0.0105101
rs2060802	T	C	T	C	-0.1152	0.1117	0.3864	0.671	FALSE	FALSE	FALSE	NrvDCk	0.0526	0.03355	outcome	TRUE	reported	textfile	8	39502217	3659	0.02549	6.358e-06	1756	TRUE	reported	B3tJzA	0.3864	2	TRUE	6021	0.00555118	20.414	0.0240981
rs7302954	G	A	G	A	0.1147	-0.0536	0.3675	0.612	FALSE	FALSE	FALSE	NrvDCk	0.0501	0.2846	outcome	TRUE	reported	textfile	12	92020720	3659	0.02552	7.224e-06	1756	TRUE	reported	B3tJzA	0.3675	2	TRUE	6021	0.0054905	20.1896	0.00393218
rs141311171	T	G	T	G	-0.1354	-0.0175	0.2119	0.2573	FALSE	FALSE	FALSE	NrvDCk	0.0576	0.7607	outcome	TRUE	reported	textfile	17	77837606	3659	0.03019	7.514e-06	1756	TRUE	reported	B3tJzA	0.2119	2	TRUE	6021	0.00546724	20.1036	0.000817269
rs11668091	C	T	C	T	0.1581	-0.0057	0.139	0.1286	FALSE	FALSE	FALSE	NrvDCk	0.0746	0.9394	outcome	TRUE	reported	textfile	19	51583553	3659	0.03529	7.725e-06	1756	TRUE	reported	B3tJzA	0.139	2	TRUE	6021	0.00545535	20.0596	0.00049618
rs67448050	C	A	C	A	-0.1308	-0.0364	0.2344	0.1813	FALSE	FALSE	FALSE	NrvDCk	0.0646	0.5735	outcome	TRUE	reported	textfile	5	91379430	3659	0.02922	7.816e-06	1756	TRUE	reported	B3tJzA	0.2344	2	TRUE	6021	0.00544654	20.0271	0.00146992
rs55809481	C	T	C	T	-0.3192	-0.0907	0.2425	0.2484	FALSE	FALSE	FALSE	Avvijn	0.0558	0.1042	outcome	TRUE	reported	textfile	19	49872521	3657	0.02843	9.01e-29	1757	TRUE	reported	wroQtm	0.2425	2	TRUE	6021	0.0333218	125.99	5.89972e-15
rs61731791	T	C	T	C	0.2688	-0.1812	0.0972	0.0363	FALSE	FALSE	FALSE	Avvijn	0.1374	0.1873	outcome	TRUE	reported	textfile	19	50940778	3657	0.042	1.745e-10	1757	TRUE	reported	wroQtm	0.0972	2	TRUE	6021	0.0110764	40.9376	2.36004e-05
rs11187166	T	C	T	C	0.1757	-0.0712	0.1993	0.1821	FALSE	FALSE	FALSE	Avvijn	0.064	0.2659	outcome	TRUE	reported	textfile	10	94516008	3657	0.03163	2.974e-08	1757	TRUE	reported	wroQtm	0.1993	2	TRUE	6021	0.00836703	30.8395	0.000223178
rs909846	G	T	G	T	0.2058	0.0594	0.1256	0.9177	FALSE	FALSE	FALSE	Avvijn	0.09	0.509	outcome	TRUE	reported	textfile	6	15897003	3657	0.03711	3.141e-08	1757	TRUE	reported	wroQtm	0.1256	2	TRUE	6021	0.00833963	30.7377	7.42931e-05
rs1447085	G	T	G	T	0.1294	0.01	0.3584	0.534	FALSE	FALSE	FALSE	Avvijn	0.0495	0.8401	outcome	TRUE	reported	textfile	12	127798516	3657	0.02572	5.124e-07	1757	TRUE	reported	wroQtm	0.3584	2	TRUE	6021	0.00687394	25.2982	0.000123398
rs12480920	A	G	A	G	-0.1577	0.0423	0.1792	0.1958	FALSE	FALSE	FALSE	Avvijn	0.0636	0.5061	outcome	TRUE	reported	textfile	20	3862580	3657	0.032	8.736e-07	1757	TRUE	reported	wroQtm	0.1792	2	TRUE	6021	0.00659726	24.2731	0.000513275
rs66579172	T	A	T	A	-0.1366	-0.0063	0.2792	0.2721	FALSE	TRUE	FALSE	Avvijn	0.0606	0.9175	outcome	TRUE	reported	textfile	19	50928270	3657	0.02784	9.742e-07	1757	TRUE	reported	wroQtm	0.2792	2	TRUE	6021	0.00654016	24.0616	0.000143716
rs11230624	C	G	C	G	-0.1823	-0.133	0.1263	0.0894	FALSE	TRUE	FALSE	Avvijn	0.0978	0.1738	outcome	TRUE	reported	textfile	11	60952231	3657	0.03724	1.017e-06	1757	TRUE	reported	wroQtm	0.1263	2	TRUE	6021	0.00651017	23.9506	0.00252018
rs3961790	A	G	A	G	0.1193	-0.0034	0.4233	0.3857	FALSE	FALSE	FALSE	Avvijn	0.0525	0.9478	outcome	TRUE	reported	textfile	2	80108045	3657	0.02452	1.19e-06	1757	TRUE	reported	wroQtm	0.4233	2	TRUE	6021	0.00643151	23.6593	0.000148603
rs112898596	T	C	T	C	0.2709	0.0604	0.0505	0.0455	FALSE	FALSE	FALSE	Avvijn	0.1287	0.6388	outcome	TRUE	reported	textfile	22	42039509	3657	0.0562	1.491e-06	1757	TRUE	reported	wroQtm	0.0505	2	TRUE	6021	0.00631349	23.2224	0.000449322
rs11020715	G	A	G	A	-0.1261	0.0767	0.3418	0.4134	FALSE	FALSE	FALSE	Avvijn	0.0494	0.1202	outcome	TRUE	reported	textfile	11	93989208	3657	0.02638	1.841e-06	1757	TRUE	reported	wroQtm	0.3418	2	TRUE	6021	0.00620941	22.8372	0.00492392
rs9650093	G	A	G	A	0.142	0.014	0.2182	0.2094	FALSE	FALSE	FALSE	Avvijn	0.061	0.8185	outcome	TRUE	reported	textfile	8	127984089	3657	0.02983	2.017e-06	1757	TRUE	reported	wroQtm	0.2182	2	TRUE	6021	0.00615832	22.6481	0.000306784
rs77612075	T	C	T	C	0.3325	-0.0087	0.0293	0.0492	FALSE	FALSE	FALSE	Avvijn	0.1212	0.9428	outcome	TRUE	reported	textfile	5	162820460	3657	0.0714	3.334e-06	1757	TRUE	reported	wroQtm	0.0293	2	TRUE	6021	0.00589514	21.6745	0.000288849
rs4657041	C	T	C	T	-0.1225	-0.01	0.3344	0.5101	FALSE	FALSE	FALSE	Avvijn	0.0486	0.8373	outcome	TRUE	reported	textfile	1	161478859	3657	0.02636	3.493e-06	1757	TRUE	reported	wroQtm	0.3344	2	TRUE	6021	0.00587083	21.5846	0.000407539
rs9473626	A	C	A	C	0.141	0.0407	0.2114	0.1903	FALSE	FALSE	FALSE	Avvijn	0.0622	0.5132	outcome	TRUE	reported	textfile	6	49586550	3657	0.03067	4.46e-06	1757	TRUE	reported	wroQtm	0.2114	2	TRUE	6021	0.00574623	21.1239	0.0012808
rs73025928	T	C	T	C	-0.299	0.1874	0.0361	0.0533	FALSE	FALSE	FALSE	Avvijn	0.1169	0.109	outcome	TRUE	reported	textfile	11	123329504	3657	0.06541	4.999e-06	1757	TRUE	reported	wroQtm	0.0361	2	TRUE	6021	0.00568139	20.8841	0.00887978
rs60743549	C	G	C	G	-0.3947	-0.0926	0.0196	0.0417	FALSE	TRUE	FALSE	Avvijn	0.1701	0.5862	outcome	TRUE	reported	textfile	18	60704462	3657	0.08713	6.096e-06	1757	TRUE	reported	wroQtm	0.0196	2	TRUE	6021	0.00558012	20.5098	0.00121692
rs8110979	T	A	T	A	-0.2352	-0.1346	0.0576	0.0561	FALSE	TRUE	FALSE	Avvijn	0.1139	0.2373	outcome	TRUE	reported	textfile	19	6951925	3657	0.05197	6.19e-06	1757	TRUE	reported	wroQtm	0.0576	2	TRUE	6021	0.00556953	20.4706	0.00451428
rs1955934	G	A	G	A	-0.1218	0.1212	0.2918	0.6964	FALSE	FALSE	FALSE	Avvijn	0.0538	0.02436	outcome	TRUE	reported	textfile	14	37936489	3657	0.02692	6.236e-06	1757	TRUE	reported	wroQtm	0.2918	2	TRUE	6021	0.00556667	20.4601	0.0292
rs13275137	A	G	A	G	0.2361	0.0701	0.0597	0.0403	FALSE	FALSE	FALSE	Avvijn	0.1382	0.6122	outcome	TRUE	reported	textfile	8	36731742	3657	0.05222	6.327e-06	1757	TRUE	reported	wroQtm	0.0597	2	TRUE	6021	0.00555869	20.4306	0.00115069
rs9625961	G	A	G	A	0.126	-0.037	0.264	0.1545	FALSE	FALSE	FALSE	Avvijn	0.0846	0.6616	outcome	TRUE	reported	textfile	22	44323219	3657	0.02796	6.78e-06	1757	TRUE	reported	wroQtm	0.264	2	TRUE	6021	0.00552251	20.2969	0.00103028
rs6693971	C	G	C	G	-0.2283	0.0556	0.0611	0.1514	FALSE	TRUE	FALSE	Avvijn	0.0706	0.4314	outcome	TRUE	reported	textfile	1	3517573	3657	0.0513	8.789e-06	1757	TRUE	reported	wroQtm	0.0611	2	TRUE	6021	0.0053865	19.7943	0.0025049
rs7608595	C	T	C	T	0.1158	0.0404	0.3325	0.5767	FALSE	FALSE	FALSE	Avvijn	0.0498	0.4177	outcome	TRUE	reported	textfile	2	223088415	3657	0.02603	8.875e-06	1757	TRUE	reported	wroQtm	0.3325	2	TRUE	6021	0.0053827	19.7802	0.00263896
rs115308973	T	C	T	C	-0.1649	0.0481	0.1229	0.0511	FALSE	FALSE	FALSE	Avvijn	0.1184	0.6849	outcome	TRUE	reported	textfile	16	88134541	3657	0.03711	9.063e-06	1757	TRUE	reported	wroQtm	0.1229	2	TRUE	6021	0.00537027	19.7343	0.00114688
rs113560800	C	G	C	G	0.2909	0.1519	0.036	0.0285	FALSE	TRUE	FALSE	Avvijn	0.1618	0.3479	outcome	TRUE	reported	textfile	9	29393202	3657	0.06563	9.607e-06	1757	TRUE	reported	wroQtm	0.036	2	TRUE	6021	0.00534356	19.6356	0.00354863
rs30003	C	T	C	T	-0.2717	-0.0931	0.2304	0.2531	FALSE	FALSE	FALSE	lpBctD	0.0555	0.09326	outcome	TRUE	reported	textfile	19	49846398	3657	0.02911	1.712e-20	1758	TRUE	reported	OJq0E0	0.2304	2	TRUE	6021	0.0232673	87.0677	2.94779e-10
rs1569590	G	A	G	A	0.2257	0.078	0.1252	0.9171	FALSE	FALSE	FALSE	lpBctD	0.0895	0.3832	outcome	TRUE	reported	textfile	6	15898884	3657	0.03693	1.1e-09	1758	TRUE	reported	OJq0E0	0.1252	2	TRUE	6021	0.0101104	37.3308	1.89969e-05
rs4657041	C	T	C	T	-0.1315	-0.01	0.3344	0.5101	FALSE	FALSE	FALSE	lpBctD	0.0486	0.8373	outcome	TRUE	reported	textfile	1	161478859	3657	0.02632	6.105e-07	1758	TRUE	reported	OJq0E0	0.3344	2	TRUE	6021	0.00677954	24.9484	0.000139225
rs61731791	T	C	T	C	0.2065	-0.1812	0.0972	0.0363	FALSE	FALSE	FALSE	lpBctD	0.1374	0.1873	outcome	TRUE	reported	textfile	19	50940778	3657	0.04212	9.842e-07	1758	TRUE	reported	OJq0E0	0.0972	2	TRUE	6021	0.0065297	24.0229	0.00227326
rs77612075	T	C	T	C	0.3439	-0.0087	0.0293	0.0492	FALSE	FALSE	FALSE	lpBctD	0.1212	0.9428	outcome	TRUE	reported	textfile	5	162820460	3657	0.07146	1.551e-06	1758	TRUE	reported	OJq0E0	0.0293	2	TRUE	6021	0.0062932	23.1473	0.000178633
rs11187166	T	C	T	C	0.1499	-0.0712	0.1993	0.1821	FALSE	FALSE	FALSE	lpBctD	0.064	0.2659	outcome	TRUE	reported	textfile	10	94516008	3657	0.03164	2.245e-06	1758	TRUE	reported	OJq0E0	0.1993	2	TRUE	6021	0.00610025	22.4333	0.00229569
rs2114442	T	C	T	C	0.1168	0.0468	0.4249	0.4386	FALSE	FALSE	FALSE	lpBctD	0.0493	0.3421	outcome	TRUE	reported	textfile	4	100832060	3657	0.025	3.121e-06	1758	TRUE	reported	OJq0E0	0.4249	2	TRUE	6021	0.0059333	21.8156	0.00195026
rs2492599	T	C	T	C	-0.119	-0.0301	0.3652	0.5916	FALSE	FALSE	FALSE	lpBctD	0.0497	0.5446	outcome	TRUE	reported	textfile	1	24058449	3657	0.0255	3.172e-06	1758	TRUE	reported	OJq0E0	0.3652	2	TRUE	6021	0.00591984	21.7659	0.000950747
rs13080324	A	C	A	C	0.1159	-0.0294	0.4322	0.3284	FALSE	FALSE	FALSE	lpBctD	0.0522	0.5736	outcome	TRUE	reported	textfile	3	111952407	3657	0.02501	3.731e-06	1758	TRUE	reported	OJq0E0	0.4322	2	TRUE	6021	0.0058381	21.4636	0.000949071
rs149695230	G	T	G	T	0.1855	-0.1162	0.1079	0.0744	FALSE	FALSE	FALSE	lpBctD	0.1018	0.2536	outcome	TRUE	reported	textfile	11	60288804	3657	0.04005	3.73e-06	1758	TRUE	reported	OJq0E0	0.1079	2	TRUE	6021	0.005832	21.441	0.0031991
rs233495	T	C	T	C	-0.1142	0.0208	0.4415	0.5272	FALSE	FALSE	FALSE	lpBctD	0.0495	0.6748	outcome	TRUE	reported	textfile	6	14806317	3657	0.02469	3.869e-06	1758	TRUE	reported	OJq0E0	0.4415	2	TRUE	6021	0.0058161	21.3822	0.000708712
rs12460030	C	T	C	T	-0.2482	-0.0674	0.0555	0.9607	FALSE	FALSE	FALSE	lpBctD	0.1344	0.6159	outcome	TRUE	reported	textfile	19	3361489	3657	0.05368	3.891e-06	1758	TRUE	reported	OJq0E0	0.0555	2	TRUE	6021	0.00581195	21.3669	0.000853224
rs7035906	A	G	A	G	0.2917	-0.0068	0.0416	0.0644	FALSE	FALSE	FALSE	lpBctD	0.1063	0.9491	outcome	TRUE	reported	textfile	9	95898832	3657	0.06316	3.991e-06	1758	TRUE	reported	OJq0E0	0.0416	2	TRUE	6021	0.0057988	21.3182	0.000318611
rs179212	C	T	C	T	-0.212	0.1278	0.0772	0.0647	FALSE	FALSE	FALSE	lpBctD	0.1027	0.2131	outcome	TRUE	reported	textfile	16	19308868	3657	0.046	4.189e-06	1758	TRUE	reported	OJq0E0	0.0772	2	TRUE	6021	0.00577452	21.2285	0.0041495
rs295654	T	C	T	C	0.1171	-0.022	0.3887	0.5543	FALSE	FALSE	FALSE	lpBctD	0.0495	0.6571	outcome	TRUE	reported	textfile	5	58107171	3657	0.02541	4.233e-06	1758	TRUE	reported	OJq0E0	0.3887	2	TRUE	6021	0.00577384	21.2259	0.000785167
rs12554596	G	A	G	A	-0.1168	0.0314	0.3891	0.2119	FALSE	FALSE	FALSE	lpBctD	0.0632	0.6186	outcome	TRUE	reported	textfile	9	37002142	3657	0.02544	4.601e-06	1758	TRUE	reported	OJq0E0	0.3891	2	TRUE	6021	0.005731	21.0675	0.00092557
rs1422711	C	T	C	T	-0.119	0.0958	0.3374	0.5838	FALSE	FALSE	FALSE	lpBctD	0.0489	0.05029	outcome	TRUE	reported	textfile	5	143621838	3657	0.02595	4.681e-06	1758	TRUE	reported	OJq0E0	0.3374	2	TRUE	6021	0.00571747	21.0175	0.0159805
rs145640001	T	G	T	G	0.4237	0.1332	0.0161	0.0754	FALSE	FALSE	FALSE	lpBctD	0.1172	0.2559	outcome	TRUE	reported	textfile	8	97002096	3657	0.09413	6.955e-06	1758	TRUE	reported	OJq0E0	0.0161	2	TRUE	6021	0.00550981	20.2499	0.0043948
rs7128035	C	T	C	T	-0.1214	-0.0487	0.2893	0.707	FALSE	FALSE	FALSE	lpBctD	0.0533	0.3607	outcome	TRUE	reported	textfile	11	268078	3657	0.02721	8.325e-06	1758	TRUE	reported	OJq0E0	0.2893	2	TRUE	6021	0.00541374	19.8949	0.00313577
rs75071948	G	T	G	T	0.2609	0.2354	0.0453	0.0382	FALSE	FALSE	FALSE	lpBctD	0.1422	0.09775	outcome	TRUE	reported	textfile	9	75768836	3657	0.05887	9.591e-06	1758	TRUE	reported	OJq0E0	0.0453	2	TRUE	6021	0.00534206	19.6301	0.0133283
rs2578469	A	G	A	G	-0.114	0.0087	0.3246	0.2829	FALSE	FALSE	FALSE	lpBctD	0.0577	0.8807	outcome	TRUE	reported	textfile	12	4101401	3657	0.02575	9.936e-06	1758	TRUE	reported	OJq0E0	0.3246	2	TRUE	6021	0.005331	19.5892	0.000684004
rs1941018	G	A	G	A	-0.1965	0.0154	0.3919	0.5392	FALSE	FALSE	FALSE	TLrwWk	0.0493	0.7549	outcome	TRUE	reported	textfile	11	60268994	3657	0.02481	3.155e-15	1759	TRUE	reported	iylgrc	0.3919	2	TRUE	6021	0.016864	62.6952	1.57108e-09
rs6910382	G	C	G	C	0.2234	0.0721	0.1802	0.1701	FALSE	TRUE	FALSE	TLrwWk	0.065	0.2675	outcome	TRUE	reported	textfile	6	15914349	3657	0.0318	2.526e-12	1759	TRUE	reported	iylgrc	0.1802	2	TRUE	6021	0.0133157	49.3258	1.25596e-06
rs72836542	T	C	T	C	0.1572	-0.0435	0.3161	0.2874	FALSE	FALSE	FALSE	TLrwWk	0.0541	0.4209	outcome	TRUE	reported	textfile	6	14091682	3657	0.02688	5.42e-09	1759	TRUE	reported	iylgrc	0.3161	2	TRUE	6021	0.00926571	34.1829	3.93744e-05
rs30003	C	T	C	T	-0.1667	-0.0931	0.2304	0.2531	FALSE	FALSE	FALSE	TLrwWk	0.0555	0.09326	outcome	TRUE	reported	textfile	19	49846398	3657	0.02948	1.667e-08	1759	TRUE	reported	iylgrc	0.2304	2	TRUE	6021	0.00866783	31.9579	0.000620608
rs388354	C	A	C	A	-0.1343	-0.0534	0.4795	0.6045	FALSE	FALSE	FALSE	TLrwWk	0.0503	0.2879	outcome	TRUE	reported	textfile	7	40190449	3657	0.0244	3.934e-08	1759	TRUE	reported	iylgrc	0.4795	2	TRUE	6021	0.00821608	30.2785	0.000230848
rs55643835	T	C	T	C	-0.2769	-0.0428	0.0567	0.0854	FALSE	FALSE	FALSE	TLrwWk	0.0912	0.6389	outcome	TRUE	reported	textfile	6	33947909	3657	0.05393	2.97e-07	1759	TRUE	reported	iylgrc	0.0567	2	TRUE	6021	0.00715716	26.348	0.000172501
rs233495	T	C	T	C	-0.124	0.0208	0.4415	0.5272	FALSE	FALSE	FALSE	TLrwWk	0.0495	0.6748	outcome	TRUE	reported	textfile	6	14806317	3657	0.0248	5.97e-07	1759	TRUE	reported	iylgrc	0.4415	2	TRUE	6021	0.00678979	24.9863	0.000232563
rs2413592	G	A	G	A	-0.1245	0.066	0.3543	0.7174	FALSE	FALSE	FALSE	TLrwWk	0.0555	0.2344	outcome	TRUE	reported	textfile	22	39858196	3657	0.02565	1.256e-06	1759	TRUE	reported	iylgrc	0.3543	2	TRUE	6021	0.00640103	23.5465	0.00197997
rs6496328	T	C	T	C	-0.3022	0.0946	0.0387	0.1236	FALSE	FALSE	FALSE	TLrwWk	0.0751	0.2077	outcome	TRUE	reported	textfile	15	86988686	3657	0.06339	1.939e-06	1759	TRUE	reported	iylgrc	0.0387	2	TRUE	6021	0.00617635	22.7148	0.00286446
rs11051833	T	C	T	C	-0.3438	0.134	0.0286	0.0813	FALSE	FALSE	FALSE	TLrwWk	0.0918	0.1445	outcome	TRUE	reported	textfile	12	32330242	3657	0.07381	3.306e-06	1759	TRUE	reported	iylgrc	0.0286	2	TRUE	6021	0.00589776	21.6842	0.00555478
rs7404890	A	G	A	G	0.1518	0.0034	0.1792	0.7608	FALSE	FALSE	FALSE	TLrwWk	0.0592	0.9544	outcome	TRUE	reported	textfile	16	11007193	3657	0.03262	3.373e-06	1759	TRUE	reported	iylgrc	0.1792	2	TRUE	6021	0.0058869	21.644	0.00028195
rs12042193	G	A	G	A	-0.1193	-0.0253	0.3687	0.5308	FALSE	FALSE	FALSE	TLrwWk	0.0529	0.6329	outcome	TRUE	reported	textfile	1	116031657	3657	0.02575	3.764e-06	1759	TRUE	reported	iylgrc	0.3687	2	TRUE	6021	0.00583525	21.453	0.000789288
rs113371046	A	G	A	G	0.2324	0.0157	0.0639	0.0583	FALSE	FALSE	FALSE	TLrwWk	0.1101	0.8867	outcome	TRUE	reported	textfile	1	17595034	3657	0.05068	4.652e-06	1759	TRUE	reported	iylgrc	0.0639	2	TRUE	6021	0.00571721	21.0166	0.000422582
rs8025257	C	T	C	T	-0.1341	-0.019	0.2286	0.1849	FALSE	FALSE	FALSE	TLrwWk	0.0634	0.7645	outcome	TRUE	reported	textfile	15	89600226	3657	0.02938	5.16e-06	1759	TRUE	reported	iylgrc	0.2286	2	TRUE	6021	0.0056645	20.8217	0.000644258
rs117400501	T	C	T	C	0.3759	-0.1146	0.0221	0.0157	FALSE	FALSE	FALSE	TLrwWk	0.3079	0.7097	outcome	TRUE	reported	textfile	7	75444519	3657	0.08357	7.075e-06	1759	TRUE	reported	iylgrc	0.0221	2	TRUE	6021	0.00550203	20.2212	0.00091463
rs10785682	C	T	C	T	-0.1134	0.0601	0.413	0.4115	FALSE	FALSE	FALSE	TLrwWk	0.0495	0.225	outcome	TRUE	reported	textfile	12	47837477	3657	0.02525	7.28e-06	1759	TRUE	reported	iylgrc	0.413	2	TRUE	6021	0.00548516	20.1589	0.00522752
rs61731791	T	C	T	C	0.1901	-0.1812	0.0972	0.0363	FALSE	FALSE	FALSE	TLrwWk	0.1374	0.1873	outcome	TRUE	reported	textfile	19	50940778	3657	0.04236	7.414e-06	1759	TRUE	reported	iylgrc	0.0972	2	TRUE	6021	0.00547699	20.1287	0.0064161
rs73245560	C	T	C	T	0.4119	-0.0737	0.0182	0.0348	FALSE	FALSE	FALSE	TLrwWk	0.1467	0.6154	outcome	TRUE	reported	textfile	4	43987474	3657	0.09261	8.951e-06	1759	TRUE	reported	iylgrc	0.0182	2	TRUE	6021	0.00538022	19.7711	0.00139375
rs36056466	G	A	G	A	-0.1167	-0.0975	0.3425	0.4986	FALSE	FALSE	FALSE	TLrwWk	0.0486	0.04473	outcome	TRUE	reported	textfile	17	45083383	3657	0.02632	9.533e-06	1759	TRUE	reported	iylgrc	0.3425	2	TRUE	6021	0.00534708	19.6486	0.0237589
rs6509428	T	C	T	C	-0.2404	-0.0969	0.2323	0.2562	FALSE	FALSE	FALSE	p9YHYG	0.0554	0.08044	outcome	TRUE	reported	textfile	19	49853881	3657	0.02912	2.092e-16	1760	TRUE	reported	HqGbGq	0.2323	2	TRUE	6021	0.0182954	68.1159	6.09151e-08
rs6459417	T	C	T	C	0.2282	0.0274	0.1263	0.9133	FALSE	FALSE	FALSE	p9YHYG	0.0868	0.7525	outcome	TRUE	reported	textfile	6	15858996	3657	0.03694	7.248e-10	1760	TRUE	reported	HqGbGq	0.1263	2	TRUE	6021	0.0103277	38.1417	3.01526e-06
rs4447195	T	C	T	C	-0.2525	-0.015	0.0982	0.0809	FALSE	FALSE	FALSE	p9YHYG	0.0912	0.8691	outcome	TRUE	reported	textfile	11	60249734	3657	0.04163	1.453e-09	1760	TRUE	reported	HqGbGq	0.0982	2	TRUE	6021	0.00995951	36.7682	2.94496e-06
rs12554596	G	A	G	A	-0.1329	0.0314	0.3891	0.2119	FALSE	FALSE	FALSE	p9YHYG	0.0632	0.6186	outcome	TRUE	reported	textfile	9	37002142	3657	0.02547	1.917e-07	1760	TRUE	reported	HqGbGq	0.3891	2	TRUE	6021	0.00739002	27.2116	0.00014187
rs77612075	T	C	T	C	0.3517	-0.0087	0.0293	0.0492	FALSE	FALSE	FALSE	p9YHYG	0.1212	0.9428	outcome	TRUE	reported	textfile	5	162820460	3657	0.07161	9.462e-07	1760	TRUE	reported	HqGbGq	0.0293	2	TRUE	6021	0.00655265	24.1079	0.000130683
rs13133046	G	A	G	A	-0.3755	0.0113	0.0245	0.0968	FALSE	FALSE	FALSE	p9YHYG	0.0834	0.8925	outcome	TRUE	reported	textfile	4	23393356	3657	0.07765	1.384e-06	1760	TRUE	reported	HqGbGq	0.0245	2	TRUE	6021	0.00635395	23.3722	0.00019405
rs147717587	T	C	T	C	-0.438	-0.0087	0.0544	0.1527	FALSE	FALSE	FALSE	p9YHYG	0.0793	0.9123	outcome	TRUE	reported	textfile	6	32623828	3657	0.09174	1.878e-06	1760	TRUE	reported	HqGbGq	0.0544	2	TRUE	6021	0.00619451	22.7821	0.000220597
rs233495	T	C	T	C	-0.1166	0.0208	0.4415	0.5272	FALSE	FALSE	FALSE	p9YHYG	0.0495	0.6748	outcome	TRUE	reported	textfile	6	14806317	3657	0.02474	2.533e-06	1760	TRUE	reported	HqGbGq	0.4415	2	TRUE	6021	0.0060373	22.2004	0.000550051
rs149695230	G	T	G	T	0.1869	-0.1162	0.1079	0.0744	FALSE	FALSE	FALSE	p9YHYG	0.1018	0.2536	outcome	TRUE	reported	textfile	11	60288804	3657	0.04012	3.314e-06	1760	TRUE	reported	HqGbGq	0.1079	2	TRUE	6021	0.00589932	21.69	0.00298755
rs77330263	T	C	T	C	0.538	-0.12	0.0113	0.0229	FALSE	FALSE	FALSE	p9YHYG	0.2177	0.5814	outcome	TRUE	reported	textfile	6	149134235	3657	0.1156	3.382e-06	1760	TRUE	reported	HqGbGq	0.0113	2	TRUE	6021	0.00588788	21.6477	0.000874165
rs62340965	A	T	A	T	-0.1451	0.0631	0.2158	0.1716	FALSE	TRUE	FALSE	p9YHYG	0.0893	0.4799	outcome	TRUE	reported	textfile	4	190508875	3657	0.03129	3.644e-06	1760	TRUE	reported	HqGbGq	0.2158	2	TRUE	6021	0.00584591	21.4925	0.00128399
rs12460030	C	T	C	T	-0.2489	-0.0674	0.0555	0.9607	FALSE	FALSE	FALSE	p9YHYG	0.1344	0.6159	outcome	TRUE	reported	textfile	19	3361489	3657	0.05379	3.849e-06	1760	TRUE	reported	HqGbGq	0.0555	2	TRUE	6021	0.00582085	21.3998	0.000844679
rs9310657	G	T	G	T	0.1311	-0.0015	0.2363	0.7326	FALSE	FALSE	FALSE	p9YHYG	0.0554	0.9781	outcome	TRUE	reported	textfile	3	21797575	3657	0.02856	4.581e-06	1760	TRUE	reported	HqGbGq	0.2363	2	TRUE	6021	0.00572887	21.0597	0.000317899
rs10047347	T	C	T	C	0.117	0.015	0.4197	0.3593	FALSE	FALSE	FALSE	p9YHYG	0.0509	0.7676	outcome	TRUE	reported	textfile	10	26741516	3657	0.02555	4.785e-06	1760	TRUE	reported	HqGbGq	0.4197	2	TRUE	6021	0.0057014	20.9581	0.000610134
rs11205970	T	A	T	A	0.1723	0.007	0.1373	0.221	FALSE	TRUE	FALSE	p9YHYG	0.0591	0.9061	outcome	TRUE	reported	textfile	1	53008441	3657	0.03772	5.078e-06	1760	TRUE	reported	HqGbGq	0.1373	2	TRUE	6021	0.00567324	20.854	0.000421192
rs75146873	C	G	C	G	0.1888	-0.167	0.0991	0.0445	FALSE	TRUE	FALSE	p9YHYG	0.1253	0.1826	outcome	TRUE	reported	textfile	19	50953211	3657	0.04191	6.834e-06	1760	TRUE	reported	HqGbGq	0.0991	2	TRUE	6021	0.00551874	20.2829	0.00632179
rs2114442	T	C	T	C	0.1119	0.0468	0.4249	0.4386	FALSE	FALSE	FALSE	p9YHYG	0.0493	0.3421	outcome	TRUE	reported	textfile	4	100832060	3657	0.02506	8.236e-06	1760	TRUE	reported	HqGbGq	0.4249	2	TRUE	6021	0.00542265	19.9279	0.00333406
rs55809481	C	T	C	T	-0.3215	-0.0907	0.2425	0.2484	FALSE	FALSE	FALSE	XXj7SV	0.0558	0.1042	outcome	TRUE	reported	textfile	19	49872521	3657	0.02865	9.314e-29	1761	TRUE	reported	K2Kw6I	0.2425	2	TRUE	6021	0.0332878	125.856	6.11899e-15
rs10501383	T	C	T	C	-0.2991	-0.0739	0.0971	0.0809	FALSE	FALSE	FALSE	XXj7SV	0.0912	0.4183	outcome	TRUE	reported	textfile	11	60164527	3657	0.04099	3.609e-13	1761	TRUE	reported	K2Kw6I	0.0971	2	TRUE	6021	0.0143507	53.2157	1.57869e-07
rs35039517	A	G	A	G	0.1894	-0.0816	0.203	0.1839	FALSE	FALSE	FALSE	XXj7SV	0.0637	0.1999	outcome	TRUE	reported	textfile	10	94522438	3657	0.0315	1.998e-09	1761	TRUE	reported	K2Kw6I	0.203	2	TRUE	6021	0.00978907	36.1328	7.90934e-05
rs61731791	T	C	T	C	0.2358	-0.1812	0.0972	0.0363	FALSE	FALSE	FALSE	XXj7SV	0.1374	0.1873	outcome	TRUE	reported	textfile	19	50940778	3657	0.04238	2.826e-08	1761	TRUE	reported	K2Kw6I	0.0972	2	TRUE	6021	0.00839421	30.9406	0.000354804
rs1569590	G	A	G	A	0.207	0.078	0.1252	0.9171	FALSE	FALSE	FALSE	XXj7SV	0.0895	0.3832	outcome	TRUE	reported	textfile	6	15898884	3657	0.03723	2.876e-08	1761	TRUE	reported	K2Kw6I	0.1252	2	TRUE	6021	0.00838251	30.8971	0.000121346
rs9650093	G	A	G	A	0.1547	0.014	0.2182	0.2094	FALSE	FALSE	FALSE	XXj7SV	0.061	0.8185	outcome	TRUE	reported	textfile	8	127984089	3657	0.03003	2.74e-07	1761	TRUE	reported	K2Kw6I	0.2182	2	TRUE	6021	0.00720452	26.5236	8.96527e-05
rs12030328	G	A	G	A	-0.1301	-0.0265	0.3651	0.5928	FALSE	FALSE	FALSE	XXj7SV	0.0498	0.5943	outcome	TRUE	reported	textfile	1	24051614	3657	0.02571	4.356e-07	1761	TRUE	reported	K2Kw6I	0.3651	2	TRUE	6021	0.00695337	25.5925	0.000252874
rs179206	T	C	T	C	-0.2383	0.139	0.0737	0.0458	FALSE	FALSE	FALSE	XXj7SV	0.1198	0.2457	outcome	TRUE	reported	textfile	16	19303610	3657	0.04745	5.381e-07	1761	TRUE	reported	K2Kw6I	0.0737	2	TRUE	6021	0.00684961	25.208	0.00118149
rs8110979	T	A	T	A	-0.255	-0.1346	0.0576	0.0561	FALSE	TRUE	FALSE	XXj7SV	0.1139	0.2373	outcome	TRUE	reported	textfile	19	6951925	3657	0.05234	1.155e-06	1761	TRUE	reported	K2Kw6I	0.0576	2	TRUE	6021	0.00644879	23.7233	0.00185762
rs77612075	T	C	T	C	0.3425	-0.0087	0.0293	0.0492	FALSE	FALSE	FALSE	XXj7SV	0.1212	0.9428	outcome	TRUE	reported	textfile	5	162820460	3657	0.07195	2.004e-06	1761	TRUE	reported	K2Kw6I	0.0293	2	TRUE	6021	0.00615817	22.6476	0.00021023
rs75071948	G	T	G	T	0.2771	0.2354	0.0453	0.0382	FALSE	FALSE	FALSE	XXj7SV	0.1422	0.09775	outcome	TRUE	reported	textfile	9	75768836	3657	0.05934	3.122e-06	1761	TRUE	reported	K2Kw6I	0.0453	2	TRUE	6021	0.00592749	21.7942	0.00776832
rs74446027	T	C	T	C	0.2192	-0.0198	0.0697	0.1551	FALSE	FALSE	FALSE	XXj7SV	0.0682	0.7717	outcome	TRUE	reported	textfile	1	202171923	3657	0.04727	3.641e-06	1761	TRUE	reported	K2Kw6I	0.0697	2	TRUE	6021	0.00584573	21.4918	0.00051025
rs62122620	T	A	T	A	0.4715	0.0832	0.0144	0.0521	FALSE	TRUE	FALSE	XXj7SV	0.121	0.4916	outcome	TRUE	reported	textfile	19	14871311	3657	0.1023	4.21e-06	1761	TRUE	reported	K2Kw6I	0.0144	2	TRUE	6021	0.00577526	21.2312	0.00133207
rs73025942	C	G	C	G	-0.3089	0.2013	0.0345	0.051	FALSE	TRUE	FALSE	XXj7SV	0.1213	0.09688	outcome	TRUE	reported	textfile	11	123334349	3657	0.06709	4.28e-06	1761	TRUE	reported	K2Kw6I	0.0345	2	TRUE	6021	0.00576348	21.1876	0.00910743
rs7128035	C	T	C	T	-0.1256	-0.0487	0.2893	0.707	FALSE	FALSE	FALSE	XXj7SV	0.0533	0.3607	outcome	TRUE	reported	textfile	11	268078	3657	0.02742	4.777e-06	1761	TRUE	reported	K2Kw6I	0.2893	2	TRUE	6021	0.00570473	20.9704	0.00230599
rs11230624	C	G	C	G	-0.1704	-0.133	0.1263	0.0894	FALSE	TRUE	FALSE	XXj7SV	0.0978	0.1738	outcome	TRUE	reported	textfile	11	60952231	3657	0.03753	5.835e-06	1761	TRUE	reported	K2Kw6I	0.1263	2	TRUE	6021	0.00560552	20.6037	0.00610952
rs11138252	T	G	T	G	0.2987	0.0967	0.0335	0.1458	FALSE	FALSE	FALSE	XXj7SV	0.0708	0.172	outcome	TRUE	reported	textfile	9	82087111	3657	0.06606	6.332e-06	1761	TRUE	reported	K2Kw6I	0.0335	2	TRUE	6021	0.00555965	20.4341	0.00645952
rs13134942	T	C	T	C	0.1534	0.1453	0.1555	0.1857	FALSE	FALSE	FALSE	XXj7SV	0.0651	0.02562	outcome	TRUE	reported	textfile	4	181179470	3657	0.03399	6.578e-06	1761	TRUE	reported	K2Kw6I	0.1555	2	TRUE	6021	0.00553874	20.3569	0.0289188
rs112898596	T	C	T	C	0.2555	0.0604	0.0505	0.0455	FALSE	FALSE	FALSE	XXj7SV	0.1287	0.6388	outcome	TRUE	reported	textfile	22	42039509	3657	0.05665	6.672e-06	1761	TRUE	reported	K2Kw6I	0.0505	2	TRUE	6021	0.00553157	20.3303	0.00109308
rs12480920	A	G	A	G	-0.1447	0.0423	0.1792	0.1958	FALSE	FALSE	FALSE	XXj7SV	0.0636	0.5061	outcome	TRUE	reported	textfile	20	3862580	3657	0.03226	7.528e-06	1761	TRUE	reported	K2Kw6I	0.1792	2	TRUE	6021	0.00547143	20.1081	0.00177421
rs137894231	G	T	G	T	0.4974	-0.0527	0.0129	0.0193	FALSE	FALSE	FALSE	XXj7SV	0.2065	0.7984	outcome	TRUE	reported	textfile	2	29442718	3657	0.1112	7.996e-06	1761	TRUE	reported	K2Kw6I	0.0129	2	TRUE	6021	0.00544136	19.997	0.000757743
rs1447085	G	T	G	T	0.1157	0.01	0.3584	0.534	FALSE	FALSE	FALSE	XXj7SV	0.0495	0.8401	outcome	TRUE	reported	textfile	12	127798516	3657	0.02593	8.352e-06	1761	TRUE	reported	K2Kw6I	0.3584	2	TRUE	6021	0.00541475	19.8987	0.000694313
rs7608595	C	T	C	T	0.1162	0.0404	0.3325	0.5767	FALSE	FALSE	FALSE	XXj7SV	0.0498	0.4177	outcome	TRUE	reported	textfile	2	223088415	3657	0.02622	9.707e-06	1761	TRUE	reported	K2Kw6I	0.3325	2	TRUE	6021	0.0053419	19.6295	0.00275727
rs185205613	A	T	A	T	-0.1933	0.0716	0.0909	0.0233	FALSE	TRUE	FALSE	XXj7SV	0.2082	0.7308	outcome	TRUE	reported	textfile	12	48074625	3657	0.04362	9.602e-06	1761	TRUE	reported	K2Kw6I	0.0909	2	TRUE	6021	0.00534123	19.627	0.00103594
rs78988304	T	G	T	G	0.2863	0.0862	0.0386	0.0592	FALSE	FALSE	FALSE	XXj7SV	0.1183	0.4665	outcome	TRUE	reported	textfile	3	25982156	3657	0.06468	9.875e-06	1761	TRUE	reported	K2Kw6I	0.0386	2	TRUE	6021	0.00532914	19.5824	0.00236463
rs4939384	G	A	G	A	-0.2011	0.0184	0.3912	0.5405	FALSE	FALSE	FALSE	YDzKQ9	0.0494	0.7088	outcome	TRUE	reported	textfile	11	60273642	3658	0.02485	7.899e-16	1762	TRUE	reported	3IWYl4	0.3912	2	TRUE	6021	0.0175882	65.4536	8.54915e-10
rs12212931	G	T	G	T	0.2233	-0.0752	0.1803	0.8291	FALSE	FALSE	FALSE	YDzKQ9	0.0648	0.2459	outcome	TRUE	reported	textfile	6	15913304	3658	0.03173	2.328e-12	1762	TRUE	reported	3IWYl4	0.1803	2	TRUE	6021	0.0133584	49.4994	1.40407e-06
rs30003	C	T	C	T	-0.1786	-0.0931	0.2303	0.2531	FALSE	FALSE	FALSE	YDzKQ9	0.0555	0.09326	outcome	TRUE	reported	textfile	19	49846398	3658	0.02943	1.419e-09	1762	TRUE	reported	3IWYl4	0.2303	2	TRUE	6021	0.00996754	36.8082	0.00017891
rs72836542	T	C	T	C	0.1521	-0.0435	0.3162	0.2874	FALSE	FALSE	FALSE	YDzKQ9	0.0541	0.4209	outcome	TRUE	reported	textfile	6	14091682	3658	0.02688	1.638e-08	1762	TRUE	reported	3IWYl4	0.3162	2	TRUE	6021	0.00867704	32.0009	7.43611e-05
rs388354	C	A	C	A	-0.1274	-0.0534	0.4796	0.6045	FALSE	FALSE	FALSE	YDzKQ9	0.0503	0.2879	outcome	TRUE	reported	textfile	7	40190449	3658	0.02442	1.905e-07	1762	TRUE	reported	3IWYl4	0.4796	2	TRUE	6021	0.00738558	27.2026	0.000546561
rs233495	T	C	T	C	-0.1258	0.0208	0.4415	0.5272	FALSE	FALSE	FALSE	YDzKQ9	0.0495	0.6748	outcome	TRUE	reported	textfile	6	14806317	3658	0.02478	4.066e-07	1762	TRUE	reported	3IWYl4	0.4415	2	TRUE	6021	0.00699626	25.7585	0.000183456
rs79003098	A	T	A	T	-0.1645	-0.0232	0.159	0.2103	FALSE	TRUE	FALSE	YDzKQ9	0.0602	0.6996	outcome	TRUE	reported	textfile	2	81965038	3658	0.03357	1.006e-06	1762	TRUE	reported	3IWYl4	0.159	2	TRUE	6021	0.00652145	23.9989	0.000290673
rs77612075	T	C	T	C	0.3457	-0.0087	0.0293	0.0492	FALSE	FALSE	FALSE	YDzKQ9	0.1212	0.9428	outcome	TRUE	reported	textfile	5	162820460	3658	0.0718	1.528e-06	1762	TRUE	reported	3IWYl4	0.0293	2	TRUE	6021	0.00629742	23.1693	0.000177501
rs6496328	T	C	T	C	-0.3047	0.0946	0.0387	0.1236	FALSE	FALSE	FALSE	YDzKQ9	0.0751	0.2077	outcome	TRUE	reported	textfile	15	86988686	3658	0.06339	1.592e-06	1762	TRUE	reported	3IWYl4	0.0387	2	TRUE	6021	0.00627661	23.0922	0.00258962
rs7404890	A	G	A	G	0.1563	0.0034	0.1792	0.7608	FALSE	FALSE	FALSE	YDzKQ9	0.0592	0.9544	outcome	TRUE	reported	textfile	16	11007193	3658	0.03262	1.714e-06	1762	TRUE	reported	3IWYl4	0.1792	2	TRUE	6021	0.00623719	22.9463	0.0001843
rs11051833	T	C	T	C	-0.3505	0.134	0.0286	0.0813	FALSE	FALSE	FALSE	YDzKQ9	0.0918	0.1445	outcome	TRUE	reported	textfile	12	32330242	3658	0.07384	2.145e-06	1762	TRUE	reported	3IWYl4	0.0286	2	TRUE	6021	0.00612184	22.5193	0.00447531
rs11059642	A	G	A	G	0.1428	-0.0048	0.2012	0.2941	FALSE	FALSE	FALSE	YDzKQ9	0.0542	0.9301	outcome	TRUE	reported	textfile	12	128795644	3658	0.03036	2.635e-06	1762	TRUE	reported	3IWYl4	0.2012	2	TRUE	6021	0.00601161	22.1114	0.000260905
rs80155794	A	G	A	G	-0.3436	0.0556	0.0267	0.0686	FALSE	FALSE	FALSE	YDzKQ9	0.101	0.5819	outcome	TRUE	reported	textfile	5	178957291	3658	0.07401	3.556e-06	1762	TRUE	reported	3IWYl4	0.0267	2	TRUE	6021	0.00585774	21.5421	0.000901892
rs113371046	A	G	A	G	0.2331	0.0157	0.0638	0.0583	FALSE	FALSE	FALSE	YDzKQ9	0.1101	0.8867	outcome	TRUE	reported	textfile	1	17595034	3658	0.05062	4.279e-06	1762	TRUE	reported	3IWYl4	0.0638	2	TRUE	6021	0.0057635	21.1935	0.00039934
rs73086355	A	C	A	C	-0.2751	0.031	0.0432	0.0654	FALSE	FALSE	FALSE	YDzKQ9	0.1042	0.7659	outcome	TRUE	reported	textfile	20	11850850	3658	0.06018	4.997e-06	1762	TRUE	reported	3IWYl4	0.0432	2	TRUE	6021	0.00568014	20.8852	0.000628809
rs8025257	C	T	C	T	-0.1339	-0.019	0.2285	0.1849	FALSE	FALSE	FALSE	YDzKQ9	0.0634	0.7645	outcome	TRUE	reported	textfile	15	89600226	3658	0.02937	5.34e-06	1762	TRUE	reported	3IWYl4	0.2285	2	TRUE	6021	0.00565001	20.7738	0.000654577
rs55643835	T	C	T	C	-0.2438	-0.0428	0.0567	0.0854	FALSE	FALSE	FALSE	YDzKQ9	0.0912	0.6389	outcome	TRUE	reported	textfile	6	33947909	3658	0.05412	6.823e-06	1762	TRUE	reported	3IWYl4	0.0567	2	TRUE	6021	0.00551703	20.2822	0.00111021
rs73245560	C	T	C	T	0.4122	-0.0737	0.0182	0.0348	FALSE	FALSE	FALSE	YDzKQ9	0.1467	0.6154	outcome	TRUE	reported	textfile	4	43987474	3658	0.09255	8.688e-06	1762	TRUE	reported	3IWYl4	0.0182	2	TRUE	6021	0.0053935	19.8256	0.00137164
rs879299	G	T	G	T	0.287	-0.0324	0.1802	0.8302	FALSE	FALSE	FALSE	ZNv35R	0.0651	0.6183	outcome	TRUE	reported	textfile	6	15897007	3657	0.03212	6.361e-19	1763	TRUE	reported	yTbSsw	0.1802	2	TRUE	6021	0.0213653	79.7949	1.86928e-11
rs7939177	T	C	T	C	-0.1877	0.0148	0.3898	0.5398	FALSE	FALSE	FALSE	ZNv35R	0.0492	0.7632	outcome	TRUE	reported	textfile	11	60266070	3657	0.02497	7.116e-14	1763	TRUE	reported	yTbSsw	0.3898	2	TRUE	6021	0.0152162	56.4747	1.01275e-08
rs12026973	T	G	T	G	-0.1927	-0.0674	0.1162	0.1604	FALSE	FALSE	FALSE	ZNv35R	0.0668	0.3131	outcome	TRUE	reported	textfile	1	107824037	3657	0.03837	5.369e-07	1763	TRUE	reported	yTbSsw	0.1162	2	TRUE	6021	0.00684967	25.2082	0.000849012
rs73175579	A	C	A	C	0.3017	0.0856	0.0435	0.0373	FALSE	FALSE	FALSE	ZNv35R	0.1428	0.5489	outcome	TRUE	reported	textfile	3	185524179	3657	0.06046	6.299e-07	1763	TRUE	reported	yTbSsw	0.0435	2	TRUE	6021	0.00676304	24.8872	0.000366951
rs233495	T	C	T	C	-0.1237	0.0208	0.4415	0.5272	FALSE	FALSE	FALSE	ZNv35R	0.0495	0.6748	outcome	TRUE	reported	textfile	6	14806317	3657	0.02493	7.257e-07	1763	TRUE	reported	yTbSsw	0.4415	2	TRUE	6021	0.00668738	24.6069	0.000261443
rs72836542	T	C	T	C	0.1277	-0.0435	0.3161	0.2874	FALSE	FALSE	FALSE	ZNv35R	0.0541	0.4209	outcome	TRUE	reported	textfile	6	14091682	3657	0.02705	2.428e-06	1763	TRUE	reported	yTbSsw	0.3161	2	TRUE	6021	0.00605736	22.2746	0.00125799
rs118186161	G	C	G	C	-0.2376	0.2108	0.0643	0.0441	FALSE	TRUE	FALSE	ZNv35R	0.1433	0.1412	outcome	TRUE	reported	textfile	19	17549328	3657	0.05084	3.063e-06	1763	TRUE	reported	yTbSsw	0.0643	2	TRUE	6021	0.00593705	21.8295	0.00546531
rs34486765	A	G	A	G	0.1233	0.0683	0.3094	0.2026	FALSE	FALSE	FALSE	ZNv35R	0.0633	0.2806	outcome	TRUE	reported	textfile	19	49915911	3657	0.02664	3.825e-06	1763	TRUE	reported	yTbSsw	0.3094	2	TRUE	6021	0.00582366	21.4102	0.00284789
rs114212270	C	T	C	T	-0.245	-0.0309	0.0569	0.07	FALSE	FALSE	FALSE	ZNv35R	0.105	0.7683	outcome	TRUE	reported	textfile	2	174337105	3657	0.05299	3.894e-06	1763	TRUE	reported	yTbSsw	0.0569	2	TRUE	6021	0.0058115	21.3652	0.000535927
rs9910861	A	T	A	T	-0.1755	-0.1098	0.1147	0.2254	FALSE	TRUE	FALSE	ZNv35R	0.0654	0.09343	outcome	TRUE	reported	textfile	17	2801009	3657	0.03837	4.951e-06	1763	TRUE	reported	yTbSsw	0.1147	2	TRUE	6021	0.00568811	20.909	0.0101055
rs73252531	C	A	C	A	0.1762	0.0446	0.1136	0.1119	FALSE	FALSE	FALSE	ZNv35R	0.0803	0.5789	outcome	TRUE	reported	textfile	4	25162256	3657	0.03894	6.215e-06	1763	TRUE	reported	yTbSsw	0.1136	2	TRUE	6021	0.00556763	20.4636	0.00126373
rs978366	G	C	G	C	-0.1644	-0.0365	0.1321	0.1651	FALSE	TRUE	FALSE	ZNv35R	0.0691	0.5977	outcome	TRUE	reported	textfile	10	95731909	3657	0.0364	6.478e-06	1763	TRUE	reported	yTbSsw	0.1321	2	TRUE	6021	0.00554703	20.3875	0.00121993
rs11055535	C	T	C	T	0.1658	-0.0455	0.1313	0.1076	FALSE	FALSE	FALSE	ZNv35R	0.0797	0.5677	outcome	TRUE	reported	textfile	12	13754468	3657	0.03686	7.129e-06	1763	TRUE	reported	yTbSsw	0.1313	2	TRUE	6021	0.00550221	20.2218	0.00140561
rs11627327	G	A	G	A	-0.1949	-0.0096	0.0908	0.0842	FALSE	FALSE	FALSE	ZNv35R	0.0892	0.9144	outcome	TRUE	reported	textfile	14	26441807	3657	0.04334	7.121e-06	1763	TRUE	reported	yTbSsw	0.0908	2	TRUE	6021	0.00549953	20.212	0.000506397
rs12473410	G	C	G	C	-0.2733	0.1568	0.0421	0.1131	FALSE	TRUE	FALSE	ZNv35R	0.0771	0.0421	outcome	TRUE	reported	textfile	2	115568051	3657	0.06115	8.072e-06	1763	TRUE	reported	yTbSsw	0.0421	2	TRUE	6021	0.00543245	19.9641	0.0230888
rs34900401	G	A	G	A	0.2107	0.1262	0.0756	0.0899	FALSE	FALSE	FALSE	ZNv35R	0.0932	0.1759	outcome	TRUE	reported	textfile	7	148563716	3657	0.04732	8.77e-06	1763	TRUE	reported	yTbSsw	0.0756	2	TRUE	6021	0.00539221	19.8154	0.00744062
rs10958698	T	C	T	C	0.1208	-0.0262	0.3013	0.4117	FALSE	FALSE	FALSE	ZNv35R	0.0493	0.5949	outcome	TRUE	reported	textfile	8	41641075	3657	0.0272	9.161e-06	1763	TRUE	reported	yTbSsw	0.3013	2	TRUE	6021	0.00536457	19.7133	0.00150889
rs145131147	A	G	A	G	0.1127	-0.0168	0.4234	0.5486	FALSE	FALSE	FALSE	ZNv35R	0.0531	0.7523	outcome	TRUE	reported	textfile	14	55101477	3657	0.02543	9.646e-06	1763	TRUE	reported	yTbSsw	0.4234	2	TRUE	6021	0.005342	19.6299	0.000974656
rs72683667	T	C	T	C	-0.4311	-0.1144	0.0164	0.0635	FALSE	FALSE	FALSE	ZNv35R	0.1069	0.2846	outcome	TRUE	reported	textfile	1	78106407	3657	0.09737	9.81e-06	1763	TRUE	reported	yTbSsw	0.0164	2	TRUE	6021	0.00533162	19.5915	0.004639
rs2236073	A	G	A	G	0.1789	0.0807	0.4002	0.5504	FALSE	FALSE	FALSE	E1lo0J	0.0502	0.1077	outcome	TRUE	reported	textfile	6	106898421	3654	0.02478	6.376e-13	1764	TRUE	reported	pwbwPL	0.4002	2	TRUE	6021	0.0140637	52.0931	2.68254e-06
rs7246669	G	A	G	A	0.1513	0.0482	0.2716	0.7642	FALSE	FALSE	FALSE	E1lo0J	0.0581	0.4071	outcome	TRUE	reported	textfile	19	16442023	3654	0.0275	4.036e-08	1764	TRUE	reported	pwbwPL	0.2716	2	TRUE	6021	0.00821601	30.2534	0.000131187
rs12200293	A	C	A	C	-0.3191	0.1168	0.0463	0.1034	FALSE	FALSE	FALSE	E1lo0J	0.0814	0.1514	outcome	TRUE	reported	textfile	6	101259222	3654	0.05878	6.025e-08	1764	TRUE	reported	pwbwPL	0.0463	2	TRUE	6021	0.00800087	29.4548	0.000686488
rs1471412	T	C	T	C	-0.1618	-0.0059	0.1463	0.8574	FALSE	FALSE	FALSE	E1lo0J	0.0712	0.9344	outcome	TRUE	reported	textfile	4	131810654	3654	0.03443	2.707e-06	1764	TRUE	reported	pwbwPL	0.1463	2	TRUE	6021	0.00600755	22.0722	0.000259888
rs7775235	G	A	G	A	-0.1256	-0.0265	0.305	0.2652	FALSE	FALSE	FALSE	E1lo0J	0.0562	0.6372	outcome	TRUE	reported	textfile	6	107702645	3654	0.02683	2.97e-06	1764	TRUE	reported	pwbwPL	0.305	2	TRUE	6021	0.00596173	21.9028	0.00067559
rs78157884	A	T	A	T	0.213	0.1613	0.081	0.0654	FALSE	TRUE	FALSE	E1lo0J	0.1048	0.1236	outcome	TRUE	reported	textfile	18	50026310	3654	0.04556	3.043e-06	1764	TRUE	reported	pwbwPL	0.081	2	TRUE	6021	0.00594611	21.8451	0.00617139
rs138281696	C	T	C	T	0.3547	0.1575	0.0275	0.0202	FALSE	FALSE	FALSE	E1lo0J	0.1987	0.4281	outcome	TRUE	reported	textfile	12	112016920	3654	0.07701	4.246e-06	1764	TRUE	reported	pwbwPL	0.0275	2	TRUE	6021	0.00577225	21.2027	0.00167415
rs62071983	A	G	A	G	-0.3927	0.1046	0.0201	0.02	FALSE	FALSE	FALSE	E1lo0J	0.214	0.6248	outcome	TRUE	reported	textfile	17	44923447	3654	0.08547	4.48e-06	1764	TRUE	reported	pwbwPL	0.0201	2	TRUE	6021	0.00574413	21.0987	0.000898623
rs12930821	C	G	C	G	-0.1324	0.0172	0.2408	0.2938	FALSE	TRUE	FALSE	E1lo0J	0.0545	0.752	outcome	TRUE	reported	textfile	16	58054671	3654	0.02886	4.638e-06	1764	TRUE	reported	pwbwPL	0.2408	2	TRUE	6021	0.00572691	21.0351	0.000622898
rs34719184	A	G	A	G	-0.1504	-0.0328	0.168	0.1971	FALSE	FALSE	FALSE	E1lo0J	0.0619	0.5967	outcome	TRUE	reported	textfile	2	546536	3654	0.03301	5.397e-06	1764	TRUE	reported	pwbwPL	0.168	2	TRUE	6021	0.00564905	20.7476	0.00109455
rs7153153	A	T	A	T	0.1441	-0.065	0.185	0.2071	FALSE	TRUE	FALSE	E1lo0J	0.0605	0.2825	outcome	TRUE	reported	textfile	14	89049488	3654	0.03168	5.605e-06	1764	TRUE	reported	pwbwPL	0.185	2	TRUE	6021	0.00563037	20.6785	0.00344989
rs4942468	A	C	A	C	-0.1192	-0.0401	0.319	0.7202	FALSE	FALSE	FALSE	E1lo0J	0.0553	0.4678	outcome	TRUE	reported	textfile	13	46618290	3654	0.02622	5.617e-06	1764	TRUE	reported	pwbwPL	0.319	2	TRUE	6021	0.00562431	20.6561	0.00170595
rs10986008	C	T	C	T	-0.1113	-0.0275	0.4852	0.5177	FALSE	FALSE	FALSE	E1lo0J	0.049	0.5749	outcome	TRUE	reported	textfile	9	126166033	3654	0.02464	6.452e-06	1764	TRUE	reported	pwbwPL	0.4852	2	TRUE	6021	0.00555293	20.3925	0.00130456
rs3859588	A	T	A	T	0.1234	0.0595	0.2745	0.2362	FALSE	TRUE	FALSE	E1lo0J	0.0593	0.3155	outcome	TRUE	reported	textfile	20	46476143	3654	0.02741	6.911e-06	1764	TRUE	reported	pwbwPL	0.2745	2	TRUE	6021	0.00551622	20.257	0.00337346
rs10125165	G	A	G	A	0.2206	0.064	0.0658	0.1276	FALSE	FALSE	FALSE	E1lo0J	0.0744	0.3895	outcome	TRUE	reported	textfile	9	33093991	3654	0.04934	8.041e-06	1764	TRUE	reported	pwbwPL	0.0658	2	TRUE	6021	0.00544095	19.9791	0.00274389
rs9391944	A	G	A	G	-0.1299	-0.0325	0.2262	0.2451	FALSE	FALSE	FALSE	E1lo0J	0.0569	0.568	outcome	TRUE	reported	textfile	6	2085954	3654	0.02913	8.538e-06	1764	TRUE	reported	pwbwPL	0.2262	2	TRUE	6021	0.00541267	19.8747	0.00155912
rs72901387	A	G	A	G	-0.2237	0.0235	0.0623	0.0603	FALSE	FALSE	FALSE	E1lo0J	0.1144	0.8371	outcome	TRUE	reported	textfile	11	44940633	3654	0.05037	9.258e-06	1764	TRUE	reported	pwbwPL	0.0623	2	TRUE	6021	0.00536885	19.7129	0.000741176
rs2236073	A	G	A	G	0.1681	0.0807	0.4003	0.5504	FALSE	FALSE	FALSE	zcRduW	0.0502	0.1077	outcome	TRUE	reported	textfile	6	106898421	3655	0.02484	1.541e-11	1765	TRUE	reported	WXSzho	0.4003	2	TRUE	6021	0.0123748	45.7714	1.43113e-05
rs12200293	A	C	A	C	-0.306	0.1168	0.0462	0.1034	FALSE	FALSE	FALSE	zcRduW	0.0814	0.1514	outcome	TRUE	reported	textfile	6	101259222	3655	0.05889	2.143e-07	1765	TRUE	reported	WXSzho	0.0462	2	TRUE	6021	0.0073329	26.985	0.00131874
rs12930821	C	G	C	G	-0.1445	0.0172	0.2408	0.2938	FALSE	TRUE	FALSE	zcRduW	0.0545	0.752	outcome	TRUE	reported	textfile	16	58054671	3655	0.02886	5.783e-07	1765	TRUE	reported	WXSzho	0.2408	2	TRUE	6021	0.00681219	25.0556	0.000176194
rs4942468	A	C	A	C	-0.1257	-0.0401	0.3189	0.7202	FALSE	FALSE	FALSE	zcRduW	0.0553	0.4678	outcome	TRUE	reported	textfile	13	46618290	3655	0.02624	1.713e-06	1765	TRUE	reported	WXSzho	0.3189	2	TRUE	6021	0.00623932	22.9353	0.000871525
rs285250	C	T	C	T	0.1309	0.0333	0.2773	0.7033	FALSE	FALSE	FALSE	zcRduW	0.0557	0.5502	outcome	TRUE	reported	textfile	19	16416430	3655	0.02745	1.931e-06	1765	TRUE	reported	WXSzho	0.2773	2	TRUE	6021	0.0061832	22.7278	0.000698541
rs4862454	A	G	A	G	-0.1279	-0.0289	0.2981	0.3714	FALSE	FALSE	FALSE	zcRduW	0.0652	0.6573	outcome	TRUE	reported	textfile	4	185816062	3655	0.02721	2.693e-06	1765	TRUE	reported	WXSzho	0.2981	2	TRUE	6021	0.00600868	22.0824	0.000600206
rs7116224	A	G	A	G	-0.1154	0.0522	0.4442	0.4465	FALSE	FALSE	FALSE	zcRduW	0.0496	0.292	outcome	TRUE	reported	textfile	11	15734002	3655	0.02496	3.932e-06	1765	TRUE	reported	WXSzho	0.4442	2	TRUE	6021	0.00581437	21.3641	0.00273016
rs13171255	G	A	G	A	0.1606	-0.0499	0.1514	0.1495	FALSE	FALSE	FALSE	zcRduW	0.0698	0.4751	outcome	TRUE	reported	textfile	5	159374162	3655	0.03496	4.493e-06	1765	TRUE	reported	WXSzho	0.1514	2	TRUE	6021	0.00574064	21.0916	0.00146909
rs1471412	T	C	T	C	-0.1559	-0.0059	0.1462	0.8574	FALSE	FALSE	FALSE	zcRduW	0.0712	0.9344	outcome	TRUE	reported	textfile	4	131810654	3655	0.03447	6.321e-06	1765	TRUE	reported	WXSzho	0.1462	2	TRUE	6021	0.00556543	20.4443	0.000442724
rs17370695	C	A	C	A	-0.1585	0.014	0.1491	0.0717	FALSE	FALSE	FALSE	zcRduW	0.1025	0.8913	outcome	TRUE	reported	textfile	5	92906685	3655	0.0351	6.46e-06	1765	TRUE	reported	WXSzho	0.1491	2	TRUE	6021	0.00554805	20.3801	0.00051159
rs34548572	A	G	A	G	-0.1374	-0.0268	0.1984	0.1749	FALSE	FALSE	FALSE	zcRduW	0.0647	0.6781	outcome	TRUE	reported	textfile	3	4748193	3655	0.03057	7.219e-06	1765	TRUE	reported	WXSzho	0.1984	2	TRUE	6021	0.00549669	20.1904	0.00101103
rs629732	A	G	A	G	0.1134	-0.0215	0.4274	0.5601	FALSE	FALSE	FALSE	zcRduW	0.0504	0.6693	outcome	TRUE	reported	textfile	1	112356263	3655	0.02531	7.625e-06	1765	TRUE	reported	WXSzho	0.4274	2	TRUE	6021	0.0054623	20.0634	0.00108042
rs78157884	A	T	A	T	0.2046	0.1613	0.081	0.0654	FALSE	TRUE	FALSE	zcRduW	0.1048	0.1236	outcome	TRUE	reported	textfile	18	50026310	3655	0.04567	7.719e-06	1765	TRUE	reported	WXSzho	0.081	2	TRUE	6021	0.00546114	20.0591	0.00974516
rs9478944	A	G	A	G	0.1656	0.0768	0.1207	0.7927	FALSE	FALSE	FALSE	zcRduW	0.0615	0.2113	outcome	TRUE	reported	textfile	6	151400649	3655	0.03714	8.504e-06	1765	TRUE	reported	WXSzho	0.1207	2	TRUE	6021	0.00540995	19.8701	0.00602383
rs147649139	G	T	G	T	-0.4	0.1601	0.0193	0.0182	FALSE	FALSE	FALSE	zcRduW	0.2245	0.4756	outcome	TRUE	reported	textfile	12	2310188	3655	0.09017	9.451e-06	1765	TRUE	reported	WXSzho	0.0193	2	TRUE	6021	0.00535521	19.6679	0.00223033
rs2236073	A	G	A	G	0.1396	0.0807	0.4002	0.5504	FALSE	FALSE	FALSE	oZ7w1z	0.0502	0.1077	outcome	TRUE	reported	textfile	6	106898421	3638	0.02534	3.862e-08	1766	TRUE	reported	WyTNWh	0.4002	2	TRUE	6021	0.00827345	30.3332	0.000788259
rs77636548	C	T	C	T	-0.3484	-0.0351	0.0346	0.0328	FALSE	FALSE	FALSE	oZ7w1z	0.1622	0.8288	outcome	TRUE	reported	textfile	14	43192207	3638	0.06738	2.448e-07	1766	TRUE	reported	WyTNWh	0.0346	2	TRUE	6021	0.00729544	26.7212	8.0027e-05
rs8089264	T	C	T	C	0.2949	-0.0284	0.0469	0.0697	FALSE	FALSE	FALSE	oZ7w1z	0.0967	0.7693	outcome	TRUE	reported	textfile	18	46221152	3638	0.05956	7.692e-07	1766	TRUE	reported	WyTNWh	0.0469	2	TRUE	6021	0.00669361	24.502	0.000195844
rs792792	T	C	T	C	-0.1949	-0.0396	0.115	0.9241	FALSE	FALSE	FALSE	oZ7w1z	0.0966	0.682	outcome	TRUE	reported	textfile	17	51153533	3638	0.03989	1.072e-06	1766	TRUE	reported	WyTNWh	0.115	2	TRUE	6021	0.00651917	23.8592	0.000316324
rs138034828	C	G	C	G	0.2825	0.4266	0.0482	0.0241	FALSE	TRUE	FALSE	oZ7w1z	0.2058	0.03817	outcome	TRUE	reported	textfile	10	111599201	3638	0.05859	1.486e-06	1766	TRUE	reported	WyTNWh	0.0482	2	TRUE	6021	0.00634981	23.2355	0.0113828
rs9479391	A	T	A	T	-0.2277	0.1613	0.0722	0.1364	FALSE	TRUE	FALSE	oZ7w1z	0.0716	0.0242	outcome	TRUE	reported	textfile	6	153107656	3638	0.04877	3.138e-06	1766	TRUE	reported	WyTNWh	0.0722	2	TRUE	6021	0.00595612	21.7862	0.0214411
rs783418	C	G	C	G	-0.1534	0.0234	0.166	0.0826	FALSE	TRUE	FALSE	oZ7w1z	0.0894	0.7936	outcome	TRUE	reported	textfile	6	106962679	3638	0.03335	4.361e-06	1766	TRUE	reported	WyTNWh	0.166	2	TRUE	6021	0.005782	21.1456	0.000525905
rs1007713	A	G	A	G	0.1897	-0.0664	0.1009	0.2352	FALSE	FALSE	FALSE	oZ7w1z	0.0587	0.2586	outcome	TRUE	reported	textfile	5	79150995	3638	0.04144	4.848e-06	1766	TRUE	reported	WyTNWh	0.1009	2	TRUE	6021	0.00572714	20.9438	0.00354063
rs59866449	G	A	G	A	-0.2747	0.1111	0.0429	0.0612	FALSE	FALSE	FALSE	oZ7w1z	0.1081	0.3042	outcome	TRUE	reported	textfile	12	94556734	3638	0.06079	6.388e-06	1766	TRUE	reported	WyTNWh	0.0429	2	TRUE	6021	0.00558161	20.4086	0.00335119
rs77154655	C	T	C	T	-0.2498	0.0251	0.0524	0.0656	FALSE	FALSE	FALSE	oZ7w1z	0.1041	0.8096	outcome	TRUE	reported	textfile	3	16255245	3638	0.05549	6.943e-06	1766	TRUE	reported	WyTNWh	0.0524	2	TRUE	6021	0.00553962	20.2543	0.00066718
rs11102943	A	G	A	G	-0.1499	-0.0146	0.1682	0.1626	FALSE	FALSE	FALSE	oZ7w1z	0.0667	0.8267	outcome	TRUE	reported	textfile	1	115907459	3638	0.03334	7.187e-06	1766	TRUE	reported	WyTNWh	0.1682	2	TRUE	6021	0.0055259	20.2038	0.00064502
rs4435699	G	C	G	C	0.1151	-0.0681	0.3808	0.3539	FALSE	TRUE	FALSE	oZ7w1z	0.0509	0.1809	outcome	TRUE	reported	textfile	4	164019500	3638	0.02573	7.954e-06	1766	TRUE	reported	WyTNWh	0.3808	2	TRUE	6021	0.00547049	20.0001	0.00678007
rs11176619	T	G	T	G	-0.2677	0.0623	0.0473	0.0272	FALSE	FALSE	FALSE	oZ7w1z	0.1571	0.6915	outcome	TRUE	reported	textfile	12	40829042	3638	0.06021	9.024e-06	1766	TRUE	reported	WyTNWh	0.0473	2	TRUE	6021	0.00540435	19.757	0.00110022
rs75307680	G	T	G	T	0.4013	0.0242	0.0201	0.0723	FALSE	FALSE	FALSE	oZ7w1z	0.1006	0.8098	outcome	TRUE	reported	textfile	2	144289202	3638	0.09042	9.329e-06	1766	TRUE	reported	WyTNWh	0.0201	2	TRUE	6021	0.0053852	19.6866	0.000799282
rs2236073	A	G	A	G	0.2114	0.0807	0.4039	0.5504	FALSE	FALSE	FALSE	tmP2fL	0.0502	0.1077	outcome	TRUE	reported	textfile	6	106898421	1832	0.03543	2.919e-09	1767	TRUE	reported	BnkcYH	0.4039	2	TRUE	6021	0.0190627	35.5626	9.37751e-06
rs783414	G	A	G	A	-0.2432	-0.0414	0.1657	0.917	FALSE	FALSE	FALSE	tmP2fL	0.0886	0.6402	outcome	TRUE	reported	textfile	6	106966701	1832	0.04632	1.699e-07	1767	TRUE	reported	BnkcYH	0.1657	2	TRUE	6021	0.0148244	27.5369	1.30233e-05
rs117218666	T	C	T	C	0.4841	-0.3177	0.0366	0.0174	FALSE	FALSE	FALSE	tmP2fL	0.2645	0.2297	outcome	TRUE	reported	textfile	6	139700367	1832	0.09535	4.234e-07	1767	TRUE	reported	BnkcYH	0.0366	2	TRUE	6021	0.0138751	25.7486	0.000115828
rs117488563	A	G	A	G	-0.7224	-0.2271	0.0147	0.0475	FALSE	FALSE	FALSE	tmP2fL	0.1257	0.07076	outcome	TRUE	reported	textfile	13	29183168	1832	0.1454	7.389e-07	1767	TRUE	reported	BnkcYH	0.0147	2	TRUE	6021	0.013295	24.6577	0.000524375
rs76624974	G	A	G	A	-0.4227	-0.1363	0.0401	0.0425	FALSE	FALSE	FALSE	tmP2fL	0.1481	0.3575	outcome	TRUE	reported	textfile	11	131992482	1832	0.08883	2.105e-06	1767	TRUE	reported	BnkcYH	0.0401	2	TRUE	6021	0.0122091	22.6189	0.0002046
rs150910045	C	T	C	T	0.1655	-0.0451	0.4078	0.248	FALSE	FALSE	FALSE	tmP2fL	0.0567	0.4258	outcome	TRUE	reported	textfile	3	148279147	1832	0.03551	3.384e-06	1767	TRUE	reported	BnkcYH	0.4078	2	TRUE	6021	0.0117179	21.698	0.000225673
rs78409132	C	T	C	T	-0.238	-0.0901	0.128	0.1067	FALSE	FALSE	FALSE	tmP2fL	0.0893	0.3128	outcome	TRUE	reported	textfile	21	16838053	1832	0.05155	4.159e-06	1767	TRUE	reported	BnkcYH	0.128	2	TRUE	6021	0.0115013	21.2923	0.000389339
rs55929002	C	G	C	G	0.2768	-0.0804	0.0936	0.089	FALSE	TRUE	FALSE	tmP2fL	0.1001	0.4219	outcome	TRUE	reported	textfile	6	33963845	1832	0.06026	4.641e-06	1767	TRUE	reported	BnkcYH	0.0936	2	TRUE	6021	0.0113861	21.0766	0.000287712
rs72682699	T	C	T	C	0.3129	0.2899	0.0718	0.0536	FALSE	FALSE	FALSE	tmP2fL	0.119	0.01481	outcome	TRUE	reported	textfile	14	44731074	1832	0.0685	5.265e-06	1767	TRUE	reported	BnkcYH	0.0718	2	TRUE	6021	0.0112612	20.8428	0.00486599
rs4569270	T	A	T	A	-0.2637	-0.0352	0.0988	0.2151	FALSE	TRUE	FALSE	tmP2fL	0.0607	0.5616	outcome	TRUE	reported	textfile	16	82557069	1832	0.05783	5.455e-06	1767	TRUE	reported	BnkcYH	0.0988	2	TRUE	6021	0.0112224	20.7701	0.000211609
rs34396417	C	G	C	G	-0.3454	-0.0199	0.0535	0.0693	FALSE	TRUE	FALSE	tmP2fL	0.1204	0.8688	outcome	TRUE	reported	textfile	2	121363691	1832	0.07579	5.53e-06	1767	TRUE	reported	BnkcYH	0.0535	2	TRUE	6021	0.0112098	20.7466	9.51498e-05
rs16942616	T	C	T	C	-0.4025	0.141	0.0401	0.1165	FALSE	FALSE	FALSE	tmP2fL	0.0766	0.06557	outcome	TRUE	reported	textfile	16	87098993	1832	0.0885	5.767e-06	1767	TRUE	reported	BnkcYH	0.0401	2	TRUE	6021	0.0111646	20.6619	0.00203004
rs58241910	C	T	C	T	-0.2836	-0.0111	0.0898	0.0891	FALSE	FALSE	FALSE	tmP2fL	0.092	0.9039	outcome	TRUE	reported	textfile	20	62864471	1832	0.06257	6.224e-06	1767	TRUE	reported	BnkcYH	0.0898	2	TRUE	6021	0.0110895	20.5213	9.51699e-05
rs75645526	A	G	A	G	0.2308	-0.0528	0.1359	0.1278	FALSE	FALSE	FALSE	tmP2fL	0.0767	0.4909	outcome	TRUE	reported	textfile	16	71565056	1832	0.05094	6.289e-06	1767	TRUE	reported	BnkcYH	0.1359	2	TRUE	6021	0.0110813	20.5059	0.000286697
rs139742955	C	T	C	T	0.4927	0.2768	0.0267	0.0173	FALSE	FALSE	FALSE	tmP2fL	0.2107	0.189	outcome	TRUE	reported	textfile	1	9926086	1832	0.109	6.57e-06	1767	TRUE	reported	BnkcYH	0.0267	2	TRUE	6021	0.0110299	20.4098	0.000913398
rs34534209	C	T	C	T	0.5485	-0.2425	0.0207	0.0375	FALSE	FALSE	FALSE	tmP2fL	0.1433	0.09068	outcome	TRUE	reported	textfile	14	30498909	1832	0.1218	7.153e-06	1767	TRUE	reported	BnkcYH	0.0207	2	TRUE	6021	0.0109484	20.2574	0.00181768
rs1889263	C	T	C	T	-0.4509	-0.1769	0.0287	0.0378	FALSE	FALSE	FALSE	tmP2fL	0.137	0.1964	outcome	TRUE	reported	textfile	3	175401058	1832	0.1007	8.076e-06	1767	TRUE	reported	BnkcYH	0.0287	2	TRUE	6021	0.0108255	20.0275	0.00100278
rs2283164	G	A	G	A	-0.3336	-0.1927	0.0532	0.0634	FALSE	FALSE	FALSE	tmP2fL	0.109	0.07714	outcome	TRUE	reported	textfile	11	2579163	1832	0.07475	8.572e-06	1767	TRUE	reported	BnkcYH	0.0532	2	TRUE	6021	0.0107549	19.8955	0.00231275
rs35851357	A	G	A	G	0.2403	0.1114	0.1179	0.0952	FALSE	FALSE	FALSE	tmP2fL	0.0873	0.2022	outcome	TRUE	reported	textfile	14	88302344	1832	0.05406	9.289e-06	1767	TRUE	reported	BnkcYH	0.1179	2	TRUE	6021	0.0106702	19.737	0.00108046
rs114017670	G	A	G	A	0.3133	0.0492	0.0614	0.057	FALSE	FALSE	FALSE	tmP2fL	0.1102	0.6555	outcome	TRUE	reported	textfile	1	40242025	1832	0.07061	9.657e-06	1767	TRUE	reported	BnkcYH	0.0614	2	TRUE	6021	0.0106321	19.6659	0.000250085
rs1799693	G	A	G	A	-0.2018	-0.0174	0.1714	0.9222	FALSE	FALSE	FALSE	E6Scxb	0.0904	0.8475	outcome	TRUE	reported	textfile	6	106992464	3655	0.03253	6.121e-10	1768	TRUE	reported	Omqbl8	0.1714	2	TRUE	6021	0.0104193	38.4624	1.87598e-06
rs192325628	T	C	T	C	0.4876	-0.1174	0.0164	0.0186	FALSE	FALSE	FALSE	E6Scxb	0.2303	0.6103	outcome	TRUE	reported	textfile	11	121622513	3655	0.09848	7.703e-07	1768	TRUE	reported	Omqbl8	0.0164	2	TRUE	6021	0.00666255	24.5016	0.000333442
rs57680652	T	C	T	C	0.128	-0.0053	0.3596	0.6945	FALSE	FALSE	FALSE	E6Scxb	0.0566	0.9253	outcome	TRUE	reported	textfile	19	16362072	3655	0.02606	9.409e-07	1768	TRUE	reported	Omqbl8	0.3596	2	TRUE	6021	0.00655732	24.112	0.000137585
rs7781145	A	C	A	C	-0.1421	0.0639	0.2397	0.2638	FALSE	FALSE	FALSE	E6Scxb	0.0557	0.2517	outcome	TRUE	reported	textfile	7	23626602	3655	0.0291	1.087e-06	1768	TRUE	reported	Omqbl8	0.2397	2	TRUE	6021	0.00648173	23.8322	0.00167449
rs181036992	C	T	C	T	-0.4375	0.1646	0.0186	0.0327	FALSE	FALSE	FALSE	E6Scxb	0.1761	0.3499	outcome	TRUE	reported	textfile	3	196496410	3655	0.091	1.59e-06	1768	TRUE	reported	Omqbl8	0.0186	2	TRUE	6021	0.00628417	23.1013	0.00130967
rs10056811	A	G	A	G	-0.1322	-0.0083	0.3022	0.35	FALSE	FALSE	FALSE	E6Scxb	0.0516	0.8722	outcome	TRUE	reported	textfile	5	74605220	3655	0.02752	1.618e-06	1768	TRUE	reported	Omqbl8	0.3022	2	TRUE	6021	0.00627401	23.0637	0.000227554
rs16923647	T	C	T	C	-0.164	0.0086	0.1542	0.1336	FALSE	FALSE	FALSE	E6Scxb	0.0713	0.9045	outcome	TRUE	reported	textfile	12	21451395	3655	0.03428	1.786e-06	1768	TRUE	reported	Omqbl8	0.1542	2	TRUE	6021	0.00622311	22.8754	0.000219405
rs9452529	T	C	T	C	-0.5098	-0.0614	0.013	0.1002	FALSE	FALSE	FALSE	E6Scxb	0.0827	0.4578	outcome	TRUE	reported	textfile	6	94734554	3655	0.1073	2.091e-06	1768	TRUE	reported	Omqbl8	0.013	2	TRUE	6021	0.00613817	22.5612	0.00101068
rs59655785	G	A	G	A	0.1174	-0.0323	0.4618	0.3187	FALSE	FALSE	FALSE	E6Scxb	0.0573	0.5735	outcome	TRUE	reported	textfile	2	152494218	3655	0.02474	2.176e-06	1768	TRUE	reported	Omqbl8	0.4618	2	TRUE	6021	0.00612325	22.506	0.000691831
rs6666130	T	G	T	G	-0.2436	0.1273	0.061	0.0417	FALSE	FALSE	FALSE	E6Scxb	0.1369	0.3522	outcome	TRUE	reported	textfile	1	112374026	3655	0.05141	2.25e-06	1768	TRUE	reported	Omqbl8	0.061	2	TRUE	6021	0.00610537	22.4399	0.00156522
rs75059545	C	A	C	A	0.1761	-0.05	0.117	0.1611	FALSE	FALSE	FALSE	E6Scxb	0.067	0.4554	outcome	TRUE	reported	textfile	7	129584738	3655	0.03786	3.391e-06	1768	TRUE	reported	Omqbl8	0.117	2	TRUE	6021	0.00588446	21.6232	0.00134273
rs146379662	T	C	T	C	0.5365	-0.2541	0.0111	0.0203	FALSE	FALSE	FALSE	E6Scxb	0.201	0.2062	outcome	TRUE	reported	textfile	2	240272688	3655	0.1154	3.469e-06	1768	TRUE	reported	Omqbl8	0.0111	2	TRUE	6021	0.00587868	21.6018	0.00389362
rs4368221	C	G	C	G	0.1558	0.0225	0.1544	0.2223	FALSE	TRUE	FALSE	E6Scxb	0.0595	0.7052	outcome	TRUE	reported	textfile	18	45634445	3655	0.03385	4.329e-06	1768	TRUE	reported	Omqbl8	0.1544	2	TRUE	6021	0.00576262	21.1729	0.000687303
rs9326867	G	T	G	T	0.1697	0.0026	0.126	0.1574	FALSE	FALSE	FALSE	E6Scxb	0.0686	0.9699	outcome	TRUE	reported	textfile	5	112302830	3655	0.03713	5.043e-06	1768	TRUE	reported	Omqbl8	0.126	2	TRUE	6021	0.00568266	20.8774	0.000345803
rs10108273	A	T	A	T	0.1701	-0.0804	0.1242	0.1677	FALSE	TRUE	FALSE	E6Scxb	0.0683	0.2393	outcome	TRUE	reported	textfile	8	85737573	3655	0.0373	5.283e-06	1768	TRUE	reported	Omqbl8	0.1242	2	TRUE	6021	0.00565769	20.7852	0.00410033
rs116032501	C	A	C	A	-0.1879	0.1071	0.0992	0.0302	FALSE	FALSE	FALSE	E6Scxb	0.1593	0.5013	outcome	TRUE	reported	textfile	1	55983064	3655	0.04125	5.417e-06	1768	TRUE	reported	Omqbl8	0.0992	2	TRUE	6021	0.00564495	20.7381	0.00149079
rs4765854	C	A	C	A	-0.2274	-0.1016	0.0625	0.1096	FALSE	FALSE	FALSE	E6Scxb	0.0794	0.2004	outcome	TRUE	reported	textfile	12	1997152	3655	0.05027	6.265e-06	1768	TRUE	reported	Omqbl8	0.0625	2	TRUE	6021	0.00556738	20.4515	0.00546115
rs117920360	T	C	T	C	0.1459	-0.0586	0.1718	0.0685	FALSE	FALSE	FALSE	E6Scxb	0.1061	0.5807	outcome	TRUE	reported	textfile	18	58030683	3655	0.03267	8.281e-06	1768	TRUE	reported	Omqbl8	0.1718	2	TRUE	6021	0.00542702	19.9331	0.00147282
rs35093039	A	G	A	G	-0.21	0.1362	0.0755	0.1352	FALSE	FALSE	FALSE	E6Scxb	0.0759	0.07263	outcome	TRUE	reported	textfile	5	24061216	3655	0.04748	9.988e-06	1768	TRUE	reported	Omqbl8	0.0755	2	TRUE	6021	0.00532368	19.5515	0.0171725
rs2236073	A	G	A	G	0.1798	0.0807	0.4004	0.5504	FALSE	FALSE	FALSE	IkuWjc	0.0502	0.1077	outcome	TRUE	reported	textfile	6	106898421	3648	0.02528	1.361e-12	1769	TRUE	reported	XbAs8J	0.4004	2	TRUE	6021	0.013677	50.5577	3.9882e-06
rs1800542	A	G	A	G	-0.4765	-0.1214	0.0158	0.0433	FALSE	FALSE	FALSE	IkuWjc	0.1335	0.3631	outcome	TRUE	reported	textfile	6	12292528	3648	0.09854	1.384e-06	1769	TRUE	reported	XbAs8J	0.0158	2	TRUE	6021	0.006369	23.3702	0.00114167
rs77636548	C	T	C	T	-0.326	-0.0351	0.0345	0.0328	FALSE	FALSE	FALSE	IkuWjc	0.1622	0.8288	outcome	TRUE	reported	textfile	14	43192207	3648	0.06758	1.463e-06	1769	TRUE	reported	XbAs8J	0.0345	2	TRUE	6021	0.00633844	23.2574	0.000243094
rs4784022	T	C	T	C	-0.1354	-0.0152	0.2723	0.6864	FALSE	FALSE	FALSE	IkuWjc	0.0533	0.7758	outcome	TRUE	reported	textfile	16	58051178	3648	0.02815	1.584e-06	1769	TRUE	reported	XbAs8J	0.2723	2	TRUE	6021	0.00630202	23.1229	0.000298955
rs9574429	G	A	G	A	0.1219	0.0116	0.4616	0.4186	FALSE	FALSE	FALSE	IkuWjc	0.0497	0.8154	outcome	TRUE	reported	textfile	13	80035438	3648	0.02536	1.591e-06	1769	TRUE	reported	XbAs8J	0.4616	2	TRUE	6021	0.00629379	23.0925	0.000266859
rs74343204	A	G	A	G	-0.1587	0.1047	0.1771	0.1891	FALSE	FALSE	FALSE	IkuWjc	0.0622	0.09221	outcome	TRUE	reported	textfile	9	4327663	3648	0.03313	1.723e-06	1769	TRUE	reported	XbAs8J	0.1771	2	TRUE	6021	0.00625076	22.9336	0.00610367
rs72829705	T	C	T	C	0.2326	0.016	0.0739	0.0529	FALSE	FALSE	FALSE	IkuWjc	0.1284	0.9007	outcome	TRUE	reported	textfile	6	23390794	3648	0.04895	2.097e-06	1769	TRUE	reported	XbAs8J	0.0739	2	TRUE	6021	0.00615148	22.5671	0.00024344
rs314497	T	G	T	G	0.19	0.048	0.105	0.9317	FALSE	FALSE	FALSE	IkuWjc	0.101	0.6349	outcome	TRUE	reported	textfile	11	115341932	3648	0.0404	2.649e-06	1769	TRUE	reported	XbAs8J	0.105	2	TRUE	6021	0.00602649	22.1058	0.000637051
rs10777201	C	A	C	A	-0.1487	0.0391	0.1948	0.7322	FALSE	FALSE	FALSE	IkuWjc	0.0554	0.48	outcome	TRUE	reported	textfile	12	77884772	3648	0.03162	2.655e-06	1769	TRUE	reported	XbAs8J	0.1948	2	TRUE	6021	0.00602585	22.1034	0.00106201
rs9811806	A	G	A	G	-0.1982	-0.0836	0.0975	0.0469	FALSE	FALSE	FALSE	IkuWjc	0.1304	0.5215	outcome	TRUE	reported	textfile	3	164038932	3648	0.04332	4.924e-06	1769	TRUE	reported	XbAs8J	0.0975	2	TRUE	6021	0.00570546	20.9215	0.00131359
rs113883551	C	T	C	T	0.1339	0.0074	0.237	0.2458	FALSE	FALSE	FALSE	IkuWjc	0.0566	0.8964	outcome	TRUE	reported	textfile	18	24190315	3648	0.02927	4.895e-06	1769	TRUE	reported	XbAs8J	0.237	2	TRUE	6021	0.00570396	20.9159	0.000421981
rs17816653	A	C	A	C	-0.1416	0.0001	0.1933	0.2055	FALSE	FALSE	FALSE	IkuWjc	0.0605	0.9986	outcome	TRUE	reported	textfile	8	1284332	3648	0.03102	5.182e-06	1769	TRUE	reported	XbAs8J	0.1933	2	TRUE	6021	0.00567956	20.8259	0.000321333
rs6073000	C	T	C	T	0.2895	-0.0109	0.041	0.9332	FALSE	FALSE	FALSE	IkuWjc	0.0985	0.9118	outcome	TRUE	reported	textfile	20	41777449	3648	0.06348	5.266e-06	1769	TRUE	reported	XbAs8J	0.041	2	TRUE	6021	0.00566891	20.7867	0.000420084
rs56913504	A	G	A	G	-0.2589	-0.1016	0.0459	0.0721	FALSE	FALSE	FALSE	IkuWjc	0.0986	0.3031	outcome	TRUE	reported	textfile	20	52133353	3648	0.05728	6.389e-06	1769	TRUE	reported	XbAs8J	0.0459	2	TRUE	6021	0.00556901	20.4183	0.00338565
rs2173295	C	A	C	A	0.2059	0.1244	0.0799	0.1387	FALSE	FALSE	FALSE	IkuWjc	0.0728	0.08764	outcome	TRUE	reported	textfile	1	54943264	3648	0.04591	7.539e-06	1769	TRUE	reported	XbAs8J	0.0799	2	TRUE	6021	0.00548347	20.103	0.0129095
rs10925304	T	C	T	C	0.121	-0.015	0.2862	0.2879	FALSE	FALSE	FALSE	IkuWjc	0.0571	0.7926	outcome	TRUE	reported	textfile	1	237235986	3648	0.02722	9.019e-06	1769	TRUE	reported	XbAs8J	0.2862	2	TRUE	6021	0.00538758	19.7495	0.000828503
rs4808045	T	C	T	C	0.1255	0.064	0.2622	0.7382	FALSE	FALSE	FALSE	IkuWjc	0.0569	0.2601	outcome	TRUE	reported	textfile	19	16423035	3648	0.02836	9.971e-06	1769	TRUE	reported	XbAs8J	0.2622	2	TRUE	6021	0.00533943	19.5721	0.00514297
rs2236073	A	G	A	G	0.1758	0.0807	0.4005	0.5504	FALSE	FALSE	FALSE	u5YjBN	0.0502	0.1077	outcome	TRUE	reported	textfile	6	106898421	3649	0.02511	2.964e-12	1770	TRUE	reported	l7XBCQ	0.4005	2	TRUE	6021	0.0132549	48.9899	6.05323e-06
rs783418	C	G	C	G	-0.2057	0.0234	0.1661	0.0826	FALSE	TRUE	FALSE	u5YjBN	0.0894	0.7936	outcome	TRUE	reported	textfile	6	106962679	3649	0.03306	5.438e-10	1770	TRUE	reported	l7XBCQ	0.1661	2	TRUE	6021	0.010498	38.6923	2.13826e-06
rs12930821	C	G	C	G	-0.1566	0.0172	0.2408	0.2938	FALSE	TRUE	FALSE	u5YjBN	0.0545	0.752	outcome	TRUE	reported	textfile	16	58054671	3649	0.02914	8.205e-08	1770	TRUE	reported	l7XBCQ	0.2408	2	TRUE	6021	0.00785248	28.8647	5.32623e-05
rs35629713	A	C	A	C	0.3684	-0.0955	0.0288	0.0615	FALSE	FALSE	FALSE	u5YjBN	0.1052	0.3637	outcome	TRUE	reported	textfile	2	156376531	3649	0.07227	3.621e-07	1770	TRUE	reported	l7XBCQ	0.0288	2	TRUE	6021	0.00707078	25.9708	0.000540627
rs12642193	G	A	G	A	-0.168	0.084	0.1576	0.2644	FALSE	FALSE	FALSE	u5YjBN	0.0559	0.1331	outcome	TRUE	reported	textfile	4	25916457	3649	0.0337	6.47e-07	1770	TRUE	reported	l7XBCQ	0.1576	2	TRUE	6021	0.00676452	24.8382	0.00264636
rs61820496	A	G	A	G	-0.2216	0.0705	0.0836	0.0577	FALSE	FALSE	FALSE	u5YjBN	0.1082	0.5146	outcome	TRUE	reported	textfile	1	158541235	3649	0.04504	9.046e-07	1770	TRUE	reported	l7XBCQ	0.0836	2	TRUE	6021	0.00659018	24.1938	0.000505966
rs61969021	C	T	C	T	0.1267	0.0042	0.3215	0.1869	FALSE	FALSE	FALSE	u5YjBN	0.0662	0.949	outcome	TRUE	reported	textfile	13	80019033	3649	0.02653	1.85e-06	1770	TRUE	reported	l7XBCQ	0.3215	2	TRUE	6021	0.00621153	22.7951	0.000195113
rs147397792	G	T	G	T	0.2105	-0.0689	0.0908	0.0401	FALSE	FALSE	FALSE	u5YjBN	0.139	0.6201	outcome	TRUE	reported	textfile	10	18427081	3649	0.04421	2.004e-06	1770	TRUE	reported	l7XBCQ	0.0908	2	TRUE	6021	0.00617447	22.6582	0.000563716
rs6561591	C	T	C	T	-0.1184	-0.0428	0.449	0.5807	FALSE	FALSE	FALSE	u5YjBN	0.0506	0.3974	outcome	TRUE	reported	textfile	13	51367125	3649	0.02497	2.203e-06	1770	TRUE	reported	l7XBCQ	0.449	2	TRUE	6021	0.00612385	22.4713	0.00129104
rs1363793	A	G	A	G	-0.1362	0.0026	0.2469	0.8292	FALSE	FALSE	FALSE	u5YjBN	0.0655	0.9686	outcome	TRUE	reported	textfile	5	56874434	3649	0.02875	2.249e-06	1770	TRUE	reported	l7XBCQ	0.2469	2	TRUE	6021	0.00611282	22.4306	0.00020751
rs7606151	C	A	C	A	0.1171	0.0176	0.4975	0.3851	FALSE	FALSE	FALSE	u5YjBN	0.0526	0.7384	outcome	TRUE	reported	textfile	2	88835687	3649	0.02513	3.293e-06	1770	TRUE	reported	l7XBCQ	0.4975	2	TRUE	6021	0.00591532	21.7015	0.000525305
rs117417471	G	A	G	A	-0.2819	0.0557	0.0437	0.0524	FALSE	FALSE	FALSE	u5YjBN	0.1176	0.6358	outcome	TRUE	reported	textfile	10	56973794	3649	0.061	3.942e-06	1770	TRUE	reported	l7XBCQ	0.0437	2	TRUE	6021	0.00581865	21.3448	0.000802702
rs142131620	T	C	T	C	-0.1626	-0.2026	0.1439	0.1195	FALSE	FALSE	FALSE	u5YjBN	0.085	0.01714	outcome	TRUE	reported	textfile	6	167883703	3649	0.03562	5.171e-06	1770	TRUE	reported	l7XBCQ	0.1439	2	TRUE	6021	0.00567814	20.8264	0.0327889
rs7532008	C	A	C	A	0.1141	-0.0346	0.4531	0.3091	FALSE	FALSE	FALSE	u5YjBN	0.0536	0.5181	outcome	TRUE	reported	textfile	1	150960350	3649	0.02516	5.902e-06	1770	TRUE	reported	l7XBCQ	0.4531	2	TRUE	6021	0.00560448	20.5547	0.00148104
rs10777178	C	T	C	T	-0.131	-0.0079	0.2572	0.6818	FALSE	FALSE	FALSE	u5YjBN	0.0518	0.879	outcome	TRUE	reported	textfile	12	89906229	3649	0.0289	5.953e-06	1770	TRUE	reported	l7XBCQ	0.2572	2	TRUE	6021	0.00559931	20.5357	0.000502333
rs77636548	C	T	C	T	-0.3035	-0.0351	0.0345	0.0328	FALSE	FALSE	FALSE	u5YjBN	0.1622	0.8288	outcome	TRUE	reported	textfile	14	43192207	3649	0.06696	6.029e-06	1770	TRUE	reported	l7XBCQ	0.0345	2	TRUE	6021	0.00559853	20.5328	0.000581667
rs2195378	T	A	T	A	0.1472	0.0514	0.1837	0.233	FALSE	TRUE	FALSE	u5YjBN	0.0588	0.382	outcome	TRUE	reported	textfile	5	113016646	3649	0.03271	6.969e-06	1770	TRUE	reported	l7XBCQ	0.1837	2	TRUE	6021	0.00551921	20.2403	0.00260765
rs59949425	C	A	C	A	0.3167	0.0732	0.033	0.0518	FALSE	FALSE	FALSE	u5YjBN	0.131	0.5762	outcome	TRUE	reported	textfile	5	173621497	3649	0.0704	7.037e-06	1770	TRUE	reported	l7XBCQ	0.033	2	TRUE	6021	0.00551537	20.2261	0.00136
rs12607352	T	G	T	G	-0.1375	-0.0107	0.2105	0.8085	FALSE	FALSE	FALSE	u5YjBN	0.0629	0.865	outcome	TRUE	reported	textfile	18	46732381	3649	0.03064	7.436e-06	1770	TRUE	reported	l7XBCQ	0.2105	2	TRUE	6021	0.00548863	20.1275	0.000596775
rs2236073	A	G	A	G	0.1799	0.0807	0.4004	0.5504	FALSE	FALSE	FALSE	FhCTLp	0.0502	0.1077	outcome	TRUE	reported	textfile	6	106898421	3653	0.0249	5.998e-13	1771	TRUE	reported	i39eML	0.4004	2	TRUE	6021	0.0140881	52.1706	2.62311e-06
rs4862454	A	G	A	G	-0.139	-0.0289	0.2982	0.3714	FALSE	FALSE	FALSE	FhCTLp	0.0652	0.6573	outcome	TRUE	reported	textfile	4	185816062	3653	0.02729	3.672e-07	1771	TRUE	reported	i39eML	0.2982	2	TRUE	6021	0.00705179	25.9289	0.000183343
rs4942468	A	C	A	C	-0.1334	-0.0401	0.3188	0.7202	FALSE	FALSE	FALSE	FhCTLp	0.0553	0.4678	outcome	TRUE	reported	textfile	13	46618290	3653	0.0263	4.118e-07	1771	TRUE	reported	i39eML	0.3188	2	TRUE	6021	0.00699363	25.7136	0.00038365
rs12930821	C	G	C	G	-0.1445	0.0172	0.2408	0.2938	FALSE	TRUE	FALSE	FhCTLp	0.0545	0.752	outcome	TRUE	reported	textfile	16	58054671	3653	0.02896	6.334e-07	1771	TRUE	reported	i39eML	0.2408	2	TRUE	6021	0.00676923	24.8829	0.00018567
rs12200293	A	C	A	C	-0.2916	0.1168	0.0463	0.1034	FALSE	FALSE	FALSE	FhCTLp	0.0814	0.1514	outcome	TRUE	reported	textfile	6	101259222	3653	0.05906	8.286e-07	1771	TRUE	reported	i39eML	0.0463	2	TRUE	6021	0.00662903	24.3641	0.00262095
rs6561591	C	T	C	T	-0.1204	-0.0428	0.4489	0.5807	FALSE	FALSE	FALSE	FhCTLp	0.0506	0.3974	outcome	TRUE	reported	textfile	13	51367125	3653	0.02477	1.223e-06	1771	TRUE	reported	i39eML	0.4489	2	TRUE	6021	0.00642616	23.6136	0.000930897
rs7153153	A	T	A	T	0.1517	-0.065	0.1852	0.2071	FALSE	TRUE	FALSE	FhCTLp	0.0605	0.2825	outcome	TRUE	reported	textfile	14	89049488	3653	0.03183	1.954e-06	1771	TRUE	reported	i39eML	0.1852	2	TRUE	6021	0.00617954	22.7018	0.00196351
rs7246669	G	A	G	A	0.1299	0.0482	0.2716	0.7642	FALSE	FALSE	FALSE	FhCTLp	0.0581	0.4071	outcome	TRUE	reported	textfile	19	16442023	3653	0.02766	2.728e-06	1771	TRUE	reported	i39eML	0.2716	2	TRUE	6021	0.00600137	22.0433	0.00141629
rs7705021	G	A	G	A	0.1904	-0.054	0.1005	0.2343	FALSE	FALSE	FALSE	FhCTLp	0.0582	0.3536	outcome	TRUE	reported	textfile	5	79153359	3653	0.04084	3.238e-06	1771	TRUE	reported	i39eML	0.1005	2	TRUE	6021	0.00591475	21.7232	0.0019089
rs117084919	G	T	G	T	0.403	-0.1427	0.0219	0.0309	FALSE	FALSE	FALSE	FhCTLp	0.1664	0.3909	outcome	TRUE	reported	textfile	13	112826783	3653	0.08668	3.446e-06	1771	TRUE	reported	i39eML	0.0219	2	TRUE	6021	0.00588248	21.604	0.00170604
rs192325628	T	C	T	C	0.4523	-0.1174	0.0164	0.0186	FALSE	FALSE	FALSE	FhCTLp	0.2303	0.6103	outcome	TRUE	reported	textfile	11	121622513	3653	0.0984	4.452e-06	1771	TRUE	reported	i39eML	0.0164	2	TRUE	6021	0.00575054	21.1167	0.00093518
rs9392365	T	A	T	A	-0.1437	-0.0549	0.1856	0.2093	FALSE	TRUE	FALSE	FhCTLp	0.0613	0.3709	outcome	TRUE	reported	textfile	6	2091975	3653	0.03134	4.645e-06	1771	TRUE	reported	i39eML	0.1856	2	TRUE	6021	0.00572234	21.0125	0.00218859
rs11023691	C	A	C	A	0.1134	-0.0511	0.4442	0.5538	FALSE	FALSE	FALSE	FhCTLp	0.0495	0.3016	outcome	TRUE	reported	textfile	11	15732077	3653	0.02502	6.003e-06	1771	TRUE	reported	i39eML	0.4442	2	TRUE	6021	0.00559199	20.5312	0.00330525
rs144371214	A	T	A	T	0.5084	-0.1323	0.0126	0.0212	FALSE	TRUE	FALSE	FhCTLp	0.192	0.4909	outcome	TRUE	reported	textfile	14	88425584	3653	0.1123	6.2e-06	1771	TRUE	reported	i39eML	0.0126	2	TRUE	6021	0.0055792	20.484	0.00166312
rs9390863	A	C	A	C	0.2234	-0.1748	0.0653	0.0314	FALSE	FALSE	FALSE	FhCTLp	0.1496	0.2425	outcome	TRUE	reported	textfile	6	96559132	3653	0.04959	6.858e-06	1771	TRUE	reported	i39eML	0.0653	2	TRUE	6021	0.00552487	20.2834	0.00461687
rs78023498	T	G	T	G	-0.2073	-0.0483	0.0749	0.1163	FALSE	FALSE	FALSE	FhCTLp	0.0787	0.5397	outcome	TRUE	reported	textfile	4	189754606	3653	0.04624	7.583e-06	1771	TRUE	reported	i39eML	0.0749	2	TRUE	6021	0.0054718	20.0875	0.0015981
rs7078071	A	G	A	G	0.2026	-0.0458	0.0803	0.0682	FALSE	FALSE	FALSE	FhCTLp	0.0965	0.6347	outcome	TRUE	reported	textfile	10	124038072	3653	0.0453	7.922e-06	1771	TRUE	reported	i39eML	0.0803	2	TRUE	6021	0.00544579	19.9915	0.00122377
rs150394154	A	G	A	G	0.1485	-0.0607	0.2805	0.1273	FALSE	FALSE	FALSE	FhCTLp	0.0789	0.442	outcome	TRUE	reported	textfile	6	32556019	3653	0.0334	8.989e-06	1771	TRUE	reported	i39eML	0.2805	2	TRUE	6021	0.00538228	19.7571	0.00243319
rs4911068	G	A	G	A	0.1143	0.0488	0.3767	0.4017	FALSE	FALSE	FALSE	FhCTLp	0.0497	0.3261	outcome	TRUE	reported	textfile	13	85904508	3653	0.02574	9.285e-06	1771	TRUE	reported	i39eML	0.3767	2	TRUE	6021	0.00536893	19.7078	0.0037726
rs55976703	T	C	T	C	-0.1566	-0.0857	0.1432	0.1768	FALSE	FALSE	FALSE	FhCTLp	0.0659	0.1931	outcome	TRUE	reported	textfile	19	35785378	3653	0.0353	9.38e-06	1771	TRUE	reported	i39eML	0.1432	2	TRUE	6021	0.0053586	19.6696	0.00698637
rs117417471	G	A	G	A	-0.2681	0.0557	0.0438	0.0524	FALSE	FALSE	FALSE	FhCTLp	0.1176	0.6358	outcome	TRUE	reported	textfile	10	56973794	3653	0.06057	9.853e-06	1771	TRUE	reported	i39eML	0.0438	2	TRUE	6021	0.00533465	19.5813	0.0013858
rs2236073	A	G	A	G	0.1623	0.0807	0.4003	0.5504	FALSE	FALSE	FALSE	rPhc2u	0.0502	0.1077	outcome	TRUE	reported	textfile	6	106898421	3655	0.02499	9.313e-11	1772	TRUE	reported	hoaBls	0.4003	2	TRUE	6021	0.0114086	42.1567	3.70406e-05
rs783418	C	G	C	G	-0.1727	0.0234	0.1662	0.0826	FALSE	TRUE	FALSE	rPhc2u	0.0894	0.7936	outcome	TRUE	reported	textfile	6	106962679	3655	0.03293	1.639e-07	1772	TRUE	reported	hoaBls	0.1662	2	TRUE	6021	0.00746892	27.4893	7.16658e-05
rs4862454	A	G	A	G	-0.1417	-0.0289	0.2981	0.3714	FALSE	FALSE	FALSE	rPhc2u	0.0652	0.6573	outcome	TRUE	reported	textfile	4	185816062	3655	0.02733	2.27e-07	1772	TRUE	reported	hoaBls	0.2981	2	TRUE	6021	0.00730114	26.8672	0.000137705
rs9916833	T	C	T	C	0.1791	0.0563	0.1343	0.1644	FALSE	FALSE	FALSE	rPhc2u	0.0666	0.398	outcome	TRUE	reported	textfile	17	64969001	3655	0.03582	5.948e-07	1772	TRUE	reported	hoaBls	0.1343	2	TRUE	6021	0.00679348	24.9863	0.000626337
rs7153153	A	T	A	T	0.1555	-0.065	0.1851	0.2071	FALSE	TRUE	FALSE	rPhc2u	0.0605	0.2825	outcome	TRUE	reported	textfile	14	89049488	3655	0.03189	1.126e-06	1772	TRUE	reported	hoaBls	0.1851	2	TRUE	6021	0.00646321	23.7637	0.00146343
rs6068718	C	T	C	T	-0.1444	0.1357	0.2241	0.1675	FALSE	FALSE	FALSE	rPhc2u	0.0723	0.06054	outcome	TRUE	reported	textfile	20	52528229	3655	0.02985	1.378e-06	1772	TRUE	reported	hoaBls	0.2241	2	TRUE	6021	0.0063619	23.3888	0.00785063
rs9480626	C	A	C	A	-0.1202	0.0035	0.3945	0.2867	FALSE	FALSE	FALSE	rPhc2u	0.0579	0.9517	outcome	TRUE	reported	textfile	6	106415916	3655	0.02519	1.893e-06	1772	TRUE	reported	hoaBls	0.3945	2	TRUE	6021	0.0061911	22.757	0.000197039
rs12930821	C	G	C	G	-0.1357	0.0172	0.2408	0.2938	FALSE	TRUE	FALSE	rPhc2u	0.0545	0.752	outcome	TRUE	reported	textfile	16	58054671	3655	0.02902	3.032e-06	1772	TRUE	reported	hoaBls	0.2408	2	TRUE	6021	0.00594685	21.8538	0.000481611
rs74273424	G	A	G	A	-0.321	0.1468	0.0321	0.043	FALSE	FALSE	FALSE	rPhc2u	0.1297	0.2577	outcome	TRUE	reported	textfile	20	46848498	3655	0.06942	3.876e-06	1772	TRUE	reported	hoaBls	0.0321	2	TRUE	6021	0.00581594	21.3699	0.0031954
rs77636548	C	T	C	T	-0.3067	-0.0351	0.0345	0.0328	FALSE	FALSE	FALSE	rPhc2u	0.1622	0.8288	outcome	TRUE	reported	textfile	14	43192207	3655	0.06672	4.422e-06	1772	TRUE	reported	hoaBls	0.0345	2	TRUE	6021	0.0057481	21.1192	0.000484108
rs117772689	G	T	G	T	-0.3796	-0.0026	0.0222	0.0231	FALSE	FALSE	FALSE	rPhc2u	0.2027	0.9899	outcome	TRUE	reported	textfile	20	40633066	3655	0.08267	4.555e-06	1772	TRUE	reported	hoaBls	0.0222	2	TRUE	6021	0.0057355	21.0726	0.000305604
rs7835717	T	C	T	C	-0.5035	-0.0283	0.0114	0.0411	FALSE	FALSE	FALSE	rPhc2u	0.1248	0.8205	outcome	TRUE	reported	textfile	8	134992585	3655	0.1114	6.363e-06	1772	TRUE	reported	hoaBls	0.0114	2	TRUE	6021	0.00555803	20.4169	0.000620689
rs16877254	G	A	G	A	0.3385	0.2518	0.028	0.0301	FALSE	FALSE	FALSE	rPhc2u	0.1591	0.1135	outcome	TRUE	reported	textfile	5	79139144	3655	0.0751	6.778e-06	1772	TRUE	reported	hoaBls	0.028	2	TRUE	6021	0.00552768	20.3048	0.00989378
rs11661274	C	T	C	T	0.1633	0.1595	0.1349	0.0885	FALSE	FALSE	FALSE	rPhc2u	0.0878	0.06933	outcome	TRUE	reported	textfile	18	53832059	3655	0.03627	6.938e-06	1772	TRUE	reported	hoaBls	0.1349	2	TRUE	6021	0.00551554	20.26	0.0150215
rs112878393	A	G	A	G	0.2119	0.0144	0.078	0.1066	FALSE	FALSE	FALSE	rPhc2u	0.0844	0.8642	outcome	TRUE	reported	textfile	3	125610212	3655	0.04717	7.297e-06	1772	TRUE	reported	hoaBls	0.078	2	TRUE	6021	0.005491	20.1694	0.000591921
rs61969021	C	T	C	T	0.1179	0.0042	0.3218	0.1869	FALSE	FALSE	FALSE	rPhc2u	0.0662	0.949	outcome	TRUE	reported	textfile	13	80019033	3655	0.02642	8.408e-06	1772	TRUE	reported	hoaBls	0.3218	2	TRUE	6021	0.00541895	19.9033	0.000505628
rs34872621	C	T	C	T	0.1365	-0.0578	0.2053	0.1711	FALSE	FALSE	FALSE	rPhc2u	0.0671	0.389	outcome	TRUE	reported	textfile	8	120710403	3655	0.03087	9.978e-06	1772	TRUE	reported	hoaBls	0.2053	2	TRUE	6021	0.00532093	19.5413	0.00312298
rs2236073	A	G	A	G	0.1709	0.0807	0.4003	0.5504	FALSE	FALSE	FALSE	dVBPNA	0.0502	0.1077	outcome	TRUE	reported	textfile	6	106898421	3652	0.02524	1.458e-11	1773	TRUE	reported	beM9n3	0.4003	2	TRUE	6021	0.0123981	45.8213	1.40556e-05
rs783418	C	G	C	G	-0.1791	0.0234	0.1662	0.0826	FALSE	TRUE	FALSE	dVBPNA	0.0894	0.7936	outcome	TRUE	reported	textfile	6	106962679	3652	0.03324	7.614e-08	1773	TRUE	reported	beM9n3	0.1662	2	TRUE	6021	0.00788678	29.0156	4.4222e-05
rs6073000	C	T	C	T	0.3159	-0.0109	0.0411	0.9332	FALSE	FALSE	FALSE	dVBPNA	0.0985	0.9118	outcome	TRUE	reported	textfile	20	41777449	3652	0.06318	5.991e-07	1773	TRUE	reported	beM9n3	0.0411	2	TRUE	6021	0.00679902	24.9863	0.000107938
rs8046913	A	T	A	T	-0.1437	0.0137	0.251	0.3064	FALSE	TRUE	FALSE	dVBPNA	0.0536	0.7988	outcome	TRUE	reported	textfile	16	58039513	3652	0.02904	7.849e-07	1773	TRUE	reported	beM9n3	0.251	2	TRUE	6021	0.0066602	24.4727	0.000182295
rs61820496	A	G	A	G	-0.2177	0.0705	0.0835	0.0577	FALSE	FALSE	FALSE	dVBPNA	0.1082	0.5146	outcome	TRUE	reported	textfile	1	158541235	3652	0.04528	1.588e-06	1773	TRUE	reported	beM9n3	0.0835	2	TRUE	6021	0.00628974	23.1029	0.000702397
rs10750479	C	G	C	G	-0.147	-0.0946	0.204	0.2437	FALSE	TRUE	FALSE	dVBPNA	0.061	0.1208	outcome	TRUE	reported	textfile	11	131277609	3652	0.03065	1.696e-06	1773	TRUE	reported	beM9n3	0.204	2	TRUE	6021	0.00625916	22.9898	0.00469865
rs77636548	C	T	C	T	-0.3169	-0.0351	0.0345	0.0328	FALSE	FALSE	FALSE	dVBPNA	0.1622	0.8288	outcome	TRUE	reported	textfile	14	43192207	3652	0.06732	2.599e-06	1773	TRUE	reported	beM9n3	0.0345	2	TRUE	6021	0.00603112	22.1472	0.000347636
rs6799202	T	G	T	G	-0.229	-0.1115	0.0709	0.8154	FALSE	FALSE	FALSE	dVBPNA	0.0596	0.06135	outcome	TRUE	reported	textfile	3	131412454	3652	0.04894	2.994e-06	1773	TRUE	reported	beM9n3	0.0709	2	TRUE	6021	0.00595959	21.8829	0.0111316
rs147397792	G	T	G	T	0.2079	-0.0689	0.091	0.0401	FALSE	FALSE	FALSE	dVBPNA	0.139	0.6201	outcome	TRUE	reported	textfile	10	18427081	3652	0.04446	3.036e-06	1773	TRUE	reported	beM9n3	0.091	2	TRUE	6021	0.00595178	21.8541	0.000722781
rs6561591	C	T	C	T	-0.117	-0.0428	0.4491	0.5807	FALSE	FALSE	FALSE	dVBPNA	0.0506	0.3974	outcome	TRUE	reported	textfile	13	51367125	3652	0.02509	3.216e-06	1773	TRUE	reported	beM9n3	0.4491	2	TRUE	6021	0.00591918	21.7336	0.00160207
rs17035466	T	C	T	C	0.1183	0.0015	0.3888	0.3981	FALSE	FALSE	FALSE	dVBPNA	0.0501	0.9763	outcome	TRUE	reported	textfile	3	1249656	3652	0.02559	3.915e-06	1773	TRUE	reported	beM9n3	0.3888	2	TRUE	6021	0.00581787	21.3595	0.000288903
rs117896078	T	A	T	A	-0.3455	0.0285	0.0285	0.0197	FALSE	TRUE	FALSE	dVBPNA	0.2136	0.8937	outcome	TRUE	reported	textfile	9	130751060	3652	0.07496	4.197e-06	1773	TRUE	reported	beM9n3	0.0285	2	TRUE	6021	0.00578345	21.2324	0.000384293
rs12642193	G	A	G	A	-0.155	0.084	0.1574	0.2644	FALSE	FALSE	FALSE	dVBPNA	0.0559	0.1331	outcome	TRUE	reported	textfile	4	25916457	3652	0.03388	4.964e-06	1773	TRUE	reported	beM9n3	0.1574	2	TRUE	6021	0.00569854	20.9189	0.00730412
rs10125165	G	A	G	A	0.2274	0.064	0.0659	0.1276	FALSE	FALSE	FALSE	dVBPNA	0.0744	0.3895	outcome	TRUE	reported	textfile	9	33093991	3652	0.05015	5.988e-06	1773	TRUE	reported	beM9n3	0.0659	2	TRUE	6021	0.00559848	20.5495	0.00232389
rs9838297	C	T	C	T	0.5111	0.0223	0.0118	0.0499	FALSE	FALSE	FALSE	dVBPNA	0.1157	0.8473	outcome	TRUE	reported	textfile	3	150777263	3652	0.1133	6.635e-06	1773	TRUE	reported	beM9n3	0.0118	2	TRUE	6021	0.00554125	20.3383	0.000588112
rs9574429	G	A	G	A	0.114	0.0116	0.4611	0.4186	FALSE	FALSE	FALSE	dVBPNA	0.0497	0.8154	outcome	TRUE	reported	textfile	13	80035438	3652	0.02531	6.825e-06	1773	TRUE	reported	beM9n3	0.4611	2	TRUE	6021	0.00552445	20.2762	0.000657669
rs71419048	A	T	A	T	0.3303	-0.0754	0.0285	0.0612	FALSE	TRUE	FALSE	dVBPNA	0.1057	0.4756	outcome	TRUE	reported	textfile	2	156299791	3652	0.07352	7.235e-06	1773	TRUE	reported	beM9n3	0.0285	2	TRUE	6021	0.00549644	20.1729	0.00191722
rs2872004	T	C	T	C	-0.1571	-0.0049	0.1464	0.8576	FALSE	FALSE	FALSE	dVBPNA	0.0711	0.9451	outcome	TRUE	reported	textfile	4	131805665	3652	0.03497	7.274e-06	1773	TRUE	reported	beM9n3	0.1464	2	TRUE	6021	0.00549588	20.1708	0.000467943
rs73251366	G	A	G	A	-0.2063	-0.1928	0.0809	0.1222	FALSE	FALSE	FALSE	dVBPNA	0.0782	0.01365	outcome	TRUE	reported	textfile	13	83905396	3652	0.04624	8.357e-06	1773	TRUE	reported	beM9n3	0.0809	2	TRUE	6021	0.0054209	19.8941	0.0452729
rs4808045	T	C	T	C	0.1258	0.064	0.2619	0.7382	FALSE	FALSE	FALSE	dVBPNA	0.0569	0.2601	outcome	TRUE	reported	textfile	19	16423035	3652	0.02829	9.029e-06	1773	TRUE	reported	beM9n3	0.2619	2	TRUE	6021	0.00538542	19.7632	0.00489377
rs4629120	T	C	T	C	0.1124	0.0716	0.4085	0.3453	FALSE	FALSE	FALSE	dVBPNA	0.0509	0.1593	outcome	TRUE	reported	textfile	2	30045059	3652	0.02529	9.069e-06	1773	TRUE	reported	beM9n3	0.4085	2	TRUE	6021	0.00537974	19.7423	0.00831675
rs7214354	G	A	G	A	0.2204	-0.0375	0.0686	0.8844	FALSE	FALSE	FALSE	dVBPNA	0.078	0.6307	outcome	TRUE	reported	textfile	17	51813250	3652	0.04959	9.03e-06	1773	TRUE	reported	beM9n3	0.0686	2	TRUE	6021	0.00537974	19.7423	0.00133798
rs11660990	C	T	C	T	-0.1209	-0.0186	0.3042	0.3473	FALSE	FALSE	FALSE	dVBPNA	0.0515	0.7182	outcome	TRUE	reported	textfile	18	50763049	3652	0.02726	9.396e-06	1773	TRUE	reported	beM9n3	0.3042	2	TRUE	6021	0.00535719	19.6591	0.00106109
rs57225931	T	C	T	C	-0.1396	-0.0434	0.1921	0.2306	FALSE	FALSE	FALSE	dVBPNA	0.0596	0.4669	outcome	TRUE	reported	textfile	7	152228997	3652	0.03151	9.677e-06	1773	TRUE	reported	beM9n3	0.1921	2	TRUE	6021	0.00534583	19.6172	0.00232978
rs55846017	A	G	A	G	-0.1943	-0.0454	0.1175	0.1513	FALSE	FALSE	FALSE	aJ4JgP	0.069	0.51	outcome	TRUE	reported	textfile	6	106902438	3656	0.03864	5.183e-07	1774	TRUE	reported	BAaqPa	0.1175	2	TRUE	6021	0.00686866	25.2717	0.0003748
rs17778282	T	G	T	G	0.5834	-0.0692	0.0107	0.0415	FALSE	FALSE	FALSE	aJ4JgP	0.1336	0.6045	outcome	TRUE	reported	textfile	4	2947538	3656	0.1197	1.137e-06	1774	TRUE	reported	BAaqPa	0.0107	2	TRUE	6021	0.00645544	23.7414	0.000428767
rs35378339	C	G	C	G	0.1293	0.0149	0.2779	0.2163	FALSE	TRUE	FALSE	aJ4JgP	0.062	0.8099	outcome	TRUE	reported	textfile	1	32639057	3656	0.02712	1.942e-06	1774	TRUE	reported	BAaqPa	0.2779	2	TRUE	6021	0.00617902	22.7185	0.00030753
rs783418	C	G	C	G	-0.1551	0.0234	0.1662	0.0826	FALSE	TRUE	FALSE	aJ4JgP	0.0894	0.7936	outcome	TRUE	reported	textfile	6	106962679	3656	0.03261	2.042e-06	1774	TRUE	reported	BAaqPa	0.1662	2	TRUE	6021	0.00614946	22.6092	0.000334922
rs140315354	A	G	A	G	0.1704	0.0615	0.1355	0.0748	FALSE	FALSE	FALSE	aJ4JgP	0.0961	0.522	outcome	TRUE	reported	textfile	1	161617673	3656	0.03602	2.316e-06	1774	TRUE	reported	BAaqPa	0.1355	2	TRUE	6021	0.00608408	22.3673	0.000855467
rs17709988	C	G	C	G	0.1687	0.0647	0.1369	0.0989	FALSE	TRUE	FALSE	aJ4JgP	0.0852	0.4479	outcome	TRUE	reported	textfile	9	14420767	3656	0.03614	3.148e-06	1774	TRUE	reported	BAaqPa	0.1369	2	TRUE	6021	0.00592471	21.7779	0.00132062
rs10491456	A	G	A	G	0.1886	-0.0569	0.1011	0.2351	FALSE	FALSE	FALSE	aJ4JgP	0.0583	0.329	outcome	TRUE	reported	textfile	5	79152076	3656	0.04063	3.582e-06	1774	TRUE	reported	BAaqPa	0.1011	2	TRUE	6021	0.00585911	21.5354	0.00222923
rs117772689	G	T	G	T	-0.3828	-0.0026	0.0222	0.0231	FALSE	FALSE	FALSE	aJ4JgP	0.2027	0.9899	outcome	TRUE	reported	textfile	20	40633066	3656	0.08249	3.594e-06	1774	TRUE	reported	BAaqPa	0.0222	2	TRUE	6021	0.00585578	21.523	0.000263566
rs192325628	T	C	T	C	0.4478	-0.1174	0.0164	0.0186	FALSE	FALSE	FALSE	aJ4JgP	0.2303	0.6103	outcome	TRUE	reported	textfile	11	121622513	3656	0.0979	4.942e-06	1774	TRUE	reported	BAaqPa	0.0164	2	TRUE	6021	0.00569008	20.9105	0.000998289
rs9390863	A	C	A	C	0.2243	-0.1748	0.0652	0.0314	FALSE	FALSE	FALSE	aJ4JgP	0.1496	0.2425	outcome	TRUE	reported	textfile	6	96559132	3656	0.04928	5.494e-06	1774	TRUE	reported	BAaqPa	0.0652	2	TRUE	6021	0.00563452	20.7052	0.00412372
rs10245878	G	A	G	A	-0.1437	-0.0248	0.1778	0.2108	FALSE	FALSE	FALSE	aJ4JgP	0.0608	0.683	outcome	TRUE	reported	textfile	7	78032692	3656	0.03196	7.13e-06	1774	TRUE	reported	BAaqPa	0.1778	2	TRUE	6021	0.00549919	20.2052	0.00099331
rs116100555	A	G	A	G	0.1487	0.0344	0.1674	0.0638	FALSE	FALSE	FALSE	aJ4JgP	0.1095	0.7537	outcome	TRUE	reported	textfile	2	7324854	3656	0.03313	7.423e-06	1774	TRUE	reported	BAaqPa	0.1674	2	TRUE	6021	0.00548007	20.1345	0.000826292
rs76224749	T	C	T	C	-0.2563	0.0247	0.0458	0.0273	FALSE	FALSE	FALSE	aJ4JgP	0.1647	0.8809	outcome	TRUE	reported	textfile	1	238632927	3656	0.05733	8.045e-06	1774	TRUE	reported	BAaqPa	0.0458	2	TRUE	6021	0.005437	19.9754	0.000601904
rs73018738	C	T	C	T	-0.1976	-0.0507	0.0821	0.1178	FALSE	FALSE	FALSE	aJ4JgP	0.0783	0.5176	outcome	TRUE	reported	textfile	4	189769692	3656	0.04427	8.272e-06	1774	TRUE	reported	BAaqPa	0.0821	2	TRUE	6021	0.00541986	19.9121	0.00181206
rs115246881	A	C	A	C	0.2677	-0.0648	0.0432	0.0379	FALSE	FALSE	FALSE	aJ4JgP	0.1432	0.6511	outcome	TRUE	reported	textfile	2	155206362	3656	0.06049	9.917e-06	1774	TRUE	reported	BAaqPa	0.0432	2	TRUE	6021	0.00532848	19.5746	0.00133028
rs41294937	C	T	C	T	0.4838	-0.0013	0.1077	0.0582	FALSE	FALSE	FALSE	ZjXawp	0.1117	0.9907	outcome	TRUE	reported	textfile	10	6106621	3660	0.04036	1.676e-32	1775	TRUE	reported	tXxSmK	0.1077	2	TRUE	6021	0.0377767	143.612	6.30778e-21
rs147487472	A	C	A	C	0.4239	0.0155	0.0415	0.0607	FALSE	FALSE	FALSE	ZjXawp	0.1105	0.8885	outcome	TRUE	reported	textfile	10	6191376	3660	0.06144	6.118e-12	1775	TRUE	reported	tXxSmK	0.0415	2	TRUE	6021	0.012839	47.5759	9.15624e-08
rs3793662	T	C	T	C	-0.1654	0.0086	0.224	0.7932	FALSE	FALSE	FALSE	ZjXawp	0.0612	0.8881	outcome	TRUE	reported	textfile	9	95886051	3660	0.0295	2.189e-08	1775	TRUE	reported	tXxSmK	0.224	2	TRUE	6021	0.00851592	31.4188	1.50024e-05
rs4869953	G	A	G	A	-0.1282	0.0871	0.3788	0.5356	FALSE	FALSE	FALSE	ZjXawp	0.0486	0.0732	outcome	TRUE	reported	textfile	6	151209997	3660	0.02536	4.495e-07	1775	TRUE	reported	tXxSmK	0.3788	2	TRUE	6021	0.00693385	25.5411	0.00397532
rs72944931	G	A	G	A	0.5033	-0.1666	0.0139	0.0236	FALSE	FALSE	FALSE	ZjXawp	0.1844	0.3663	outcome	TRUE	reported	textfile	2	178116262	3660	0.105	1.699e-06	1775	TRUE	reported	tXxSmK	0.0139	2	TRUE	6021	0.00623845	22.9635	0.00127948
rs2139146	T	C	T	C	-0.215	0.0964	0.0796	0.1007	FALSE	FALSE	FALSE	ZjXawp	0.0806	0.2318	outcome	TRUE	reported	textfile	2	15014620	3660	0.04548	2.367e-06	1775	TRUE	reported	tXxSmK	0.0796	2	TRUE	6021	0.00606892	22.3357	0.00280041
rs11051398	T	C	T	C	-0.1219	0.0039	0.4675	0.46	FALSE	FALSE	FALSE	ZjXawp	0.0494	0.9368	outcome	TRUE	reported	textfile	12	31504316	3660	0.02602	2.915e-06	1775	TRUE	reported	tXxSmK	0.4675	2	TRUE	6021	0.00596095	21.9359	0.000270392
rs2248769	C	A	C	A	0.1751	0.0811	0.1247	0.1866	FALSE	FALSE	FALSE	ZjXawp	0.0628	0.1966	outcome	TRUE	reported	textfile	13	54938910	3660	0.03796	4.099e-06	1775	TRUE	reported	tXxSmK	0.1247	2	TRUE	6021	0.00577991	21.2658	0.00450978
rs9425892	C	T	C	T	-0.2747	-0.0382	0.0458	0.0307	FALSE	FALSE	FALSE	ZjXawp	0.1636	0.8153	outcome	TRUE	reported	textfile	1	34421513	3660	0.05967	4.292e-06	1775	TRUE	reported	tXxSmK	0.0458	2	TRUE	6021	0.00575727	21.182	0.000495324
rs11617559	C	T	C	T	0.1143	0.1339	0.4275	0.6192	FALSE	FALSE	FALSE	ZjXawp	0.0518	0.009782	outcome	TRUE	reported	textfile	13	24752225	3660	0.02495	4.789e-06	1775	TRUE	reported	tXxSmK	0.4275	2	TRUE	6021	0.00570147	20.9756	0.04335
rs8028696	T	C	T	C	0.1245	0.021	0.2829	0.2604	FALSE	FALSE	FALSE	ZjXawp	0.0559	0.7068	outcome	TRUE	reported	textfile	15	33466839	3660	0.0276	6.69e-06	1775	TRUE	reported	tXxSmK	0.2829	2	TRUE	6021	0.00552881	20.3368	0.000890834
rs11615354	T	C	T	C	0.1813	0.2449	0.1056	0.0488	FALSE	FALSE	FALSE	ZjXawp	0.1308	0.06119	outcome	TRUE	reported	textfile	12	2130438	3660	0.04021	6.723e-06	1775	TRUE	reported	tXxSmK	0.1056	2	TRUE	6021	0.00552384	20.3184	0.016335
rs72997862	C	A	C	A	-0.3759	-0.016	0.0224	0.0367	FALSE	FALSE	FALSE	ZjXawp	0.139	0.9084	outcome	TRUE	reported	textfile	6	144585977	3660	0.08407	8.014e-06	1775	TRUE	reported	tXxSmK	0.0224	2	TRUE	6021	0.0054327	19.9814	0.000556543
rs2119002	C	T	C	T	0.1709	0.0795	0.123	0.097	FALSE	FALSE	FALSE	ZjXawp	0.0841	0.3443	outcome	TRUE	reported	textfile	5	124530767	3660	0.03828	8.268e-06	1775	TRUE	reported	tXxSmK	0.123	2	TRUE	6021	0.00541627	19.9206	0.00332203
rs7869376	C	T	C	T	-0.1277	0.0575	0.2514	0.1831	FALSE	FALSE	FALSE	ZjXawp	0.0633	0.3639	outcome	TRUE	reported	textfile	9	72118434	3660	0.02863	8.469e-06	1775	TRUE	reported	tXxSmK	0.2514	2	TRUE	6021	0.00540634	19.8839	0.00311942
rs112043339	T	C	T	C	-0.5011	0.6784	0.0138	0.0135	FALSE	FALSE	FALSE	ZjXawp	0.3076	0.02741	outcome	TRUE	reported	textfile	3	174935606	3660	0.1124	8.451e-06	1775	TRUE	reported	tXxSmK	0.0138	2	TRUE	6021	0.00540111	19.8646	0.031022
rs1529188	G	C	G	C	0.1581	-0.1562	0.1434	0.1434	FALSE	TRUE	FALSE	ZjXawp	0.0703	0.0262	outcome	TRUE	reported	textfile	3	109505175	3660	0.03572	9.891e-06	1775	TRUE	reported	tXxSmK	0.1434	2	TRUE	6021	0.00532404	19.5796	0.0338843
rs6838669	C	T	C	T	-0.1356	0.0419	0.3937	0.5004	FALSE	FALSE	FALSE	GRXJVM	0.0492	0.3953	outcome	TRUE	reported	textfile	4	182081065	3505	0.02566	1.33e-07	1776	TRUE	reported	XoTE3B	0.3937	2	TRUE	6021	0.00790445	27.9099	0.000234214
rs13435269	A	G	A	G	0.1419	-0.0184	0.2682	0.2782	FALSE	FALSE	FALSE	GRXJVM	0.0552	0.7396	outcome	TRUE	reported	textfile	4	95543425	3505	0.02778	3.42e-07	1776	TRUE	reported	XoTE3B	0.2682	2	TRUE	6021	0.0073891	26.0767	0.000116453
rs144856909	A	G	A	G	0.2806	-0.0814	0.0496	0.0585	FALSE	FALSE	FALSE	GRXJVM	0.1154	0.4807	outcome	TRUE	reported	textfile	22	29988779	3505	0.0571	9.344e-07	1776	TRUE	reported	XoTE3B	0.0496	2	TRUE	6021	0.00684279	24.1354	0.000512124
rs58969602	C	G	C	G	-0.3308	-0.0029	0.0321	0.0576	FALSE	TRUE	FALSE	GRXJVM	0.1054	0.9783	outcome	TRUE	reported	textfile	20	47890347	3505	0.07145	3.781e-06	1776	TRUE	reported	XoTE3B	0.0321	2	TRUE	6021	0.00607842	21.4229	0.000252129
rs66495237	T	C	T	C	-0.114	0.0132	0.4926	0.3705	FALSE	FALSE	FALSE	GRXJVM	0.0505	0.794	outcome	TRUE	reported	textfile	14	74734614	3505	0.02463	3.821e-06	1776	TRUE	reported	XoTE3B	0.4926	2	TRUE	6021	0.006075	21.4108	0.000436098
rs35926650	G	A	G	A	0.1363	-0.0279	0.2389	0.227	FALSE	FALSE	FALSE	GRXJVM	0.059	0.636	outcome	TRUE	reported	textfile	12	32550835	3505	0.02947	3.9e-06	1776	TRUE	reported	XoTE3B	0.2389	2	TRUE	6021	0.00606598	21.3788	0.000708646
rs4446675	G	C	G	C	-0.3357	0.0739	0.0292	0.0602	FALSE	TRUE	FALSE	GRXJVM	0.1155	0.5222	outcome	TRUE	reported	textfile	7	103397333	3505	0.07281	4.162e-06	1776	TRUE	reported	XoTE3B	0.0292	2	TRUE	6021	0.00602846	21.2458	0.00106207
rs1628296	T	C	T	C	-0.343	0.1156	0.0308	0.0463	FALSE	FALSE	FALSE	GRXJVM	0.1209	0.3389	outcome	TRUE	reported	textfile	12	123309183	3505	0.07491	4.851e-06	1776	TRUE	reported	XoTE3B	0.0308	2	TRUE	6021	0.00594608	20.9537	0.00223933
rs12492348	C	G	C	G	0.1592	0.0629	0.1461	0.1093	FALSE	TRUE	FALSE	GRXJVM	0.0799	0.4313	outcome	TRUE	reported	textfile	3	187826332	3505	0.03484	5.085e-06	1776	TRUE	reported	XoTE3B	0.1461	2	TRUE	6021	0.00592192	20.8681	0.00162421
rs1731253	G	A	G	A	-0.1129	0.0048	0.4412	0.4489	FALSE	FALSE	FALSE	GRXJVM	0.0489	0.9222	outcome	TRUE	reported	textfile	2	26876429	3505	0.02522	7.858e-06	1776	TRUE	reported	XoTE3B	0.4412	2	TRUE	6021	0.00568504	20.0286	0.000472623
rs553329467	G	A	G	A	0.3365	0.3422	0.0308	0.0287	FALSE	FALSE	FALSE	GRXJVM	0.1774	0.05377	outcome	TRUE	reported	textfile	16	15087287	3505	0.07544	8.434e-06	1776	TRUE	reported	XoTE3B	0.0308	2	TRUE	6021	0.00564443	19.8847	0.0176517
rs75543866	T	C	T	C	0.156	0.019	0.1452	0.1467	FALSE	FALSE	FALSE	GRXJVM	0.0729	0.7947	outcome	TRUE	reported	textfile	12	64338105	3505	0.03503	8.748e-06	1776	TRUE	reported	XoTE3B	0.1452	2	TRUE	6021	0.0056264	19.8208	0.000727966
rs62066495	A	G	A	G	0.1206	-0.0039	0.3208	0.2899	FALSE	FALSE	FALSE	GRXJVM	0.0577	0.9465	outcome	TRUE	reported	textfile	17	16893180	3505	0.02709	8.75e-06	1776	TRUE	reported	XoTE3B	0.3208	2	TRUE	6021	0.00562263	19.8075	0.000474582
rs146320332	T	C	T	C	0.5115	0.061	0.0117	0.0187	FALSE	FALSE	FALSE	GRXJVM	0.2241	0.7854	outcome	TRUE	reported	textfile	20	10238099	3505	0.115	9.016e-06	1776	TRUE	reported	XoTE3B	0.0117	2	TRUE	6021	0.00561259	19.7719	0.000758672
rs1887027	T	C	T	C	-0.4244	0.0029	0.2454	0.2202	FALSE	FALSE	FALSE	tOfO4Y	0.0593	0.9605	outcome	TRUE	reported	textfile	10	6113782	3657	0.0273	8.063e-53	1777	TRUE	reported	so8uDz	0.2454	2	TRUE	6021	0.0619882	241.539	1.06172e-33
rs4747882	T	A	T	A	-0.2267	0.061	0.2868	0.2343	FALSE	TRUE	FALSE	tOfO4Y	0.0584	0.2958	outcome	TRUE	reported	textfile	10	6162476	3657	0.02692	5.317e-17	1777	TRUE	reported	so8uDz	0.2868	2	TRUE	6021	0.0190233	70.8786	2.25125e-09
rs11598494	C	T	C	T	-0.1762	-0.0299	0.4413	0.3473	FALSE	FALSE	FALSE	tOfO4Y	0.0513	0.5597	outcome	TRUE	reported	textfile	10	6178941	3657	0.02445	6.791e-13	1777	TRUE	reported	so8uDz	0.4413	2	TRUE	6021	0.0140025	51.9059	1.08327e-07
rs3793662	T	C	T	C	-0.1594	0.0086	0.2241	0.7932	FALSE	FALSE	FALSE	tOfO4Y	0.0612	0.8881	outcome	TRUE	reported	textfile	9	95886051	3657	0.0289	3.749e-08	1777	TRUE	reported	so8uDz	0.2241	2	TRUE	6021	0.00825008	30.4049	2.06522e-05
rs1660369	T	C	T	C	0.295	-0.0687	0.0488	0.9488	FALSE	FALSE	FALSE	tOfO4Y	0.1164	0.555	outcome	TRUE	reported	textfile	1	214407674	3657	0.05615	1.568e-07	1777	TRUE	reported	so8uDz	0.0488	2	TRUE	6021	0.00749124	27.5872	0.000159562
rs12139506	G	A	G	A	-0.2642	-0.1844	0.0543	0.0648	FALSE	FALSE	FALSE	tOfO4Y	0.1074	0.08608	outcome	TRUE	reported	textfile	1	61376720	3657	0.05361	8.645e-07	1777	TRUE	reported	so8uDz	0.0543	2	TRUE	6021	0.00659742	24.2737	0.00469284
rs3862036	A	G	A	G	-0.2881	0.1328	0.0424	0.0307	FALSE	FALSE	FALSE	tOfO4Y	0.1505	0.3776	outcome	TRUE	reported	textfile	21	44262209	3657	0.05892	1.053e-06	1777	TRUE	reported	so8uDz	0.0424	2	TRUE	6021	0.0064954	23.8959	0.000933071
rs12192925	T	C	T	C	0.1224	-0.0754	0.4367	0.3968	FALSE	FALSE	FALSE	tOfO4Y	0.0517	0.1444	outcome	TRUE	reported	textfile	6	37488754	3657	0.02505	1.072e-06	1777	TRUE	reported	so8uDz	0.4367	2	TRUE	6021	0.00648629	23.8622	0.00314425
rs28365327	A	G	A	G	-0.1397	0.0269	0.2253	0.5753	FALSE	FALSE	FALSE	tOfO4Y	0.0507	0.5962	outcome	TRUE	reported	textfile	18	25753552	3657	0.02905	1.57e-06	1777	TRUE	reported	so8uDz	0.2253	2	TRUE	6021	0.00628402	23.1134	0.000534751
rs2999572	G	T	G	T	0.1279	-0.0071	0.3095	0.2784	FALSE	FALSE	FALSE	tOfO4Y	0.055	0.8973	outcome	TRUE	reported	textfile	7	25590299	3657	0.02704	2.336e-06	1777	TRUE	reported	so8uDz	0.3095	2	TRUE	6021	0.0060807	22.3609	0.000264895
rs12907742	C	T	C	T	-0.2071	0.0064	0.0801	0.109	FALSE	FALSE	FALSE	tOfO4Y	0.0803	0.937	outcome	TRUE	reported	textfile	15	101525737	3657	0.04383	2.375e-06	1777	TRUE	reported	so8uDz	0.0801	2	TRUE	6021	0.00606805	22.3141	0.000238904
rs536374	C	T	C	T	0.1986	-0.0949	0.0945	0.8466	FALSE	FALSE	FALSE	tOfO4Y	0.068	0.1629	outcome	TRUE	reported	textfile	18	34917959	3657	0.04216	2.544e-06	1777	TRUE	reported	so8uDz	0.0945	2	TRUE	6021	0.00603122	22.1779	0.00431975
rs2139146	T	C	T	C	-0.2094	0.0964	0.0796	0.1007	FALSE	FALSE	FALSE	tOfO4Y	0.0806	0.2318	outcome	TRUE	reported	textfile	2	15014620	3657	0.04454	2.694e-06	1777	TRUE	reported	so8uDz	0.0796	2	TRUE	6021	0.00600774	22.091	0.0029859
rs59278703	A	C	A	C	0.201	0.0988	0.0904	0.0754	FALSE	FALSE	FALSE	tOfO4Y	0.1014	0.3295	outcome	TRUE	reported	textfile	11	35069685	3657	0.04337	3.72e-06	1777	TRUE	reported	so8uDz	0.0904	2	TRUE	6021	0.00583909	21.4672	0.00226686
rs7708967	A	G	A	G	-0.1126	0.005	0.4613	0.5148	FALSE	FALSE	FALSE	tOfO4Y	0.0495	0.9195	outcome	TRUE	reported	textfile	5	8139657	3657	0.0246	4.907e-06	1777	TRUE	reported	so8uDz	0.4613	2	TRUE	6021	0.0056964	20.9396	0.000393332
rs2853765	C	G	C	G	0.2088	0.0323	0.0772	0.1173	FALSE	TRUE	FALSE	tOfO4Y	0.078	0.679	outcome	TRUE	reported	textfile	10	7830675	3657	0.04568	5.022e-06	1777	TRUE	reported	so8uDz	0.0772	2	TRUE	6021	0.0056808	20.882	0.00081652
rs10852336	T	G	T	G	0.121	-0.0043	0.3136	0.7396	FALSE	FALSE	FALSE	tOfO4Y	0.0576	0.94	outcome	TRUE	reported	textfile	16	11665465	3657	0.02653	5.237e-06	1777	TRUE	reported	so8uDz	0.3136	2	TRUE	6021	0.00565598	20.7902	0.00038839
rs62135678	C	G	C	G	0.1726	0.0227	0.1176	0.1351	FALSE	TRUE	FALSE	tOfO4Y	0.0778	0.77	outcome	TRUE	reported	textfile	2	33169113	3657	0.03791	5.495e-06	1777	TRUE	reported	so8uDz	0.1176	2	TRUE	6021	0.0056363	20.7175	0.000654103
rs11245200	T	C	T	C	0.1604	0.0956	0.1303	0.1125	FALSE	FALSE	FALSE	tOfO4Y	0.0773	0.2163	outcome	TRUE	reported	textfile	10	126182752	3657	0.03531	5.734e-06	1777	TRUE	reported	so8uDz	0.1303	2	TRUE	6021	0.00561106	20.6241	0.00481266
rs12886102	T	G	T	G	-0.1292	-0.1333	0.2186	0.2473	FALSE	FALSE	FALSE	tOfO4Y	0.0573	0.02009	outcome	TRUE	reported	textfile	14	100108322	3657	0.02875	7.191e-06	1777	TRUE	reported	so8uDz	0.2186	2	TRUE	6021	0.00549203	20.1842	0.0347283
rs144182927	T	G	T	G	-0.3841	0.1081	0.0191	0.0194	FALSE	FALSE	FALSE	tOfO4Y	0.2056	0.599	outcome	TRUE	reported	textfile	21	23113704	3657	0.08676	9.81e-06	1777	TRUE	reported	so8uDz	0.0191	2	TRUE	6021	0.00533093	19.589	0.0015486
rs1887027	T	C	T	C	-0.3962	0.0029	0.2454	0.2202	FALSE	FALSE	FALSE	r3LppC	0.0593	0.9605	outcome	TRUE	reported	textfile	10	6113782	3657	0.0276	1.712e-45	1778	TRUE	reported	7K8XZI	0.2454	2	TRUE	6021	0.0533431	205.955	4.67221e-29
rs4747882	T	A	T	A	-0.1921	0.061	0.2868	0.2343	FALSE	TRUE	FALSE	r3LppC	0.0584	0.2958	outcome	TRUE	reported	textfile	10	6162476	3657	0.02715	1.798e-12	1778	TRUE	reported	7K8XZI	0.2868	2	TRUE	6021	0.0135047	50.0354	8.40121e-07
rs11598494	C	T	C	T	-0.1524	-0.0299	0.4413	0.3473	FALSE	FALSE	FALSE	r3LppC	0.0513	0.5597	outcome	TRUE	reported	textfile	10	6178941	3657	0.02465	6.895e-10	1778	TRUE	reported	7K8XZI	0.4413	2	TRUE	6021	0.0103442	38.2031	6.49887e-06
rs3793662	T	C	T	C	-0.1558	0.0086	0.2241	0.7932	FALSE	FALSE	FALSE	r3LppC	0.0612	0.8881	outcome	TRUE	reported	textfile	9	95886051	3657	0.02909	9.129e-08	1778	TRUE	reported	7K8XZI	0.2241	2	TRUE	6021	0.00778268	28.6688	3.59291e-05
rs28365327	A	G	A	G	-0.1441	0.0269	0.2253	0.5753	FALSE	FALSE	FALSE	r3LppC	0.0507	0.5962	outcome	TRUE	reported	textfile	18	25753552	3657	0.02924	8.693e-07	1778	TRUE	reported	7K8XZI	0.2253	2	TRUE	6021	0.00659741	24.2737	0.000375901
rs2853765	C	G	C	G	0.2202	0.0323	0.0772	0.1173	FALSE	TRUE	FALSE	r3LppC	0.078	0.679	outcome	TRUE	reported	textfile	10	7830675	3657	0.04599	1.75e-06	1778	TRUE	reported	7K8XZI	0.0772	2	TRUE	6021	0.00622972	22.9124	0.000435102
rs59278703	A	C	A	C	0.2078	0.0988	0.0904	0.0754	FALSE	FALSE	FALSE	r3LppC	0.1014	0.3295	outcome	TRUE	reported	textfile	11	35069685	3657	0.04366	2.013e-06	1778	TRUE	reported	7K8XZI	0.0904	2	TRUE	6021	0.00615626	22.6405	0.00162654
rs181153632	G	A	G	A	-0.4735	-0.1754	0.0163	0.0202	FALSE	FALSE	FALSE	r3LppC	0.2476	0.4786	outcome	TRUE	reported	textfile	7	30546081	3657	0.09952	2.032e-06	1778	TRUE	reported	7K8XZI	0.0163	2	TRUE	6021	0.00615197	22.6246	0.000922216
rs536374	C	T	C	T	0.1989	-0.0949	0.0945	0.8466	FALSE	FALSE	FALSE	r3LppC	0.068	0.1629	outcome	TRUE	reported	textfile	18	34917959	3657	0.04243	2.847e-06	1778	TRUE	reported	7K8XZI	0.0945	2	TRUE	6021	0.00597306	21.9627	0.00457103
rs4764609	G	A	G	A	0.1306	-0.0525	0.2587	0.7449	FALSE	FALSE	FALSE	r3LppC	0.0567	0.3546	outcome	TRUE	reported	textfile	12	5968848	3657	0.02795	3.085e-06	1778	TRUE	reported	7K8XZI	0.2587	2	TRUE	6021	0.00593489	21.8215	0.00185473
rs12139506	G	A	G	A	-0.2488	-0.1844	0.0543	0.0648	FALSE	FALSE	FALSE	r3LppC	0.1074	0.08608	outcome	TRUE	reported	textfile	1	61376720	3657	0.05397	4.162e-06	1778	TRUE	reported	7K8XZI	0.0543	2	TRUE	6021	0.00577769	21.2402	0.0099605
rs62282025	A	G	A	G	0.138	-0.1076	0.2208	0.1912	FALSE	FALSE	FALSE	r3LppC	0.0663	0.1046	outcome	TRUE	reported	textfile	3	109521072	3657	0.03015	4.847e-06	1778	TRUE	reported	7K8XZI	0.2208	2	TRUE	6021	0.0056961	20.9385	0.00907725
rs6789981	G	A	G	A	-0.2013	0.0542	0.0848	0.0768	FALSE	FALSE	FALSE	r3LppC	0.0911	0.5517	outcome	TRUE	reported	textfile	3	173712563	3657	0.04416	5.307e-06	1778	TRUE	reported	7K8XZI	0.0848	2	TRUE	6021	0.00564994	20.7679	0.00125466
rs12739411	C	G	C	G	0.4243	0.0398	0.018	0.0546	FALSE	TRUE	FALSE	r3LppC	0.1136	0.7263	outcome	TRUE	reported	textfile	1	68752573	3657	0.09312	5.365e-06	1778	TRUE	reported	7K8XZI	0.018	2	TRUE	6021	0.00564516	20.7502	0.000738277
rs10903228	G	A	G	A	0.2107	0.0926	0.0736	0.9016	FALSE	FALSE	FALSE	r3LppC	0.0838	0.2692	outcome	TRUE	reported	textfile	5	178077656	3657	0.04664	6.467e-06	1778	TRUE	reported	7K8XZI	0.0736	2	TRUE	6021	0.00554971	20.3974	0.00396959
rs75711329	A	G	A	G	-0.2724	-0.0728	0.0422	0.0266	FALSE	FALSE	FALSE	r3LppC	0.1934	0.7066	outcome	TRUE	reported	textfile	8	75494833	3657	0.0608	7.702e-06	1778	TRUE	reported	7K8XZI	0.0422	2	TRUE	6021	0.0054589	20.0618	0.000970356
rs72944931	G	A	G	A	0.4649	-0.1666	0.0138	0.0236	FALSE	FALSE	FALSE	r3LppC	0.1844	0.3663	outcome	TRUE	reported	textfile	2	178116262	3657	0.1039	7.874e-06	1778	TRUE	reported	7K8XZI	0.0138	2	TRUE	6021	0.00544492	20.0102	0.00297281
rs62013832	T	A	T	A	0.1121	-0.0064	0.3841	0.2431	FALSE	TRUE	FALSE	r3LppC	0.0574	0.9108	outcome	TRUE	reported	textfile	15	86804118	3657	0.02515	8.573e-06	1778	TRUE	reported	7K8XZI	0.3841	2	TRUE	6021	0.00540328	19.8563	0.000573795
rs2999572	G	T	G	T	0.1212	-0.0071	0.3095	0.2784	FALSE	FALSE	FALSE	r3LppC	0.055	0.8973	outcome	TRUE	reported	textfile	7	25590299	3657	0.02722	8.732e-06	1778	TRUE	reported	7K8XZI	0.3095	2	TRUE	6021	0.00539208	19.8149	0.000605275
rs11245200	T	C	T	C	0.158	0.0956	0.1303	0.1125	FALSE	FALSE	FALSE	r3LppC	0.0773	0.2163	outcome	TRUE	reported	textfile	10	126182752	3657	0.03556	9.168e-06	1778	TRUE	reported	7K8XZI	0.1303	2	TRUE	6021	0.00536942	19.7312	0.0061232
rs62626323	A	C	A	C	0.5847	-0.0058	0.1075	0.0598	FALSE	FALSE	FALSE	5RN7Rz	0.1118	0.9585	outcome	TRUE	reported	textfile	10	6115678	3657	0.03976	1.318e-47	1779	TRUE	reported	y3OyIC	0.1075	2	TRUE	6021	0.0558338	216.14	2.21944e-30
rs147487472	A	C	A	C	0.4264	0.0155	0.0414	0.0607	FALSE	FALSE	FALSE	5RN7Rz	0.1105	0.8885	outcome	TRUE	reported	textfile	10	6191376	3657	0.06126	4.004e-12	1779	TRUE	reported	y3OyIC	0.0414	2	TRUE	6021	0.0130749	48.422	6.98973e-08
rs3793662	T	C	T	C	-0.1898	0.0086	0.2241	0.7932	FALSE	FALSE	FALSE	5RN7Rz	0.0612	0.8881	outcome	TRUE	reported	textfile	9	95886051	3657	0.02934	1.114e-10	1779	TRUE	reported	y3OyIC	0.2241	2	TRUE	6021	0.0113137	41.8249	5.55733e-07
rs17403348	C	T	C	T	0.2334	0.0509	0.0997	0.042	FALSE	FALSE	FALSE	5RN7Rz	0.1402	0.7166	outcome	TRUE	reported	textfile	10	5827901	3657	0.04168	2.292e-08	1779	TRUE	reported	y3OyIC	0.0997	2	TRUE	6021	0.00850185	31.3407	2.82524e-05
rs11051398	T	C	T	C	-0.1343	0.0039	0.4675	0.46	FALSE	FALSE	FALSE	5RN7Rz	0.0494	0.9368	outcome	TRUE	reported	textfile	12	31504316	3657	0.02589	2.239e-07	1779	TRUE	reported	y3OyIC	0.4675	2	TRUE	6021	0.00730431	26.8937	5.39795e-05
rs118088397	T	C	T	C	0.3826	0.0114	0.0269	0.0178	FALSE	FALSE	FALSE	5RN7Rz	0.2079	0.9562	outcome	TRUE	reported	textfile	16	11709659	3657	0.07771	8.902e-07	1779	TRUE	reported	y3OyIC	0.0269	2	TRUE	6021	0.00658479	24.2269	0.000120502
rs112043339	T	C	T	C	-0.5414	0.6784	0.0138	0.0135	FALSE	FALSE	FALSE	5RN7Rz	0.3076	0.02741	outcome	TRUE	reported	textfile	3	174935606	3657	0.1119	1.368e-06	1779	TRUE	reported	y3OyIC	0.0138	2	TRUE	6021	0.00636034	23.3958	0.0140278
rs9425892	C	T	C	T	-0.2848	-0.0382	0.0458	0.0307	FALSE	FALSE	FALSE	5RN7Rz	0.1636	0.8153	outcome	TRUE	reported	textfile	1	34421513	3657	0.0594	1.692e-06	1779	TRUE	reported	y3OyIC	0.0458	2	TRUE	6021	0.00624684	22.9757	0.000279035
rs7906697	C	G	C	G	0.1925	0.0324	0.1001	0.1943	FALSE	TRUE	FALSE	5RN7Rz	0.0646	0.616	outcome	TRUE	reported	textfile	10	125554970	3657	0.0408	2.472e-06	1779	TRUE	reported	y3OyIC	0.1001	2	TRUE	6021	0.00605035	22.2486	0.000651652
rs4869953	G	A	G	A	-0.1187	0.0871	0.379	0.5356	FALSE	FALSE	FALSE	5RN7Rz	0.0486	0.0732	outcome	TRUE	reported	textfile	6	151209997	3657	0.02527	2.748e-06	1779	TRUE	reported	y3OyIC	0.379	2	TRUE	6021	0.00599727	22.0523	0.00933269
rs12638268	C	T	C	T	0.1202	-0.0256	0.3426	0.2649	FALSE	FALSE	FALSE	5RN7Rz	0.0552	0.642	outcome	TRUE	reported	textfile	3	11933438	3657	0.02592	3.664e-06	1779	TRUE	reported	y3OyIC	0.3426	2	TRUE	6021	0.00584612	21.4932	0.00075485
rs142537458	C	A	C	A	0.4001	-0.3464	0.0215	0.0214	FALSE	FALSE	FALSE	5RN7Rz	0.224	0.122	outcome	TRUE	reported	textfile	10	5982082	3657	0.08706	4.474e-06	1779	TRUE	reported	y3OyIC	0.0215	2	TRUE	6021	0.00574214	21.1087	0.00756847
rs59278703	A	C	A	C	0.2017	0.0988	0.0904	0.0754	FALSE	FALSE	FALSE	5RN7Rz	0.1014	0.3295	outcome	TRUE	reported	textfile	11	35069685	3657	0.04414	5.055e-06	1779	TRUE	reported	y3OyIC	0.0904	2	TRUE	6021	0.0056774	20.8694	0.00268447
rs1688627	C	A	C	A	-0.2665	-0.0369	0.0477	0.0513	FALSE	FALSE	FALSE	5RN7Rz	0.1111	0.74	outcome	TRUE	reported	textfile	6	119162482	3657	0.05841	5.21e-06	1779	TRUE	reported	y3OyIC	0.0477	2	TRUE	6021	0.00566018	20.8057	0.000696531
rs35704968	C	T	C	T	-0.3607	0.0263	0.0242	0.0421	FALSE	FALSE	FALSE	5RN7Rz	0.1375	0.8481	outcome	TRUE	reported	textfile	4	8011229	3657	0.07923	5.486e-06	1779	TRUE	reported	y3OyIC	0.0242	2	TRUE	6021	0.00563552	20.7145	0.00052115
rs148048180	A	G	A	G	-0.3241	0.2939	0.0283	0.0243	FALSE	FALSE	FALSE	5RN7Rz	0.1911	0.124	outcome	TRUE	reported	textfile	19	9181620	3657	0.07198	6.911e-06	1779	TRUE	reported	y3OyIC	0.0283	2	TRUE	6021	0.00551326	20.2627	0.00924711
rs13051777	A	G	A	G	-0.2487	0.0611	0.051	0.0641	FALSE	FALSE	FALSE	5RN7Rz	0.1049	0.5599	outcome	TRUE	reported	textfile	21	20241615	3657	0.0556	7.956e-06	1779	TRUE	reported	y3OyIC	0.051	2	TRUE	6021	0.00544136	19.997	0.001542
rs10495086	T	C	T	C	-0.3026	0.0663	0.0347	0.0656	FALSE	FALSE	FALSE	5RN7Rz	0.1027	0.5183	outcome	TRUE	reported	textfile	1	218109675	3657	0.06789	8.577e-06	1779	TRUE	reported	y3OyIC	0.0347	2	TRUE	6021	0.00540317	19.8559	0.00183672
rs41295093	A	G	A	G	0.4244	0.0251	0.1068	0.0604	FALSE	FALSE	FALSE	GmcZ7v	0.1116	0.8219	outcome	TRUE	reported	textfile	10	6120173	3642	0.0402	1.107e-25	1780	TRUE	reported	BiFtPN	0.1068	2	TRUE	6021	0.0296939	111.394	3.55389e-16
rs3793662	T	C	T	C	-0.1749	0.0086	0.2241	0.7932	FALSE	FALSE	FALSE	GmcZ7v	0.0612	0.8881	outcome	TRUE	reported	textfile	9	95886051	3642	0.02923	2.377e-09	1780	TRUE	reported	BiFtPN	0.2241	2	TRUE	6021	0.00973494	35.7836	3.67594e-06
rs77154655	C	T	C	T	-0.2911	0.0251	0.0524	0.0656	FALSE	FALSE	FALSE	GmcZ7v	0.1041	0.8096	outcome	TRUE	reported	textfile	3	16255245	3642	0.05468	1.076e-07	1780	TRUE	reported	BiFtPN	0.0524	2	TRUE	6021	0.00772184	28.3262	5.15257e-05
rs2665962	T	C	T	C	0.1264	-0.0276	0.455	0.6638	FALSE	FALSE	FALSE	GmcZ7v	0.0533	0.6043	outcome	TRUE	reported	textfile	17	74022213	3642	0.02475	3.41e-07	1780	TRUE	reported	BiFtPN	0.455	2	TRUE	6021	0.00711057	26.0678	0.000208574
rs59745557	G	A	G	A	0.2196	0.0988	0.0909	0.0754	FALSE	FALSE	FALSE	GmcZ7v	0.1014	0.3295	outcome	TRUE	reported	textfile	11	35069686	3642	0.04371	5.305e-07	1780	TRUE	reported	BiFtPN	0.0909	2	TRUE	6021	0.00688278	25.2269	0.000771379
rs262753	G	A	G	A	-0.1286	-0.0002	0.3093	0.3031	FALSE	FALSE	FALSE	GmcZ7v	0.054	0.9975	outcome	TRUE	reported	textfile	5	165060876	3642	0.02687	1.763e-06	1780	TRUE	reported	BiFtPN	0.3093	2	TRUE	6021	0.00625005	22.8933	0.000162335
rs7926898	G	C	G	C	-0.1345	0.0208	0.2449	0.3836	FALSE	TRUE	FALSE	GmcZ7v	0.0502	0.6794	outcome	TRUE	reported	textfile	11	133650237	3642	0.02861	2.687e-06	1780	TRUE	reported	BiFtPN	0.2449	2	TRUE	6021	0.00603172	22.0887	0.00055526
rs2139146	T	C	T	C	-0.2073	0.0964	0.0799	0.1007	FALSE	FALSE	FALSE	GmcZ7v	0.0806	0.2318	outcome	TRUE	reported	textfile	2	15014620	3642	0.04506	4.375e-06	1780	TRUE	reported	BiFtPN	0.0799	2	TRUE	6021	0.00577776	21.1533	0.00380839
rs1718125	T	C	T	C	0.2812	0.0633	0.0427	0.1222	FALSE	FALSE	FALSE	GmcZ7v	0.0742	0.3935	outcome	TRUE	reported	textfile	12	121593019	3642	0.06167	5.281e-06	1780	TRUE	reported	BiFtPN	0.0427	2	TRUE	6021	0.00567637	20.7799	0.00212635
rs12655234	A	G	A	G	0.1777	-0.0177	0.1113	0.1124	FALSE	FALSE	FALSE	GmcZ7v	0.0788	0.8218	outcome	TRUE	reported	textfile	5	150592481	3642	0.03922	6.077e-06	1780	TRUE	reported	BiFtPN	0.1113	2	TRUE	6021	0.00560504	20.5173	0.000592551
rs11516157	G	C	G	C	-0.1286	-0.0188	0.2444	0.2089	FALSE	TRUE	FALSE	GmcZ7v	0.064	0.7685	outcome	TRUE	reported	textfile	9	136406758	3642	0.02859	7.109e-06	1780	TRUE	reported	BiFtPN	0.2444	2	TRUE	6021	0.00552469	20.2216	0.000760539
rs11597205	T	G	T	G	0.2885	0.2799	0.0371	0.0207	FALSE	FALSE	FALSE	GmcZ7v	0.2087	0.1799	outcome	TRUE	reported	textfile	10	132601293	3642	0.06432	7.49e-06	1780	TRUE	reported	BiFtPN	0.0371	2	TRUE	6021	0.00549373	20.1076	0.00664939
rs185124612	T	C	T	C	0.4717	0.175	0.015	0.0253	FALSE	FALSE	FALSE	GmcZ7v	0.1764	0.3212	outcome	TRUE	reported	textfile	2	107128298	3642	0.1057	8.348e-06	1780	TRUE	reported	BiFtPN	0.015	2	TRUE	6021	0.00543843	19.9041	0.00361135
rs3103947	A	C	A	C	-0.114	0.0199	0.4038	0.423	FALSE	FALSE	FALSE	GmcZ7v	0.056	0.7225	outcome	TRUE	reported	textfile	3	195552071	3642	0.02565	8.991e-06	1780	TRUE	reported	BiFtPN	0.4038	2	TRUE	6021	0.00539443	19.7422	0.00101354
rs13161074	A	G	A	G	0.1531	0.1507	0.151	0.8171	FALSE	FALSE	FALSE	GmcZ7v	0.0642	0.01881	outcome	TRUE	reported	textfile	5	178057466	3642	0.03455	9.699e-06	1780	TRUE	reported	BiFtPN	0.151	2	TRUE	6021	0.00536265	19.6253	0.0399879
rs12139506	G	A	G	A	-0.2404	-0.1844	0.0542	0.0648	FALSE	FALSE	FALSE	GmcZ7v	0.1074	0.08608	outcome	TRUE	reported	textfile	1	61376720	3642	0.05427	9.729e-06	1780	TRUE	reported	BiFtPN	0.0542	2	TRUE	6021	0.0053589	19.6115	0.014709
rs41294937	C	T	C	T	0.4909	-0.0013	0.1068	0.0582	FALSE	FALSE	FALSE	TgBsLV	0.1117	0.9907	outcome	TRUE	reported	textfile	10	6106621	1835	0.05533	1.667e-18	1781	TRUE	reported	ybstko	0.1068	2	TRUE	6021	0.0411327	78.6305	1.29844e-14
rs2275848	T	G	T	G	-0.2187	0.0002	0.2289	0.7925	FALSE	FALSE	FALSE	TgBsLV	0.0606	0.9978	outcome	TRUE	reported	textfile	9	95887320	1835	0.0399	4.807e-08	1781	TRUE	reported	ybstko	0.2289	2	TRUE	6021	0.0161088	30.0108	1.72469e-06
rs72948393	C	T	C	T	-0.7003	-0.632	0.0147	0.0193	FALSE	FALSE	FALSE	TgBsLV	0.2585	0.01449	outcome	TRUE	reported	textfile	2	215843408	1835	0.1385	4.736e-07	1781	TRUE	reported	ybstko	0.0147	2	TRUE	6021	0.0137412	25.5385	0.00121672
rs2616542	T	G	T	G	0.3126	-0.018	0.0834	0.8647	FALSE	FALSE	FALSE	TgBsLV	0.0739	0.8075	outcome	TRUE	reported	textfile	3	11688393	1835	0.06189	4.833e-07	1781	TRUE	reported	ybstko	0.0834	2	TRUE	6021	0.0137121	25.4838	1.75988e-05
rs76032804	G	A	G	A	-0.396	0.1692	0.0477	0.0523	FALSE	FALSE	FALSE	TgBsLV	0.1132	0.1351	outcome	TRUE	reported	textfile	3	173656076	1835	0.07974	7.486e-07	1781	TRUE	reported	ybstko	0.0477	2	TRUE	6021	0.0132618	24.6357	0.000299928
rs2267601	A	G	A	G	0.1709	-0.0272	0.4172	0.5355	FALSE	FALSE	FALSE	TgBsLV	0.0502	0.5879	outcome	TRUE	reported	textfile	22	44448338	1835	0.03451	7.998e-07	1781	TRUE	reported	ybstko	0.4172	2	TRUE	6021	0.0131884	24.4974	4.83486e-05
rs4593388	G	A	G	A	-0.2079	-0.1242	0.2033	0.12	FALSE	FALSE	FALSE	TgBsLV	0.0763	0.1038	outcome	TRUE	reported	textfile	6	159340868	1835	0.04223	9.338e-07	1781	TRUE	reported	ybstko	0.2033	2	TRUE	6021	0.0130356	24.2099	0.00044206
rs696306	T	G	T	G	0.1754	0.08	0.3054	0.328	FALSE	FALSE	FALSE	TgBsLV	0.0521	0.1245	outcome	TRUE	reported	textfile	1	7854998	1835	0.03678	2.012e-06	1781	TRUE	reported	ybstko	0.3054	2	TRUE	6021	0.0122419	22.7176	0.00061683
rs142906903	C	G	C	G	0.747	0.006	0.0112	0.0199	FALSE	TRUE	FALSE	TgBsLV	0.2006	0.9761	outcome	TRUE	reported	textfile	8	82141410	1835	0.1576	2.313e-06	1781	TRUE	reported	ybstko	0.0112	2	TRUE	6021	0.0120951	22.4417	3.69026e-05
rs118088397	T	C	T	C	0.4811	0.0114	0.0297	0.0178	FALSE	FALSE	FALSE	TgBsLV	0.2079	0.9562	outcome	TRUE	reported	textfile	16	11709659	1835	0.1027	2.991e-06	1781	TRUE	reported	ybstko	0.0297	2	TRUE	6021	0.0118176	21.9208	4.78511e-05
rs113066333	A	G	A	G	-0.3375	-0.1343	0.0572	0.0241	FALSE	FALSE	FALSE	TgBsLV	0.1762	0.4458	outcome	TRUE	reported	textfile	2	28889318	1835	0.07297	4.004e-06	1781	TRUE	reported	ybstko	0.0572	2	TRUE	6021	0.0115236	21.3691	0.000240127
rs10843928	T	G	T	G	-0.1556	0.0224	0.4858	0.4317	FALSE	FALSE	FALSE	TgBsLV	0.0487	0.6459	outcome	TRUE	reported	textfile	12	31502991	1835	0.03376	4.335e-06	1781	TRUE	reported	ybstko	0.4858	2	TRUE	6021	0.011444	21.2198	0.000142105
rs111926422	C	A	C	A	0.3546	-0.3414	0.0499	0.0228	FALSE	FALSE	FALSE	TgBsLV	0.1876	0.0688	outcome	TRUE	reported	textfile	3	157871039	1835	0.07788	5.625e-06	1781	TRUE	reported	ybstko	0.0499	2	TRUE	6021	0.0111715	20.7087	0.00194134
rs716408	G	A	G	A	0.3925	0.1342	0.0411	0.0429	FALSE	FALSE	FALSE	TgBsLV	0.1376	0.3294	outcome	TRUE	reported	textfile	17	32309424	1835	0.08635	5.855e-06	1781	TRUE	reported	ybstko	0.0411	2	TRUE	6021	0.0111341	20.6386	0.000464834
rs2139146	T	C	T	C	-0.2782	0.0964	0.0798	0.1007	FALSE	FALSE	FALSE	TgBsLV	0.0806	0.2318	outcome	TRUE	reported	textfile	2	15014620	1835	0.06163	6.765e-06	1781	TRUE	reported	ybstko	0.0798	2	TRUE	6021	0.0109824	20.3543	0.000761904
rs12655234	A	G	A	G	0.2481	-0.0177	0.1087	0.1124	FALSE	FALSE	FALSE	TgBsLV	0.0788	0.8218	outcome	TRUE	reported	textfile	5	150592481	1835	0.05504	6.99e-06	1781	TRUE	reported	ybstko	0.1087	2	TRUE	6021	0.0109516	20.2966	0.000128186
rs9293516	T	C	T	C	-0.2459	0.0805	0.1106	0.1116	FALSE	FALSE	FALSE	TgBsLV	0.0779	0.3013	outcome	TRUE	reported	textfile	5	88747297	1835	0.05473	7.485e-06	1781	TRUE	reported	ybstko	0.1106	2	TRUE	6021	0.0108812	20.1647	0.000611424
rs10920477	G	A	G	A	0.155	0.0198	0.4185	0.5091	FALSE	FALSE	FALSE	TgBsLV	0.0485	0.6827	outcome	TRUE	reported	textfile	1	190053879	1835	0.03475	8.698e-06	1781	TRUE	reported	ybstko	0.4185	2	TRUE	6021	0.0107259	19.8738	0.000215492
rs76504408	A	G	A	G	-0.3261	0.0877	0.0575	0.0271	FALSE	FALSE	FALSE	TgBsLV	0.1734	0.613	outcome	TRUE	reported	textfile	2	11202300	1835	0.0732	8.907e-06	1781	TRUE	reported	ybstko	0.0575	2	TRUE	6021	0.0106997	19.8247	0.000264063
rs35504411	G	C	G	C	0.1636	-0.0053	0.3207	0.3597	FALSE	TRUE	FALSE	TgBsLV	0.0509	0.9166	outcome	TRUE	reported	textfile	8	6766251	1835	0.03679	9.241e-06	1781	TRUE	reported	ybstko	0.3207	2	TRUE	6021	0.0106614	19.753	0.000125454
rs147734841	G	A	G	A	0.2901	0.1649	0.0768	0.0237	FALSE	FALSE	FALSE	TgBsLV	0.1839	0.3698	outcome	TRUE	reported	textfile	5	112536717	1835	0.06526	9.32e-06	1781	TRUE	reported	ybstko	0.0768	2	TRUE	6021	0.010654	19.7391	0.000558475
rs10905716	T	C	T	C	-0.4537	0.0026	0.2439	0.2208	FALSE	FALSE	FALSE	xRt3UP	0.0592	0.9655	outcome	TRUE	reported	textfile	10	6114010	1837	0.03721	6.15e-33	1782	TRUE	reported	DLn2VW	0.2439	2	TRUE	6021	0.0748706	148.506	7.66937e-26
rs8097813	C	T	C	T	-0.1818	0.0211	0.4543	0.5037	FALSE	FALSE	FALSE	xRt3UP	0.0499	0.6725	outcome	TRUE	reported	textfile	18	67173624	1837	0.0333	5.424e-08	1782	TRUE	reported	DLn2VW	0.4543	2	TRUE	6021	0.0159661	29.7732	5.08984e-06
rs116270586	G	T	G	T	0.6723	0.0222	0.0131	0.0443	FALSE	FALSE	FALSE	xRt3UP	0.132	0.8665	outcome	TRUE	reported	textfile	3	121050031	1837	0.1428	2.685e-06	1782	TRUE	reported	DLn2VW	0.0131	2	TRUE	6021	0.0119221	22.141	5.55401e-05
rs2853765	C	G	C	G	0.3007	0.0323	0.0713	0.1173	FALSE	TRUE	FALSE	xRt3UP	0.078	0.679	outcome	TRUE	reported	textfile	10	7830675	1837	0.06431	3.129e-06	1782	TRUE	reported	DLn2VW	0.0713	2	TRUE	6021	0.0117615	21.8392	0.000102689
rs143132954	C	T	C	T	-0.6306	-0.1401	0.0161	0.0196	FALSE	FALSE	FALSE	xRt3UP	0.2105	0.5057	outcome	TRUE	reported	textfile	1	61322867	1837	0.1363	3.966e-06	1782	TRUE	reported	DLn2VW	0.0161	2	TRUE	6021	0.011518	21.3817	0.00019938
rs113066333	A	G	A	G	-0.3274	-0.1343	0.0574	0.0241	FALSE	FALSE	FALSE	xRt3UP	0.1762	0.4458	outcome	TRUE	reported	textfile	2	28889318	1837	0.07081	4.036e-06	1782	TRUE	reported	DLn2VW	0.0574	2	TRUE	6021	0.0115036	21.3548	0.00024202
rs72657101	C	T	C	T	0.2605	-0.1655	0.098	0.0611	FALSE	FALSE	FALSE	xRt3UP	0.1083	0.1263	outcome	TRUE	reported	textfile	8	62471902	1837	0.0564	4.107e-06	1782	TRUE	reported	DLn2VW	0.098	2	TRUE	6021	0.0114798	21.31	0.000979908
rs11673894	T	G	T	G	-0.1962	0.0433	0.1892	0.2243	FALSE	FALSE	FALSE	xRt3UP	0.0598	0.4696	outcome	TRUE	reported	textfile	2	118876072	1837	0.04266	4.537e-06	1782	TRUE	reported	DLn2VW	0.1892	2	TRUE	6021	0.0113835	21.1292	0.000244766
rs73084854	T	G	T	G	-0.251	0.1224	0.0993	0.0513	FALSE	FALSE	FALSE	xRt3UP	0.1105	0.2682	outcome	TRUE	reported	textfile	12	39565803	1837	0.05517	5.695e-06	1782	TRUE	reported	DLn2VW	0.0993	2	TRUE	6021	0.0111421	20.6761	0.000583528
rs114201769	C	G	C	G	-0.3574	-0.0352	0.0506	0.0217	FALSE	TRUE	FALSE	xRt3UP	0.2063	0.8646	outcome	TRUE	reported	textfile	3	48005507	1837	0.07861	5.815e-06	1782	TRUE	reported	DLn2VW	0.0506	2	TRUE	6021	0.0111272	20.6481	0.000100534
rs17043899	T	G	T	G	0.2265	0.0143	0.123	0.2369	FALSE	FALSE	FALSE	xRt3UP	0.0581	0.8052	outcome	TRUE	reported	textfile	2	115757709	1837	0.04991	6.017e-06	1782	TRUE	reported	DLn2VW	0.123	2	TRUE	6021	0.0110869	20.5726	0.000120275
rs113410977	T	G	T	G	-0.3019	0.0747	0.0612	0.035	FALSE	FALSE	FALSE	xRt3UP	0.1398	0.5934	outcome	TRUE	reported	textfile	18	42381085	1837	0.06675	6.488e-06	1782	TRUE	reported	DLn2VW	0.0612	2	TRUE	6021	0.011013	20.4339	0.000221664
rs9932192	C	T	C	T	-0.3075	-0.0196	0.0645	0.8677	FALSE	FALSE	FALSE	xRt3UP	0.0759	0.796	outcome	TRUE	reported	textfile	16	14510543	1837	0.06799	6.471e-06	1782	TRUE	reported	DLn2VW	0.0645	2	TRUE	6021	0.0110124	20.4328	0.000130099
rs2908671	G	C	G	C	-0.2765	-0.0211	0.0808	0.1334	FALSE	TRUE	FALSE	xRt3UP	0.0735	0.7742	outcome	TRUE	reported	textfile	16	5056498	1837	0.0612	6.63e-06	1782	TRUE	reported	DLn2VW	0.0808	2	TRUE	6021	0.0109895	20.3899	0.000139982
rs62246874	G	A	G	A	-0.2762	0.0664	0.08	0.0416	FALSE	FALSE	FALSE	xRt3UP	0.1387	0.6323	outcome	TRUE	reported	textfile	3	66354137	1837	0.06129	7.038e-06	1782	TRUE	reported	DLn2VW	0.08	2	TRUE	6021	0.0109341	20.2859	0.000210934
rs2052087	T	C	T	C	-0.1929	-0.0046	0.1886	0.2894	FALSE	FALSE	FALSE	xRt3UP	0.0543	0.9327	outcome	TRUE	reported	textfile	17	56242749	1837	0.04304	7.806e-06	1782	TRUE	reported	DLn2VW	0.1886	2	TRUE	6021	0.0108165	20.0654	0.000106812
rs9426902	A	G	A	G	-0.1478	-0.0053	0.4594	0.4394	FALSE	FALSE	FALSE	xRt3UP	0.0491	0.9142	outcome	TRUE	reported	textfile	1	153718746	1837	0.03329	9.578e-06	1782	TRUE	reported	DLn2VW	0.4594	2	TRUE	6021	0.0106164	19.6901	0.000129876
rs62626323	A	C	A	C	0.349	-0.0058	0.1074	0.0598	FALSE	FALSE	FALSE	rI7hcI	0.1118	0.9585	outcome	TRUE	reported	textfile	10	6115678	3656	0.03994	3.537e-18	1783	TRUE	reported	0qByvp	0.1074	2	TRUE	6021	0.0204575	76.3127	8.12153e-12
rs3793662	T	C	T	C	-0.1813	0.0086	0.2242	0.7932	FALSE	FALSE	FALSE	rI7hcI	0.0612	0.8881	outcome	TRUE	reported	textfile	9	95886051	3656	0.02898	4.379e-10	1783	TRUE	reported	0qByvp	0.2242	2	TRUE	6021	0.0105918	39.1166	1.30342e-06
rs4721574	A	G	A	G	0.1486	-0.0531	0.2808	0.2804	FALSE	FALSE	FALSE	rI7hcI	0.0545	0.3301	outcome	TRUE	reported	textfile	7	2350451	3656	0.02746	6.697e-08	1783	TRUE	reported	0qByvp	0.2808	2	TRUE	6021	0.00794631	29.2684	0.00024848
rs6550133	C	T	C	T	-0.1637	0.1125	0.1755	0.1373	FALSE	FALSE	FALSE	rI7hcI	0.0717	0.1166	outcome	TRUE	reported	textfile	3	32472280	3656	0.0318	2.742e-07	1783	TRUE	reported	0qByvp	0.1755	2	TRUE	6021	0.00719615	26.4853	0.00199364
rs11616609	T	G	T	G	-0.1207	-0.0026	0.3606	0.3643	FALSE	FALSE	FALSE	rI7hcI	0.054	0.9623	outcome	TRUE	reported	textfile	13	35106024	3656	0.02541	2.102e-06	1783	TRUE	reported	0qByvp	0.3606	2	TRUE	6021	0.00613376	22.5511	0.000204709
rs4129608	G	A	G	A	-0.1638	-0.0974	0.1469	0.1547	FALSE	FALSE	FALSE	rI7hcI	0.0683	0.1539	outcome	TRUE	reported	textfile	9	18327215	3656	0.03459	2.271e-06	1783	TRUE	reported	0qByvp	0.1469	2	TRUE	6021	0.00609628	22.4124	0.00430513
rs9596941	G	T	G	T	0.2115	-0.0585	0.0847	0.064	FALSE	FALSE	FALSE	rI7hcI	0.1107	0.5971	outcome	TRUE	reported	textfile	13	54874198	3656	0.04491	2.585e-06	1783	TRUE	reported	0qByvp	0.0847	2	TRUE	6021	0.00602978	22.1665	0.00070925
rs12341626	C	T	C	T	-0.1597	0.0049	0.1539	0.2375	FALSE	FALSE	FALSE	rI7hcI	0.0592	0.9344	outcome	TRUE	reported	textfile	9	17383792	3656	0.03463	4.1e-06	1783	TRUE	reported	0qByvp	0.1539	2	TRUE	6021	0.00578335	21.2553	0.000339735
rs145198352	C	T	C	T	-0.4484	0.0818	0.0159	0.0211	FALSE	FALSE	FALSE	rI7hcI	0.1815	0.6523	outcome	TRUE	reported	textfile	2	44009835	3656	0.09962	6.966e-06	1783	TRUE	reported	0qByvp	0.0159	2	TRUE	6021	0.00551102	20.2489	0.00107571
rs2566772	A	G	A	G	0.4644	0.0233	0.0148	0.0475	FALSE	FALSE	FALSE	rI7hcI	0.1187	0.8442	outcome	TRUE	reported	textfile	1	68704099	3656	0.1041	8.332e-06	1783	TRUE	reported	0qByvp	0.0148	2	TRUE	6021	0.00541401	19.8905	0.000686778
rs62626323	A	C	A	C	0.5433	-0.0058	0.1075	0.0598	FALSE	FALSE	FALSE	yaDIfM	0.1118	0.9585	outcome	TRUE	reported	textfile	10	6115678	3657	0.04021	1.253e-40	1784	TRUE	reported	l6w6fj	0.1075	2	TRUE	6021	0.0475477	182.463	5.78182e-26
rs147487472	A	C	A	C	0.4191	0.0155	0.0414	0.0607	FALSE	FALSE	FALSE	yaDIfM	0.1105	0.8885	outcome	TRUE	reported	textfile	10	6191376	3657	0.06162	1.198e-11	1784	TRUE	reported	l6w6fj	0.0414	2	TRUE	6021	0.0124913	46.2332	1.38873e-07
rs3793662	T	C	T	C	-0.1575	0.0086	0.2241	0.7932	FALSE	FALSE	FALSE	yaDIfM	0.0612	0.8881	outcome	TRUE	reported	textfile	9	95886051	3657	0.02958	1.074e-07	1784	TRUE	reported	l6w6fj	0.2241	2	TRUE	6021	0.00769283	28.3353	3.99687e-05
rs144941792	T	G	T	G	0.2117	-0.0206	0.1001	0.0413	FALSE	FALSE	FALSE	yaDIfM	0.1408	0.8837	outcome	TRUE	reported	textfile	10	5777776	3657	0.04191	4.619e-07	1784	TRUE	reported	l6w6fj	0.1001	2	TRUE	6021	0.00692886	25.5017	0.000100497
rs4869953	G	A	G	A	-0.1265	0.0871	0.379	0.5356	FALSE	FALSE	FALSE	yaDIfM	0.0486	0.0732	outcome	TRUE	reported	textfile	6	151209997	3657	0.02541	6.696e-07	1784	TRUE	reported	l6w6fj	0.379	2	TRUE	6021	0.00673152	24.7705	0.00479333
rs76687530	T	C	T	C	-0.194	0.0902	0.1053	0.1313	FALSE	FALSE	FALSE	yaDIfM	0.0731	0.217	outcome	TRUE	reported	textfile	11	123711887	3657	0.04068	1.938e-06	1784	TRUE	reported	l6w6fj	0.1053	2	TRUE	6021	0.00618051	22.7302	0.00270867
rs8028696	T	C	T	C	0.131	0.021	0.2827	0.2604	FALSE	FALSE	FALSE	yaDIfM	0.0559	0.7068	outcome	TRUE	reported	textfile	15	33466839	3657	0.02766	2.265e-06	1784	TRUE	reported	l6w6fj	0.2827	2	TRUE	6021	0.00609618	22.4182	0.000464171
rs9425892	C	T	C	T	-0.2829	-0.0382	0.0458	0.0307	FALSE	FALSE	FALSE	yaDIfM	0.1636	0.8153	outcome	TRUE	reported	textfile	1	34421513	3657	0.05977	2.291e-06	1784	TRUE	reported	l6w6fj	0.0458	2	TRUE	6021	0.00608866	22.3904	0.000336184
rs11051398	T	C	T	C	-0.123	0.0039	0.4675	0.46	FALSE	FALSE	FALSE	yaDIfM	0.0494	0.9368	outcome	TRUE	reported	textfile	12	31504316	3657	0.02607	2.489e-06	1784	TRUE	reported	l6w6fj	0.4675	2	TRUE	6021	0.00605017	22.248	0.000243669
rs11615354	T	C	T	C	0.19	0.2449	0.1056	0.0488	FALSE	FALSE	FALSE	yaDIfM	0.1308	0.06119	outcome	TRUE	reported	textfile	12	2130438	3657	0.0403	2.498e-06	1784	TRUE	reported	l6w6fj	0.1056	2	TRUE	6021	0.00604144	22.2157	0.0103462
rs34351616	G	A	G	A	-0.2632	0.0789	0.051	0.0647	FALSE	FALSE	FALSE	yaDIfM	0.1045	0.4506	outcome	TRUE	reported	textfile	21	20240985	3657	0.05587	2.543e-06	1784	TRUE	reported	l6w6fj	0.051	2	TRUE	6021	0.00603201	22.1808	0.00116338
rs72944931	G	A	G	A	0.4742	-0.1666	0.0138	0.0236	FALSE	FALSE	FALSE	yaDIfM	0.1844	0.3663	outcome	TRUE	reported	textfile	2	178116262	3657	0.1056	7.334e-06	1784	TRUE	reported	l6w6fj	0.0138	2	TRUE	6021	0.00548381	20.1538	0.002853
rs59757547	C	T	C	T	-0.1149	0.0649	0.3862	0.4441	FALSE	FALSE	FALSE	yaDIfM	0.0513	0.206	outcome	TRUE	reported	textfile	11	123262785	3657	0.02559	7.361e-06	1784	TRUE	reported	l6w6fj	0.3862	2	TRUE	6021	0.0054826	20.1494	0.00577094
rs6064550	T	C	T	C	-0.1469	0.0903	0.1649	0.1291	FALSE	FALSE	FALSE	yaDIfM	0.0748	0.2278	outcome	TRUE	reported	textfile	20	56009282	3657	0.03308	9.2e-06	1784	TRUE	reported	l6w6fj	0.1649	2	TRUE	6021	0.00536355	19.7095	0.00582759
rs35704968	C	T	C	T	-0.353	0.0263	0.0242	0.0421	FALSE	FALSE	FALSE	yaDIfM	0.1375	0.8481	outcome	TRUE	reported	textfile	4	8011229	3657	0.07958	9.462e-06	1784	TRUE	reported	l6w6fj	0.0242	2	TRUE	6021	0.00535163	19.6655	0.000730702
rs112043339	T	C	T	C	-0.4991	0.6784	0.0138	0.0135	FALSE	FALSE	FALSE	yaDIfM	0.3076	0.02741	outcome	TRUE	reported	textfile	3	174935606	3657	0.1126	9.556e-06	1784	TRUE	reported	l6w6fj	0.0138	2	TRUE	6021	0.00534375	19.6364	0.0325591
rs41294937	C	T	C	T	0.3718	-0.0013	0.1073	0.0582	FALSE	FALSE	FALSE	9mv83D	0.1117	0.9907	outcome	TRUE	reported	textfile	10	6106621	3649	0.04036	5.232e-20	1785	TRUE	reported	LLYtOG	0.1073	2	TRUE	6021	0.0227278	84.8161	4.70773e-13
rs11548656	G	A	G	A	-0.2363	0.2896	0.1287	0.036	FALSE	FALSE	FALSE	9mv83D	0.1364	0.03375	outcome	TRUE	reported	textfile	16	81916912	3649	0.03676	1.47e-10	1785	TRUE	reported	LLYtOG	0.1287	2	TRUE	6021	0.0111973	41.2989	0.000170868
rs147487472	A	C	A	C	0.3278	0.0155	0.0412	0.0607	FALSE	FALSE	FALSE	9mv83D	0.1105	0.8885	outcome	TRUE	reported	textfile	10	6191376	3649	0.06162	1.099e-07	1785	TRUE	reported	LLYtOG	0.0412	2	TRUE	6021	0.00769565	28.2837	4.02935e-05
rs72809405	A	G	A	G	0.149	0.1585	0.2509	0.1678	FALSE	FALSE	FALSE	9mv83D	0.0657	0.01582	outcome	TRUE	reported	textfile	2	61173382	3649	0.02967	5.32e-07	1785	TRUE	reported	LLYtOG	0.2509	2	TRUE	6021	0.00686392	25.2057	0.0132722
rs75007695	A	G	A	G	-0.5101	-0.0789	0.0148	0.0113	FALSE	FALSE	FALSE	9mv83D	0.3071	0.7972	outcome	TRUE	reported	textfile	2	241875782	3649	0.1058	1.469e-06	1785	TRUE	reported	LLYtOG	0.0148	2	TRUE	6021	0.00633006	23.2328	0.000270184
rs111500944	T	C	T	C	0.2685	-0.1884	0.0517	0.0499	FALSE	FALSE	FALSE	9mv83D	0.1212	0.1202	outcome	TRUE	reported	textfile	15	80676525	3649	0.05574	1.52e-06	1785	TRUE	reported	LLYtOG	0.0517	2	TRUE	6021	0.0063187	23.1908	0.00448245
rs17327745	G	A	G	A	-0.1977	-0.0331	0.1076	0.0662	FALSE	FALSE	FALSE	9mv83D	0.1062	0.7551	outcome	TRUE	reported	textfile	1	95917846	3649	0.04123	1.703e-06	1785	TRUE	reported	LLYtOG	0.1076	2	TRUE	6021	0.00626159	22.9799	0.000333218
rs146277285	T	C	T	C	0.3946	0.1315	0.0221	0.0231	FALSE	FALSE	FALSE	9mv83D	0.1777	0.4592	outcome	TRUE	reported	textfile	10	107243367	3649	0.08332	2.258e-06	1785	TRUE	reported	LLYtOG	0.0221	2	TRUE	6021	0.00610915	22.417	0.00104377
rs6940205	T	C	T	C	-0.1257	0.0007	0.3101	0.2301	FALSE	FALSE	FALSE	9mv83D	0.0579	0.9906	outcome	TRUE	reported	textfile	6	107141246	3649	0.0267	2.591e-06	1785	TRUE	reported	LLYtOG	0.3101	2	TRUE	6021	0.00603732	22.1518	0.00021271
rs1370277	T	A	T	A	0.1435	-0.1523	0.2096	0.1328	FALSE	TRUE	FALSE	9mv83D	0.0749	0.04202	outcome	TRUE	reported	textfile	15	80445815	3649	0.0305	2.648e-06	1785	TRUE	reported	LLYtOG	0.2096	2	TRUE	6021	0.00602981	22.1241	0.0139007
rs73224863	T	G	T	G	-0.1799	0.0755	0.1261	0.1131	FALSE	FALSE	FALSE	9mv83D	0.0793	0.3407	outcome	TRUE	reported	textfile	4	29267406	3649	0.03827	2.688e-06	1785	TRUE	reported	LLYtOG	0.1261	2	TRUE	6021	0.00601935	22.0855	0.00180503
rs11245200	T	C	T	C	0.1667	0.0956	0.1303	0.1125	FALSE	FALSE	FALSE	9mv83D	0.0773	0.2163	outcome	TRUE	reported	textfile	10	126182752	3649	0.03594	3.645e-06	1785	TRUE	reported	LLYtOG	0.1303	2	TRUE	6021	0.00586122	21.5019	0.0037727
rs2290263	A	G	A	G	-0.122	-0.0739	0.3437	0.7405	FALSE	FALSE	FALSE	9mv83D	0.0552	0.1806	outcome	TRUE	reported	textfile	7	25887278	3649	0.02644	4.064e-06	1785	TRUE	reported	LLYtOG	0.3437	2	TRUE	6021	0.00580091	21.2794	0.00487803
rs12529059	T	C	T	C	0.1341	-0.0955	0.2297	0.2346	FALSE	FALSE	FALSE	9mv83D	0.06	0.1117	outcome	TRUE	reported	textfile	6	64695023	3649	0.02909	4.151e-06	1785	TRUE	reported	LLYtOG	0.2297	2	TRUE	6021	0.00578994	21.2389	0.00790198
rs4099100	G	A	G	A	0.2514	-0.0935	0.0539	0.0428	FALSE	FALSE	FALSE	9mv83D	0.1276	0.4635	outcome	TRUE	reported	textfile	18	24488604	3649	0.05475	4.541e-06	1785	TRUE	reported	LLYtOG	0.0539	2	TRUE	6021	0.00574495	21.0729	0.00152707
rs4073186	A	G	A	G	-0.1156	-0.0377	0.4007	0.4161	FALSE	FALSE	FALSE	9mv83D	0.049	0.4415	outcome	TRUE	reported	textfile	2	30043619	3649	0.02522	4.697e-06	1785	TRUE	reported	LLYtOG	0.4007	2	TRUE	6021	0.00572477	20.9985	0.00168598
rs11636705	T	C	T	C	0.1676	0.0527	0.1322	0.1599	FALSE	FALSE	FALSE	9mv83D	0.0672	0.4327	outcome	TRUE	reported	textfile	15	96605912	3649	0.03665	4.994e-06	1785	TRUE	reported	LLYtOG	0.1322	2	TRUE	6021	0.00569829	20.9008	0.0017896
rs350822	C	T	C	T	-0.1244	-0.0449	0.2694	0.7313	FALSE	FALSE	FALSE	9mv83D	0.0572	0.4324	outcome	TRUE	reported	textfile	19	4083560	3649	0.02737	5.679e-06	1785	TRUE	reported	LLYtOG	0.2694	2	TRUE	6021	0.00562944	20.6468	0.00193053
rs2732439	A	C	A	C	0.1164	0.0126	0.3898	0.5405	FALSE	FALSE	FALSE	9mv83D	0.0497	0.7997	outcome	TRUE	reported	textfile	12	48744199	3649	0.02566	5.894e-06	1785	TRUE	reported	LLYtOG	0.3898	2	TRUE	6021	0.00560759	20.5662	0.000625928
rs7863711	G	A	G	A	0.1127	0.049	0.4411	0.449	FALSE	FALSE	FALSE	9mv83D	0.0498	0.3245	outcome	TRUE	reported	textfile	9	93616303	3649	0.02507	7.212e-06	1785	TRUE	reported	LLYtOG	0.4411	2	TRUE	6021	0.00550766	20.1977	0.00328839
rs9892531	G	T	G	T	-0.1368	-0.0397	0.2136	0.1231	FALSE	FALSE	FALSE	9mv83D	0.0803	0.6208	outcome	TRUE	reported	textfile	17	72336957	3649	0.03065	8.242e-06	1785	TRUE	reported	LLYtOG	0.2136	2	TRUE	6021	0.00542966	19.9101	0.00130541
rs9573934	C	T	C	T	-0.1404	0.0304	0.188	0.204	FALSE	FALSE	FALSE	9mv83D	0.0606	0.6157	outcome	TRUE	reported	textfile	13	77338074	3649	0.03147	8.396e-06	1785	TRUE	reported	LLYtOG	0.188	2	TRUE	6021	0.00542506	19.8931	0.00133275
rs11688172	A	G	A	G	0.1114	-0.0083	0.416	0.3707	FALSE	FALSE	FALSE	9mv83D	0.0507	0.8695	outcome	TRUE	reported	textfile	2	150793155	3649	0.02506	9.096e-06	1785	TRUE	reported	LLYtOG	0.416	2	TRUE	6021	0.00538628	19.7501	0.000664675
rs4787827	G	T	G	T	-0.147	-0.0304	0.1654	0.3279	FALSE	FALSE	FALSE	9mv83D	0.0529	0.5646	outcome	TRUE	reported	textfile	16	26306929	3649	0.03318	9.688e-06	1785	TRUE	reported	LLYtOG	0.1654	2	TRUE	6021	0.0053503	19.6175	0.00169187
rs1883832	C	T	C	T	0.2306	0.0307	0.3684	0.73	FALSE	FALSE	FALSE	vHhgIX	0.0555	0.5797	outcome	TRUE	reported	textfile	20	44746982	3651	0.02558	3.112e-19	1786	TRUE	reported	RSm53a	0.3684	2	TRUE	6021	0.0217743	81.2231	1.51726e-11
rs41295093	A	G	A	G	0.3186	0.0251	0.1067	0.0604	FALSE	FALSE	FALSE	vHhgIX	0.1116	0.8219	outcome	TRUE	reported	textfile	10	6120173	3651	0.0403	3.504e-15	1786	TRUE	reported	RSm53a	0.1067	2	TRUE	6021	0.0168305	62.466	1.1922e-09
rs1570675	C	T	C	T	0.1261	-0.0203	0.4593	0.5708	FALSE	FALSE	FALSE	vHhgIX	0.0499	0.6839	outcome	TRUE	reported	textfile	13	43406556	3651	0.0248	3.876e-07	1786	TRUE	reported	RSm53a	0.4593	2	TRUE	6021	0.00703154	25.8398	0.000172046
rs111419261	A	G	A	G	0.3724	0.3247	0.024	0.031	FALSE	FALSE	FALSE	vHhgIX	0.1449	0.02504	outcome	TRUE	reported	textfile	9	91520493	3651	0.07876	2.344e-06	1786	TRUE	reported	RSm53a	0.024	2	TRUE	6021	0.00608618	22.3445	0.0187631
rs11245200	T	C	T	C	0.1669	0.0956	0.1304	0.1125	FALSE	FALSE	FALSE	vHhgIX	0.0773	0.2163	outcome	TRUE	reported	textfile	10	126182752	3651	0.0356	2.858e-06	1786	TRUE	reported	RSm53a	0.1304	2	TRUE	6021	0.00598404	21.9672	0.00333198
rs6034999	A	G	A	G	-0.1181	-0.0146	0.4199	0.3544	FALSE	FALSE	FALSE	vHhgIX	0.0518	0.7775	outcome	TRUE	reported	textfile	20	18208277	3651	0.02525	3.005e-06	1786	TRUE	reported	RSm53a	0.4199	2	TRUE	6021	0.00595622	21.8645	0.000442692
rs11548656	G	A	G	A	-0.1707	0.2896	0.1289	0.036	FALSE	FALSE	FALSE	vHhgIX	0.1364	0.03375	outcome	TRUE	reported	textfile	16	81916912	3651	0.03656	3.146e-06	1786	TRUE	reported	RSm53a	0.1289	2	TRUE	6021	0.0059355	21.788	0.0175079
rs10806538	G	A	G	A	-0.1196	-0.0269	0.3524	0.618	FALSE	FALSE	FALSE	vHhgIX	0.0512	0.5989	outcome	TRUE	reported	textfile	6	67249077	3651	0.02571	3.408e-06	1786	TRUE	reported	RSm53a	0.3524	2	TRUE	6021	0.00589223	21.6282	0.000826694
rs35979946	G	A	G	A	0.1423	0.0703	0.1988	0.3117	FALSE	FALSE	FALSE	vHhgIX	0.0524	0.1792	outcome	TRUE	reported	textfile	4	102720551	3651	0.03094	4.402e-06	1786	TRUE	reported	RSm53a	0.1988	2	TRUE	6021	0.00576034	21.1413	0.0050956
rs13049974	C	T	C	T	-0.2726	0.0121	0.0479	0.1183	FALSE	FALSE	FALSE	vHhgIX	0.0869	0.889	outcome	TRUE	reported	textfile	21	32810944	3651	0.05958	4.923e-06	1786	TRUE	reported	RSm53a	0.0479	2	TRUE	6021	0.00570106	20.9225	0.000430404
rs1397934	G	A	G	A	-0.1204	0.023	0.3001	0.6999	FALSE	FALSE	FALSE	vHhgIX	0.0535	0.6674	outcome	TRUE	reported	textfile	4	40187596	3651	0.02642	5.346e-06	1786	TRUE	reported	RSm53a	0.3001	2	TRUE	6021	0.00565604	20.7563	0.000875253
rs885063	T	C	T	C	0.1103	0.093	0.4843	0.3034	FALSE	FALSE	FALSE	vHhgIX	0.0555	0.09385	outcome	TRUE	reported	textfile	9	133304189	3651	0.0244	6.312e-06	1786	TRUE	reported	RSm53a	0.4843	2	TRUE	6021	0.0055659	20.4237	0.0112829
rs3886263	G	C	G	C	-0.2038	0.0542	0.0798	0.1635	FALSE	TRUE	FALSE	vHhgIX	0.0661	0.4125	outcome	TRUE	reported	textfile	12	130450765	3651	0.04525	6.907e-06	1786	TRUE	reported	RSm53a	0.0798	2	TRUE	6021	0.00552527	20.2737	0.00231671
rs4747882	T	A	T	A	-0.1221	0.061	0.2866	0.2343	FALSE	TRUE	FALSE	vHhgIX	0.0584	0.2958	outcome	TRUE	reported	textfile	10	6162476	3651	0.02726	7.697e-06	1786	TRUE	reported	RSm53a	0.2866	2	TRUE	6021	0.00546497	20.0513	0.00386609
rs181382386	A	G	A	G	-0.1746	0.2952	0.11	0.028	FALSE	FALSE	FALSE	vHhgIX	0.1574	0.06073	outcome	TRUE	reported	textfile	7	49690154	3651	0.03936	9.481e-06	1786	TRUE	reported	RSm53a	0.11	2	TRUE	6021	0.00536083	19.6671	0.0190468
rs72807491	C	T	C	T	0.1409	0.1528	0.2004	0.1401	FALSE	FALSE	FALSE	vHhgIX	0.0718	0.03323	outcome	TRUE	reported	textfile	2	61154510	3651	0.03182	9.834e-06	1786	TRUE	reported	RSm53a	0.2004	2	TRUE	6021	0.00534175	19.5967	0.0290201
rs706779	C	T	C	T	-0.293	-0.0031	0.3916	0.4637	FALSE	FALSE	FALSE	r5MU6B	0.0496	0.9494	outcome	TRUE	reported	textfile	10	6098824	3657	0.02511	6.637e-31	1787	TRUE	reported	tVMTiM	0.3916	2	TRUE	6021	0.0358956	136.083	8.36165e-20
rs12722531	A	G	A	G	0.4479	0.1023	0.074	0.0318	FALSE	FALSE	FALSE	r5MU6B	0.1692	0.5456	outcome	TRUE	reported	textfile	10	6076076	3657	0.04714	3.607e-21	1787	TRUE	reported	tVMTiM	0.074	2	TRUE	6021	0.0240917	90.2288	1.32508e-12
rs12342539	T	C	T	C	-0.1657	0.1012	0.2216	0.2055	FALSE	FALSE	FALSE	r5MU6B	0.0602	0.09262	outcome	TRUE	reported	textfile	9	4327960	3657	0.02956	2.246e-08	1787	TRUE	reported	tVMTiM	0.2216	2	TRUE	6021	0.00851914	31.405	0.0007205
rs80243585	G	A	G	A	0.2012	0.0405	0.0926	0.1787	FALSE	FALSE	FALSE	r5MU6B	0.0644	0.5295	outcome	TRUE	reported	textfile	18	28337909	3657	0.04222	1.969e-06	1787	TRUE	reported	tVMTiM	0.0926	2	TRUE	6021	0.00617172	22.6977	0.000756754
rs144182927	T	G	T	G	-0.4156	0.1081	0.0191	0.0194	FALSE	FALSE	FALSE	r5MU6B	0.2056	0.599	outcome	TRUE	reported	textfile	21	23113704	3657	0.08772	2.246e-06	1787	TRUE	reported	tVMTiM	0.0191	2	TRUE	6021	0.00610058	22.4345	0.000650289
rs11036291	G	A	G	A	-0.1424	0.0413	0.2101	0.2002	FALSE	FALSE	FALSE	r5MU6B	0.0622	0.5069	outcome	TRUE	reported	textfile	11	41231092	3657	0.03012	2.37e-06	1787	TRUE	reported	tVMTiM	0.2101	2	TRUE	6021	0.00607489	22.3394	0.000910276
rs74911560	G	C	G	C	-0.3809	-0.0382	0.0237	0.056	FALSE	TRUE	FALSE	r5MU6B	0.108	0.7233	outcome	TRUE	reported	textfile	2	14883839	3657	0.08077	2.497e-06	1787	TRUE	reported	tVMTiM	0.0237	2	TRUE	6021	0.00604455	22.2272	0.000468367
rs4073186	A	G	A	G	-0.1155	-0.0377	0.4007	0.4161	FALSE	FALSE	FALSE	r5MU6B	0.049	0.4415	outcome	TRUE	reported	textfile	2	30043619	3657	0.025	3.987e-06	1787	TRUE	reported	tVMTiM	0.4007	2	TRUE	6021	0.00580272	21.3327	0.00153822
rs11694298	A	G	A	G	0.1206	-0.1002	0.3151	0.6085	FALSE	FALSE	FALSE	r5MU6B	0.0498	0.04412	outcome	TRUE	reported	textfile	2	11175178	3657	0.02623	4.401e-06	1787	TRUE	reported	tVMTiM	0.3151	2	TRUE	6021	0.00574738	21.1281	0.0170187
rs10418077	C	A	C	A	-0.5143	-0.0446	0.012	0.0183	FALSE	FALSE	FALSE	r5MU6B	0.2254	0.8431	outcome	TRUE	reported	textfile	19	17989698	3657	0.112	4.555e-06	1787	TRUE	reported	tVMTiM	0.012	2	TRUE	6021	0.00573291	21.0746	0.000471279
rs1570675	C	T	C	T	0.1132	-0.0203	0.4594	0.5708	FALSE	FALSE	FALSE	r5MU6B	0.0499	0.6839	outcome	TRUE	reported	textfile	13	43406556	3657	0.02483	5.29e-06	1787	TRUE	reported	tVMTiM	0.4594	2	TRUE	6021	0.00565136	20.7731	0.000831074
rs73374860	C	T	C	T	-0.3425	0.1769	0.0267	0.0267	FALSE	FALSE	FALSE	r5MU6B	0.1858	0.3411	outcome	TRUE	reported	textfile	18	4513432	3657	0.07563	6.136e-06	1787	TRUE	reported	tVMTiM	0.0267	2	TRUE	6021	0.00557673	20.4972	0.00285227
rs11245200	T	C	T	C	0.1611	0.0956	0.1303	0.1125	FALSE	FALSE	FALSE	r5MU6B	0.0773	0.2163	outcome	TRUE	reported	textfile	10	126182752	3657	0.03564	6.392e-06	1787	TRUE	reported	tVMTiM	0.1303	2	TRUE	6021	0.00555611	20.4211	0.00508374
rs16957211	G	C	G	C	0.1436	-0.0851	0.1843	0.2114	FALSE	TRUE	FALSE	r5MU6B	0.0603	0.1583	outcome	TRUE	reported	textfile	15	46897868	3657	0.03202	7.523e-06	1787	TRUE	reported	tVMTiM	0.1843	2	TRUE	6021	0.00546965	20.1015	0.00766457
rs2180045	C	T	C	T	0.11	-0.0097	0.4893	0.4301	FALSE	FALSE	FALSE	r5MU6B	0.0505	0.8478	outcome	TRUE	reported	textfile	6	164317117	3657	0.02464	8.198e-06	1787	TRUE	reported	tVMTiM	0.4893	2	TRUE	6021	0.00542024	19.9189	0.000674568
rs115945675	C	T	C	T	0.2558	-0.0787	0.0524	0.0521	FALSE	FALSE	FALSE	r5MU6B	0.1241	0.5258	outcome	TRUE	reported	textfile	3	127810569	3657	0.05745	8.752e-06	1787	TRUE	reported	tVMTiM	0.0524	2	TRUE	6021	0.00539198	19.8145	0.00181593
rs117534066	T	C	T	C	0.4471	0.0008	0.0145	0.0204	FALSE	FALSE	FALSE	r5MU6B	0.2089	0.9969	outcome	TRUE	reported	textfile	8	139664271	3657	0.1005	8.874e-06	1787	TRUE	reported	tVMTiM	0.0145	2	TRUE	6021	0.0053828	19.7806	0.000459713
rs1982142	G	A	G	A	0.159	0.039	0.1796	0.7423	FALSE	FALSE	FALSE	py0y9F	0.0565	0.4901	outcome	TRUE	reported	textfile	13	102272356	3656	0.03157	4.98e-07	1788	TRUE	reported	t4OXJu	0.1796	2	TRUE	6021	0.00689027	25.3517	0.000394658
rs80056168	T	C	T	C	-0.2112	0.0018	0.0888	0.0372	FALSE	FALSE	FALSE	py0y9F	0.1459	0.99	outcome	TRUE	reported	textfile	4	89684474	3656	0.04364	1.357e-06	1788	TRUE	reported	t4OXJu	0.0888	2	TRUE	6021	0.00636559	23.4089	0.000141512
rs7166343	C	T	C	T	0.1364	-0.0088	0.2508	0.788	FALSE	FALSE	FALSE	py0y9F	0.0617	0.8863	outcome	TRUE	reported	textfile	15	29885297	3656	0.02883	2.328e-06	1788	TRUE	reported	t4OXJu	0.2508	2	TRUE	6021	0.00608531	22.3718	0.000272427
rs79744969	A	T	A	T	0.2684	0.0542	0.0468	0.0401	FALSE	TRUE	FALSE	py0y9F	0.1592	0.7334	outcome	TRUE	reported	textfile	8	68654406	3656	0.05767	3.356e-06	1788	TRUE	reported	t4OXJu	0.0468	2	TRUE	6021	0.0058897	21.6485	0.000544233
rs3958466	T	A	T	A	0.1489	0.0109	0.18	0.1875	FALSE	TRUE	FALSE	py0y9F	0.0693	0.8746	outcome	TRUE	reported	textfile	1	47241376	3656	0.03207	3.561e-06	1788	TRUE	reported	t4OXJu	0.18	2	TRUE	6021	0.00586181	21.5454	0.000368294
rs149114716	C	G	C	G	-0.3504	0.1038	0.0283	0.021	FALSE	TRUE	FALSE	py0y9F	0.1859	0.5766	outcome	TRUE	reported	textfile	8	3816956	3656	0.07552	3.617e-06	1788	TRUE	reported	t4OXJu	0.0283	2	TRUE	6021	0.00585394	21.5163	0.000923423
rs62485164	C	T	C	T	-0.1348	0.105	0.2284	0.208	FALSE	FALSE	FALSE	py0y9F	0.062	0.09057	outcome	TRUE	reported	textfile	7	136341447	3656	0.02916	3.896e-06	1788	TRUE	reported	t4OXJu	0.2284	2	TRUE	6021	0.00581122	21.3583	0.00927041
rs61986645	G	A	G	A	0.2152	0.0305	0.0732	0.1128	FALSE	FALSE	FALSE	py0y9F	0.0805	0.7048	outcome	TRUE	reported	textfile	14	86928722	3656	0.04656	3.948e-06	1788	TRUE	reported	t4OXJu	0.0732	2	TRUE	6021	0.00580928	21.3511	0.000651669
rs78997789	G	A	G	A	-0.1363	0.1566	0.2296	0.1443	FALSE	FALSE	FALSE	py0y9F	0.0724	0.03066	outcome	TRUE	reported	textfile	9	76715113	3656	0.02951	3.994e-06	1788	TRUE	reported	t4OXJu	0.2296	2	TRUE	6021	0.00580123	21.3214	0.0208674
rs407948	C	T	C	T	-0.1146	-0.0062	0.3829	0.5727	FALSE	FALSE	FALSE	py0y9F	0.0506	0.9033	outcome	TRUE	reported	textfile	12	130766040	3656	0.02501	4.774e-06	1788	TRUE	reported	t4OXJu	0.3829	2	TRUE	6021	0.00571017	20.9848	0.000407216
rs6035444	T	C	T	C	0.1272	0.0785	0.2675	0.1811	FALSE	FALSE	FALSE	py0y9F	0.0636	0.2167	outcome	TRUE	reported	textfile	20	19792012	3656	0.02795	5.469e-06	1788	TRUE	reported	t4OXJu	0.2675	2	TRUE	6021	0.00563315	20.7001	0.00468909
rs11124936	G	C	G	C	0.1312	-0.0619	0.25	0.3599	FALSE	TRUE	FALSE	py0y9F	0.051	0.2248	outcome	TRUE	reported	textfile	2	43653000	3656	0.02889	5.757e-06	1788	TRUE	reported	t4OXJu	0.25	2	TRUE	6021	0.00560949	20.6127	0.00461548
rs73168598	T	G	T	G	-0.1754	-0.0294	0.1079	0.0913	FALSE	FALSE	FALSE	py0y9F	0.0925	0.7507	outcome	TRUE	reported	textfile	22	34045501	3656	0.03901	7.166e-06	1788	TRUE	reported	t4OXJu	0.1079	2	TRUE	6021	0.00549928	20.2055	0.000814594
rs4509665	T	C	T	C	-0.1175	0.0074	0.2998	0.2098	FALSE	FALSE	FALSE	py0y9F	0.0616	0.9042	outcome	TRUE	reported	textfile	10	4941911	3656	0.02624	7.684e-06	1788	TRUE	reported	t4OXJu	0.2998	2	TRUE	6021	0.00545464	20.0406	0.00055065
rs75264624	T	G	T	G	0.2063	0.1125	0.0777	0.0454	FALSE	FALSE	FALSE	py0y9F	0.1225	0.3586	outcome	TRUE	reported	textfile	14	80644758	3656	0.04609	7.799e-06	1788	TRUE	reported	t4OXJu	0.0777	2	TRUE	6021	0.00545011	20.0238	0.00304841
rs1553309	G	A	G	A	-0.1102	-0.0265	0.4695	0.4076	FALSE	FALSE	FALSE	py0y9F	0.0499	0.596	outcome	TRUE	reported	textfile	3	121910706	3656	0.02467	8.155e-06	1788	TRUE	reported	t4OXJu	0.4695	2	TRUE	6021	0.00542819	19.9429	0.00140466
rs7692931	A	G	A	G	0.1103	-0.0526	0.3948	0.6606	FALSE	FALSE	FALSE	py0y9F	0.0513	0.3051	outcome	TRUE	reported	textfile	4	118326937	3656	0.02487	9.486e-06	1788	TRUE	reported	t4OXJu	0.3948	2	TRUE	6021	0.00535135	19.659	0.00417196
rs41294937	C	T	C	T	0.5734	-0.0013	0.1075	0.0582	FALSE	FALSE	FALSE	i8ZtEs	0.1117	0.9907	outcome	TRUE	reported	textfile	10	6106621	3657	0.03893	9.243e-48	1789	TRUE	reported	yG3Ji4	0.1075	2	TRUE	6021	0.0560007	216.825	1.35684e-30
rs7078614	T	G	T	G	0.2184	0.053	0.35	0.3932	FALSE	FALSE	FALSE	i8ZtEs	0.0504	0.2928	outcome	TRUE	reported	textfile	10	6075831	3657	0.02531	9.243e-18	1789	TRUE	reported	yG3Ji4	0.35	2	TRUE	6021	0.0199546	74.4189	8.43803e-10
rs3793662	T	C	T	C	-0.1698	0.0086	0.2241	0.7932	FALSE	FALSE	FALSE	i8ZtEs	0.0612	0.8881	outcome	TRUE	reported	textfile	9	95886051	3657	0.02871	3.692e-09	1789	TRUE	reported	yG3Ji4	0.2241	2	TRUE	6021	0.00947436	34.96	4.85838e-06
rs1397934	G	A	G	A	-0.1378	0.023	0.2997	0.6999	FALSE	FALSE	FALSE	i8ZtEs	0.0535	0.6674	outcome	TRUE	reported	textfile	4	40187596	3657	0.02604	1.269e-07	1789	TRUE	reported	yG3Ji4	0.2997	2	TRUE	6021	0.00759939	27.9885	9.45657e-05
rs8066711	A	G	A	G	-0.135	-0.0167	0.2484	0.2249	FALSE	FALSE	FALSE	i8ZtEs	0.0595	0.7792	outcome	TRUE	reported	textfile	17	73885038	3657	0.02753	9.903e-07	1789	TRUE	reported	yG3Ji4	0.2484	2	TRUE	6021	0.00653257	24.0335	0.000223529
rs526811	T	C	T	C	0.1478	0.0121	0.1832	0.7818	FALSE	FALSE	FALSE	i8ZtEs	0.061	0.8434	outcome	TRUE	reported	textfile	18	2090450	3657	0.03076	1.609e-06	1789	TRUE	reported	yG3Ji4	0.1832	2	TRUE	6021	0.00627362	23.0748	0.000248561
rs188753875	C	A	C	A	0.5111	-0.244	0.0129	0.027	FALSE	FALSE	FALSE	i8ZtEs	0.2043	0.2324	outcome	TRUE	reported	textfile	10	24537541	3657	0.1067	1.737e-06	1789	TRUE	reported	yG3Ji4	0.0129	2	TRUE	6021	0.00623507	22.9322	0.00236612
rs2999572	G	T	G	T	0.127	-0.0071	0.3095	0.2784	FALSE	FALSE	FALSE	i8ZtEs	0.055	0.8973	outcome	TRUE	reported	textfile	7	25590299	3657	0.02688	2.377e-06	1789	TRUE	reported	yG3Ji4	0.3095	2	TRUE	6021	0.0060671	22.3106	0.000269246
rs138920863	C	T	C	T	-0.2799	-0.2375	0.0458	0.0201	FALSE	FALSE	FALSE	i8ZtEs	0.2149	0.2689	outcome	TRUE	reported	textfile	13	85642896	3657	0.05936	2.508e-06	1789	TRUE	reported	yG3Ji4	0.0458	2	TRUE	6021	0.00604311	22.2219	0.00239773
rs1816221	C	G	C	G	-0.1691	-0.1825	0.1351	0.0918	FALSE	TRUE	FALSE	i8ZtEs	0.087	0.03588	outcome	TRUE	reported	textfile	2	71977094	3657	0.03604	2.796e-06	1789	TRUE	reported	yG3Ji4	0.1351	2	TRUE	6021	0.00598392	22.0029	0.0160502
rs9372361	T	C	T	C	-0.1368	-0.0566	0.2246	0.3156	FALSE	FALSE	FALSE	i8ZtEs	0.0544	0.2978	outcome	TRUE	reported	textfile	6	113707049	3657	0.0293	3.133e-06	1789	TRUE	reported	yG3Ji4	0.2246	2	TRUE	6021	0.00592558	21.7871	0.00237142
rs142063706	A	T	A	T	-0.5336	-0.0869	0.0104	0.0172	FALSE	TRUE	FALSE	i8ZtEs	0.2641	0.7422	outcome	TRUE	reported	textfile	8	141253242	3657	0.1166	4.892e-06	1789	TRUE	reported	yG3Ji4	0.0104	2	TRUE	6021	0.00569416	20.9313	0.0006649
rs112937432	T	C	T	C	0.1937	-0.011	0.09	0.0456	FALSE	FALSE	FALSE	i8ZtEs	0.1377	0.9362	outcome	TRUE	reported	textfile	2	72182946	3657	0.04293	6.61e-06	1789	TRUE	reported	yG3Ji4	0.09	2	TRUE	6021	0.00553607	20.347	0.000454566
rs6866974	G	T	G	T	0.1969	0.1147	0.0823	0.9098	FALSE	FALSE	FALSE	i8ZtEs	0.0876	0.1902	outcome	TRUE	reported	textfile	5	178081193	3657	0.04387	7.42e-06	1789	TRUE	reported	yG3Ji4	0.0823	2	TRUE	6021	0.0054783	20.1335	0.00629644
rs61745051	T	C	T	C	0.5235	-0.0171	0.0109	0.0174	FALSE	FALSE	FALSE	i8ZtEs	0.2219	0.9386	outcome	TRUE	reported	textfile	20	33584197	3657	0.117	7.896e-06	1789	TRUE	reported	yG3Ji4	0.0109	2	TRUE	6021	0.0054446	20.0089	0.000504559
rs72772213	G	C	G	C	-0.2026	0.0032	0.0742	0.0814	FALSE	TRUE	FALSE	i8ZtEs	0.1041	0.9752	outcome	TRUE	reported	textfile	16	9444808	3657	0.04539	8.306e-06	1789	TRUE	reported	yG3Ji4	0.0742	2	TRUE	6021	0.00541844	19.9123	0.000468264
rs1795955	C	G	C	G	-0.1093	0.0393	0.3916	0.3319	FALSE	TRUE	FALSE	i8ZtEs	0.0516	0.4461	outcome	TRUE	reported	textfile	17	77129985	3657	0.0246	9.19e-06	1789	TRUE	reported	yG3Ji4	0.3916	2	TRUE	6021	0.00536917	19.7302	0.00242132
rs536374	C	T	C	T	0.1859	-0.0949	0.0945	0.8466	FALSE	FALSE	FALSE	i8ZtEs	0.068	0.1629	outcome	TRUE	reported	textfile	18	34917959	3657	0.04193	9.537e-06	1789	TRUE	reported	yG3Ji4	0.0945	2	TRUE	6021	0.00534633	19.6459	0.00839061
rs11036291	G	A	G	A	-0.1316	0.0413	0.2101	0.2002	FALSE	FALSE	FALSE	i8ZtEs	0.0622	0.5069	outcome	TRUE	reported	textfile	11	41231092	3657	0.02972	9.77e-06	1789	TRUE	reported	yG3Ji4	0.2101	2	TRUE	6021	0.00533294	19.5964	0.00206211
rs1887027	T	C	T	C	-0.4203	0.0029	0.2454	0.2202	FALSE	FALSE	FALSE	aiJE2p	0.0593	0.9605	outcome	TRUE	reported	textfile	10	6113782	3657	0.02736	1.163e-51	1790	TRUE	reported	EyCeyw	0.2454	2	TRUE	6021	0.0606183	235.857	5.82535e-33
rs4747882	T	A	T	A	-0.2133	0.061	0.2868	0.2343	FALSE	TRUE	FALSE	aiJE2p	0.0584	0.2958	outcome	TRUE	reported	textfile	10	6162476	3657	0.02697	3.347e-15	1790	TRUE	reported	EyCeyw	0.2868	2	TRUE	6021	0.0168163	62.5147	2.43274e-08
rs11598494	C	T	C	T	-0.1768	-0.0299	0.4413	0.3473	FALSE	FALSE	FALSE	aiJE2p	0.0513	0.5597	outcome	TRUE	reported	textfile	10	6178941	3657	0.02448	6.085e-13	1790	TRUE	reported	EyCeyw	0.4413	2	TRUE	6021	0.0140626	52.132	1.01259e-07
rs3793662	T	C	T	C	-0.1626	0.0086	0.2241	0.7932	FALSE	FALSE	FALSE	aiJE2p	0.0612	0.8881	outcome	TRUE	reported	textfile	9	95886051	3657	0.02894	2.049e-08	1790	TRUE	reported	EyCeyw	0.2241	2	TRUE	6021	0.00855828	31.5505	1.4341e-05
rs12139506	G	A	G	A	-0.2766	-0.1844	0.0543	0.0648	FALSE	FALSE	FALSE	aiJE2p	0.1074	0.08608	outcome	TRUE	reported	textfile	1	61376720	3657	0.05366	2.679e-07	1790	TRUE	reported	EyCeyw	0.0543	2	TRUE	6021	0.0072133	26.5562	0.00265222
rs3862036	A	G	A	G	-0.2943	0.1328	0.0424	0.0307	FALSE	FALSE	FALSE	aiJE2p	0.1505	0.3776	outcome	TRUE	reported	textfile	21	44262209	3657	0.05906	6.537e-07	1790	TRUE	reported	EyCeyw	0.0424	2	TRUE	6021	0.00674419	24.8174	0.000716005
rs1660369	T	C	T	C	0.2747	-0.0687	0.0488	0.9488	FALSE	FALSE	FALSE	aiJE2p	0.1164	0.555	outcome	TRUE	reported	textfile	1	214407674	3657	0.05627	1.099e-06	1790	TRUE	reported	EyCeyw	0.0488	2	TRUE	6021	0.00647467	23.8191	0.000495172
rs11632374	G	A	G	A	0.1232	0.0509	0.3404	0.3701	FALSE	FALSE	FALSE	aiJE2p	0.0512	0.3198	outcome	TRUE	reported	textfile	15	33478617	3657	0.02601	2.246e-06	1790	TRUE	reported	EyCeyw	0.3404	2	TRUE	6021	0.00609761	22.4235	0.00180257
rs11245200	T	C	T	C	0.1664	0.0956	0.1303	0.1125	FALSE	FALSE	FALSE	aiJE2p	0.0773	0.2163	outcome	TRUE	reported	textfile	10	126182752	3657	0.03537	2.651e-06	1790	TRUE	reported	EyCeyw	0.1303	2	TRUE	6021	0.00601577	22.1207	0.00321233
rs62013832	T	A	T	A	0.117	-0.0064	0.3841	0.2431	FALSE	TRUE	FALSE	aiJE2p	0.0574	0.9108	outcome	TRUE	reported	textfile	15	86804118	3657	0.02502	3.046e-06	1790	TRUE	reported	EyCeyw	0.3841	2	TRUE	6021	0.00594406	21.8554	0.000299256
rs12886102	T	G	T	G	-0.1341	-0.1333	0.2186	0.2473	FALSE	FALSE	FALSE	aiJE2p	0.0573	0.02009	outcome	TRUE	reported	textfile	14	100108322	3657	0.02881	3.387e-06	1790	TRUE	reported	EyCeyw	0.2186	2	TRUE	6021	0.00588953	21.6538	0.0252269
rs2999572	G	T	G	T	0.125	-0.0071	0.3095	0.2784	FALSE	FALSE	FALSE	aiJE2p	0.055	0.8973	outcome	TRUE	reported	textfile	7	25590299	3657	0.02708	4.029e-06	1790	TRUE	reported	EyCeyw	0.3095	2	TRUE	6021	0.00579262	21.2954	0.000374106
rs8100828	T	C	T	C	0.1769	0.0117	0.1123	0.0552	FALSE	FALSE	FALSE	aiJE2p	0.1166	0.92	outcome	TRUE	reported	textfile	19	11184104	3657	0.03867	4.952e-06	1790	TRUE	reported	EyCeyw	0.1123	2	TRUE	6021	0.00568989	20.9156	0.000395814
rs2853765	C	G	C	G	0.2087	0.0323	0.0772	0.1173	FALSE	TRUE	FALSE	aiJE2p	0.078	0.679	outcome	TRUE	reported	textfile	10	7830675	3657	0.04578	5.296e-06	1790	TRUE	reported	EyCeyw	0.0772	2	TRUE	6021	0.00565077	20.7709	0.000845167
rs144182927	T	G	T	G	-0.3944	0.1081	0.0191	0.0194	FALSE	FALSE	FALSE	aiJE2p	0.2056	0.599	outcome	TRUE	reported	textfile	21	23113704	3657	0.08698	5.978e-06	1790	TRUE	reported	EyCeyw	0.0191	2	TRUE	6021	0.00559082	20.5493	0.00115506
rs8097813	C	T	C	T	-0.1117	0.0211	0.462	0.5037	FALSE	FALSE	FALSE	aiJE2p	0.0499	0.6725	outcome	TRUE	reported	textfile	18	67173624	3657	0.02464	5.974e-06	1790	TRUE	reported	EyCeyw	0.462	2	TRUE	6021	0.00558813	20.5394	0.000925819
rs2139146	T	C	T	C	-0.2005	0.0964	0.0796	0.1007	FALSE	FALSE	FALSE	aiJE2p	0.0806	0.2318	outcome	TRUE	reported	textfile	2	15014620	3657	0.04463	7.274e-06	1790	TRUE	reported	EyCeyw	0.0796	2	TRUE	6021	0.00548858	20.1715	0.00503316
rs9972778	A	C	A	C	-0.1079	0.0258	0.4796	0.5619	FALSE	FALSE	FALSE	aiJE2p	0.0502	0.6077	outcome	TRUE	reported	textfile	16	25516463	3657	0.02436	9.739e-06	1790	TRUE	reported	EyCeyw	0.4796	2	TRUE	6021	0.00533629	19.6088	0.0015012
rs41294937	C	T	C	T	0.5626	-0.0013	0.1075	0.0582	FALSE	FALSE	FALSE	zrCbn4	0.1117	0.9907	outcome	TRUE	reported	textfile	10	6106621	3657	0.04021	2.214e-43	1791	TRUE	reported	ss8x0I	0.1075	2	TRUE	6021	0.0508111	195.656	8.13212e-28
rs147487472	A	C	A	C	0.4465	0.0155	0.0414	0.0607	FALSE	FALSE	FALSE	zrCbn4	0.1105	0.8885	outcome	TRUE	reported	textfile	10	6191376	3657	0.0617	5.599e-13	1791	TRUE	reported	ss8x0I	0.0414	2	TRUE	6021	0.014118	52.3402	2.04994e-08
rs3793662	T	C	T	C	-0.1953	0.0086	0.2241	0.7932	FALSE	FALSE	FALSE	zrCbn4	0.0612	0.8881	outcome	TRUE	reported	textfile	9	95886051	3657	0.02956	4.563e-11	1791	TRUE	reported	ss8x0I	0.2241	2	TRUE	6021	0.0117955	43.6273	3.15171e-07
rs11051398	T	C	T	C	-0.1509	0.0039	0.4675	0.46	FALSE	FALSE	FALSE	zrCbn4	0.0494	0.9368	outcome	TRUE	reported	textfile	12	31504316	3657	0.02607	7.673e-09	1791	TRUE	reported	ss8x0I	0.4675	2	TRUE	6021	0.00907843	33.4857	6.4919e-06
rs17403348	C	T	C	T	0.2314	0.0509	0.0997	0.042	FALSE	FALSE	FALSE	zrCbn4	0.1402	0.7166	outcome	TRUE	reported	textfile	10	5827901	3657	0.04201	3.858e-08	1791	TRUE	reported	ss8x0I	0.0997	2	TRUE	6021	0.00822826	30.3238	3.86885e-05
rs9425892	C	T	C	T	-0.3055	-0.0382	0.0458	0.0307	FALSE	FALSE	FALSE	zrCbn4	0.1636	0.8153	outcome	TRUE	reported	textfile	1	34421513	3657	0.05984	3.475e-07	1791	TRUE	reported	ss8x0I	0.0458	2	TRUE	6021	0.00707669	26.0496	0.00010522
rs118088397	T	C	T	C	0.3848	0.0114	0.0269	0.0178	FALSE	FALSE	FALSE	zrCbn4	0.2079	0.9562	outcome	TRUE	reported	textfile	16	11709659	3657	0.07832	9.328e-07	1791	TRUE	reported	ss8x0I	0.0269	2	TRUE	6021	0.00655756	24.1261	0.000124527
rs117788286	C	T	C	T	-0.2929	-0.0104	0.0463	0.037	FALSE	FALSE	FALSE	zrCbn4	0.2324	0.9645	outcome	TRUE	reported	textfile	13	19370199	3657	0.0623	2.689e-06	1791	TRUE	reported	ss8x0I	0.0463	2	TRUE	6021	0.00600787	22.0915	0.000236205
rs59278703	A	C	A	C	0.2061	0.0988	0.0904	0.0754	FALSE	FALSE	FALSE	zrCbn4	0.1014	0.3295	outcome	TRUE	reported	textfile	11	35069685	3657	0.04449	3.75e-06	1791	TRUE	reported	ss8x0I	0.0904	2	TRUE	6021	0.00583398	21.4483	0.00227899
rs1555271	C	T	C	T	-0.115	-0.0695	0.4788	0.4675	FALSE	FALSE	FALSE	zrCbn4	0.049	0.1565	outcome	TRUE	reported	textfile	20	20803779	3657	0.02484	3.761e-06	1791	TRUE	reported	ss8x0I	0.4788	2	TRUE	6021	0.00582679	21.4217	0.00550108
rs139257812	C	T	C	T	0.3821	0.0241	0.0228	0.0173	FALSE	FALSE	FALSE	zrCbn4	0.2278	0.9156	outcome	TRUE	reported	textfile	1	8194962	3657	0.08268	3.94e-06	1791	TRUE	reported	ss8x0I	0.0228	2	TRUE	6021	0.0058063	21.346	0.000348446
rs4869953	G	A	G	A	-0.1175	0.0871	0.379	0.5356	FALSE	FALSE	FALSE	zrCbn4	0.0486	0.0732	outcome	TRUE	reported	textfile	6	151209997	3657	0.02547	4.114e-06	1791	TRUE	reported	ss8x0I	0.379	2	TRUE	6021	0.00578592	21.2706	0.0112908
rs474490	G	T	G	T	-0.1462	0.0056	0.1967	0.7765	FALSE	FALSE	FALSE	zrCbn4	0.0598	0.9252	outcome	TRUE	reported	textfile	11	117287794	3657	0.03176	4.297e-06	1791	TRUE	reported	ss8x0I	0.1967	2	TRUE	6021	0.00576102	21.1785	0.000357633
rs8028696	T	C	T	C	0.1264	0.021	0.2827	0.2604	FALSE	FALSE	FALSE	zrCbn4	0.0559	0.7068	outcome	TRUE	reported	textfile	15	33466839	3657	0.02773	5.295e-06	1791	TRUE	reported	ss8x0I	0.2827	2	TRUE	6021	0.00564949	20.7662	0.000777244
rs1398243	A	G	A	G	0.25	0.0246	0.0536	0.0456	FALSE	FALSE	FALSE	zrCbn4	0.1206	0.838	outcome	TRUE	reported	textfile	4	145514461	3657	0.05501	5.649e-06	1791	TRUE	reported	ss8x0I	0.0536	2	TRUE	6021	0.00561598	20.6424	0.000549093
rs7028305	G	A	G	A	-0.1694	-0.0197	0.1224	0.1288	FALSE	FALSE	FALSE	zrCbn4	0.0745	0.7913	outcome	TRUE	reported	textfile	9	654681	3657	0.03741	6.155e-06	1791	TRUE	reported	ss8x0I	0.1224	2	TRUE	6021	0.00557568	20.4934	0.000660389
rs148048180	A	G	A	G	-0.3243	0.2939	0.0283	0.0243	FALSE	FALSE	FALSE	zrCbn4	0.1911	0.124	outcome	TRUE	reported	textfile	19	9181620	3657	0.07254	8.067e-06	1791	TRUE	reported	ss8x0I	0.0283	2	TRUE	6021	0.00543559	19.9757	0.00994864
rs181382386	A	G	A	G	-0.1776	0.2952	0.1098	0.028	FALSE	FALSE	FALSE	zrCbn4	0.1574	0.06073	outcome	TRUE	reported	textfile	7	49690154	3657	0.04004	9.509e-06	1791	TRUE	reported	ss8x0I	0.1098	2	TRUE	6021	0.00535109	19.6635	0.0191487
rs13019590	C	A	C	A	0.1154	0.0273	0.4537	0.3796	FALSE	FALSE	FALSE	zrCbn4	0.0503	0.5876	outcome	TRUE	reported	textfile	2	61099420	3657	0.02604	9.669e-06	1791	TRUE	reported	ss8x0I	0.4537	2	TRUE	6021	0.00534169	19.6287	0.00158571
rs1812673	C	T	C	T	0.1145	0.0301	0.4371	0.4999	FALSE	FALSE	FALSE	zrCbn4	0.0492	0.5411	outcome	TRUE	reported	textfile	7	25865542	3657	0.02585	9.815e-06	1791	TRUE	reported	ss8x0I	0.4371	2	TRUE	6021	0.00533631	19.6089	0.00184367
rs1887027	T	C	T	C	-0.4047	0.0029	0.2454	0.2202	FALSE	FALSE	FALSE	PoVk7b	0.0593	0.9605	outcome	TRUE	reported	textfile	10	6113782	3657	0.02745	7.759e-48	1792	TRUE	reported	k2CkvA	0.2454	2	TRUE	6021	0.0561024	217.242	1.55991e-30
rs4747882	T	A	T	A	-0.2093	0.061	0.2868	0.2343	FALSE	TRUE	FALSE	PoVk7b	0.0584	0.2958	outcome	TRUE	reported	textfile	10	6162476	3657	0.02699	1.145e-14	1792	TRUE	reported	k2CkvA	0.2868	2	TRUE	6021	0.016178	60.1029	4.8284e-08
rs11598494	C	T	C	T	-0.1584	-0.0299	0.4413	0.3473	FALSE	FALSE	FALSE	PoVk7b	0.0513	0.5597	outcome	TRUE	reported	textfile	10	6178941	3657	0.02453	1.203e-10	1792	TRUE	reported	k2CkvA	0.4413	2	TRUE	6021	0.0112737	41.6752	2.30041e-06
rs3793662	T	C	T	C	-0.167	0.0086	0.2241	0.7932	FALSE	FALSE	FALSE	PoVk7b	0.0612	0.8881	outcome	TRUE	reported	textfile	9	95886051	3657	0.02895	8.758e-09	1792	TRUE	reported	k2CkvA	0.2241	2	TRUE	6021	0.00901731	33.2582	8.335e-06
rs28365327	A	G	A	G	-0.1536	0.0269	0.2253	0.5753	FALSE	FALSE	FALSE	PoVk7b	0.0507	0.5962	outcome	TRUE	reported	textfile	18	25753552	3657	0.02911	1.385e-07	1792	TRUE	reported	k2CkvA	0.2253	2	TRUE	6021	0.00755578	27.8266	0.000128027
rs1660369	T	C	T	C	0.2896	-0.0687	0.0488	0.9488	FALSE	FALSE	FALSE	PoVk7b	0.1164	0.555	outcome	TRUE	reported	textfile	1	214407674	3657	0.05629	2.818e-07	1792	TRUE	reported	k2CkvA	0.0488	2	TRUE	6021	0.00718584	26.4543	0.000224214
rs2853765	C	G	C	G	0.2333	0.0323	0.0772	0.1173	FALSE	TRUE	FALSE	PoVk7b	0.078	0.679	outcome	TRUE	reported	textfile	10	7830675	3657	0.04579	3.641e-07	1792	TRUE	reported	k2CkvA	0.0772	2	TRUE	6021	0.00704841	25.9448	0.000170492
rs12139506	G	A	G	A	-0.2726	-0.1844	0.0543	0.0648	FALSE	FALSE	FALSE	PoVk7b	0.1074	0.08608	outcome	TRUE	reported	textfile	1	61376720	3657	0.05371	4.071e-07	1792	TRUE	reported	k2CkvA	0.0543	2	TRUE	6021	0.00699468	25.7456	0.00324931
rs3862036	A	G	A	G	-0.2819	0.1328	0.0424	0.0307	FALSE	FALSE	FALSE	PoVk7b	0.1505	0.3776	outcome	TRUE	reported	textfile	21	44262209	3657	0.05913	1.944e-06	1792	TRUE	reported	k2CkvA	0.0424	2	TRUE	6021	0.00617673	22.7163	0.00130955
rs62013832	T	A	T	A	0.1179	-0.0064	0.3841	0.2431	FALSE	TRUE	FALSE	PoVk7b	0.0574	0.9108	outcome	TRUE	reported	textfile	15	86804118	3657	0.02504	2.574e-06	1792	TRUE	reported	k2CkvA	0.3841	2	TRUE	6021	0.00602572	22.1575	0.000271298
rs2139146	T	C	T	C	-0.2094	0.0964	0.0796	0.1007	FALSE	FALSE	FALSE	PoVk7b	0.0806	0.2318	outcome	TRUE	reported	textfile	2	15014620	3657	0.04466	2.847e-06	1792	TRUE	reported	k2CkvA	0.0796	2	TRUE	6021	0.00597569	21.9724	0.00308386
rs7186545	C	G	C	G	-0.2213	0.0194	0.0701	0.1402	FALSE	TRUE	FALSE	PoVk7b	0.0742	0.7934	outcome	TRUE	reported	textfile	16	14508423	3657	0.04764	3.501e-06	1792	TRUE	reported	k2CkvA	0.0701	2	TRUE	6021	0.00586596	21.5666	0.000466305
rs12739411	C	G	C	G	0.4289	0.0398	0.018	0.0546	FALSE	TRUE	FALSE	PoVk7b	0.1136	0.7263	outcome	TRUE	reported	textfile	1	68752573	3657	0.09273	3.878e-06	1792	TRUE	reported	k2CkvA	0.018	2	TRUE	6021	0.00581585	21.3813	0.000605725
rs28374524	G	A	G	A	-0.1133	0.0398	0.4154	0.4599	FALSE	FALSE	FALSE	PoVk7b	0.049	0.4168	outcome	TRUE	reported	textfile	16	25533172	3657	0.02474	4.81e-06	1792	TRUE	reported	k2CkvA	0.4154	2	TRUE	6021	0.00570232	20.9615	0.0018754
rs563803689	T	C	T	C	0.2934	0.0239	0.0376	0.0323	FALSE	FALSE	FALSE	PoVk7b	0.1478	0.8716	outcome	TRUE	reported	textfile	11	102922239	3657	0.06447	5.526e-06	1792	TRUE	reported	k2CkvA	0.0376	2	TRUE	6021	0.00563154	20.6999	0.000489302
rs11245200	T	C	T	C	0.159	0.0956	0.1303	0.1125	FALSE	FALSE	FALSE	PoVk7b	0.0773	0.2163	outcome	TRUE	reported	textfile	10	126182752	3657	0.03541	7.365e-06	1792	TRUE	reported	k2CkvA	0.1303	2	TRUE	6021	0.00548314	20.1514	0.00546733
rs183392197	C	G	C	G	-0.3085	-0.0296	0.0334	0.0205	FALSE	TRUE	FALSE	PoVk7b	0.2636	0.9106	outcome	TRUE	reported	textfile	9	132487598	3657	0.06873	7.397e-06	1792	TRUE	reported	k2CkvA	0.0334	2	TRUE	6021	0.00547907	20.1363	0.000524627
rs2999572	G	T	G	T	0.1216	-0.0071	0.3095	0.2784	FALSE	FALSE	FALSE	PoVk7b	0.055	0.8973	outcome	TRUE	reported	textfile	7	25590299	3657	0.02711	7.526e-06	1792	TRUE	reported	k2CkvA	0.3095	2	TRUE	6021	0.00547142	20.1081	0.00055018
rs8097813	C	T	C	T	-0.1096	0.0211	0.462	0.5037	FALSE	FALSE	FALSE	PoVk7b	0.0499	0.6725	outcome	TRUE	reported	textfile	18	67173624	3657	0.02467	9.084e-06	1792	TRUE	reported	k2CkvA	0.462	2	TRUE	6021	0.0053681	19.7263	0.00119169
rs41294937	C	T	C	T	0.5555	-0.0013	0.1075	0.0582	FALSE	FALSE	FALSE	AQz0Fh	0.1117	0.9907	outcome	TRUE	reported	textfile	10	6106621	3657	0.03963	1.571e-43	1793	TRUE	reported	UIjFYk	0.1075	2	TRUE	6021	0.0509879	196.373	6.54508e-28
rs7078614	T	G	T	G	0.2383	0.053	0.35	0.3932	FALSE	FALSE	FALSE	AQz0Fh	0.0504	0.2928	outcome	TRUE	reported	textfile	10	6075831	3657	0.02566	2.589e-20	1793	TRUE	reported	UIjFYk	0.35	2	TRUE	6021	0.0230402	86.198	2.93732e-11
rs12907742	C	T	C	T	-0.2324	0.0064	0.0801	0.109	FALSE	FALSE	FALSE	AQz0Fh	0.0803	0.937	outcome	TRUE	reported	textfile	15	101525737	3657	0.04421	1.54e-07	1793	TRUE	reported	UIjFYk	0.0801	2	TRUE	6021	0.00749958	27.6181	4.28111e-05
rs3793662	T	C	T	C	-0.1472	0.0086	0.2241	0.7932	FALSE	FALSE	FALSE	AQz0Fh	0.0612	0.8881	outcome	TRUE	reported	textfile	9	95886051	3657	0.02918	4.78e-07	1793	TRUE	reported	UIjFYk	0.2241	2	TRUE	6021	0.00691048	25.4336	0.000101224
rs12342539	T	C	T	C	-0.1457	0.1012	0.2216	0.2055	FALSE	FALSE	FALSE	AQz0Fh	0.0602	0.09262	outcome	TRUE	reported	textfile	9	4327960	3657	0.02959	8.913e-07	1793	TRUE	reported	UIjFYk	0.2216	2	TRUE	6021	0.00658619	24.2321	0.00442551
rs12830810	C	T	C	T	-0.1229	0.0397	0.4025	0.23	FALSE	FALSE	FALSE	AQz0Fh	0.0589	0.5005	outcome	TRUE	reported	textfile	12	47930410	3657	0.02556	1.586e-06	1793	TRUE	reported	UIjFYk	0.4025	2	TRUE	6021	0.00628232	23.107	0.00074074
rs12886102	T	G	T	G	-0.1394	-0.1333	0.2186	0.2473	FALSE	FALSE	FALSE	AQz0Fh	0.0573	0.02009	outcome	TRUE	reported	textfile	14	100108322	3657	0.029	1.609e-06	1793	TRUE	reported	UIjFYk	0.2186	2	TRUE	6021	0.00627869	23.0936	0.0183918
rs144182927	T	G	T	G	-0.413	0.1081	0.0191	0.0194	FALSE	FALSE	FALSE	AQz0Fh	0.2056	0.599	outcome	TRUE	reported	textfile	21	23113704	3657	0.08755	2.475e-06	1793	TRUE	reported	UIjFYk	0.0191	2	TRUE	6021	0.00604823	22.2408	0.000689789
rs77603125	C	T	C	T	-0.3093	0.3436	0.0351	0.0161	FALSE	FALSE	FALSE	AQz0Fh	0.2252	0.127	outcome	TRUE	reported	textfile	5	179275092	3657	0.06633	3.23e-06	1793	TRUE	reported	UIjFYk	0.0351	2	TRUE	6021	0.00591072	21.7321	0.0062112
rs75038650	T	C	T	C	0.1519	0.0728	0.159	0.0927	FALSE	FALSE	FALSE	AQz0Fh	0.0924	0.4307	outcome	TRUE	reported	textfile	2	5553075	3657	0.03314	4.735e-06	1793	TRUE	reported	UIjFYk	0.159	2	TRUE	6021	0.00571213	20.9978	0.00176376
rs60525628	G	A	G	A	0.1113	-0.0035	0.4716	0.4562	FALSE	FALSE	FALSE	AQz0Fh	0.0534	0.9482	outcome	TRUE	reported	textfile	21	47558586	3657	0.02441	5.275e-06	1793	TRUE	reported	UIjFYk	0.4716	2	TRUE	6021	0.00565285	20.7786	0.00038166
rs9372361	T	C	T	C	-0.1356	-0.0566	0.2246	0.3156	FALSE	FALSE	FALSE	AQz0Fh	0.0544	0.2978	outcome	TRUE	reported	textfile	6	113707049	3657	0.02974	5.312e-06	1793	TRUE	reported	UIjFYk	0.2246	2	TRUE	6021	0.00565263	20.7778	0.00314467
rs217211	A	G	A	G	-0.1844	-0.0208	0.1061	0.8165	FALSE	FALSE	FALSE	AQz0Fh	0.0699	0.766	outcome	TRUE	reported	textfile	11	1975919	3657	0.04075	6.226e-06	1793	TRUE	reported	UIjFYk	0.1061	2	TRUE	6021	0.00556822	20.4658	0.00071763
rs61745051	T	C	T	C	0.5347	-0.0171	0.0109	0.0174	FALSE	FALSE	FALSE	AQz0Fh	0.2219	0.9386	outcome	TRUE	reported	textfile	20	33584197	3657	0.1187	6.866e-06	1793	TRUE	reported	UIjFYk	0.0109	2	TRUE	6021	0.00551812	20.2806	0.000461543
rs2252677	A	C	A	C	-0.1135	-0.0121	0.421	0.3574	FALSE	FALSE	FALSE	AQz0Fh	0.0516	0.8152	outcome	TRUE	reported	textfile	20	18206348	3657	0.02522	6.946e-06	1793	TRUE	reported	UIjFYk	0.421	2	TRUE	6021	0.0055078	20.2425	0.000668835
rs4073186	A	G	A	G	-0.1125	-0.0377	0.4007	0.4161	FALSE	FALSE	FALSE	AQz0Fh	0.049	0.4415	outcome	TRUE	reported	textfile	2	30043619	3657	0.025	7.08e-06	1793	TRUE	reported	UIjFYk	0.4007	2	TRUE	6021	0.00550683	20.2389	0.00211919
rs2999572	G	T	G	T	0.1217	-0.0071	0.3095	0.2784	FALSE	FALSE	FALSE	AQz0Fh	0.055	0.8973	outcome	TRUE	reported	textfile	7	25590299	3657	0.02729	8.484e-06	1793	TRUE	reported	UIjFYk	0.3095	2	TRUE	6021	0.00540871	19.8763	0.000593282
rs609291	G	A	G	A	0.1098	0.0001	0.4487	0.5306	FALSE	FALSE	FALSE	AQz0Fh	0.0485	0.9986	outcome	TRUE	reported	textfile	9	127809664	3657	0.02473	9.16e-06	1793	TRUE	reported	UIjFYk	0.4487	2	TRUE	6021	0.00536163	19.7024	0.000469895
rs41294937	C	T	C	T	0.476	-0.0013	0.1076	0.0582	FALSE	FALSE	FALSE	n1uH6T	0.1117	0.9907	outcome	TRUE	reported	textfile	10	6106621	3658	0.04039	1.739e-31	1794	TRUE	reported	K4G4cx	0.1076	2	TRUE	6021	0.0365796	138.813	2.72313e-20
rs147487472	A	C	A	C	0.3795	0.0155	0.0416	0.0607	FALSE	FALSE	FALSE	n1uH6T	0.1105	0.8885	outcome	TRUE	reported	textfile	10	6191376	3658	0.0615	7.548e-10	1794	TRUE	reported	K4G4cx	0.0416	2	TRUE	6021	0.0103023	38.0571	1.82458e-06
rs3793662	T	C	T	C	-0.1572	0.0086	0.224	0.7932	FALSE	FALSE	FALSE	n1uH6T	0.0612	0.8881	outcome	TRUE	reported	textfile	9	95886051	3658	0.0295	1.039e-07	1794	TRUE	reported	K4G4cx	0.224	2	TRUE	6021	0.00770298	28.3807	3.94303e-05
rs11615354	T	C	T	C	0.2089	0.2449	0.1055	0.0488	FALSE	FALSE	FALSE	n1uH6T	0.1308	0.06119	outcome	TRUE	reported	textfile	12	2130438	3658	0.04017	2.097e-07	1794	TRUE	reported	K4G4cx	0.1055	2	TRUE	6021	0.00733889	27.0294	0.00322369
rs4869953	G	A	G	A	-0.128	0.0871	0.3789	0.5356	FALSE	FALSE	FALSE	n1uH6T	0.0486	0.0732	outcome	TRUE	reported	textfile	6	151209997	3658	0.02535	4.628e-07	1794	TRUE	reported	K4G4cx	0.3789	2	TRUE	6021	0.00692156	25.4816	0.00402652
rs72944931	G	A	G	A	0.5043	-0.1666	0.0138	0.0236	FALSE	FALSE	FALSE	n1uH6T	0.1844	0.3663	outcome	TRUE	reported	textfile	2	178116262	3658	0.1053	1.724e-06	1794	TRUE	reported	K4G4cx	0.0138	2	TRUE	6021	0.00623107	22.9236	0.00129198
rs12638268	C	T	C	T	0.1222	-0.0256	0.3425	0.2649	FALSE	FALSE	FALSE	n1uH6T	0.0552	0.642	outcome	TRUE	reported	textfile	3	11933438	3658	0.026	2.693e-06	1794	TRUE	reported	K4G4cx	0.3425	2	TRUE	6021	0.00600257	22.0779	0.000631075
rs112043339	T	C	T	C	-0.5221	0.6784	0.0138	0.0135	FALSE	FALSE	FALSE	n1uH6T	0.3076	0.02741	outcome	TRUE	reported	textfile	3	174935606	3658	0.1123	3.427e-06	1794	TRUE	reported	K4G4cx	0.0138	2	TRUE	6021	0.00587416	21.6028	0.0210233
rs113492859	T	C	T	C	0.2021	-0.2588	0.0879	0.0273	FALSE	FALSE	FALSE	n1uH6T	0.1966	0.1879	outcome	TRUE	reported	textfile	4	185217641	3658	0.04381	4.104e-06	1794	TRUE	reported	K4G4cx	0.0879	2	TRUE	6021	0.00578393	21.2691	0.00472001
rs9425892	C	T	C	T	-0.2743	-0.0382	0.0458	0.0307	FALSE	FALSE	FALSE	n1uH6T	0.1636	0.8153	outcome	TRUE	reported	textfile	1	34421513	3658	0.05966	4.397e-06	1794	TRUE	reported	K4G4cx	0.0458	2	TRUE	6021	0.00574565	21.1275	0.000503281
rs11051398	T	C	T	C	-0.1194	0.0039	0.4675	0.46	FALSE	FALSE	FALSE	n1uH6T	0.0494	0.9368	outcome	TRUE	reported	textfile	12	31504316	3658	0.02601	4.582e-06	1794	TRUE	reported	K4G4cx	0.4675	2	TRUE	6021	0.00572782	21.0616	0.000359234
rs2985981	G	A	G	A	0.1429	0.0039	0.1952	0.8017	FALSE	FALSE	FALSE	n1uH6T	0.0628	0.9503	outcome	TRUE	reported	textfile	13	46094662	3658	0.03116	4.662e-06	1794	TRUE	reported	K4G4cx	0.1952	2	TRUE	6021	0.00571658	21.02	0.00035004
rs540760708	T	C	T	C	-0.5381	-0.2634	0.0128	0.0172	FALSE	FALSE	FALSE	n1uH6T	0.2705	0.3302	outcome	TRUE	reported	textfile	1	7474014	3658	0.1189	6.239e-06	1794	TRUE	reported	K4G4cx	0.0128	2	TRUE	6021	0.00556793	20.4703	0.00300383
rs11632374	G	A	G	A	0.1199	0.0509	0.3403	0.3701	FALSE	FALSE	FALSE	n1uH6T	0.0512	0.3198	outcome	TRUE	reported	textfile	15	33478617	3658	0.0265	6.268e-06	1794	TRUE	reported	K4G4cx	0.3403	2	TRUE	6021	0.00556518	20.4602	0.00313753
rs13051777	A	G	A	G	-0.2517	0.0611	0.051	0.0641	FALSE	FALSE	FALSE	n1uH6T	0.1049	0.5599	outcome	TRUE	reported	textfile	21	20241615	3658	0.05575	6.528e-06	1794	TRUE	reported	K4G4cx	0.051	2	TRUE	6021	0.0055414	20.3723	0.00137759
rs71501657	G	C	G	C	-0.4537	0.0786	0.0142	0.0198	FALSE	TRUE	FALSE	n1uH6T	0.1992	0.6933	outcome	TRUE	reported	textfile	9	113797266	3658	0.1012	7.491e-06	1794	TRUE	reported	K4G4cx	0.0142	2	TRUE	6021	0.00546453	20.0881	0.00100211
rs6064550	T	C	T	C	-0.1474	0.0903	0.1648	0.1291	FALSE	FALSE	FALSE	n1uH6T	0.0748	0.2278	outcome	TRUE	reported	textfile	20	56009282	3658	0.033	8.17e-06	1794	TRUE	reported	K4G4cx	0.1648	2	TRUE	6021	0.00542452	19.9402	0.0054784
rs62626323	A	C	A	C	0.2969	-0.0058	0.1075	0.0598	FALSE	FALSE	FALSE	BuMWvS	0.1118	0.9585	outcome	TRUE	reported	textfile	10	6115678	3657	0.04016	1.778e-13	1795	TRUE	reported	PiNZPM	0.1075	2	TRUE	6021	0.0147253	54.6255	7.27547e-09
rs3793662	T	C	T	C	-0.1557	0.0086	0.2241	0.7932	FALSE	FALSE	FALSE	BuMWvS	0.0612	0.8881	outcome	TRUE	reported	textfile	9	95886051	3657	0.02917	9.948e-08	1795	TRUE	reported	PiNZPM	0.2241	2	TRUE	6021	0.00773053	28.4752	3.82212e-05
rs4721574	A	G	A	G	0.1421	-0.0531	0.2807	0.2804	FALSE	FALSE	FALSE	BuMWvS	0.0545	0.3301	outcome	TRUE	reported	textfile	7	2350451	3657	0.02762	2.84e-07	1795	TRUE	reported	PiNZPM	0.2807	2	TRUE	6021	0.00718594	26.4547	0.000552305
rs117473115	T	C	T	C	0.3516	0.0119	0.0331	0.0225	FALSE	FALSE	FALSE	BuMWvS	0.2024	0.9532	outcome	TRUE	reported	textfile	10	54503355	3657	0.06985	5.025e-07	1795	TRUE	reported	PiNZPM	0.0331	2	TRUE	6021	0.00688084	25.3237	8.51946e-05
rs140685335	G	A	G	A	0.3598	0.2263	0.0276	0.0224	FALSE	FALSE	FALSE	BuMWvS	0.1962	0.2487	outcome	TRUE	reported	textfile	18	1584719	3657	0.07544	1.921e-06	1795	TRUE	reported	PiNZPM	0.0276	2	TRUE	6021	0.0061816	22.7343	0.00229749
rs6550133	C	T	C	T	-0.1486	0.1125	0.1754	0.1373	FALSE	FALSE	FALSE	BuMWvS	0.0717	0.1166	outcome	TRUE	reported	textfile	3	32472280	3657	0.03197	3.498e-06	1795	TRUE	reported	PiNZPM	0.1754	2	TRUE	6021	0.00587312	21.5931	0.00697421
rs61945276	A	G	A	G	-0.3331	-0.0824	0.0313	0.0307	FALSE	FALSE	FALSE	BuMWvS	0.1489	0.5802	outcome	TRUE	reported	textfile	13	22645864	3657	0.07215	4.035e-06	1795	TRUE	reported	PiNZPM	0.0313	2	TRUE	6021	0.00579466	21.3029	0.000975219
rs181825	A	G	A	G	0.3147	0.0801	0.0321	0.0745	FALSE	FALSE	FALSE	BuMWvS	0.096	0.4042	outcome	TRUE	reported	textfile	5	80131532	3657	0.06823	4.112e-06	1795	TRUE	reported	PiNZPM	0.0321	2	TRUE	6021	0.00578361	21.2621	0.00179986
rs12822478	A	C	A	C	-0.1156	0.0541	0.4841	0.426	FALSE	FALSE	FALSE	BuMWvS	0.0506	0.2851	outcome	TRUE	reported	textfile	12	31514566	3657	0.02508	4.204e-06	1795	TRUE	reported	PiNZPM	0.4841	2	TRUE	6021	0.0057759	21.2336	0.00293286
rs34513850	G	A	G	A	0.425	-0.2467	0.0179	0.0165	FALSE	FALSE	FALSE	BuMWvS	0.2329	0.2896	outcome	TRUE	reported	textfile	11	113437313	3657	0.09326	5.351e-06	1795	TRUE	reported	PiNZPM	0.0179	2	TRUE	6021	0.0056468	20.7563	0.00328413
rs876043	G	A	G	A	-0.1306	0.0476	0.239	0.8334	FALSE	FALSE	FALSE	BuMWvS	0.0665	0.4742	outcome	TRUE	reported	textfile	14	92357145	3657	0.029	6.857e-06	1795	TRUE	reported	PiNZPM	0.239	2	TRUE	6021	0.00551523	20.27	0.00187944
rs474490	G	T	G	T	-0.1399	0.0056	0.1967	0.7765	FALSE	FALSE	FALSE	BuMWvS	0.0598	0.9252	outcome	TRUE	reported	textfile	11	117287794	3657	0.03126	7.799e-06	1795	TRUE	reported	PiNZPM	0.1967	2	TRUE	6021	0.00544704	20.018	0.000522544
rs4129608	G	A	G	A	-0.1555	-0.0974	0.1468	0.1547	FALSE	FALSE	FALSE	BuMWvS	0.0683	0.1539	outcome	TRUE	reported	textfile	9	18327215	3657	0.03481	8.181e-06	1795	TRUE	reported	PiNZPM	0.1468	2	TRUE	6021	0.00542706	19.9441	0.00820345
rs11099673	G	A	G	A	0.115	0.0593	0.3558	0.7109	FALSE	FALSE	FALSE	BuMWvS	0.0543	0.2746	outcome	TRUE	reported	textfile	4	148899082	3657	0.02576	8.263e-06	1795	TRUE	reported	PiNZPM	0.3558	2	TRUE	6021	0.00542024	19.9189	0.00441894
rs74709342	G	A	G	A	0.2699	-0.0933	0.0425	0.0775	FALSE	FALSE	FALSE	BuMWvS	0.1034	0.367	outcome	TRUE	reported	textfile	13	107000655	3657	0.06057	8.584e-06	1795	TRUE	reported	PiNZPM	0.0425	2	TRUE	6021	0.00540025	19.8451	0.00310954
rs145391000	A	G	A	G	-0.4931	0.338	0.012	0.0206	FALSE	FALSE	FALSE	BuMWvS	0.1908	0.07649	outcome	TRUE	reported	textfile	15	63648692	3657	0.1108	8.844e-06	1795	TRUE	reported	PiNZPM	0.012	2	TRUE	6021	0.00538666	19.7949	0.0155994
rs80322600	C	T	C	T	-0.5125	-0.1964	0.0158	0.0273	FALSE	FALSE	FALSE	FqugVM	0.1734	0.2575	outcome	TRUE	reported	textfile	16	55456633	3634	0.103	6.764e-07	1796	TRUE	reported	fNWmnH	0.0158	2	TRUE	6021	0.00676674	24.7442	0.00123867
rs116588562	A	T	A	T	0.2247	-0.0789	0.0718	0.0385	FALSE	TRUE	FALSE	FqugVM	0.1444	0.5847	outcome	TRUE	reported	textfile	1	201089372	3634	0.04697	1.795e-06	1796	TRUE	reported	fNWmnH	0.0718	2	TRUE	6021	0.00625826	22.8731	0.00058512
rs4446062	A	G	A	G	0.1271	0.0192	0.2847	0.2388	FALSE	FALSE	FALSE	FqugVM	0.0569	0.7357	outcome	TRUE	reported	textfile	2	57498544	3634	0.02719	3.049e-06	1796	TRUE	reported	fNWmnH	0.2847	2	TRUE	6021	0.00597701	21.839	0.000500517
rs117208568	A	C	A	C	0.4344	-0.014	0.0168	0.0323	FALSE	FALSE	FALSE	FqugVM	0.1622	0.931	outcome	TRUE	reported	textfile	15	54126596	3634	0.09339	3.405e-06	1796	TRUE	reported	fNWmnH	0.0168	2	TRUE	6021	0.00591856	21.6242	0.000298768
rs4752656	T	C	T	C	-0.1161	0.0145	0.4034	0.5859	FALSE	FALSE	FALSE	FqugVM	0.0496	0.7696	outcome	TRUE	reported	textfile	10	123899507	3634	0.02529	4.612e-06	1796	TRUE	reported	fNWmnH	0.4034	2	TRUE	6021	0.00576594	21.0634	0.000577023
rs66732006	C	T	C	T	0.16	0.0467	0.1439	0.1697	FALSE	FALSE	FALSE	FqugVM	0.0696	0.5023	outcome	TRUE	reported	textfile	2	102157635	3634	0.03508	5.299e-06	1796	TRUE	reported	fNWmnH	0.1439	2	TRUE	6021	0.00569189	20.7913	0.00143994
rs2939611	G	A	G	A	0.1894	0.0267	0.0926	0.1883	FALSE	FALSE	FALSE	FqugVM	0.0635	0.6746	outcome	TRUE	reported	textfile	18	46871075	3634	0.04193	6.482e-06	1796	TRUE	reported	fNWmnH	0.0926	2	TRUE	6021	0.00558334	20.3925	0.000947837
rs2910346	G	C	G	C	0.1915	-0.1209	0.0882	0.0874	FALSE	TRUE	FALSE	FqugVM	0.0898	0.1784	outcome	TRUE	reported	textfile	19	8929031	3634	0.0428	7.926e-06	1796	TRUE	reported	fNWmnH	0.0882	2	TRUE	6021	0.00547872	20.0083	0.00685029
rs10175058	C	T	C	T	0.1075	0.061	0.4719	0.4978	FALSE	FALSE	FALSE	FqugVM	0.0487	0.2101	outcome	TRUE	reported	textfile	2	162276981	3634	0.02412	8.479e-06	1796	TRUE	reported	fNWmnH	0.4719	2	TRUE	6021	0.00543638	19.8529	0.00599924
rs878511	A	G	A	G	0.1415	-0.1257	0.1786	0.2185	FALSE	FALSE	FALSE	FqugVM	0.0591	0.03357	outcome	TRUE	reported	textfile	11	43543339	3634	0.03183	9.065e-06	1796	TRUE	reported	fNWmnH	0.1786	2	TRUE	6021	0.00540878	19.7515	0.0276177
rs7015229	G	A	G	A	0.1755	0.1321	0.1048	0.1877	FALSE	FALSE	FALSE	FqugVM	0.0625	0.03456	outcome	TRUE	reported	textfile	8	124077305	3634	0.03954	9.357e-06	1796	TRUE	reported	fNWmnH	0.1048	2	TRUE	6021	0.00539198	19.6898	0.0274289
rs10914353	A	G	A	G	-0.165	-0.1304	0.1209	0.1757	FALSE	FALSE	FALSE	FqugVM	0.0661	0.04853	outcome	TRUE	reported	textfile	1	30235009	3634	0.03726	9.758e-06	1796	TRUE	reported	fNWmnH	0.1209	2	TRUE	6021	0.00536735	19.5994	0.0223903
rs1785249	T	C	T	C	-0.1234	-0.015	0.38	0.3615	FALSE	FALSE	FALSE	kFFJh8	0.0537	0.7796	outcome	TRUE	reported	textfile	18	3362511	3592	0.02452	5.086e-07	1797	TRUE	reported	ZMPMme	0.38	2	TRUE	6021	0.00700167	25.3132	0.000140541
rs74551235	A	G	A	G	-0.2031	0.0129	0.0899	0.1037	FALSE	FALSE	FALSE	kFFJh8	0.0811	0.8735	outcome	TRUE	reported	textfile	6	150575442	3592	0.04168	1.15e-06	1797	TRUE	reported	ZMPMme	0.0899	2	TRUE	6021	0.00656699	23.7314	0.00017355
rs10740344	T	C	T	C	-0.1301	0.0517	0.2606	0.6515	FALSE	FALSE	FALSE	kFFJh8	0.0523	0.3231	outcome	TRUE	reported	textfile	10	72155840	3592	0.02703	1.53e-06	1797	TRUE	reported	ZMPMme	0.2606	2	TRUE	6021	0.00640817	23.1537	0.00137089
rs2024568	C	T	C	T	-0.118	0.0223	0.364	0.7311	FALSE	FALSE	FALSE	kFFJh8	0.0562	0.6916	outcome	TRUE	reported	textfile	20	44732089	3592	0.02501	2.488e-06	1797	TRUE	reported	ZMPMme	0.364	2	TRUE	6021	0.0061591	22.2482	0.000487831
rs4578504	G	C	G	C	-0.1364	-0.053	0.23	0.2675	FALSE	TRUE	FALSE	kFFJh8	0.0566	0.3495	outcome	TRUE	reported	textfile	13	27510490	3592	0.02898	2.608e-06	1797	TRUE	reported	ZMPMme	0.23	2	TRUE	6021	0.00612951	22.1406	0.0016407
rs909973	G	A	G	A	0.4996	-0.3315	0.0131	0.0236	FALSE	FALSE	FALSE	kFFJh8	0.1801	0.06565	outcome	TRUE	reported	textfile	1	40901979	3592	0.1065	2.805e-06	1797	TRUE	reported	ZMPMme	0.0131	2	TRUE	6021	0.00608915	21.994	0.00977459
rs61566441	T	C	T	C	0.1244	0.1284	0.2848	0.1953	FALSE	FALSE	FALSE	kFFJh8	0.0621	0.03859	outcome	TRUE	reported	textfile	3	155044125	3592	0.02693	3.95e-06	1797	TRUE	reported	ZMPMme	0.2848	2	TRUE	6021	0.00590554	21.3268	0.0169195
rs7007180	G	T	G	T	0.1322	0.0014	0.2646	0.6228	FALSE	FALSE	FALSE	kFFJh8	0.0563	0.9799	outcome	TRUE	reported	textfile	8	6947493	3592	0.0288	4.61e-06	1797	TRUE	reported	ZMPMme	0.2646	2	TRUE	6021	0.00583178	21.0589	0.000301741
rs9914679	T	C	T	C	-0.1266	0.0714	0.2572	0.7143	FALSE	FALSE	FALSE	kFFJh8	0.0579	0.2178	outcome	TRUE	reported	textfile	17	13675196	3592	0.0276	4.678e-06	1797	TRUE	reported	ZMPMme	0.2572	2	TRUE	6021	0.0058234	21.0285	0.00406919
rs113532966	C	T	C	T	0.1937	0.0251	0.0846	0.0606	FALSE	FALSE	FALSE	kFFJh8	0.1097	0.8193	outcome	TRUE	reported	textfile	2	50627626	3592	0.04232	4.866e-06	1797	TRUE	reported	ZMPMme	0.0846	2	TRUE	6021	0.00579837	20.9376	0.000503835
rs8072367	C	T	C	T	-0.1944	-0.0723	0.0869	0.1075	FALSE	FALSE	FALSE	kFFJh8	0.0792	0.3611	outcome	TRUE	reported	textfile	17	75901729	3592	0.04255	5.058e-06	1797	TRUE	reported	ZMPMme	0.0869	2	TRUE	6021	0.00577751	20.8618	0.00225736
rs74432706	T	C	T	C	0.3494	-0.1872	0.0245	0.0498	FALSE	FALSE	FALSE	kFFJh8	0.1205	0.1201	outcome	TRUE	reported	textfile	2	197887417	3592	0.0766	5.233e-06	1797	TRUE	reported	ZMPMme	0.0245	2	TRUE	6021	0.00575895	20.7944	0.00788899
rs139998	C	T	C	T	-0.121	-0.0547	0.2739	0.1987	FALSE	FALSE	FALSE	kFFJh8	0.0622	0.3789	outcome	TRUE	reported	textfile	22	36862501	3592	0.02655	5.402e-06	1797	TRUE	reported	ZMPMme	0.2739	2	TRUE	6021	0.00574912	20.7587	0.00217213
rs7114298	G	A	G	A	-0.1221	-0.0267	0.2794	0.6433	FALSE	FALSE	FALSE	kFFJh8	0.0516	0.6054	outcome	TRUE	reported	textfile	11	65582028	3592	0.02695	6.086e-06	1797	TRUE	reported	ZMPMme	0.2794	2	TRUE	6021	0.00568202	20.515	0.00109202
rs10763431	C	T	C	T	0.1126	0.0251	0.3644	0.6226	FALSE	FALSE	FALSE	kFFJh8	0.0518	0.6286	outcome	TRUE	reported	textfile	10	58623676	3592	0.02504	7.077e-06	1797	TRUE	reported	ZMPMme	0.3644	2	TRUE	6021	0.00559801	20.21	0.00111767
[truncated: 4,898 more rows]
