# Supplementary material for: Causal effects of immune cell surface antigens and functional outcome after ischemic stroke: a Mendelian randomization study
Source: Front Immunol. 2024 Mar 18;15:1353034. doi: 10.3389/fimmu.2024.1353034 (PMC10982317; doi:10.3389/fimmu.2024.1353034)
Supplement: Supplementary file 4 [file Table_3.xlsx]

## Sheet: Sheet1
Table S3. Reverse MR analysis of 13 immune cell surface antigens and post-stroke functional outcome
id.exposure	method	nsnp	b	se	pval	lo_ci	up_ci	or	or_lci95	or_uci95
CD20 on switched memory B cell || id:ebi-a-GCST90001761	Inverse variance weighted	6	0.0285617	0.0403911	0.479487	-0.050605	0.107728	1.02897	0.950654	1.11375
CD24 on switched memory B cell || id:ebi-a-GCST90001773	Inverse variance weighted	9	-0.00861026	0.0356361	0.809077	-0.0784569	0.0612364	0.991427	0.924542	1.06315
CD38 on CD3- CD19- || id:ebi-a-GCST90001810	Inverse variance weighted	5	-0.0224823	0.0764606	0.768729	-0.172345	0.12738	0.977769	0.841689	1.13585
IgD on IgD+ CD38dim B cell || id:ebi-a-GCST90001825	Inverse variance weighted	9	0.00805443	0.0387239	0.835232	-0.0678445	0.0839533	1.00809	0.934406	1.08758
CD3 on Effector Memory CD4+ T cell || id:ebi-a-GCST90001843	Inverse variance weighted	8	0.0167186	0.0422149	0.69208	-0.0660227	0.0994599	1.01686	0.93611	1.10457
CD28 on CD39+ secreting CD4 regulatory T cell || id:ebi-a-GCST90001888	Inverse variance weighted	8	-0.0073178	0.0395979	0.853384	-0.0849297	0.0702941	0.992709	0.918577	1.07282
CD28 on CD28+ CD45RA- CD8+ T cell || id:ebi-a-GCST90001893	Inverse variance weighted	7	0.0465185	0.0545962	0.394189	-0.0604901	0.153527	1.04762	0.941303	1.16594
CD25 on CD39+ resting CD4 regulatory T cell || id:ebi-a-GCST90001938	Inverse variance weighted	8	0.0188187	0.0381284	0.621617	-0.055913	0.0935504	1.019	0.945621	1.09807
PDL-1 on monocyte || id:ebi-a-GCST90002002	Inverse variance weighted	8	-0.0222249	0.0365395	0.543026	-0.0938424	0.0493925	0.97802	0.910426	1.05063
CCR2 on granulocyte || id:ebi-a-GCST90002018	Inverse variance weighted	4	-0.039919	0.0761739	0.600244	-0.18922	0.109382	0.960867	0.827605	1.11559
CD4 on CD39+ CD4+ T cell || id:ebi-a-GCST90002061	Inverse variance weighted	8	-0.0149579	0.0489775	0.760058	-0.110954	0.081038	0.985153	0.89498	1.08441
CD4 on secreting CD4 regulatory T cell || id:ebi-a-GCST90002068	Inverse variance weighted	6	-0.00506583	0.0461636	0.912618	-0.0955465	0.0854148	0.994947	0.908876	1.08917
