# Supplementary material for: Causal effects of immune cell surface antigens and functional outcome after ischemic stroke: a Mendelian randomization study
Source: Front Immunol. 2024 Mar 18;15:1353034. doi: 10.3389/fimmu.2024.1353034 (PMC10982317; doi:10.3389/fimmu.2024.1353034)
Supplement: Supplementary file 5 [file Table_4.xlsx]

## Sheet: Sheet1
Table S4. Sensitive analyses between 13 immune cell surface antigens and post-stroke functional outcome (without adjustment for baseline NIHSS)
exposure	method	p	or	or_lci95	or_uci95
CD20 on switched memory B cell || id:ebi-a-GCST90001761	Inverse variance weighted	0.0358389	1.14184	1.00881	1.29242
	MR Egger (slope)	0.295942	1.19199	0.863958	1.64457
	Weighted median	0.0792369	1.1775	0.981109	1.41319
	MR-PRESSO	0.047	1.14	1.00881	1.29242
	MR-Egger (intercept)	0.778522	NA
	MR-PRESSO global test	0.465
	Cochran’s Q test	0.44441
CD24 on switched memory B cell || id:ebi-a-GCST90001773	Inverse variance weighted	0.038657	1.14897	1.00727	1.3106
	MR Egger (slope)	0.582771	0.904518	0.635639	1.28713
	Weighted median	0.17814	1.14515	0.940116	1.39489
	MR-PRESSO	0.046	1.14	1.00965	1.30751
	MR-Egger (intercept)	0.166045	NA
	MR-PRESSO global test	0.518
	Cochran’s Q test	0.509299
CD25 on CD39+ resting CD4 regulatory T cell || id:ebi-a-GCST90001938	Inverse variance weighted	0.0337568	0.810182	0.667087	0.983972
	MR Egger (slope)	0.285481	0.79643	0.53768	1.1797
	Weighted median	0.0430403	0.763684	0.588154	0.991598
	MR-PRESSO	0.035	0.81	0.683734	0.960015
	MR-Egger (intercept)	0.92387	NA
	MR-PRESSO global test	0.714
	Cochran’s Q test	0.665484
PDL-1 on monocyte || id:ebi-a-GCST90002002	Inverse variance weighted	0.0133662	1.26922	1.05077	1.53309
	MR Egger (slope)	0.122437	1.43794	0.942989	2.19269
	Weighted median	0.0834588	1.2537	0.970526	1.61949
	MR-PRESSO	0.016	1.27	1.07651	1.49644
	MR-Egger (intercept)	0.531326	NA
	MR-PRESSO global test	0.721
	Cochran’s Q test	0.680574
